# Supplementary material for: Undinarchaeota illuminate DPANN phylogeny and the impact of gene transfer on archaeal evolution
Source: PubMed Central journal article supplement (PMC7414124; doi:10.1038/s41467-020-17408-w), 2020-08-07
Supplement: 41467_2020_17408_MOESM1_ESM.pdf [file 41467_2020_17408_MOESM1_ESM.pdf]

## Supplementary Information for:

# Undinarchaeota illuminate DPANN phylogeny and the impact of gene transfer on archaeal evolution

Nina Dombrowski<sup>1</sup>, Tom A. Williams<sup>2</sup>, Benjamin J. Woodcroft<sup>3</sup>, Jiarui Sun<sup>3</sup>, Jun-Hoe Lee<sup>4</sup>, Bui Quang Minh<sup>5</sup>, Christian Rinke<sup>3</sup>, Anja Spang<sup>1,4,#</sup>

<sup>1</sup>NIOZ, Royal Netherlands Institute for Sea Research, Department of Marine Microbiology and Biogeochemistry, and Utrecht University, P.O. Box 59, NL-1790 AB Den Burg, The Netherlands

<sup>2</sup>School of Biological Sciences, University of Bristol, Bristol, BS8 1TQ, UK

<sup>3</sup>Australian Centre for Ecogenomics, School of Chemistry and Molecular Biosciences, The University of Queensland, QLD 4072, Australia

<sup>4</sup>Department of Cell- and Molecular Biology, Science for Life Laboratory, Uppsala University, SE-75123, Uppsala, Sweden

<sup>5</sup>Research School of Computer Science and Research School of Biology, Australian National University, ACT 2601, Australia

#corresponding author. Postal address: Landsdiep 4, 1797 SZ 't Horntje (Texel). Email address: [anja.spang@nioz.nl](mailto:anja.spang@nioz.nl). Phone number: +31 (0)222 369 526

|    |                                                                                   |    |
|----|-----------------------------------------------------------------------------------|----|
| 1  | <b>Table of Contents</b>                                                          |    |
| 2  |                                                                                   |    |
| 3  | <b>Supplementary Discussion</b> .....                                             | 3  |
| 4  | General.....                                                                      | 3  |
| 5  | <i>Evaluating CheckM completeness estimates</i>                                   |    |
| 6  | <i>Assessment of metagenomic binning</i>                                          |    |
| 7  | Placement of Undinarchaeota and DPANN in archaeal phylogeny.....                  | 4  |
| 8  | Informational processing and repair systems.....                                  | 7  |
| 9  | <i>Replication and cell division</i>                                              |    |
| 10 | <i>Transcription</i>                                                              |    |
| 11 | <i>Translation</i>                                                                |    |
| 12 | <i>DNA-repair and modification</i>                                                |    |
| 13 | <i>Stress tolerance</i>                                                           |    |
| 14 | Metabolic features.....                                                           | 10 |
| 15 | <i>Central carbon metabolism</i>                                                  |    |
| 16 | <i>Redox balance</i>                                                              |    |
| 17 | <i>Energy metabolism</i>                                                          |    |
| 18 | Anabolism.....                                                                    | 13 |
| 19 | <i>Purine and pyrimidine biosynthesis.</i>                                        |    |
| 20 | <i>Amino acid degradation and biosynthesis</i>                                    |    |
| 21 | <i>Lipid biosynthesis</i>                                                         |    |
| 22 | <i>Vitamin and cofactor biosynthesis</i>                                          |    |
| 23 | Host-symbiont interactions.....                                                   | 16 |
| 24 | <i>Genes potentially involved in host-symbiont interactions</i>                   |    |
| 25 | <i>Horizontal gene transfer among Undinarchaeota and other microbial lineages</i> |    |
| 26 | Taxonomic descriptions .....                                                      | 19 |
| 27 | <b>Supplementary Figures</b> .....                                                | 20 |
| 28 | <b>Supplementary References</b> .....                                             | 86 |
| 29 |                                                                                   |    |
| 30 |                                                                                   |    |

## 31 **Supplementary Discussion**

### 32 **General**

33 *Evaluating CheckM completeness estimates.* Out of 147 archaeal marker genes used by CheckM<sup>1</sup>  
34 for estimating genome completeness, seven were absent in all twelve Undinarchaeota metagenome-  
35 assembled genomes (MAGs) and in some cases were also absent from Cluster 1 and/or Cluster 2 DPANN  
36 archaea (see Main Text for definition of the clusters). Here, we briefly want to discuss these marker  
37 proteins and the potential consequences for estimating genome completeness. (1) PF01287 encodes  
38 translation initiation factor 5A and is absent in all Undinarchaeota. However, when searching for the  
39 corresponding arCOG (arCOG04277; Supplementary Data 9) it seems that all archaea, including  
40 Undinarchaeota, encode this protein suggesting that the PFAM might not be ideal to search for the  
41 presence of this protein in at least some archaea. (2) Rps27e homologs (arCOG04108, PF01667) are almost  
42 uniquely lacking in Undinarchaeota (see discussion below) and thus do not seem to be universal for this  
43 lineage. (3) Similarly, *EIF6* homologs (arCOG04176, PF01912) are absent in Undinarchaeota though present  
44 in all other archaeal lineages. (4) PF01982/arCOG01904 homologs appear to be absent in Undinarchaeota  
45 and most Cluster 2 DPANN archaea with the exception of Nanohaloarchaeota. This protein encodes a CTP-  
46 dependent riboflavin kinase (RFK) commonly found in archaea. However, as we discuss below vitamin  
47 biosynthesis genes are commonly absent in DPANN and thus proteins involved in vitamin biosynthesis are  
48 less ideal to determine genome completeness for this clade. (5) PF04127 homologs are absent in almost  
49 all DPANN except Altiarchaeota and encode the coenzyme A biosynthesis bifunctional protein (CoaBC),  
50 which is involved in vitamin biosynthesis and thus also expected to be absent in most DPANN archaea. (6)  
51 TIGR00432/arCOG00989 homologs are absent in all DPANN archaea with the exception of Nanoarchaeota  
52 and Altiarchaeota. The gene encodes the tRNA-guanine(15) transglycosylase, which is involved in a unique  
53 archaeal pathway for archaeosine-tRNA biosynthesis. (7) TIGR01213/arCOG01015 is absent in most  
54 DPANN with the exception of Aenigmarchaeota and Nanoarchaeota. The gene encodes a tRNA-  
55 pseudouridine synthase responsible for synthesis of pseudouridine from uracil-54 and uracil-55.  
56 Altogether, these findings suggest that the marker gene set used by CheckM includes a subset of genes,  
57 which is absent in a large proportion of DPANN archaea and thus may underestimate the completeness  
58 of DPANN genomes. Therefore, we additionally assessed genome-completeness with a set excluding these  
59 seven markers and provide the alternative and perhaps more accurate completeness and contamination  
60 estimates in parenthesis in Table 1 and Supplementary Data 2.

61  
62 *Assessment of metagenomic binning.* Contigs were manually investigated for signs of  
63 contamination by screening for an abnormal GC-content (~10% difference of average GC-content) and/or  
64 taxonomic affiliation based on a DIAMOND<sup>2</sup> search against ncbi\_nr (Supplementary Data 7; details  
65 described in the Methods). We noticed that some Undinarchaeota MAGs (e.g. contig GCA\_002494525\_5)  
66 have a region of ~30 proteins that, based on a DIAMOND search, show high similarity to proteins encoded  
67 on a fosmid classified as uncultured marine group II/II euryarchaeote\_KM3\_51\_D01<sup>3</sup>. However,  
68 phylogenetic analyses of marker proteins encoded in this region revealed that they clustered with  
69 homologs of Undinarchaeota rather than with homologs of Marine Group II/III Archaea. Furthermore, we

70 compared the average amino acid (AAI) of the fosmid of KM3\_51\_D01 with Undinarchaeota, which  
71 showed 84% AAI to Undinarchaeales and 59% AAI to Naiadarchaeales, suggesting that this fosmid was  
72 incorrectly assigned to Euryarchaeota and should rather be classified as uncultivated archaeal fosmid.

### 73 **Placement of Undinarchaeota and DPANN in archaeal phylogeny**

74 In published phylogenetic analyses, Undinarchaeota (originally named UAP2) branched sister to  
75 all other DPANN archaea<sup>4,5</sup>. To evaluate this placement and assess DPANN monophyly, we performed in-  
76 depth phylogenetic analyses using different sets of representative archaeal taxa (364 and 127 taxa set)  
77 and marker proteins as well as using concatenated 16S and 23S rRNA gene sequences (see below). In brief,  
78 the initial protein set was based on a selection of 151 markers used in previous studies, such as ribosomal  
79 protein marker sets, the Genome Taxonomy Database (GTDB) and the PhyloSift marker set<sup>4,6-8</sup>. Notably,  
80 initial phylogenetic analyses of single gene trees, including both archaeal, bacterial and eukaryotic  
81 homologs of these 151 commonly used markers, revealed that 39 protein did not recover archaeal  
82 monophyly suggesting that they are unsuited for concatenated marker protein analyses. In turn, we  
83 excluded these 39 markers as well as translation elongation factor aEF-2 (TIGR00490; arCOG01559), which  
84 has two paralogs in some archaeal lineages<sup>9</sup>, from our initial marker set (Supplementary Data 4,5).

85 To further assess the suitability of marker proteins for concatenated gene trees, we scored the  
86 remaining markers based on the recovery of well accepted monophyletic archaeal taxa defined at the  
87 order to phylum level (see Methods), i.e. we penalized markers, whenever any of these clades were  
88 paraphyletic: Geothermarchaeota, Halobacteria, Methanonatronarchaeales, Methanomicrobiales,  
89 Methanosarcinales, Methanocellales, Methanophagales, Archaeoglobales, Thermoplasmatales,  
90 Acidiprofundales, Methanomassiliicoccales, Poseidoniales, Thermoplasmata (unassigned at order level),  
91 Pontarchaea (MG-III), Undinarchaeota, Woesearchaeota, Pacearchaeota, NovelDPANN\_1 (UAP1),  
92 Parvarchaeota, Nanohaloarchaeota, Aenigmarchaeota, Diapherotrites, Huberarchaeota, Micrarchaeota,  
93 Altiarchaeota, Methanopyrales, Methanobacteriales, Methanococcales, Desulfurococcales, Sulfolobales,  
94 Thermoproteales, Marsarchaeota, Thermococcales, Theionarchaea, Methanofastidiosa, Hadesarchaea,  
95 Persephonarchaea, Odinarchaeota, Verstraetearchaeota, Thorarchaeota, Lokiarchaeota,  
96 Heimdallarchaeota, Bathyarchaeota, Thaumarchaeota, Korarchaeota, Aigarchaeota, Geoarchaeales,  
97 Hydrothermarchaeota and Nanoarchaeota. Violation of monophyly was counted as splits - as described  
98 in the methods using a script that we make available in git-hub (count\_sister\_taxa.py;  
99 [https://github.com/Tancata/phylo/blob/master/count\\_sister\\_taxa.py](https://github.com/Tancata/phylo/blob/master/count_sister_taxa.py)) - which provided a mean to rank  
100 the marker proteins based on congruency and potential events of horizontal gene transfer (HGT). Please  
101 note, that we did not make any a priori assumptions regarding the relationship of any of these clades with  
102 each other, i.e. our markers did not require that certain clans such as the DPANN are monophyletic. This  
103 is important because DPANN monophyly remains debated and we did not want to bias our marker protein  
104 assessment. Subsequently, concatenated alignments were created by combining the 25%, 50% and 75%  
105 highest (least amount of potential HGTs) - as well as 25% and 50% lowest-scoring (highest amount of  
106 potential HGTs) marker proteins (Supplementary Data 4,5). These datasets were subjected to a variety of  
107 Bayesian and Maximum-likelihood-based phylogenetic analyses that differed with respect to model as  
108 well as data treatment, such as removal of fast-evolving or compositionally heterogeneous sites, and the  
109 results are shown in Supplementary Data 6 and Supplementary Figs. 8-58.



110 All our inferences based on the curated marker protein sets recovered a monophyletic DPANN  
111 clan and consistently placed Undinarchaeota as an independent lineage branching between two  
112 monophyletic DPANN clans, here referred to as Cluster 1 DPANN archaea including Altiarchaeota,  
113 Micrarchaeota and Diapherotrites and Cluster 2 DPANN archaea including Nanoarchaeota,  
114 Pacearchaeota, Woesearchaeota, Huberarchaeota, Parvarchaeota and Nanohaloarchaeota  
115 (Supplementary Figs. 8-47, Supplementary Data 6). In particular, the consistent placement of  
116 Altiarchaeota within Cluster 1 is notable, since the evolutionary history of this archaeal lineage remains  
117 an ongoing matter of debate<sup>10-14</sup>.

118 Subsequently and as detailed in the main text, we addressed the effect of using highly incongruent  
119 markers with a high degree of splits (i.e. non-monophyletic archaeal taxa, see above) on phylogenetic  
120 analyses by inferring phylogenetic trees using 25% and 50% of the lowest ranking markers (Supplementary  
121 Data 4,5). Notably, resulting phylogenetic trees recovered topologies inconsistent with the accepted  
122 archaeal taxonomy and confirming the unsuitability of these markers due to conflicting evolutionary  
123 signals (Supplementary Figs. 48-51). For instance, in trees inferred using the 25% lowest ranking marker  
124 set, known symbionts, such as Nanoarchaeota and Nanohaloarchaeota, clustered with their crenarchaeal  
125 or halobacterial hosts, respectively (Supplementary Fig. 48-49). This is in line with results from the  
126 investigation of phylogenetic relationships among archaeal clades across 520 protein trees (see below,  
127 Methods and Main Text), in which Halobacteria and Nanohaloarchaeota frequently cluster together,  
128 indicating HGT or similar compositional biases (Figure 4, Supplementary Data 22). Importantly, this  
129 suggests that conflicting signals regarding the placement of certain archaeal clades, in particular members  
130 of the DPANN archaea, may in part be due to the use of unsuitable markers in phylogenetic  
131 reconstructions based on protein concatenations (Supplementary Figure 7). However, it has to be noted  
132 that lower-ranked markers in addition seem to, on average, be shorter and have less phylogenetic signal  
133 than higher-ranked markers (Supplementary Figure 6).

134 Considering that previous analyses<sup>4,5</sup> suggested that the Undinarchaeota lineage represents an  
135 outgroup of all DPANN lineages, we further addressed the reliability of our inferences by accounting for  
136 effects imposed by fast-evolving<sup>15,16</sup> or compositionally heterogeneous sites<sup>17</sup>. In particular, and to ensure  
137 that the placement of Undinarchaeota is not affected by such artefacts, fast-evolving and compositionally  
138 heterogeneous sites were removed using the SlowFaster method<sup>15</sup> and chi2 testing<sup>18</sup>, respectively. In  
139 brief, 10%, 20%, 30% and 40% of the most biased sites were removed from alignments generated using  
140 the 25% and 50% highest ranked marker proteins both from the 127 and 364 taxa set (Supplementary  
141 Data 6, Supplementary Figs. 15-24 and 32-42). All analyses confirmed the placement of Undinarchaeota  
142 as an independent lineage emerging between DPANN Cluster 1 and Cluster 2 archaea. Furthermore, these  
143 analyses confirmed the placement of Altiarchaeota within Cluster 1 DPANN. The most notable difference  
144 between the treated and untreated alignments was the placement of Methanonatronarchaeia<sup>19</sup>. In  
145 agreement with a recent study addressing the effect of compositional biases and/or fast-evolving sites<sup>20</sup>,  
146 our analyses indicated that Methanonatronarchaeia form a sister lineage of Halobacteria in full  
147 alignments, while forming an early branching Methanotecta<sup>13</sup> lineage when biased sites are removed  
148 (Supplementary Figs. 15-24, 33-37 and 39-40). In turn, it seems likely that the sisterhood of Halobacteria  
149 and Methanonatronarchaeia is due to a phylogenetic artifact perhaps resulting from convergent sequence  
150 adaptations to high salinity.

151           Next, we investigated tree topologies inferred from several non-curated alignments as well as  
152 published marker protein sets, such as a ribosomal marker set<sup>4</sup>, the GTDB marker set<sup>6</sup> and the PhyloSift  
153 markers<sup>7</sup>, as well as 16S and 23S rRNA genes. Unexpectedly, these trees not only showed inconsistent  
154 placements for the Undinarchaeota lineage but also for the Altiarchaeota. First of all, an analysis based  
155 on an alignment of 34 concatenated marker proteins of the PhyloSift marker set (alignment length of  
156 5,353 amino acids, Supplementary Figure 52), placed Altiarchaeota as a separate archaeal lineage  
157 emerging in-between DPANN (including Undinarchaeota) as a whole and all other Archaea, respectively  
158 (support values of 87.7/89). In this case, the Undinarchaeota lineage represented the first diverging  
159 DPANN lineage. Secondly, an alignment consisting of 14 concatenated ribosomal proteins (alignment  
160 lengths of 1,974 (trimmed with BMGE) and 2,406 (trimmed with trimAL)) recovered Undinarchaeota as  
161 an independent lineage emerging in-between all DPANN (including Altiarchaeota) and all other Archaea  
162 (support values of 99.7/100 and 99.2/99), respectively (Supplementary Figs. 55-56) as has been assumed  
163 previously<sup>4,5</sup>. Thirdly, in phylogenetic trees recovered from the complete set of 122 archaeal marker  
164 proteins used by GTDB (Supplementary Figs. 53-54), Altiarchaeota formed a separate branch forming a  
165 sister group to all DPANN Archaea (bootstrap supports of 85.3/98 and; using IQ-tree and bootstrap  
166 support 1; using FastTree). Here, Undinarchaeota branched as a sister lineage of Cluster 2 DPANN  
167 (Supplementary Data 6). Finally, we performed a concatenated analysis of the 16S and 23S rRNA genes  
168 using the 364 taxa set. In contrast to protein phylogenies, these analyses (depending on trimming method  
169 and alignment filtering) recovered Undinarchaeota in between Cluster 1 and Cluster 2 DPANN archaea  
170 (Supplementary Figure 4; 93.7/80) or as a sister lineage of the Aenigmarchaeota (Supplementary Figure  
171 3; 95.7/86), while Altiarchaeota formed a monophyletic cluster with Micrarchaeota and Diapherotrites  
172 (88.1/90 bootstrap support) (Supplementary Figs. 3-5). However, these latter analyses recovered several  
173 unexpected groupings and trees were characterized by overall low support in deeper branches and were  
174 likely affected by long-branch attraction (LBA) artefacts<sup>21</sup>. In addition, alignments of concatenated 16S  
175 and 23S rRNA gene sequences were relatively short (3,128 nucleotides) and likely harbored insufficient  
176 information to resolve deeper branches in the tree as indicated by low support values. Finally, 16S and  
177 23S rRNA genes have previously been shown to be good molecular thermometers that reflect the optimal  
178 growth temperature of organisms<sup>22,23</sup>. In turn, the sequence composition of rRNA genes can be biased  
179 and impair the accurate assessment of phylogenetic relationships.

180           These analyses highlight the importance of carefully assessing the suitability of marker protein  
181 sets as well as of determining the effect of compositional biases on phylogenetic inferences aiming to  
182 address archaeal evolution<sup>20,24</sup>. In particular, many commonly used marker protein sets seem to comprise  
183 protein families unsuitable for concatenation: for instance, single-protein tree analyses of the PhyloSift  
184 and 122 GTDB markers not only revealed that some markers were exchanged horizontally with bacteria  
185 (violation of archaeal monophyly) but also indicated that several of these markers failed to recover  
186 monophyly of well-accepted archaeal order- to phylum-level lineages indicating horizontal exchange  
187 (Supplementary Data 4,5).

188           Altogether, our extensive phylogenetic reconstructions provide strong support for a clan  
189 consisting of Undinarchaeota as sister lineage of DPANN Cluster 2 archaea, as well as the placement of  
190 Altiarchaeota as part of a clan comprising Cluster 1 DPANN archaea. Monophyly of the DPANN clan in turn  
191 solely depends on the placement of the root (see Main Text).

192 **Informational processing and repair systems**

193 A common feature of symbionts, particularly bacterial endosymbionts, is the loss of genes related  
194 to energy production, general biosynthetic pathways, DNA repair mechanisms and to a lesser degree  
195 informational processing<sup>25</sup>. To elucidate whether similar patterns characterize the evolution of  
196 Undinarchaeota and DPANN archaea in general, we investigated the presence and absence of core genes  
197 involved in replication, transcription, translation and DNA repair processing.

198  
199 *Replication and cell division.* Undinarchaeota representatives encode most genes related to  
200 replication processes (Supplementary Figure 60, Supplementary Data 7-10). More specifically,  
201 Undinarchaeota MAGs encode two DNA polymerases: DNA polymerase B1 (PolB1, arCOG00328) and the  
202 two subunits of the DNA Polymerase D (arCOG04447 and arCOG04455). Additionally, two of the four  
203 aquifer representatives encode a DNA polymerase IV (Dpo4, arCOG04582). Furthermore, Undinarchaeota  
204 MAGs encode all replication-related proteins commonly found in archaea including ORC1-type DNA  
205 replication protein 1 (Orc1, arCOG00467) and several helicases including the potential replicative helicase  
206 Mcm2 (arCOG00439) and a DNA ligase (Lig, arCOG01347). Notably and in agreement with all other  
207 analyses and previously published results<sup>26</sup>, Cluster 2 DPANN archaea and Undinarchaeota encode a fused  
208 version of the DNA primase, i.e. PriS and PriL are encoded by one gene (Supplementary Fig. 59,  
209 Supplementary Data 11). Finally, they encode DnaG (arCOG04281) and two topoisomerases: type 1 (TopA;  
210 arCOG01527) and type 2 topoisomerase 6 (Top6AB; arCOG04143 and arCOG01165), while lacking genes  
211 for gyrase or reverse gyrase. However, this is not unexpected since gyrases are more sparsely distributed  
212 in archaea (Supplementary Figure 60)<sup>27,28</sup>. In particular, reverse gyrase seems to be uniquely found in  
213 hyperthermophiles (with an optimal growth temperature above 80°C) and thus represents a genetic  
214 marker for the adaptation to life at high temperatures<sup>14,29-33</sup>. In turn, the absence of reverse gyrase  
215 homologs in the herein analyzed MAGs suggests that they may not comprise hyperthermophiles. Each  
216 Undinarchaeota MAG encodes two paralogs of FtsZ cell division proteins (arCOG02201) as well as a  
217 septum site-determining protein MinD (K03609). Additionally, Undinarchaeota representatives encode  
218 histones (arCOG02144), chromosome segregation and condensation protein SpcA (K05896)<sup>34</sup> as well as  
219 the chromosomal protein MC1 (arCOG04743). MC1 is only found in a small number of archaeal lineages  
220 and plays a role in DNA bending and compaction in certain Euryarchaeota<sup>35-37</sup>.

221  
222 *Transcription.* With few exceptions, Undinarchaeota MAGs encode most proteins involved in  
223 transcription (Supplementary Figure 62, Supplementary Data 7-9), including all core subunits of the RNA  
224 polymerase (RpoA1; arCOG04257, RpoA2; arCOG04256, RpoB; arCOG01762, RpoD; arCOG04241, RpoK;  
225 arCOG01268, RpoL; arCOG04111, RpoF; arCOG01016, RpoH; arCOG04258, RpoE; arCOG00675, RpoN;  
226 arCOG04244 and RpoP; arCOG04341). Similar to many other archaea, Undinarchaeota representatives  
227 lack genes for RpoG (arCOG04271) and Rpo13 (arCOG05938)<sup>38</sup>, which do not seem to be required to form  
228 a functional RNA polymerase<sup>39</sup>. All transcription factors common to archaea, such as the transcription  
229 initiation factor IIB (Tfb, arCOG01981), transcription factor S (Tfs; arCOG00579) and transcription factor E  
230 (Tfe, arCOG04270), are present in Undinarchaeota. Interestingly, Tfs is found in Undinarchaeota and  
231 Cluster 2 but not Cluster 1 DPANN archaea (Supplementary Figure 62). Few non-essential genes related  
232 to transcription appear to be absent in Undinarchaeota MAGs: these include genes coding for the

233 DNA/RNA-binding protein Alba1 (arCOG01753) (only present in two aquifer Naiadarchaeales MAGs), as  
234 well as the complete absence of Rad3-related DNA helicase (DinG, arCOG00770) in Undinarchaeota, which  
235 is involved in nucleotide excision repair<sup>40</sup>.

236

237 *Translation.* Undinarchaeota MAGs seem to encode most proteins involved in translation  
238 (Supplementary Figure 63, Supplementary Data 7-10). For example, Undinarchaeota MAGs encode most  
239 ribosomal proteins and all archaeal tRNA synthetases. Two notable exceptions are Rpl30e (arCOG01752),  
240 which is absent in marine Undinarchaeales, and Rps27e (arCOG04108), which is lacking in all  
241 Undinarchaeota representatives. Rpl30e seems also absent in other archaea, such as Halobacteria,  
242 Nanohaloarchaeota and most Thermoplasmatales, and may therefore not be essential for building a  
243 functional ribosome<sup>41,42</sup>. On the other hand, Rps27e is found in all analyzed cultivated archaeal taxa and  
244 absent in only a subset of so-far uncultivated archaeal lineages such as all Undinarchaeota,  
245 Persephonarchaea (MSBL1), Poseidoniales (MG-II) and Pontarchaea (MG-III). Rps27e is likely involved in  
246 rRNA processing and is thought to be universally present in archaea and eukaryotes but absent in  
247 bacteria<sup>41,43</sup>. It remains to be determined to what extent the absence of Rps27e in Undinarchaeota impairs  
248 the functioning of their ribosomes.

249 Undinarchaeota MAGs also encode most translation-related proteins such as the initiation factors  
250 EifA (arCOG01179), Eif2 (arCOG04107), Eif5 (arCOG04277), the elongation factors Tuf (arCOG01561), EF1b  
251 (arCOG01988) and FusA (arCOG01559) as well as the potential terminating factor eRF1 (arCOG01742).  
252 Other proteins involved in translation that are present in Undinarchaeota MAGs include the ribonuclease  
253 P complex (Rnp1-4), ribonuclease Z (Rnz, arCOG00501), ribonuclease J (RnjA, arCOG00546) and  
254 endoribonuclease (Nob1, arCOG00721). However, and in contrast to most other archaea, Undinarchaeota  
255 seem to lack the translation factor Eif6 (arCOG04176), which has a ribosomal anti-association activity<sup>44</sup>,  
256 and the potential translation initiation ATPase Rli1 (K06174), which plays a role in the dissociation of the  
257 two ribosomal subunits<sup>45,46</sup>. HflX (arCOG00353), which potentially plays a role in ribosome recycling in  
258 bacteria and some archaea<sup>47</sup>, is also absent in Undinarchaeota representatives and it is unclear whether  
259 any other proteins can complement the function of these proteins.

260 Undinarchaeota MAGs encode the exosome subunits Rrp4/41/42 (arCOG00678, arCOG01575 and  
261 arCOG01574) but lack Csl4 (arCOG00676) as well as any Csl4-domain containing proteins (i.e. IPR039771,  
262 IPR030850). Csl4 plays a role in specificity and regulation of RNA processing<sup>48,49</sup> and interacts with DNA  
263 primase DnaG (arCOG04281)<sup>50</sup>. Experimental evidence suggests that a Csl4-Rrp4/41/42 complex (Csl4-  
264 exosome) degrades an oligo-A tail more effectively than a Rrp4-Rrp4/41/42 complex (Rrp4-exosome),  
265 suggesting that a complex without Csl4 might be still functional but possibly less efficient than the full  
266 complex<sup>48</sup>. Notably, the presence of a putative Rrp4-exosome without Csl4, seems to be a distinctive  
267 feature of Undinarchaeota and Cluster 2 DPANN archaea (Supplementary Figure 63, Supplementary Data  
268 9) and indicates a structural difference of their exosomes as compared to Cluster 1 DPANN and other  
269 archaea.

270 Undinarchaeota MAGs encode the necessary proteins to synthesize translationally modified  
271 residues including diphthamide (via Dph2/5/6; arCOG04112, arCOG04161 and arCOG00035)<sup>9</sup>. However,  
272 Undinarchaeota lack most genes related to the pathway for wyosine derivatives. Wyosine is important for  
273 post-translational modifications at position 37 of the phenylalanine-specific transfer RNA (tRNAPhe) that  
274 is common in archaea and eukaryotes<sup>51</sup>. Specifically, while Undinarchaeota MAGs encode a potential

275 Trm5 methyltransferase (arCOG00033), they lack the three other biosynthesis genes required for this  
276 pathway (Taw1/2/3; arCOG04174, arCOG10124 and arCOG04156). This finding suggests that members of  
277 this group can only methylate the N1 position of guanosine-37 and form m1G37 but no other derivatives.

278 Finally, Undinarchaeota MAGs encode several proteins involved in post-translational processes  
279 that include the two subunits required to assemble a potential proteasome (PsmAB, arCOG00971 and  
280 arCOG00970) as well as a chaperon of the HSP20-family (arCOG01832) and the thermosome chaperonin  
281 (ThsA; arCOG01257).

282

283 *DNA-repair and modification.* A common feature of bacterial organisms with reduced genomes is  
284 the absence of key proteins involved in DNA-repair<sup>25</sup>. However, Undinarchaeota MAGs appear to harbor  
285 most proteins related to DNA repair that are typically found in archaea (Supplementary Figure 60,  
286 Supplementary Data 7-10). Proteins related to recombination and repair that were detected in  
287 Undinarchaeota representatives include a holliday junction resolvase (Hjc, arCOG00919), a 5'-  
288 3'\_exonuclease (Fen1, arCOG04050), type III and V endonucleases (Nth; arCOG00459 and Nfi;  
289 arCOG00929), the DNA repair and recombination proteins RadAB (arCOG00415, arCOG00417), the  
290 double-strand break repair protein Rad50/Mre11 complex (SbcCD; arCOG00368 and arCOG00397) and  
291 the GroEL chaperonin (arCOG01257). However, Undinarchaeota MAGs seem to lack genes for a single-  
292 stranded-DNA-specific exonuclease (RecJ; arCOG00427), the Chaperone DnaK (arCOG03060) and the ATP-  
293 dependent DNA helicase (DinG, arCOG00770), which are otherwise found in most Archaea including most  
294 DPANN archaea. It remains to be assessed, whether other DNA helicases encoded by Undinarchaeota  
295 MAGs, such as the DNA double-strand break repair helicase (HerA, arCOG00280) or the uncharacterized  
296 ATP-dependent helicase (Lhr, arCOG00557), may function in DNA repair and functionally substitute for the  
297 lacking enzymes mentioned above.

298 A few proteins related to DNA repair show lineage-specific distributions across the  
299 Undinarchaeota representatives. For example, only marine Undinarchaeales but not aquifer  
300 Naiadarchaeales MAGs encode the alkylation repair enzyme AlkD (arCOG05122) and the  
301 exodeoxyribonuclease III (Xth, arCOG02207) as well as a type 4 uracil-DNA glycosylase (Ugd1m;  
302 arCOG00905), which is likely involved in base excision repair<sup>52</sup>. Naiadarchaeales MAGs on the other hand  
303 encode a methylated-DNA-protein-cysteine methyltransferase (Ogt, arCOG02724), involved in the repair  
304 of alkylation damage<sup>53</sup> and an 8-oxoguanine DNA glycosylase (Ogg, arCOG04357) that is involved in  
305 repairing oxidative DNA damage<sup>54</sup>.

306

307 *Stress tolerance.* Since it is likely that Undinarchaeota encounter fluctuating environmental  
308 conditions in marine and aquifer habitats, we next investigated each MAG for the presence of proteins  
309 involved in stress tolerance other than repair-related proteins (Supplementary Data 7-10). Marine  
310 Undinarchaeales representatives encode two heat-shock proteins of the HSP20 family<sup>55</sup> (arCOG01832 and  
311 arCOG01833), two potential glutaredoxins (arCOG02607, arCOG02608) and a Fe/Mn-containing  
312 superoxide dismutase (SodA, arCOG04147). Superoxide reductases, which are often found in anaerobic  
313 and microaerophilic microorganisms<sup>56</sup>, appear to be lacking. Two of the aquifer Naiadarchaeales MAGs  
314 encode peroxiredoxins (arCOG00310, arCOG00312), which might be involved in oxidative stress  
315 tolerance<sup>57</sup> and most Undinarchaeota MAGs encode a thioredoxin system (TrxAB; arCOG01972 and

316 arCOG01296) that may play a role in counteracting fluctuations in nutrient availability and oxygen status<sup>58</sup>.  
317 Overall, this suggests that Undinarchaeota utilize several systems to encounter oxidative stress.

## 318 **Metabolic features**

319 *Central carbon metabolism.* Next, we investigated key pathways of representatives of  
320 Undinarchaeota regarding carbon metabolism and potential modes of energy conservation. All  
321 Undinarchaeota MAGs have a low number of genes encoding carbohydrate and peptide transporters as  
322 well as carbohydrate degradation enzymes (CAZymes). The only putative transporters were PotE  
323 (arCOG00009), involved in amino acid transport, an uncharacterized solute transporter (arCOG00238;  
324 IPR001898), which might take up sulfate and/or dicarboxylate with the concomitant uptake of sodium  
325 ions<sup>59</sup>, a phosphate transporter (PitA, arCOG02267) and a potential tripartite tricarboxylate transporter  
326 (TTT; arCOG04469, PF01970; Supplementary Data 7, 9, 13). According to the Transporter Classification  
327 DataBase (TCDB), the TTT transporter is homologous to TctA (TCDB ID 2.A.80.2.1), which is predicted to  
328 be a putative citrate transporter<sup>60</sup>. Additionally, all marine Undinarchaeales MAGs encode cation anti-  
329 /symporters, such as the Na(+)/H(+) antiporter (KefB; arCOG01953) and the sodium:calcium antiporter  
330 (arCOG02881), which may be used to maintain osmotic balance in marine environments<sup>61,62</sup>. Consistently,  
331 KefB is only encoded by two aquifer MAGs and arCOG02881 was completely absent in Naiadarchaeales.

332 While Undinarchaeota MAGs encode a small number of peptidases, these may be involved in  
333 anabolism rather than catabolism (see below) (Fig. 2, Supplementary Data 7-9 and 15). In fact, we did not  
334 detect any signal peptide in any of the predicted peptidases (as determined by InterProScan including a  
335 SignalP search) suggesting that peptidases are located intracellularly. In turn, the most likely substrates  
336 used for central metabolism and energy conservation seem to be simple carbohydrates, such as pyruvate  
337 or acetate, or nucleic acids. While Undinarchaeota representatives lack specific sugar transporters, simple  
338 sugars could perhaps be taken up by passive diffusion<sup>63</sup>. Nucleic acids might be taken up via pili (encoded  
339 by Undinarchaeota MAGs, see below) and degraded into nucleosides via nucleases, such as ribonuclease  
340 J (RnjA, arCOG00546), ribonuclease HII (RhnAI; arCOG02942 and RhnB; arCOG04121)<sup>64</sup>, exonuclease III  
341 (XthA, arCOG02207)<sup>65</sup>, ATP-dependent RNA helicase (DeaD, arCOG00558), or endonuclease YncB  
342 (arCOG03192)<sup>66</sup>. Nucleoside triphosphates might be fed into the nucleoside degradation pathway via the  
343 AMP phosphorylase (DeoA, arCOG02013), ribose 1,5-bisphosphate isomerase (arCOG01124) and ribulose  
344 1,5-bisphosphate carboxylase (Rbcl; RuBisCO, arCOG04443), which would yield 3-phosphoglycerate<sup>67-69</sup>.  
345 This pathway has been discussed to be relevant for a range of DPANN archaea in previous studies<sup>69,70</sup>. Two  
346 Naiadarchaeales MAGs seem to encode a functional group III-b RuBisCO with the same key catalytic  
347 residues as found in the oxygen-sensitive RuBisCO found in *Methanocaldococcus jannaschii*<sup>71</sup>  
348 (Supplementary Figure 61a-c). MAGs from marine Undinarchaeales on the other hand encode a group-III-  
349 like RuBisCO homolog that, with the exception of the homolog of MAG GCA\_002502135, shows  
350 substitutions at the catalytic site in position 195 (aspartic acid (D) to glutamic acid (E)) and 196  
351 (phenylalanine/leucine/tyrosine (F/L/Y) to glycine (G)) (Supplementary Figure 61c). The substitution of D  
352 by E does not change the property of the side chains, which are both acidic and in turn have a negative  
353 charge. The main difference between these two amino acids is the length of the side chain, with E having  
354 one methyl-group more than D. On the other hand, even though both F/L/Y and G (Phenylalanine/  
355 Leucine/ Tyrosine and Glycine) are neutral, the side chains of F and Y differ from those of L and G with

356 respect to class (aliphatic versus aromatic). In turn, it remains to be determined, whether the substitution  
357 of D by E at position 195 could be compensated by the change of F/L/Y to G at position 196 and whether  
358 the RuBisCO-like proteins of marine Undinarchaeales have retained their canonical function. However,  
359 the presence of a conserved group-III RuBisCO and other major key genes of the AMP degradation  
360 pathway suggests that at least some aquifer Naiadarchaeales might use this pathway to produce 3-  
361 phosphoglycerate that can enter central carbon metabolism. However, it has to be noted that DeoA was  
362 only found in one and the RuBisCO only in two out of four Naiadarchaeales genomes. With the exception  
363 of MAG SRR2090159.bin1129 all had a relatively low completeness, such that the absence of these genes  
364 in several Naiadarchaeales could be either due to genome completeness or be signs of genome  
365 streamlining.

366 The gene repertoire of Undinarchaeota suggests that 3-phosphoglycerate produced by the AMP  
367 degradation pathway could enter the lower glycolytic pathway via their phosphoglycerate mutase (GpmA;  
368 arCOG01993 and ApgM; arCOG01696), enolase (Eno, arCOG01169) and phosphoenolpyruvate synthase  
369 (PpsA, arCOG01111), which would yield pyruvate and ATP. Pyruvate kinase (Pk, arCOG04120), which in  
370 most archaea converts phosphoenolpyruvate to pyruvate, is absent from Undinarchaeota  
371 representatives. The only enzyme that might fulfill this role in Undinarchaeota is PpsA, which is encoded  
372 by these MAGs and may be reversible, as reported in certain archaea<sup>72-74</sup>. Additionally, 9 out of 12  
373 Undinarchaeota representatives encode a putative pyruvate dehydrogenase complex (PdhABC;  
374 arCOG01054, arCOG01052 and arCOG01706) (found also in some other DPANN archaea (Supplementary  
375 Data 9)<sup>75</sup>), while lacking genes for oxoacid-ferredoxin oxidoreductase complexes (e.g. OorABDG; K00174  
376 to K00177, arCOG01599 to arCOG01608), which are common in other archaeal lineages<sup>76</sup>. Though the  
377 functional annotation of pyruvate dehydrogenases is challenging based on sequence information alone,  
378 it seems possible that Undinarchaeota members use this complex for the conversion of pyruvate to acetyl-  
379 CoA.

380 Acetyl-CoA could be further metabolized to acetate via the ADP-forming acetyl-CoA synthetase  
381 (AcdAB; arCOG01340 and arCOG01338), a reaction that would allow the production of ATP. Additionally,  
382 three MAGs of the aquifer Naiadarchaeales encode a putative aldehyde as well as alcohol dehydrogenase  
383 (PF00171 as well as PF08240 and arCOG01455, respectively). While none of the Undinarchaeota homologs  
384 are closely related to experimentally characterized enzymes, it seems possible that these Undinarchaeota  
385 representatives are able to ferment 3-phosphoglycerate to pyruvate (generating ATP via the lower  
386 glycolytic pathway) and ethanol (to remain redox balance).

387 Key enzymes of the glycolytic pathway, the 6-phosphofructokinase (Pfk, arCOG03370) and  
388 pyruvate kinase (Pk, arCOG04120), appear to be absent in Undinarchaeota MAGs (Fig. 2, Supplementary  
389 Data 7-9 and 12). Additionally, representatives of the Undinarchaeota lack genes for key proteins of the  
390 classical and modified versions of the Entner–Doudoroff (ED) pathway such as the gluconate dehydratase  
391 (Gad, arCOG01168) or 2-dehydro-3-deoxy-D-gluconate/2-dehydro-3-deoxy-phosphogluconate aldolase  
392 (K11395). The absence of the upper glycolytic pathway and ED-pathway coincides with the absence of  
393 carbohydrate-active enzymes belonging to the glycoside hydrolase (GH) family (Supplementary Data 14),  
394 indicating that members of Undinarchaeota are unable to utilize complex carbohydrates as carbon or  
395 energy sources. Additionally, Undinarchaeota MAGs lack most genes encoding enzymes linked to the TCA  
396 cycle. While representatives of the marine Undinarchaeales might be able to convert oxaloacetate to

397 malate using malate dehydrogenase (Mdh, arCOG00246), MAGs of the aquifer Naiadarchaeales encode a  
398 malic enzyme (MaeA, arCOG00853) that might convert malate to pyruvate.

399 Undinarchaeota MAGs encode genes for the initial steps of gluconeogenesis, i.e. the  
400 gluconeogenic enzymes that allow the conversion of pyruvate to fructose-6-phosphate, including the  
401 phosphoenolpyruvate synthase (PpsA, arCOG01111) and the bifunctional fructose-1,6-bisphosphate  
402 aldolase/phosphatase (Fbp, arCOG04180). While Fbp was originally suggested to be present in most  
403 archaea<sup>77</sup>, based on our analyses Fbp is detected in only a few representatives of the DPANN archaea  
404 other than Undinarchaeota and ~40% of genomes analyzed from Altiarchaeota (Supplementary Data 9).  
405 The presence of Fbp in Undinarchaeota MAGs suggests that members of this group are able to synthesize  
406 cellular building blocks via gluconeogenesis using 3-phosphoglycerate. Glyceraldehyde-3-phosphate and  
407 fructose-6-phosphate produced during gluconeogenesis might be fed into the non-oxidative pentose-  
408 phosphate pathway via a putative transaldolase (TalA, arCOG05061) and transketolase (TktA,  
409 arCOG01053) to produce pentoses such as ribose-5-phosphate. Pentoses could subsequently enter into  
410 anabolic pathways including the purine biosynthetic pathway.

411  
412 *Redox balance.* The absence of genes encoding enzymes involved in the oxidative phase of the  
413 pentose pathway as well as the lack of isocitrate dehydrogenase (Icd, arCOG01164), NADH  
414 dehydrogenases or hydrogenases (Fig. 2, Supplementary Data 7-9) suggests that Undinarchaeota may use  
415 alternative enzymes to reduce NAD(P)<sup>+</sup> to NAD(P)H. One possible candidate enzyme for this conversion  
416 is the thioredoxin reductase (arCOG01296, TrxB)<sup>58</sup>, genes for which are present in most Undinarchaeota  
417 MAGs. Furthermore, Undinarchaeota MAGs encode glyceraldehyde-3-phosphate dehydrogenase (Gap,  
418 arCOG00493), and, in the case of the aquifer Naiadarchaeales representatives, also malic enzyme (MaeA,  
419 arCOG00853) and a NAD(P)-dependent glyceraldehyde-3-phosphate dehydrogenase (GapN,  
420 arCOG01252). All of these proteins could couple NADPH-generation to central carbon metabolism<sup>78</sup>.  
421 Another enzyme that plays a role in providing organisms with *de novo* NADP is the NAD kinase (NadK,  
422 arCOG01348)<sup>79</sup>, which is encoded by all aquifer MAGs. The absence of NadK in marine Undinarchaeota is  
423 interesting as most bacteria and archaea encode this enzyme<sup>79</sup>. One of the few characterized organisms  
424 that lack NadK is the obligate intracellular bacterium *Chlamydia trachomatis* that seems to rely on its host  
425 for NADP maintenance<sup>80</sup>. However, based on our analysis homologs of this enzymes seem also to be  
426 lacking in certain free-living archaea such as Methanococcales (Supplementary Data 9).

427  
428 *Energy metabolism.* Undinarchaeota MAGs lack genes encoding membrane-bound complexes  
429 belonging to the electron transport chain including NADH dehydrogenases, hydrogenases, cytochromes  
430 and terminal oxidases (Supplementary Data 9). Additionally, we could not detect any genes for terminal  
431 reductases, such as nitrate/nitrite reductase, sulfite reductase or fumarate reductase in the  
432 Undinarchaeota MAGs. However, an archaeal V-type ATP synthase is encoded by all Undinarchaeota  
433 representatives (AtpABCDEFHI; arCOG00868, arCOG00865, arCOG02459, arCOG04101, arCOG00869,  
434 arCOG04102, arCOG03363 and arCOG04138). Furthermore, most Undinarchaeota encoded a  
435 pyrophosphate-driven (instead of ATP-driven) sodium pump (HppA, arCOG04949), that may use energy  
436 conserved by pyrophosphate hydrolysis for proton movement across the membrane<sup>81-83</sup>.

437



438           Altogether, our analyses of the central carbon and energy metabolism of the herein reconstructed  
439 Undinarchaeota representatives indicate that members of this group are restricted to energy  
440 conservation using substrate-level phosphorylation. In fact, considering the limited substrate range and  
441 absence of various central carbon metabolic pathways as well as membrane-bound complexes, it seems  
442 possible that members of the Undinarchaeota rely on other organisms to sustain their living (see below)  
443 - a lifestyle common in members of the DPANN<sup>4,84</sup>.

#### 444 **Anabolism**

445           *Purine and pyrimidine biosynthesis.* Most aquifer Naiadarchaeales MAGs encode enzymes needed  
446 to convert ribose-5-phosphate into inosine monophosphate (IMP) (Fig. 2, Supplementary Data 7-9 and  
447 12), while MAGs from marine Undinarchaeales appear to lack key genes encoding proteins involved in  
448 purine biosynthesis. For example, phosphoribosylformylglycinamide cyclo-ligase (PurM, arCOG00639),  
449 phosphoribosylaminoimidazole-succinocarboxamide synthase (PurC, arCOG04421) and  
450 phosphoribosylaminoimidazole-succinocarboxamide formyltransferase (PurH, arCOG02824) were only  
451 found in either two or three marine Undinarchaeales MAGs while being present in most aquifer  
452 representatives. However, it has to be noted that not all steps of the purine biosynthesis pathway have  
453 been elucidated in archaea. For instance, it is currently unclear which enzyme catalyzes the conversion of  
454 5-aminoimidazole ribonucleotide to N5-carboxyaminoimidazole ribonucleotide<sup>85</sup>, which in bacteria is  
455 mediated by the N5-CAIR synthase (PurK, arCOG01597). Similarly, genes encoding the guanylate kinase  
456 (Gmk, K00942) seem to be absent not only from all Undinarchaeota MAGs but from archaeal genomes in  
457 general<sup>86</sup> (Supplementary Data 9) and it remains to be determined, which enzyme substitutes this reaction  
458 in Archaea.

459           The genes required to convert IMP to purines have a slightly inconsistent occurrence across  
460 marine and aquifer Undinarchaeota MAGs. For example, genes for IMP dehydrogenase (GuaB,  
461 arCOG00612), which catalyzes the conversion of IMP to xanthosine 5'-phosphate, were only found in  
462 three marine Undinarchaeales representatives (GCA\_002495465, SRR4028224.bin17 and  
463 SRR5007147.bin71) and one aquifer MAG (SRR2090153.bin1042), while genes for GMP synthase (GuaA,  
464 K01951), which catalyzes the second step, were present in two additional aquifer MAGs  
465 (SRR2090159.bin1129 and SRR2090159.bin1288). Genes encoding the nucleoside diphosphate kinase  
466 (Ndk, arCOG04313) and ribonucleoside-triphosphate reductase (NrdD, arCOG04889), required for the  
467 formation of dGTP, could be identified in most Undinarchaeota MAGs. Finally, adenylosuccinate  
468 synthetase (PurA, arCOG04387), which is required to convert IMP to adenylosuccinate, was only present  
469 in three aquifer MAGs, but the genes encoding the proteins involved in the production of dATP (PurB;  
470 arCOG01747, AdkA; arCOG01039, Ndk; arCOG04313 and NrdD; arCOG04889) were found in most  
471 Undinarchaeota MAGs. The lack of GuaB in most aquifer representatives is puzzling, since they harbor  
472 genes for most other steps of this pathway. In turn, it remains to be determined whether the absence of  
473 this gene is due to genome incompleteness or represent a true biological signal.

474           Next, our analysis of the pyrimidine biosynthesis pathway revealed that Undinarchaeota MAGs  
475 encoded most of the proteins necessary to convert carbamoyl phosphate to CTP and UTP<sup>86</sup>. These proteins  
476 include the carbamoyl-phosphate synthase (CarA, arCOG00064) catalyzing the first step in the pathway.  
477 Glutamine required by CarA likely cannot be synthesized by Undinarchaeota themselves but must be

478 taken up from the environment (see also discussion on amino acid biosynthesis pathways below). All  
479 enzymes required for the conversion of glutamine to uridine monophosphate (UMP), which are encoded  
480 by the PyrBCDEF (arCOG00911, arCOG00689, arCOG00603, arCOG00029, arCOG00081) gene cluster,  
481 were found in the majority of Undinarchaeota MAGs (Fig. 2, Supplementary Data 7-9). Furthermore,  
482 almost all MAGs encode the enzymes that convert UMP further into dCTP (PyrH; arCOG00858, PyrG;  
483 arCOG00063, Ndk; arCOG04313 and NdrD; arCOG04889), dUTP (Dcd, arCOG04048) and dTTP (ThyA;  
484 arCOG03214 and Tmk; arCOG01891). Notably, we could not identify genes for thymidylate synthase  
485 (ThyA; arCOG03214) or flavin-dependent thymidylate synthase (ThyX; arCOG01883) in most aquifer  
486 Naiadarchaeales MAGs while these were present in Undinarchaeales representatives. Considering the  
487 presence of all other enzymes of this pathway, it seems possible that the lack of *thyA/X* genes is due to  
488 genome incompleteness.

489  
490 *Amino acid degradation and biosynthesis.* Our analyses of the amino acid metabolism suggested  
491 that Undinarchaeota representatives lack most genes encoding enzymes required for amino acid  
492 biosynthesis and interconversion (Supplementary Data 7-9 and 12). The identified genes code for  
493 aminopeptidases that might be involved in the turnover of intracellular proteins or general protein  
494 processing. For instance, we found genes for leucyl aminopeptidase (PepA; arCOG04322), methionine  
495 aminopeptidase (Map; arCOG01001) and a potential membrane-associated serine protease of the S54  
496 family (GlpG, arCOG01768; IPR022764 and IPR035952)<sup>87</sup>. Aminopeptidases potentially involved in protein  
497 hydrolysis include a Xaa-Pro aminopeptidase (PepQ, arCOG01000) and a putative metallopeptidase  
498 (arCOG04217). Other enzymes related to amino acid metabolism, which were predicted to be present in  
499 Undinarchaeota representatives, could be involved in the interconversion of amino acids and respective  
500 organic acids. For example, the putative aspartate aminotransferases encoded by Undinarchaeota MAGs  
501 (AspC, arCOG01130) might convert L-aspartate and 2-oxoglutarate to glutamate and oxaloacetate, their  
502 serine hydroxymethyltransferase (GlyA, arCOG00070) could be involved in the interconversion of serine  
503 and glycine, a glutamate dehydrogenase (GdhA, arCOG01352) might produce glutamate without  
504 ammonia assimilation<sup>88</sup> and a cysteine desulfurase might interconvert cysteine and alanine (SufS,  
505 arCOG00065). The SufS of Undinarchaeota representatives may also function in iron-sulfur cluster  
506 assembly alongside with SufBCD<sup>89</sup> (arCOG01715, arCOG04236, TIGR01981), which are encoded by 10 out  
507 of 12 MAGs. Additionally, Undinarchaeota MAGs encode a potential serine-pyruvate aminotransferase  
508 (PucG, arCOG00082), which might transaminate L-serine and pyruvate to 3-hydroxypyruvate and alanine.  
509 While Undinarchaeota MAGs encode a 3-phosphoglycerate dehydrogenase (SerA, arCOG01754), which  
510 catalyzes the first step in serine biosynthesis, genes required to mediate the other two steps of this  
511 pathway, generally encoded by *serB* (arCOG00083) and *serC* (arCOG01158), were absent. However, it  
512 seems possible that an uncharacterized aminotransferase might complement the function of SerC. For  
513 example, in *Methanocaldococcus jannaschii* a broad-spectrum class V aminotransferase is sufficient for  
514 phosphoserine production<sup>90</sup>. The gene in the cited study belongs to arCOG00082, a homolog of which is  
515 present in Undinarchaeota. Interestingly, this protein has an aminotransferase class V domain  
516 (IPR000192) and thus might indeed be involved in serine biosynthesis in Undinarchaeota. Similarly, the  
517 function of phosphoserine phosphatase SerB might be mediated by another, so far uncharacterized  
518 phosphatase.

519           Altogether, the lack of many genes involved in amino acid metabolism suggests that  
520 Undinarchaeota representatives need to acquire amino acids from the environment or a host, for instance  
521 using the amino acid transporter PotE (arCOG00009) that is present in all MAGs (Supplementary Data 7).  
522 PotE has an amino acid/polyamine transporter domain (IPR002293) but lacks any additional domain that  
523 would allow to make more specific predictions regarding the identity of amino acids that could be taken  
524 up by this transporter. The lack of other amino acid transport systems could suggest that Undinarchaeota  
525 representatives require a host to obtain certain amino acids and other necessary metabolites (see also  
526 below) directly.

527  
528           *Lipid biosynthesis.* Previous analyses have revealed that many DPANN archaea lack lipid  
529 biosynthesis genes<sup>75,91</sup> and it was shown that several cultivated representatives such as *N. equitans* and  
530 potentially *Nanohaloarchaeum antarcticus*, acquire their lipids from their respective hosts<sup>92–94</sup>.  
531 Interestingly, especially aquifer Naiadarchaeales MAGs encode for a far more complete gene set for lipid  
532 biosynthesis than *N. equitans* and many other DPANN archaea (Fig. 2, Supplementary Data 7-9 and 12,  
533 Supplementary Figure 64). First of all, all Undinarchaeota MAGs encode the key genes for proteins  
534 involved in the mevalonate pathway, which allows the conversion of acetyl-CoA to isopentenyl-  
535 diphosphate (IPP). These proteins include HmgB (arCOG01767), HmgA (arCOG04260), Mvk (arCOG01028),  
536 MvaD (arCOG02937, IPR029765) and Ipk (arCOG00860). Furthermore, the presence of genes for  
537 geranylgeranyl diphosphate synthase (GGPS, arCOG01726), suggests that Undinarchaeota  
538 representatives have the ability to convert IPP further to geranylgeranyl diphosphate (GGPP), a precursor  
539 of ether-linked lipids<sup>95</sup>. Undinarchaeota MAGs also encode an undecaprenyl-diphosphate synthase (UppS,  
540 arCOG01532) that could convert GGPP to undecaprenyl diphosphate, which is a potential precursor of  
541 glycosyl carrier lipids<sup>96</sup>. Intriguingly, genes for enzymes synthesizing archaeol via the glycerophospholipid  
542 pathway seem to be solely encoded by aquifer but absent from marine Undinarchaeota MAGs. For  
543 instance, aquifer Naiadarchaeales code for glycerol-1-phosphate dehydrogenase (EgsA, arCOG00982) that  
544 transforms glycerone-1-phosphate to glycerol-1-phosphate and is essential to build the backbone of  
545 phospholipids<sup>97</sup>. Furthermore, two aquifer Naiadarchaeales MAGs (SRR2090159.bin1129 and  
546 SRR2090159.bin1288) encode phosphoglycerol geranylgeranyltransferase (GGGPS, arCOG01085), which  
547 could convert glycerol 1-phosphate and GGPP to geranylgeranylglycerol 1-phosphate, catalyzing the first  
548 step in archaeal lipid biosynthesis<sup>98</sup>. While all Undinarchaeota representatives encode a protein assigned  
549 to the arCOG00476 family comprising putative digeranylgeranylglyceryl phosphate synthases (DGGGP  
550 synthase), only the homologs identified in the aquifer MAGs harbor the characteristic DGGGP synthase  
551 domain (IPR023547). Finally, all aquifer MAGs encode enzymes for the last steps of the archaeal lipid  
552 biosynthesis: these include CDP-archaeol synthase (CarS, arCOG04106)<sup>99</sup>, as well as archaetidylinositol  
553 phosphate synthase (AIP synthase, arCOG00670), archaetidylserine synthase (AS synthase, arCOG00671)  
554 and the putative archaetidylserine decarboxylase (Psd, arCOG04470)<sup>100</sup>. Thus, while aquifer  
555 Naiadarchaeales seem to be able to synthesize their own lipids, marine Undinarchaeales representatives  
556 instead may rely on lipids or certain intermediates from potential interaction partners.

557  
558           *Vitamin and cofactor biosynthesis.* Undinarchaeota MAGs encode diverse enzymes whose  
559 function is dependent on the presence of vitamins and cofactors, such as thiamine-domain (IPR029061)  
560 containing proteins, such as the pyruvate dehydrogenase (PdhA, arCOG01054) and transketolase (Tk,

561 arCOG01051 and arCOG01053). Yet, Undinarchaeota MAGs seem to lack most genes coding for enzymes  
562 involved in vitamin biosynthesis pathways (Supplementary Data 7-9 and 12). The few enzymes present  
563 include the nicotinamide-nucleotide adenylyltransferase (NadR, arCOG00972) encoded by all aquifer  
564 Naiadarchaeales MAGs and dihydrofolate reductase (FolA, arCOG01490) found in marine  
565 Undinarchaeales representatives. Additionally, most Undinarchaeota representatives contain genes  
566 coding for a putative dephospho-CoA kinase (CoaE, arCOG01045) and a protein assigned to the  
567 arCOG04076 family, which comprises candidate enzymes for GTP-dependent dephospho-CoA kinases<sup>101</sup>.  
568 However, we could not detect genes for other enzymes involved in coenzyme A biosynthesis in any of the  
569 Undinarchaeota genomes such as coenzyme A biosynthesis bifunctional protein CoaB (arCOG01704) or  
570 phosphopantetheine adenylyltransferase (CoaD, arCOG01223). Additionally, Undinarchaeota MAGs seem  
571 to lack genes for transporters specific to coenzymes and vitamins, which would allow the uptake of these  
572 compounds (Supplementary Data 13). In turn, this further suggests that the herein analyzed  
573 Undinarchaeota representatives may depend on direct contact with a partner organism to acquire  
574 vitamins and cofactors.

## 575 **Host-symbiont interactions**

576 Comparative genome analyses revealed a limited set of central carbon metabolism related  
577 proteins as well as the low number of genes encoding transporters and enzymes involved in vitamin and  
578 amino acid biosynthesis, raising the possibility that Undinarchaeota representatives depend on partner  
579 organisms for growth. To shed more light onto potential interaction partners, we have analyzed proteins  
580 that may be involved in species-species interactions, inferred routes of horizontal gene transfer and  
581 generated proportionality networks (see Main Text).

582  
583 *Genes potentially involved in host-symbiont interactions.* Cellular appendages, such as pili and the  
584 archaellum, and other surface proteins (i.e. LamG-domain containing proteins) represent mechanisms  
585 reported to mediate cell-cell interactions<sup>4,102</sup>. While we did not detect genes encoding subunits of the  
586 archaellum<sup>103</sup>, it has previously been suggested that certain DPANN use pili to interact with their hosts<sup>104</sup>.  
587 Undinarchaeota MAGs have gene clusters encoding several proteins potentially involved in pili formation  
588 (VirB11; arCOG01818, TadC; arCOG01808, EppA; arCOG02300) as well as an uncharacterized protein with  
589 archaeal pilin domains (i.e. arCOG03871/IPR013373) (Supplementary Data 7-9). The potential VirB11  
590 protein contains a P-loop NTPase domain (IPR027417) and might generate energy from NTP hydrolysis<sup>105</sup>  
591 and TadC might provide an assembly platform for the assembly of pili<sup>106</sup>. Prepilins, which are encoded by  
592 10 out of 12 Undinarchaeota MAGs, could be transported through the membrane via the sec-transport  
593 system (secDEFGY encoded by arCOG03055, arCOG02204, arCOG03054, arCOG02957 and arCOG04169)  
594 and modified via potential prepilin peptidases (arCOG02298, arCOG02300 and arCOG02300). Some pili-  
595 related proteins seem to be present in aquifer Naiadarchaeales representatives but are not encoded by  
596 marine Undinarchaeales MAGs: these include CpaF (an uncharacterized protein with a type II/IV secretion  
597 system protein domain: arCOG01819; IPR001482) and uncharacterized proteins in the same genetic  
598 region that may functionally be related to pili formation such as a potential surface binding proteins  
599 (arCOG05787, arCOG03512). A potential VirB4 ATPase (arCOG04035) on the other hand is only encoded  
600 by marine Undinarchaeales MAGs.

601 Surface modification proteins, involved in the modification of S-layers and construction of  
602 extracellular matrices, represent additional means that may enable host-symbiont interactions<sup>107</sup>. While  
603 Undinarchaeota MAGs seem to lack S-layer proteins SlaA (arCOG06039) and SlaB (arCOG07272), they  
604 encode an uncharacterized S-layer protein (arCOG03418; IPR006454) as well archaeal glycosylation  
605 proteins, such as the glycosyltransferase AgIA (arCOG01410) and the protein glycotransferase AgIB  
606 (arCOG02044) that might be involved in S-layer protein N-glycosylation<sup>108</sup>. AgIA and B are encoded in the  
607 same genetic region as other archaeal glycosylation proteins (arCOG00899, arCOG03199) and potential  
608 membrane-binding proteins (arCOG05092, arCOG00395, arCOG07813 and arCOG02080). Overall, this  
609 suggests the presence of an S-layer or the potential of Undinarchaeota to generate an extracellular matrix  
610 that might play a role in cell-cell interactions. In support of the latter, we found that some of the longest  
611 proteins (~1400 amino acids) present in marine but not aquifer Undinarchaeota representatives encode  
612 LamG-like protein domains (arCOG07813; IPR006558), which might be involved in the formation of an  
613 extracellular matrix (Supplementary Data 16-19)<sup>109</sup>. LamG-like proteins in Undinarchaeota are often  
614 encoded in the same genetic region as potential S-layer proteins, glycosyltransferases (AgIA) or pilus-  
615 assembly proteins (TadA). Furthermore, our investigation found a suite of proteins discussed to be  
616 involved in cell-interactions<sup>75</sup> that are present in the Undinarchaeota MAGs and share similarity to  
617 proteins involved in cell adhesion (Supplementary Data 18,19). We also identified a hypothetical protein  
618 with TSP type-3 repeat domains (IPR028974, arCOG07561) in marine Undinarchaeales MAGs, which may  
619 represent another putative extracellular matrix protein. Finally, it is worth mentioning that similar to many  
620 other DPANN archaea<sup>75,110</sup>, Undinarchaeota MAGs do not seem to encode CRISPR-Cas systems, which,  
621 among others, are involved in viral defense<sup>111</sup>.

622  
623 *Horizontal gene transfer among Undinarchaeota and other microbial lineages.* It has previously  
624 been shown that intimately interacting organisms can share genes through horizontal gene transfer (HGT).  
625 For example, *N. equitans*, the first cultivated representative of the DPANN, and its host *I. hospitalis* seem  
626 to have exchanged several genes horizontally<sup>112,113</sup>. To investigate the possibility whether Undinarchaeota  
627 representatives have exchanged genes with potential hosts and to pinpoint routes of HGT, we  
628 reconstructed protein trees of all proteins present in at least three or more Undinarchaeota genomes (520  
629 genes total) and analyzed sisterhood relationships among taxonomically distinct lineages. In brief, we  
630 identified homologs of these 520 Undinarchaeota protein families in a reference set of 364 archaeal, 3020  
631 bacterial and 100 eukaryotic genomes and generated single protein trees. Subsequently, HGT events were  
632 identified using a custom script (count\_sister\_taxa.py;  
633 [https://github.com/Tancata/phylo/blob/master/count\\_sister\\_taxa.py](https://github.com/Tancata/phylo/blob/master/count_sister_taxa.py)) that allows to determine the next  
634 closest sister lineage of any lineage of interest (see Methods for details). Notably, this approach revealed  
635 significant fractions of potential HGTs among known DPANN symbiont-host systems (Fig. 4a, b,  
636 Supplementary Data 20-22). However, Undinarchaeota did not show a dominant fraction of genes shared  
637 with a specific lineage, i.e. most genes seemed to be shared with taxonomically closely related DPANN  
638 archaea. The largest number of proteins, in which certain Undinarchaeota homologs did not cluster with  
639 DPANN homologs, seemed to be related to homologs of Asgard archaea (16 proteins to Heimdall-, Loki-  
640 or Thorarchaeota), Bathyarchaeota (11 proteins), and Thermoplasmata (11 proteins to  
641 Thermoplasmatales, Pontarchaea or Poseidoniales) (Supplementary Data 20-22). Notably, the protein  
642 families potentially transferred among members of these archaeal lineages comprise components of

643 informational processing machineries such as a potential tRNA pseudouridine synthase (arCOG04252; one  
644 Bathyarchaeota clustering inside Undinarchaeota), RNA 3'-terminal phosphate cyclase (arCOG04125,  
645 transfer to Heimdallarchaeota) and ribosomal protein S19 (arCOG04099; transfer to Pontarchaea).  
646 Considering that genes for information processing are thought to evolve predominantly vertically but may  
647 be exchanged between known symbiont-hosts systems, this opens the possibility that marine  
648 Undinarchaeales engage in symbiotic interactions with one of these lineages.

649  
650 *Co-occurrence analyses.* Next, we used a read-based co-occurrence analysis to assess whether  
651 MAGs of Undinarchaeota are proportional to other archaeal and bacterial genomes<sup>114</sup> (see Methods for  
652 details). Unfortunately, we only detected Undinarchaeota in a low number of metagenome datasets, such  
653 that this analysis does not have sufficient statistical power to resolve co-proportionality with high support.  
654 In turn, we did not detect any significant co-occurrence patterns for members of the Naiadarchaeales and  
655 any other taxonomic lineage. In fact, the majority of genomes co-varying with Undinarchaeota MAGs  
656 belongs to other DPANN and Patescibacteria/CPR lineages, which are all characterized by small cell sizes  
657 and reduced genomes such that these co-occurrence patterns could be due to an artifact resulting from  
658 the enrichment of small cells for some of the samples (though interactions among members of these  
659 lineages cannot be excluded). The main observation was that marine Undinarchaeales appeared to co-  
660 vary with three genomes of the Chloroflexi, all belonging to the order Dehalococcoidales (Supplementary  
661 Figure 66). Most members of the Dehalococcoidales have small genomes (i.e. ~1.5 Mb for  
662 *Dehalococcoides mccartyi* 195, which however has a rather large cell size of 0.3-1  $\mu\text{m}$ ) and represent free-  
663 living heterotrophic bacteria that can use chlorinated compounds as electron acceptors<sup>115</sup>. While  
664 challenging to grow in isolation, Dehalococcoides can be maintained in enrichment cultures, in which they  
665 rely on acetate and hydrogen from other community members<sup>115</sup>. Based on metabolic gene repertoires  
666 of members of the Undinarchaeales, which are characterized by the absence of any of the known genes  
667 for the various hydrogenase protein families<sup>116</sup> (Supplementary Data 7), hydrogen-dependent syntrophy  
668 seems unlikely to support interactions with Dehalococcoides. Yet, a symbiotic relationship could be based  
669 on exchange of acetate or be of parasitic nature as observed in currently known host-symbiont  
670 systems<sup>94,117-120</sup>. It has to be noted, however, that the UAP2-positive metagenomes (see Supplementary  
671 Data 1) used for the proportionality analyses differ in respect to sampling method and filtering steps and  
672 we cannot exclude that correlation patterns are due to methodological artefacts. Therefore, prospective  
673 analyses of a larger number of metagenomes generated with consistent methodology and without  
674 filtering steps will be needed to further assess co-proportionality of Undinarchaeota with other organism  
675 groups.

676 Yet, since co-occurrence analyses predicted a potential association of marine Undinarchaeales  
677 with three Chloroflexi of the order Dehalococcoidales (Supplementary Figure 66) we manually  
678 investigated single-gene trees for potential transfers between these groups but could only identify a small  
679 fraction of candidate HGTs (Supplementary Figure 65). For example, a potentially transferred gene  
680 encodes a Fe-S cluster assembly ATPase SufC (arCOG04236). In the corresponding phylogeny, two  
681 Chloroflexi (*Thermogemmatispora carboxidivorans* and *Ktedonobacter* sp.) branch as a sister group of  
682 marine Undinarchaeales with low bootstrap support of 41%. Another potential transfer involves a gene  
683 for mevalonate kinase (arCOG01028). In particular, the undinarchaeal sequence from GCA\_002502135  
684 emerges from within a cluster of Chloroflexi (70% bootstrap support) (Supplementary Figure 65c).

685 However, the number of putative HGTs among Chloroflexi and Undinarchaeota are lower than the HGTs  
686 detected in other DPANN-host symbiont systems, such as Nanoarchaeota and Crenarchaeota, and do  
687 therefore not provide support for the association of Undinarchaeota with members of this bacterial  
688 lineage.

689 In turn, further analyses including fluorescence *in situ* hybridization will be needed to shed further  
690 light onto potential interaction partners of Undinarchaeota and test whether certain members of this  
691 group indeed interact with members of the Pontarchaea or Chloroflexi.

## 692 **Taxonomic descriptions**

693 '*Candidatus Undinarchaeum*' (Un.din.ar.chae'um. N.L. n. *Undina* female water spirit or nymph  
694 (from L. fem. n. *unda* water, wave); N.L. neut. n. *archaeum* (from Gr. adj. *archaios* ancient) archaeon; N.L.  
695 neut. n. *Undinarchaeum* an archaeon of water origin).

696 '*Candidatus Undinarchaeum marinum*' (ma.ri'num. L. neut. adj. *marinum* of the sea, marine).  
697 Type material is the genome designated as SRR4028224.bin17 representing '*Candidatus Undinarchaeum*  
698 *marinum*'. The genome "SRR4028224.bin17" represents a metagenome-assembled genome (MAG)  
699 consisting of 0.62 Mbps in 19 contigs with an estimated completeness of 95%, contamination of 0%, a  
700 16S, 23S, and 5S rRNA gene, and 21 tRNAs. The GC content of this MAG, recovered from a marine habitat  
701 (Moca4 metagenome, Atlantic Ocean), is 42.3%.

702 '*Candidatus Naiadarchaeum*' (Nai.ad.ar.cha'eum. L. fem. n. *Naias*, -adis a water-nymph of springs  
703 and streams, Naiad from Greek mythology; N.L. neut. n. *archaeum* (from Gr. adj. *archaios* ancient)  
704 archaeon; N.L. neut. n. *Naiadarchaeum* an archaeon from the freshwater).

705 '*Candidatus Naiadarchaeum limnaeum*' (lim.nae'um. N.L. neut. adj. *limnaeum* (from Gr. adj.  
706 *limnaios* from the marsh, lake) living in the freshwater). Type material is the genome designated as  
707 representing SRR2090159.bin1129 '*Candidatus Naiadarchaeum limnaeum*'. The genome  
708 "SRR2090159.bin1129" represents a metagenome-assembled genome (MAG) consisting of 0.98 Mbps in  
709 52 contigs with an estimated completeness of 96%, contamination of 2.9% (with 0% strain heterogeneity),  
710 a 23S and 5S rRNA gene, and 21 tRNAs. The GC content of this MAG, recovered from an aquifer habitat  
711 (Rifle well FP-101 under low O<sub>2</sub> conditions; 0.1 micron filter), is 37.9%

712 '*Candidatus Naiadarchaeaceae*' (Nai.ad.ar.chae.a.ce'ae. N.L. neut. n. *Naiadarchaeum* a  
713 (Candidatus) type genus of the family; -aceae ending to denote the family; N.L. fem. pl. n.  
714 *Naiadarchaeaceae* the *Naiadarchaeum* family).

715 The family is circumscribed based on concatenated protein phylogeny and rank normalisation  
716 approach as per Parks et al., (2018). The description is the same as that of its sole genus and species. Type  
717 genus is *Candidatus Naiadarchaeum*.

718 *Candidatus* Naiadarchaeales (Nai.ad.ar.chae.a'les. N.L. neut. n. *Naiadarchaeum* a (Candidatus)  
719 type genus of the order; *-ales* ending to denote the order; N.L. fem. pl. n. *Naiadarchaeales*  
720 the *Naiadarchaeum* order)

721 The order is circumscribed based on concatenated protein phylogeny and rank normalisation  
722 approach as per Parks et al., (2018). The description is the same as that of its sole genus and species. Type  
723 genus is *Candidatus* Naiadarchaeum.

724 -----

725 *Candidatus* Undinarchaeaceae (Un.din.ar.chae.a.ce'ae. N.L. neut. n. *Undinarchaeum* a  
726 (Candidatus) type genus of the family; *-aceae* ending to denote the family; N.L. fem. pl. n.  
727 *Undinarchaeaceae* the *Undinarchaeum* family)

728 The family is circumscribed based on concatenated protein phylogeny and rank normalisation  
729 approach as per Parks et al., (2018). The description is the same as that of its sole genus and species. Type  
730 genus is *Candidatus* Undinarchaeum.

731 *Candidatus* Undinarchaeales (Un.din.ar.chae.a'les. N.L. neut. n. *Undinarchaeum* a (Candidatus)  
732 type genus of the order; *-ales* ending to denote the order; N.L. fem. pl. n. *Undinarchaeales*  
733 the *Undinarchaeum* order)

734 The order is circumscribed based on concatenated protein phylogeny and rank normalisation  
735 approach as per Parks et al., (2018). The description is the same as that of its sole genus and species. Type  
736 genus is *Candidatus* Undinarchaeum.

737 *Candidatus* Undinarchaeia (Un.din.ar.chae'i.a. N.L. neut. n. *Undinarchaeum* a (Candidatus) type  
738 genus of the order of the class; *-ia* ending to denote the class; N.L. fem. pl. n. *Undinarchaeia*  
739 the *Undinarchaeum* class)

740 The class is circumscribed based on concatenated protein phylogeny and rank normalisation  
741 approach as per Parks et al., (2018). The description is the same as that of its sole and type  
742 order *Candidatus* Undinarchaeales.

743 *Candidatus* Undinarchaeota (Un.din.ar.chae.o'ta. N.L. neut. n. *Undinarchaeum* a (Candidatus)  
744 type genus of the class of the phylum; *-ota* ending to denote the phylum; N.L. neut. pl. n. *Undinarchaeota*  
745 the *Undinarchaeum* phylum)

746 The phylum is circumscribed based on concatenated protein phylogeny and rank normalisation  
747 approach as per Parks et al., (2018). The description is the same as that of its sole and type  
748 class *Candidatus* Undinarchaeia.

749



# Supplementary Figures

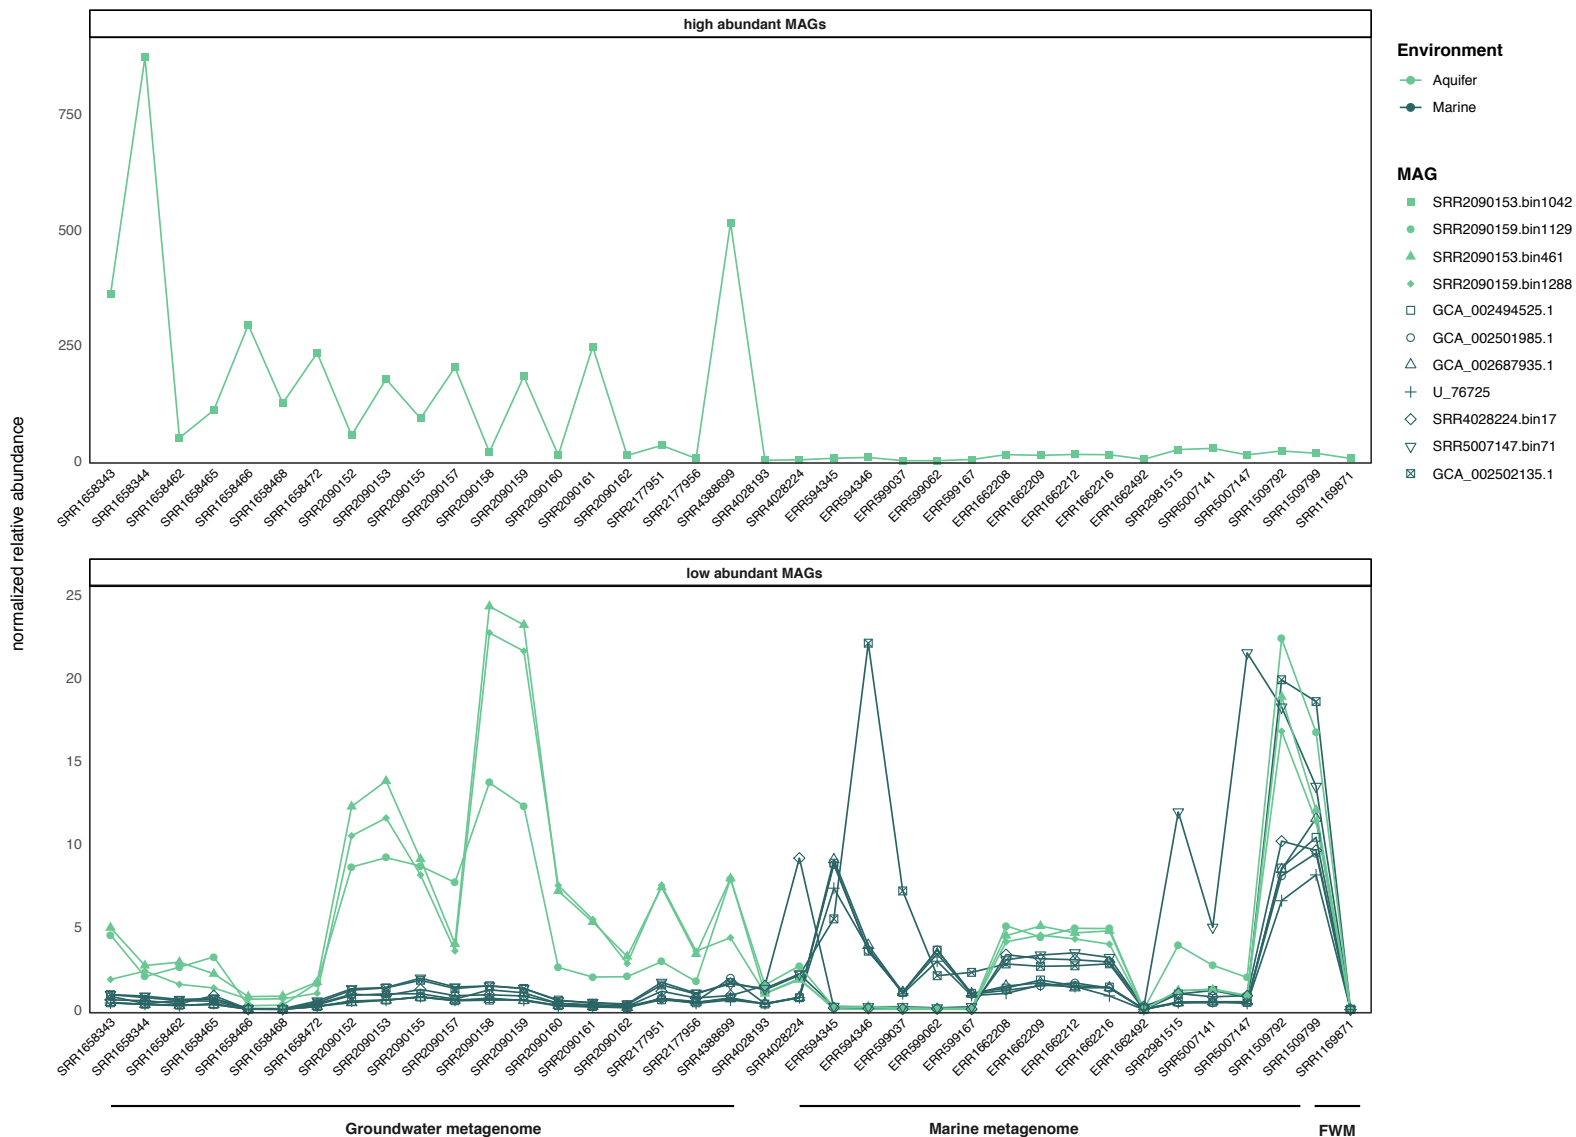

**Supplementary Figure 1 | Abundance of Undinarchaota (UAP2) across 37 metagenomic datasets.** Normalized relative abundance of aquifer Naiadarchaeales (light green) and marine Undinarchaeales (dark green) across 37 metagenomes. Relative abundances were normalized by the total number of reads per sample. Read mapping was done to metagenomes belonging to different environmental types including groundwater, marine and freshwater metagenomes (FWM). Due to the difference in abundance, MAGs with a relative abundance >50 were plotted separately. Details on the metagenomes can be found in Supplementary Data 1.

**a**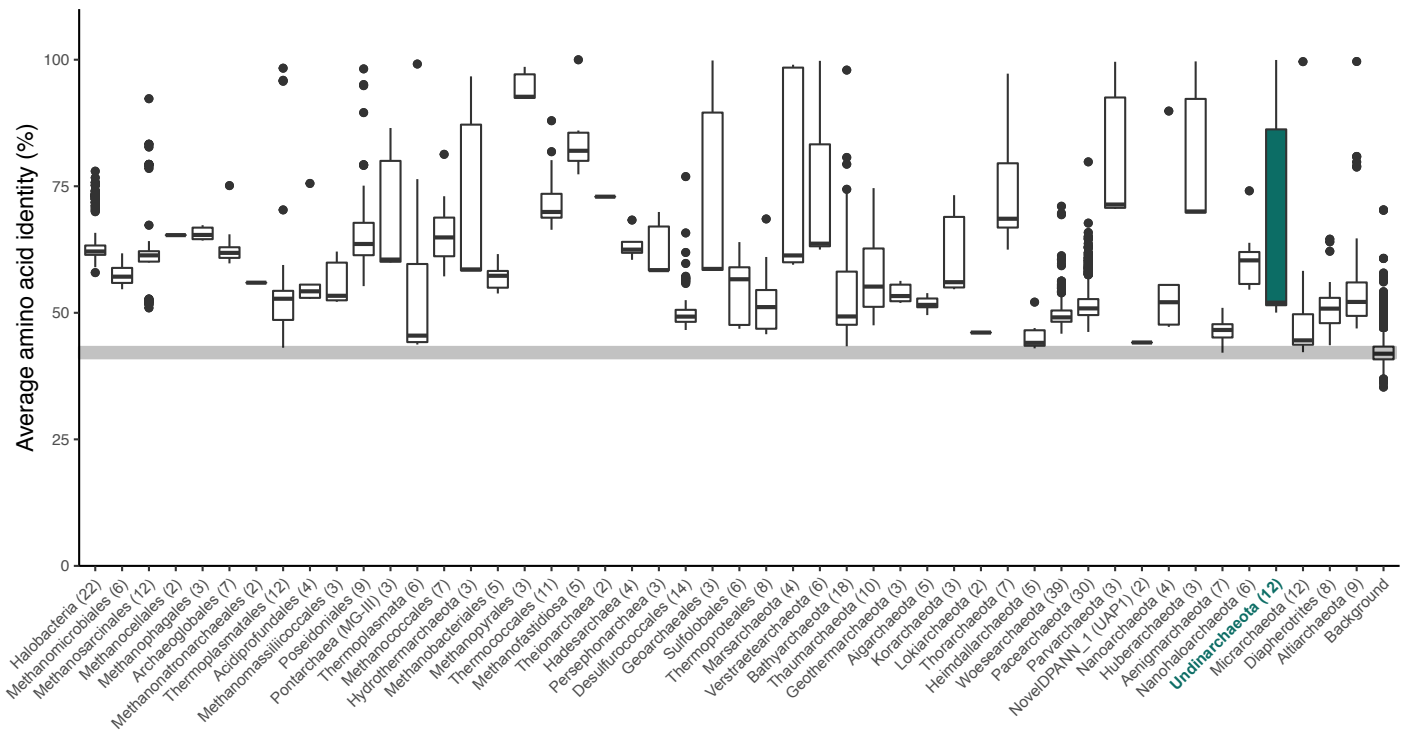**b**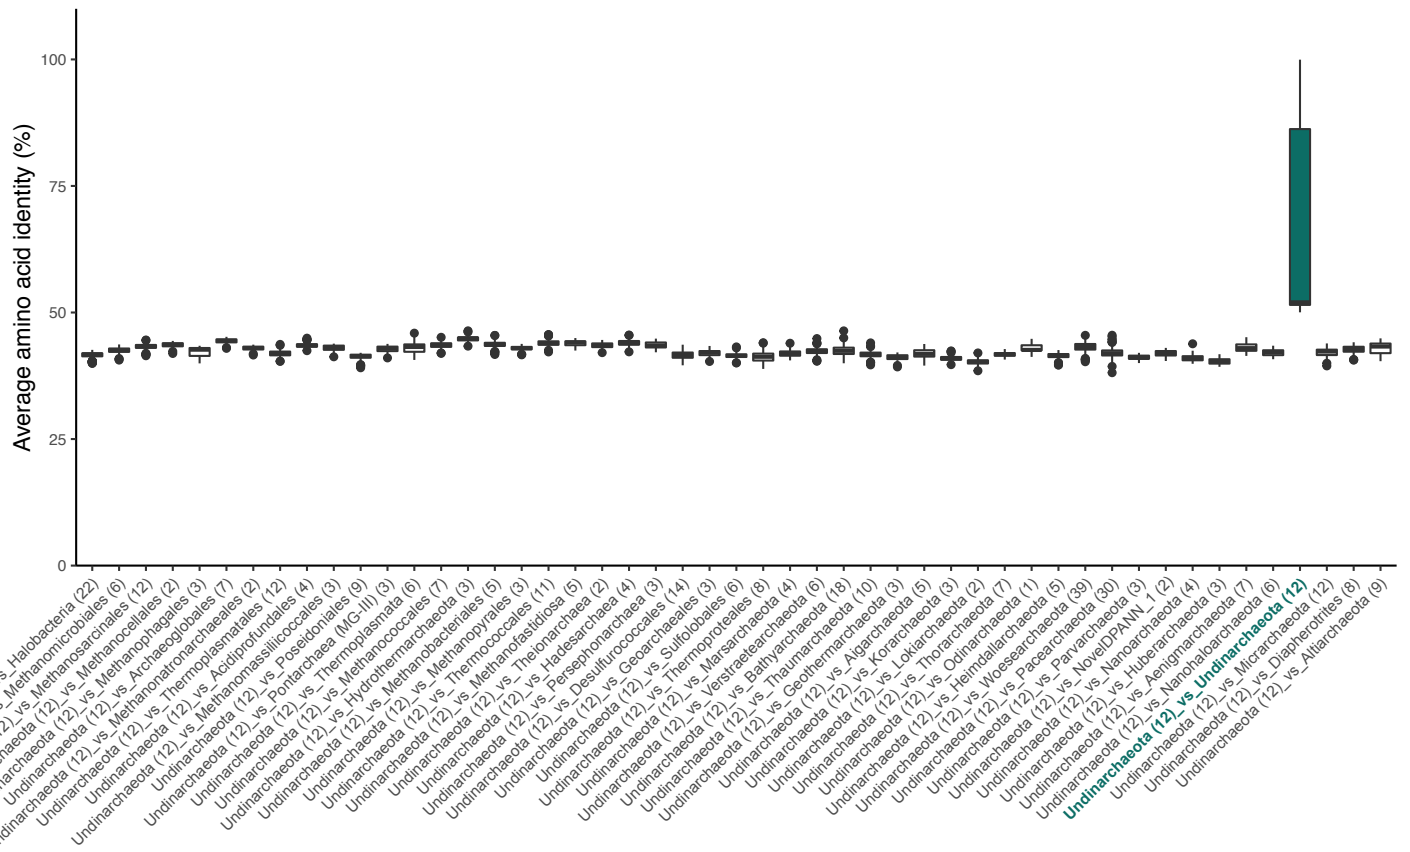

**Supplementary Figure 2 | Comparing the amino acid identity (AAI) of major archaeal lineages.** **a**, Shared AAI across archaeal lineages. Background: Comparing all archaeal lineages included in the analyses but excluding archaea belonging to the same lineages in order to determine the lowest AAI that defines a cluster. **b**, AAI of Undinarchaeota compared to all other archaeal lineages to show that the highest identity is when comparing Undinarchaeota to themselves. The lower and upper hinges of the boxplot correspond to the first and third quartiles. The upper/lower whiskers extend from the hinge to the largest/smallest value no further than  $1.5 \times$  of the inter-quartile range. Data beyond the whiskers are shown as individual data points. Number in parentheses: Number of genomes included in each cluster. Raw values are listed in Supplementary Data 3.

364 species  
16S + 23S rRNA genes  
trimmed alignment (TRIMAL)  
4,462 bp alignment  
Iqtree,GTR+G

TACK + Asgard

Nanoarchaeota

Euryarchaeota

DPANN

Undinarchaeota

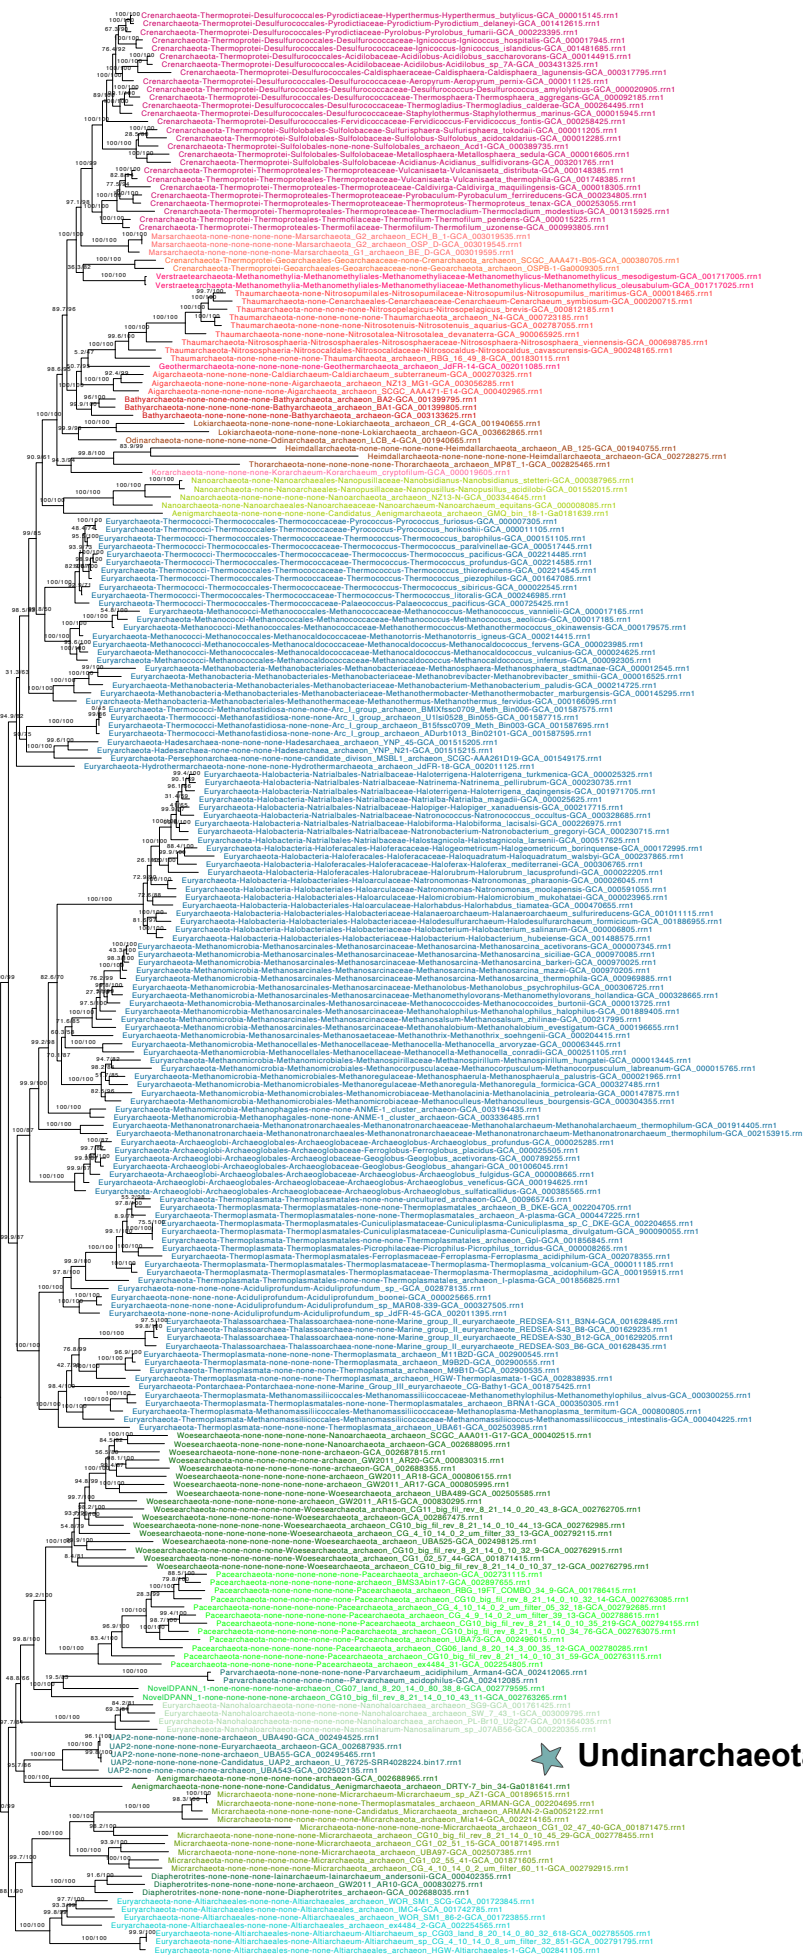

Supplementary Figure 3 Phylogenetic placement of Undinarchaeota based on a concatenated alignment of the 16S and 23S rRNA gene sequences. Sequences were extracted from the 364 species set (of these 238 species encoded 16S and/or 23 rRNA genes). The alignment was trimmed using TRIMAL (alignment length = 4,462 bp) and a maximum-likelihood phylogenetic tree was inferred with the GTR+G model with an ultrafast bootstrap approximation (left) and SH-like approximate likelihood tests (right), each run with 1000 replicates. Scale bar: Average number of substitutions per site. The tree was artificially rooted

364 species  
16S + 23S rRNA genes  
trimmed alignment (BMGE)  
3,128 bp alignment  
Iqtree, GTR+G

TACK + Asgard

Nanoarchaeota

Euryarchaeota

DPANN

### ★ Undinarchaeota

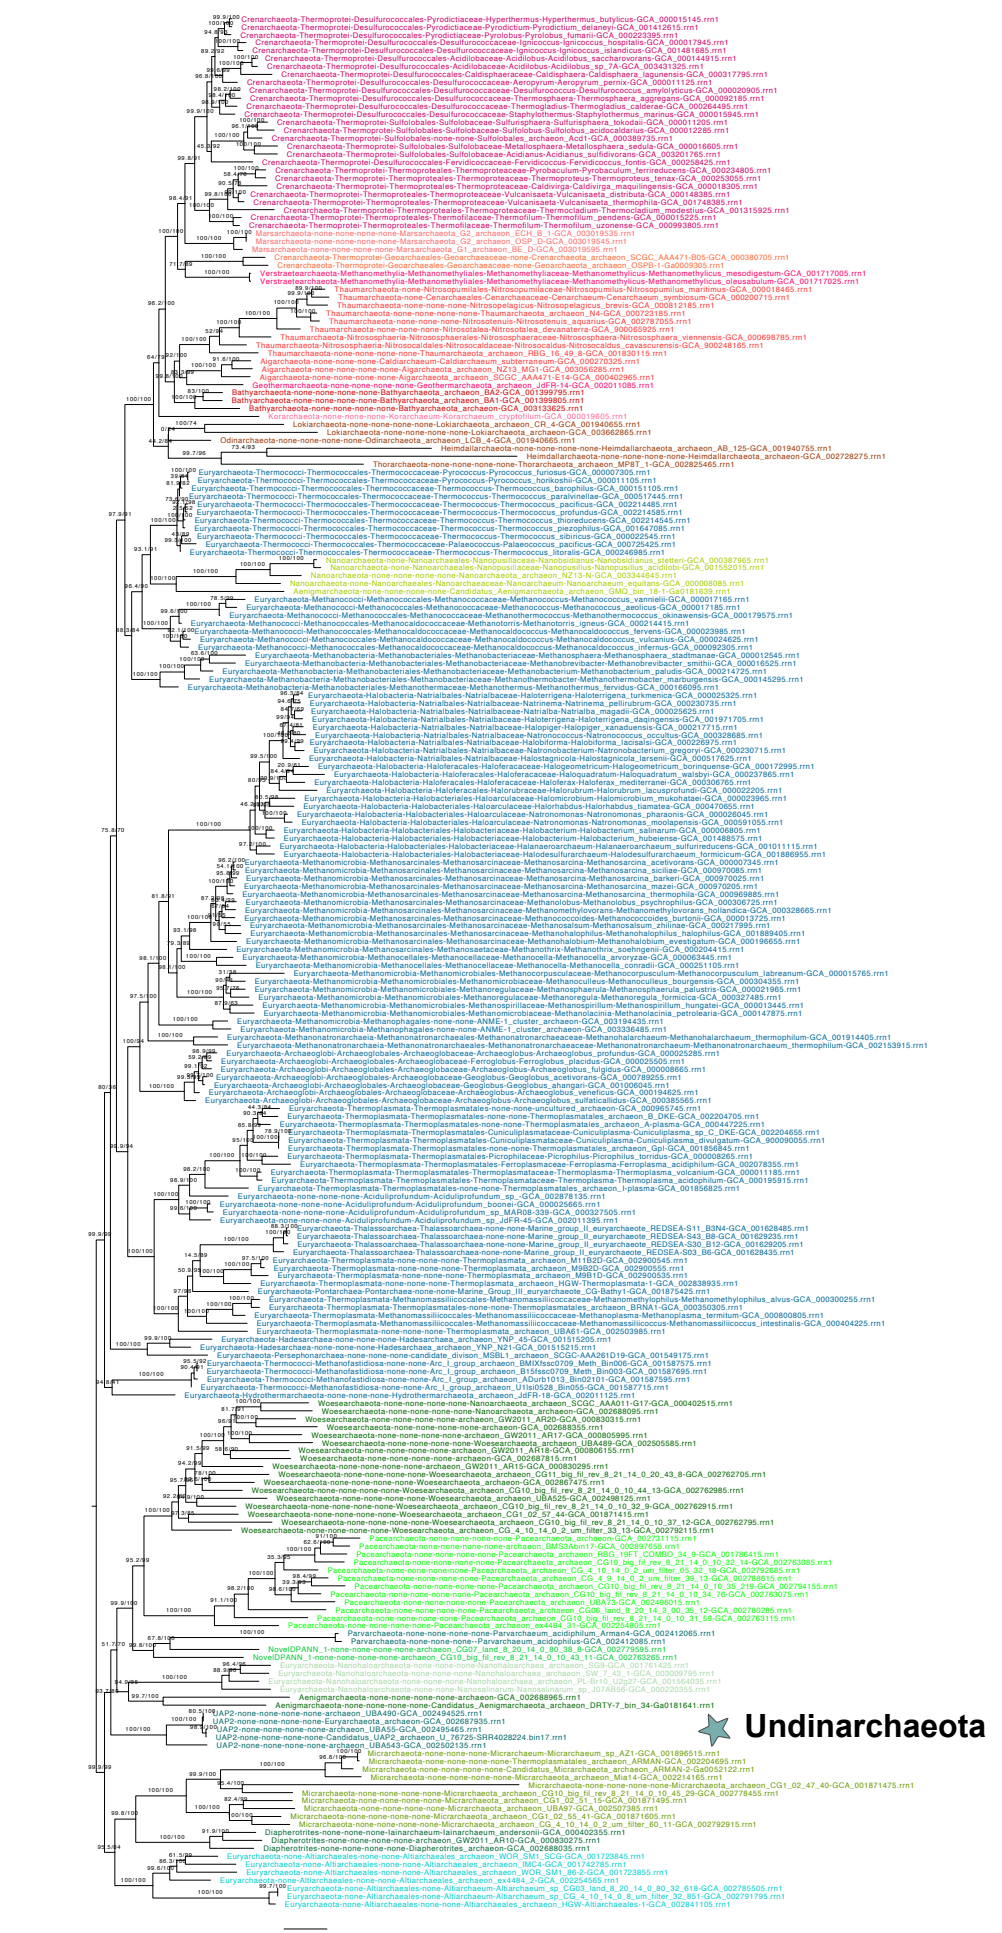

Supplementary Figure 4 Phylogenetic placement of Undinarchaeota based on a concatenated alignment of the 16S and 23S rRNA gene sequences. Sequences were extracted from the 364 species set (of these 238 species encoded 16S and/or 23 rRNA genes). The alignment was trimmed using BMGE (alignment length = 3,128 bp) and a maximum-likelihood phylogenetic tree was inferred with the GTR+G model with an ultrafast bootstrap approximation (left) and SH-like approximate likelihood tests (right), each run with 1000 replicates. Scale bar: Average number of substitutions per site. The tree was artificially rooted using DPANN archaea.



364 species  
 16S + 23S rRNA genes  
 trimmed alignment (TRIMAL)  
 Removal of heterogeneous sites  
 Pruner, 10% site removal  
 4,016 bp alignment  
 Iqtree, GTR+G

TACK + Asgard

Nanoarchaeota

Euryarchaeota

DPANN

Undinarchaeota

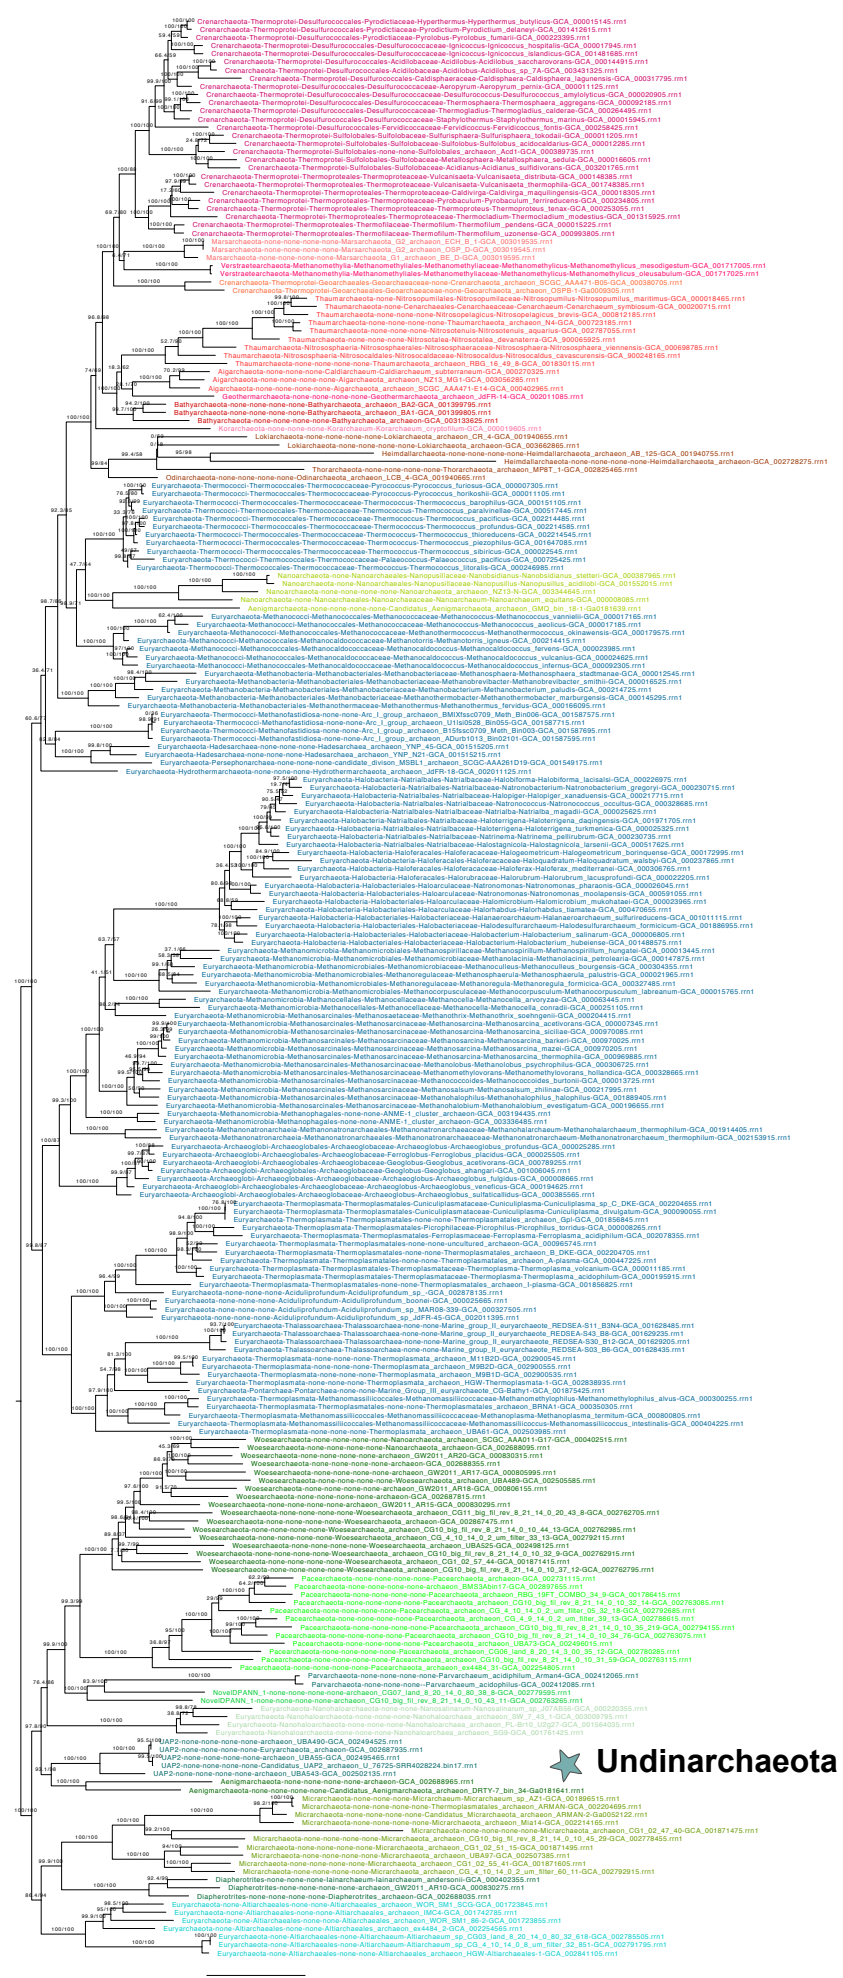

**Supplementary Figure 5 | Phylogenetic placement of Undinarchaeota based on a concatenated alignment of the 16S and 23S rRNA gene sequences.** Sequences were extracted from the 364 species set (of these 238 species encoded 16S and/or 23 rRNA genes). The alignment was trimmed using TRIMAL and 10% of the most heterogeneous sites were removed using an alignment pruner (alignment length = 4,016 bp). A maximum likelihood phylogenetic tree was inferred with the GTR+G model with an ultrafast bootstrap approximation (left) and SH-like approximate likelihood tests (right), each run with 1000 replicates. Scale bar: Average number of substitutions per site. The tree was artificially rooted using DPANN archaea.

**a**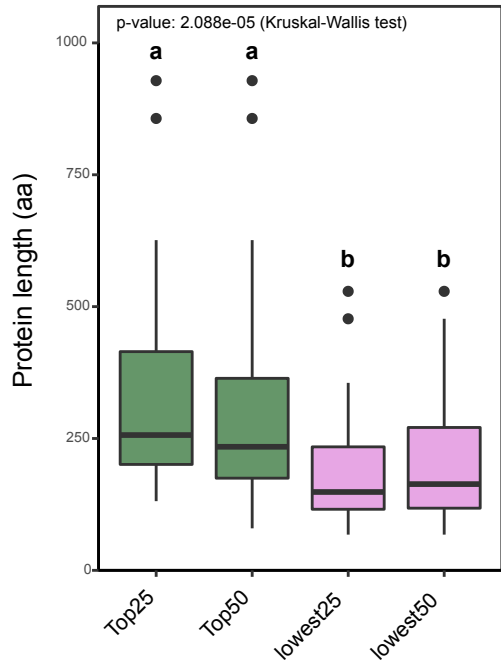**b**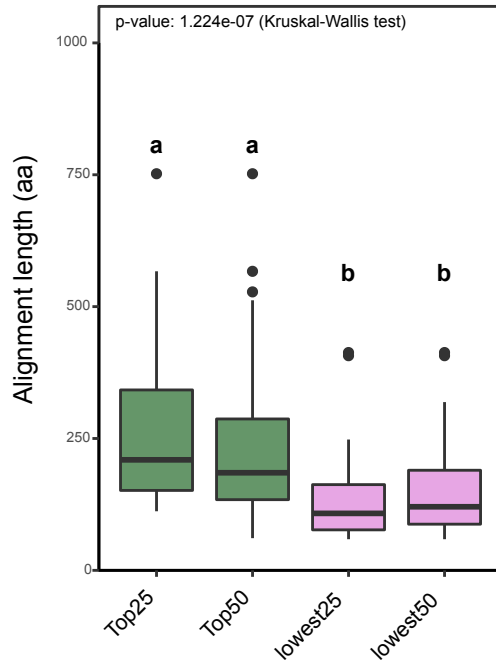**c**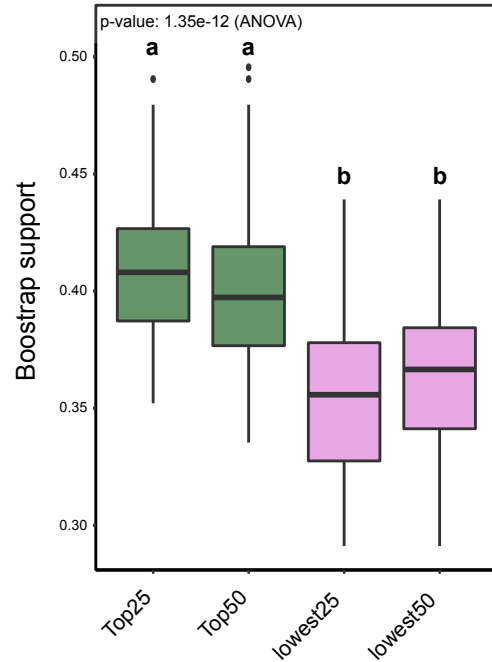

**Supplementary Figure 6 | Statistics of the 151 marker proteins.** Average protein length (a), average alignment length (b) and average bootstrap support (c) for the lowest 25%, lowest 50%, top 25% and 50% top ranking marker proteins extracted from the 364 taxa set. The boxplot shows the median, the two hinges corresponding to the first and third quartiles and the whiskers correspond to the 1.5x interquartile range from the hinge as well as all individual points beyond the whiskers. Significance letters: Significant differences between groups were determined by a two-sided Dunn's Kruskal-Wallis Multiple Comparisons test (a,b) or a two-sided Tukey's HSD ( $p < 0.05$ ) (c). Normality was assessed using the Shapiro-Wilk test.  $n = 28$  and  $56$  for the 25% best/worst and 50% best/worst marker sets, respectively.

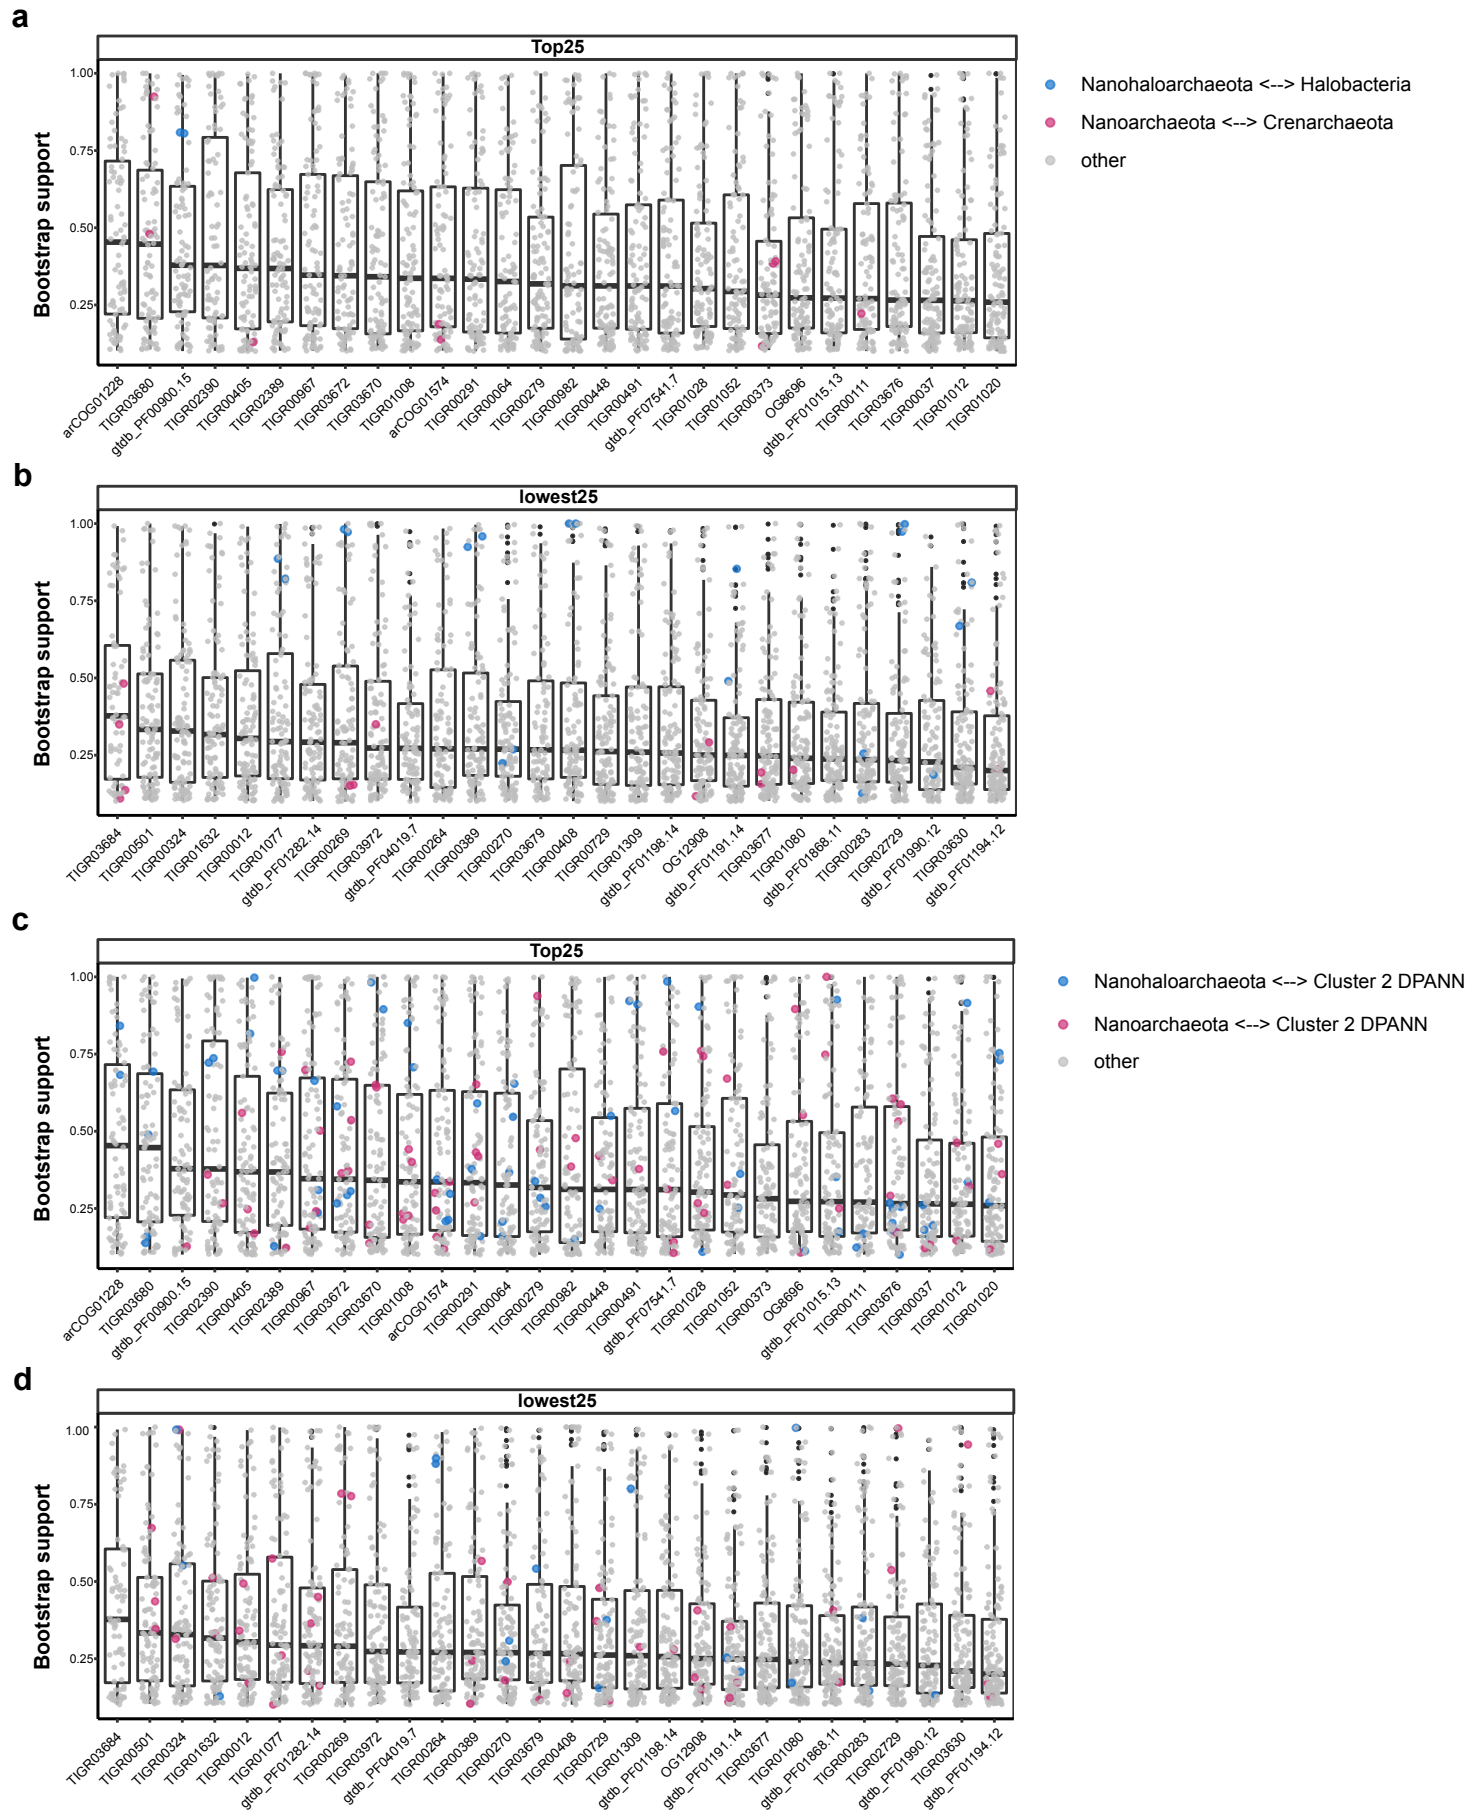

**Supplementary Figure 7 | Bootstrap support for archaeal clades of interest within the 151 marker proteins.** Distribution of bootstrap supports on individual trees from the lowest 25% and 25% top ranking marker proteins extracted from the 364 taxa set. **a,b,** Highlighted in color is the support between potential HGTs between Nanohaloarchaeota and Halobacteria and Nanoarchaeota and Crenarchaeota. **c,d,** Highlighted in color is the support between Nanohaloarchaeota and Nanoarchaeota and Cluster 2 DPANN archaea. The boxplot shows the median, the two hinges corresponding to the first and third quartiles and the whiskers correspond to the 1.5x interquartile range from the hinge as well as all individual points beyond the whiskers.

364 species  
 25% top ranked proteins (n=28)  
 trimmed alignment (BMGE)  
 7,442 amino acids  
 Iqtree, LG+C60+F+R

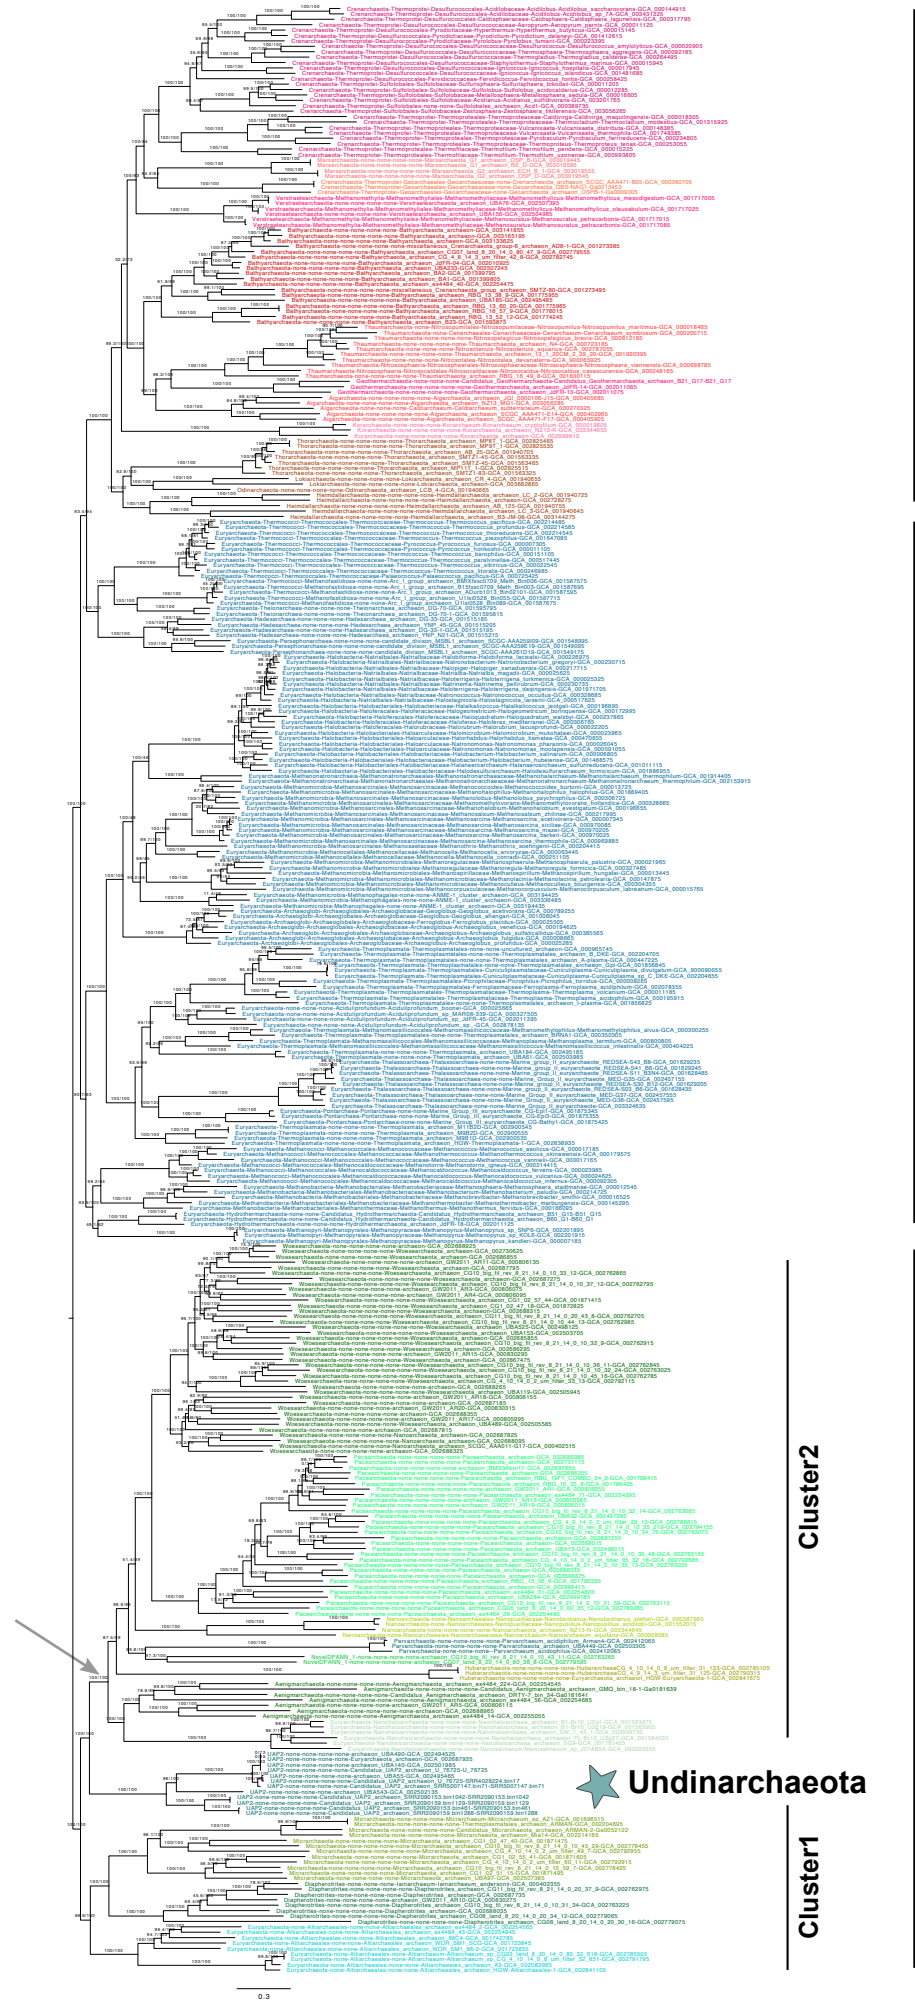

TACK + Asgard

Euryarchaeota

Cluster2

DPANN

Cluster1

★ Undinararchaeota

**Supplementary Figure 8 | Phylogenetic placement of Undinararchaeota based on an alignment generated with the 25% top ranked proteins (n=28) and the 364 species set.** The alignment was trimmed with BMGE (alignment length = 7,422 aa). A ML phylogenetic tree was inferred with the LG+C60+F+R model with an ultrafast bootstrap approximation (left) and SH-like approximate likelihood tests (right), each run with 1000 replicates. The tree was artificially rooted with DPANN archaea and the grey arrow shows the root position inferred with minimal ancestor deviation rooting (Tria et al., 2017). Scale bar: Average number of substitutions per site. Tree statistics for tree number 1 can be found in Supplementary Data 6.







364 species  
 50% top ranked proteins (n=56)  
 trimmed alignment (BMGE)  
 12,849 amino acids  
 Iqtree, LG+C60+F+R

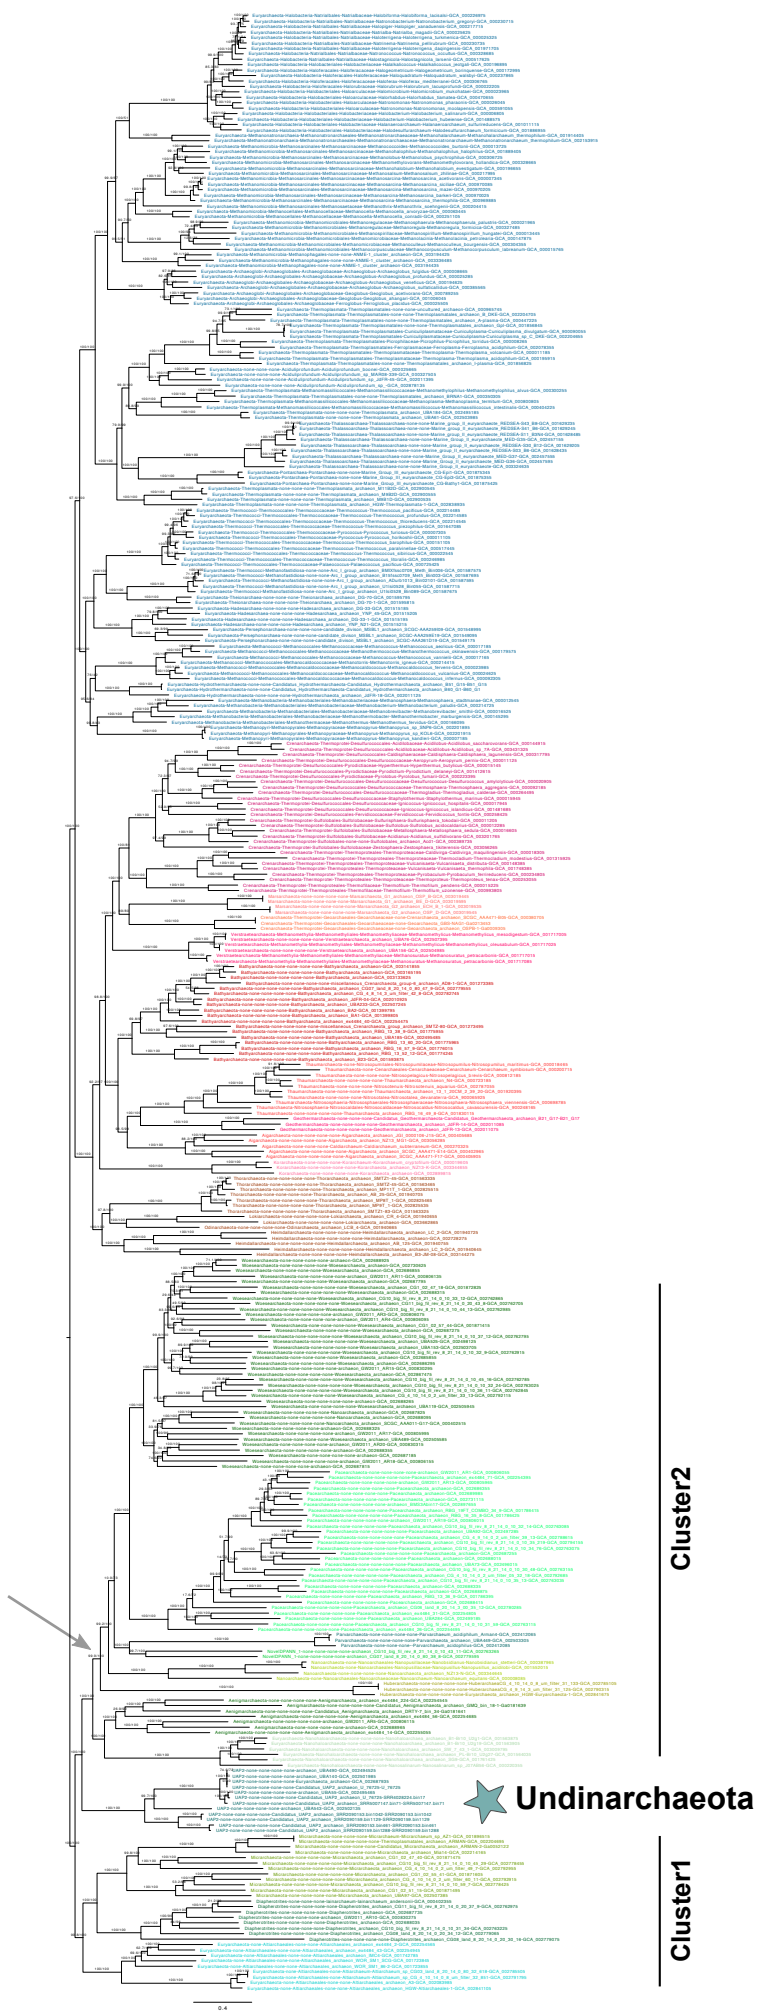

Euryarchaeota

TACK + Asgard

Cluster2

DPANN

★ Undinarchaeota

Cluster1

**Supplementary Figure 11 | Phylogenetic placement of Undinarchaeota based on an alignment generated with the 50% top ranked proteins (n=56) and the 364 species set.** The alignment was trimmed with BMGE (alignment length = 12,849 aa). A ML phylogenetic tree was inferred with the LG+C60+F+R model with an ultrafast bootstrap approximation (left) and SH-like approximate likelihood tests (right), each run with 1000 replicates. The tree was artificially rooted with the DPANN archaea and the grey arrow shows the root position inferred with minimal ancestor deviation rooting (Tria et al., 2017). Scale bar: Average number of substitutions per site. Tree statistics for tree number 4 can be found in Supplementary Data 6.

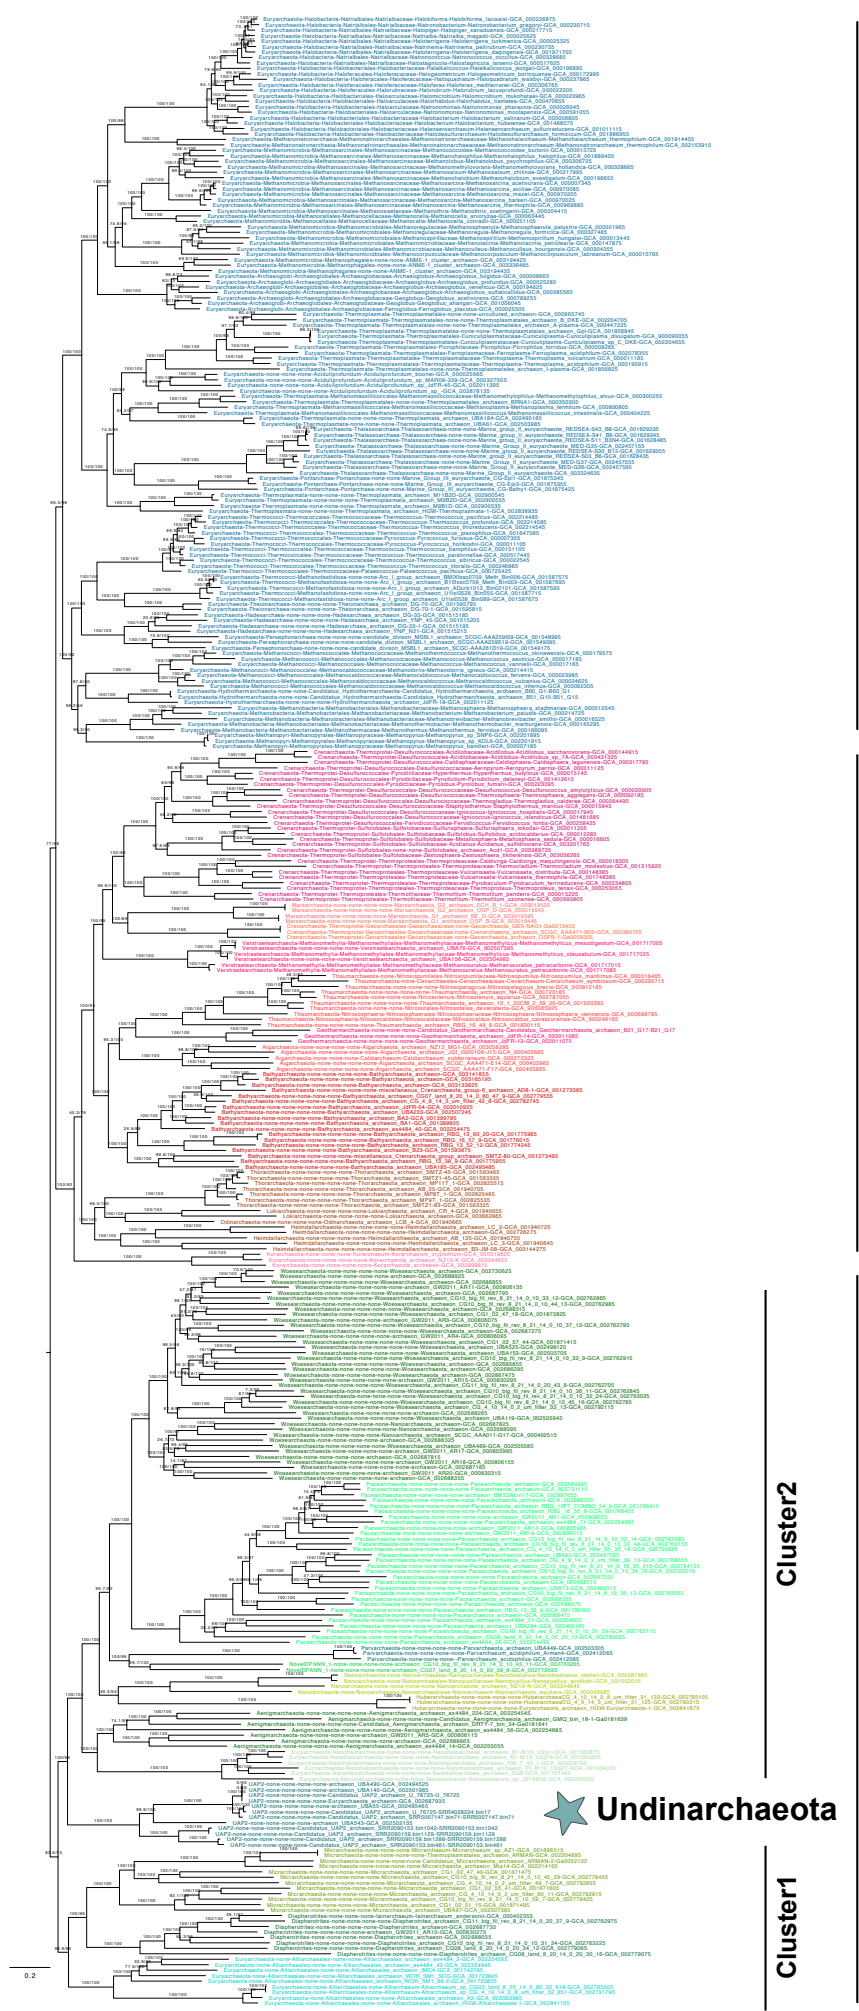

364 species  
 50% top ranked proteins (n=56)  
 trimmed alignment (BMGE)  
 12,849 amino acids  
 Iqtree,  
 LG MFP+MERGE followed by  
 NONREV

Euryarchaeota

TACK + Asgard

Cluster2

DPANN

★ Undinarchaeota

Cluster1

**Supplementary Figure 12 | Phylogenetic placement of Undinarchaeota based on an alignment generated with the 50% top ranked (n=56) and the 364 species set.** The alignment was trimmed with BMGE (alignment length = 12,849 aa). An initial ML phylogenetic tree was inferred with the LG model (-m MFP +MERGE) followed by a tree generated with a non-reversible model with an ultrafast bootstrap approximation (left) and SH-like approximate likelihood tests (right), each run with 1000 replicates. The tree was rooted using the non-reversible model. Scale bar: Average number of substitutions per site. Tree statistics for tree number 5 can be found in Supplementary Data 6.



364 species  
 50% top ranked proteins (n=56)  
 trimmed alignment (BMGE)  
 12,849 amino acids  
 Iqtree, NONREV model

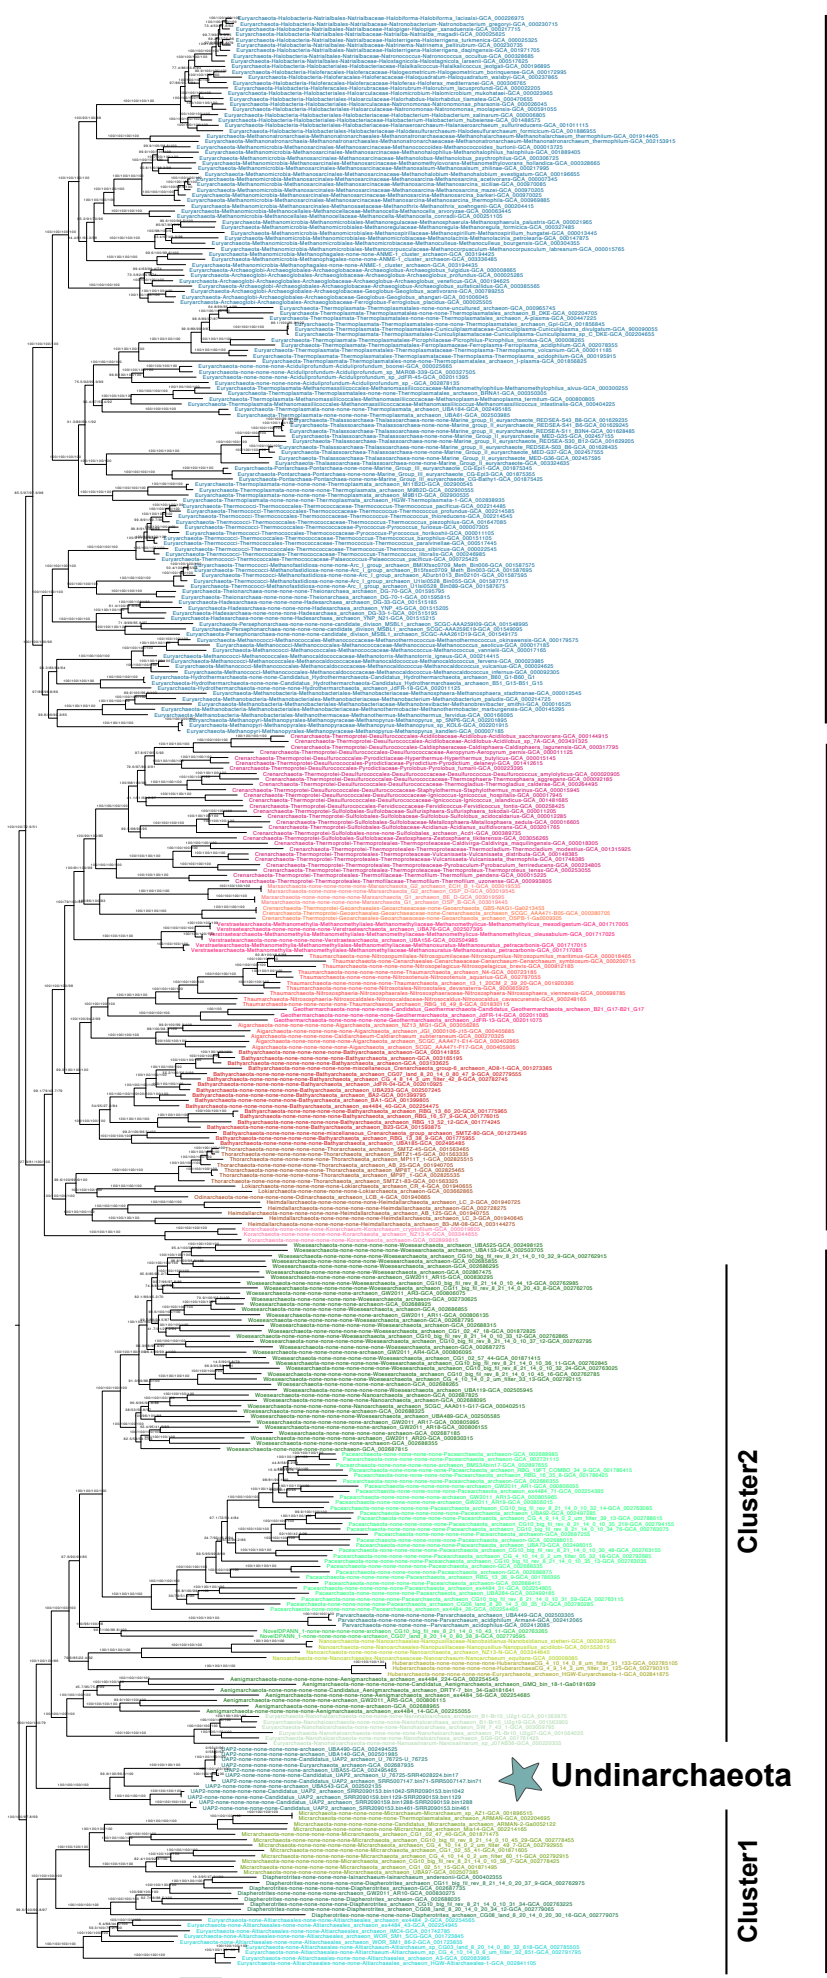

Euryarchaeota

TACK + Asgard

DPANN

Cluster 2

Cluster 1

★ Undinarchaeota

**Supplementary Figure 13 | Phylogenetic placement of Undinarchaeota based on an alignment generated with the 50% top ranked proteins (n=56) and the 364 species set.** The alignment was trimmed with BMGE (alignment length = 12,849 aa). A ML phylogenetic tree was inferred with the NONREV model. The first two values show the support for the reversible and the second two for the non-reversible model. Values 1 and 3 were generated with an ultrafast bootstrap approximation and 2 and 4 with an SH-like approximate likelihood tests, each run with 1000 replicates. The tree was rooted using the non-reversible model in iqtree v2. Scale bar: Average number of substitutions per site. Tree statistics for tree number 6 can be found in Supplementary Data 6.

364 species  
 50% top ranked proteins (n=56)  
 trimmed alignment (BMGE)  
 SR4 decoded  
 12,849 amino acids  
 Iqtree, C60SR4

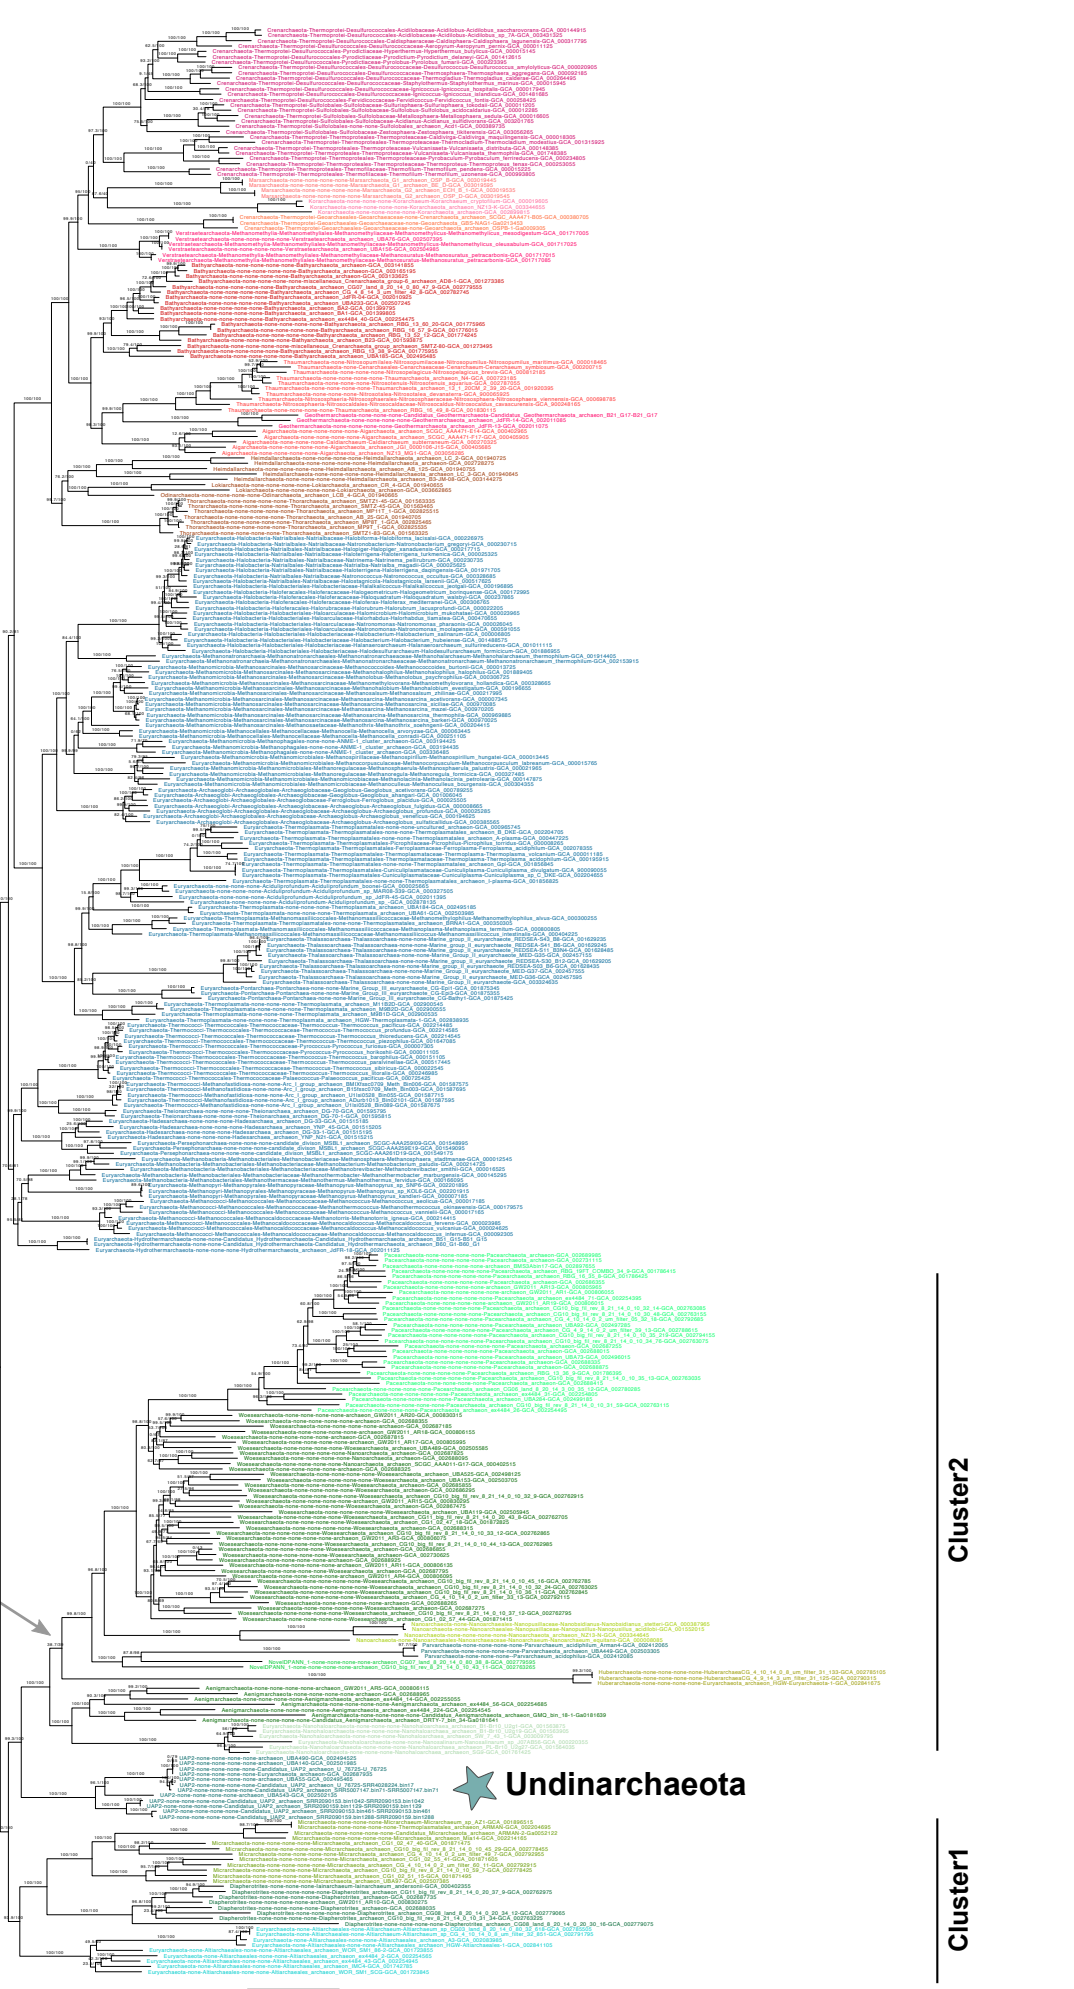

TACK + Asgard

Euryarchaeota

Cluster2

DPANN

Cluster1

★ Undinarchaeota

**Supplementary Figure 14 | Phylogenetic placement of Undinarchaeota based on an alignment generated with the 50% top ranked proteins (n=56) and the 364 species set.** The alignment was trimmed with BMGE and decoded into 4 character states (SR4 decoding; alignment length = 12,849 characters). A ML phylogenetic tree was inferred with the C60-SR4 model with an ultrafast bootstrap approximation (left) and SH-like approximate likelihood tests (right), each run with 1000 replicates. The tree was artificially rooted with the DPANN archaea and the grey arrow shows the root position inferred with minimal ancestor deviation rooting (Tria et al., 2017). Scale bar: Average number of substitutions per site. Tree statistics for tree number 7 can be found in Supplementary Data 6.

364 species  
 50% top ranked proteins (n=56)  
 removal of fast-evolving sites:  
 SlowFaster, 10% site removal  
 11,585 amino acids  
 Iqtree, LG+C60+F+R

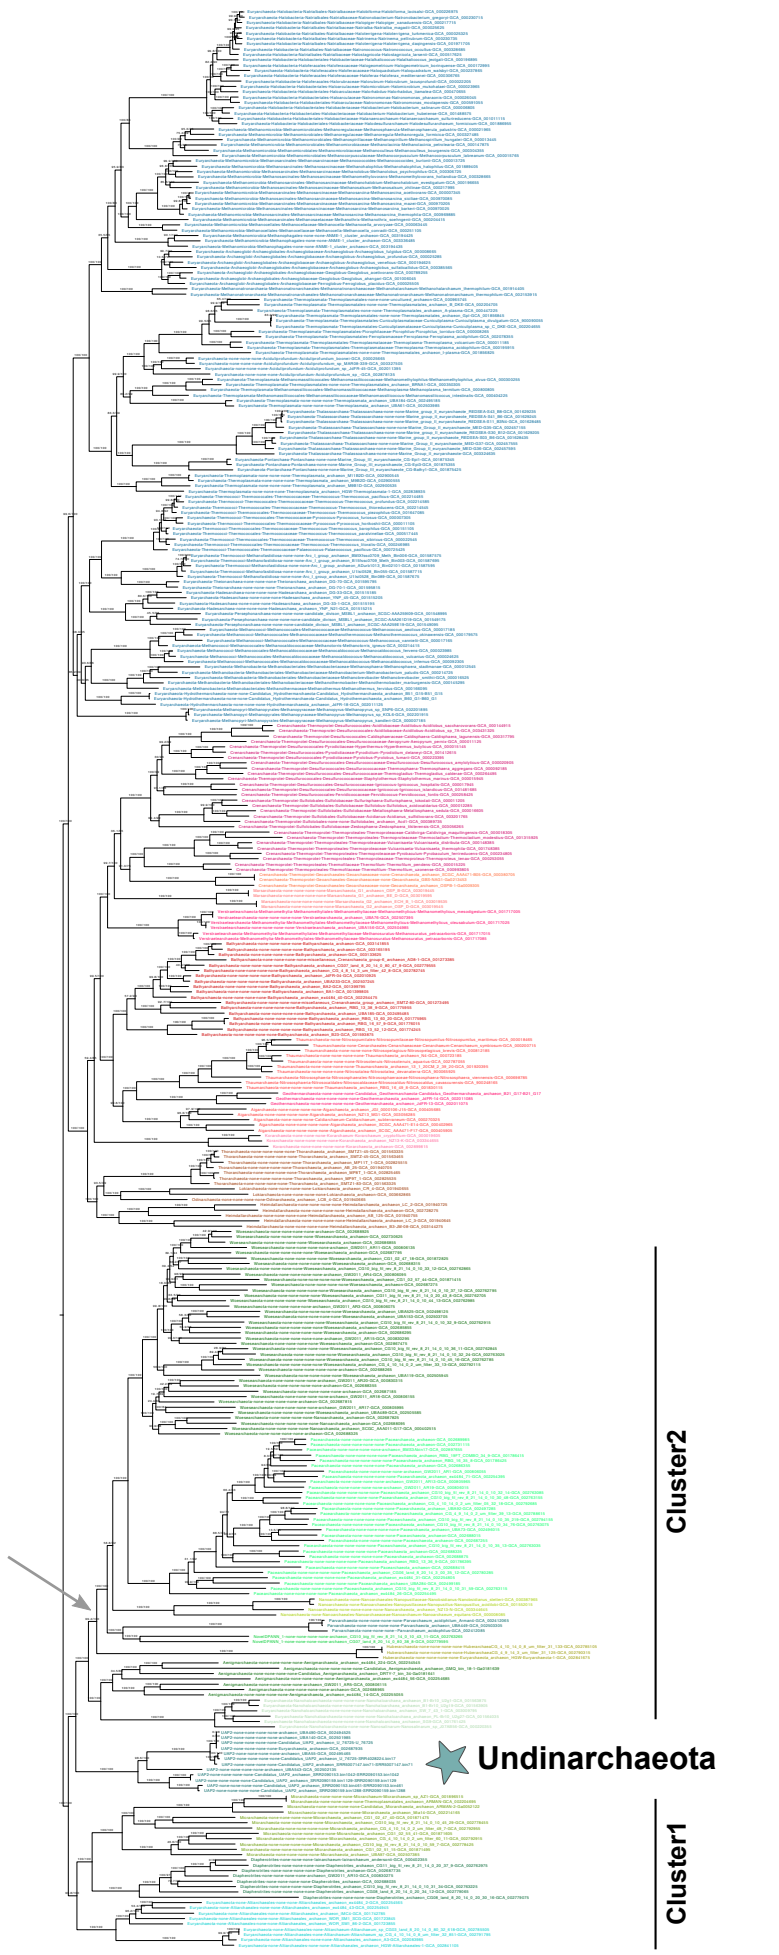

Euryarchaeota

TACK + Asgard

Cluster2

DPANN

★ Undinarchaeota

Cluster1

**Supplementary Figure 15 | Phylogenetic placement of Undinarchaeota based on an alignment generated with the 50% top ranked proteins (n=56) and the 364 species set.** 10% of fast-evolving sites were removed from the alignment with SlowFaster (alignment length = 11,585 aa). A ML phylogenetic tree was inferred with the LG+C60+F+R model with an ultrafast bootstrap approximation (left) and SH-like approximate likelihood tests (right), each run with 1000 replicates. The tree was artificially rooted with the DPANN archaea and the grey arrow shows the root position inferred with minimal ancestor deviation rooting (Tria et al., 2017). Scale bar: Average number of substitutions per site. Tree statistics for tree number 8 can be found in Supplementary Data 6.

364 species  
 50% top ranked proteins (n=56)  
 removal of fast-evolving sites:  
 SlowFaster, 20% site removal  
 10,283 amino acids  
 Iqtree, LG+C60+F+R

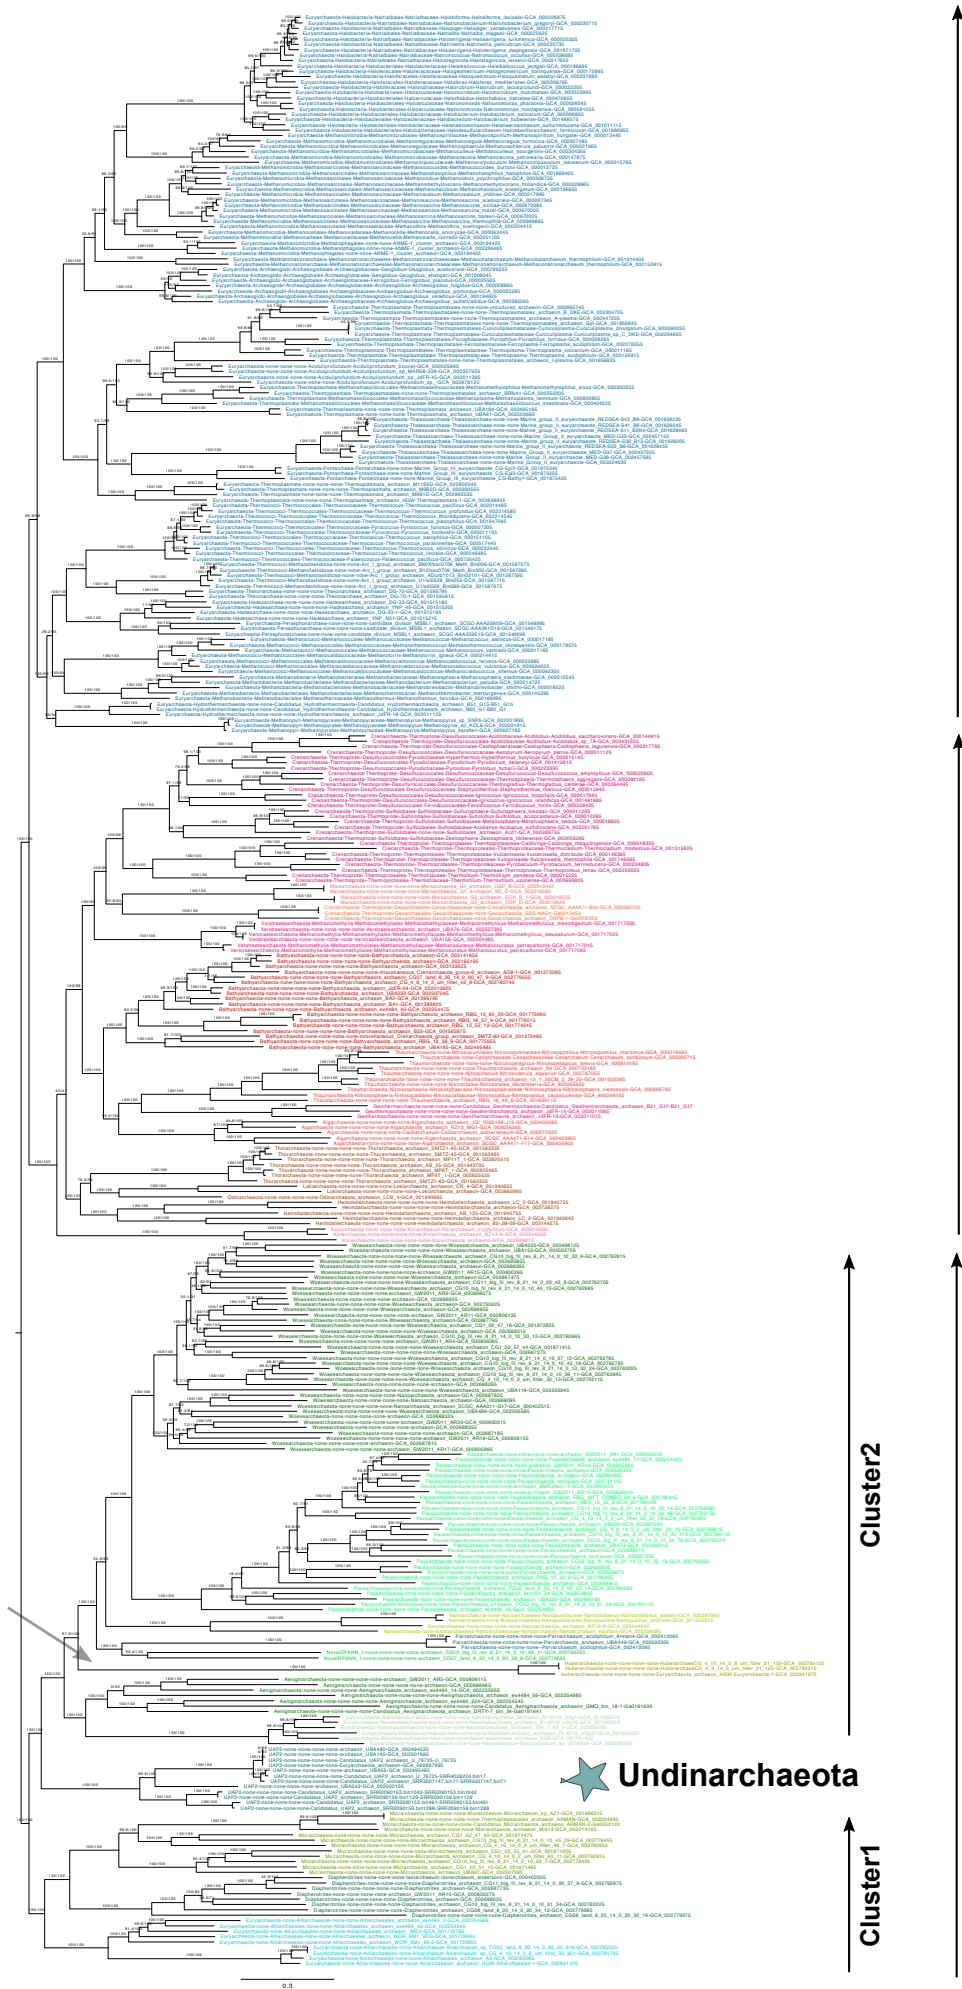

Euryarchaeota

TACK + Asgard

Cluster2

DPANN

★ Undinarchaeota

Cluster1

**Supplementary Figure 16 | Phylogenetic placement Undinarchaeota based on an alignment generated with the 50% top ranked proteins (n=56) and the 364 species set.** 20% of fast-evolving sites were removed from the alignment with SlowFaster (alignment length = 10,283 aa). A ML phylogenetic tree was inferred with the LG+C60+F+R model with an ultrafast bootstrap approximation (left) and SH-like approximate likelihood tests (right), each run with 1000 replicates. The tree was artificially rooted with the DPANN archaea and the grey arrow shows the root inferred with minimal ancestor deviation (Tria et al., 2017). Scale bar: Average number of substitutions per site. Tree statistics for tree number 9 can be found in Supplementary Data 6.



364 species  
 50% top ranked proteins (n=56)  
 removal of fast-evolving sites:  
 SlowFaster, 30% site removal  
 9,031 amino acids  
 Iqtree, LG+C60+F+R

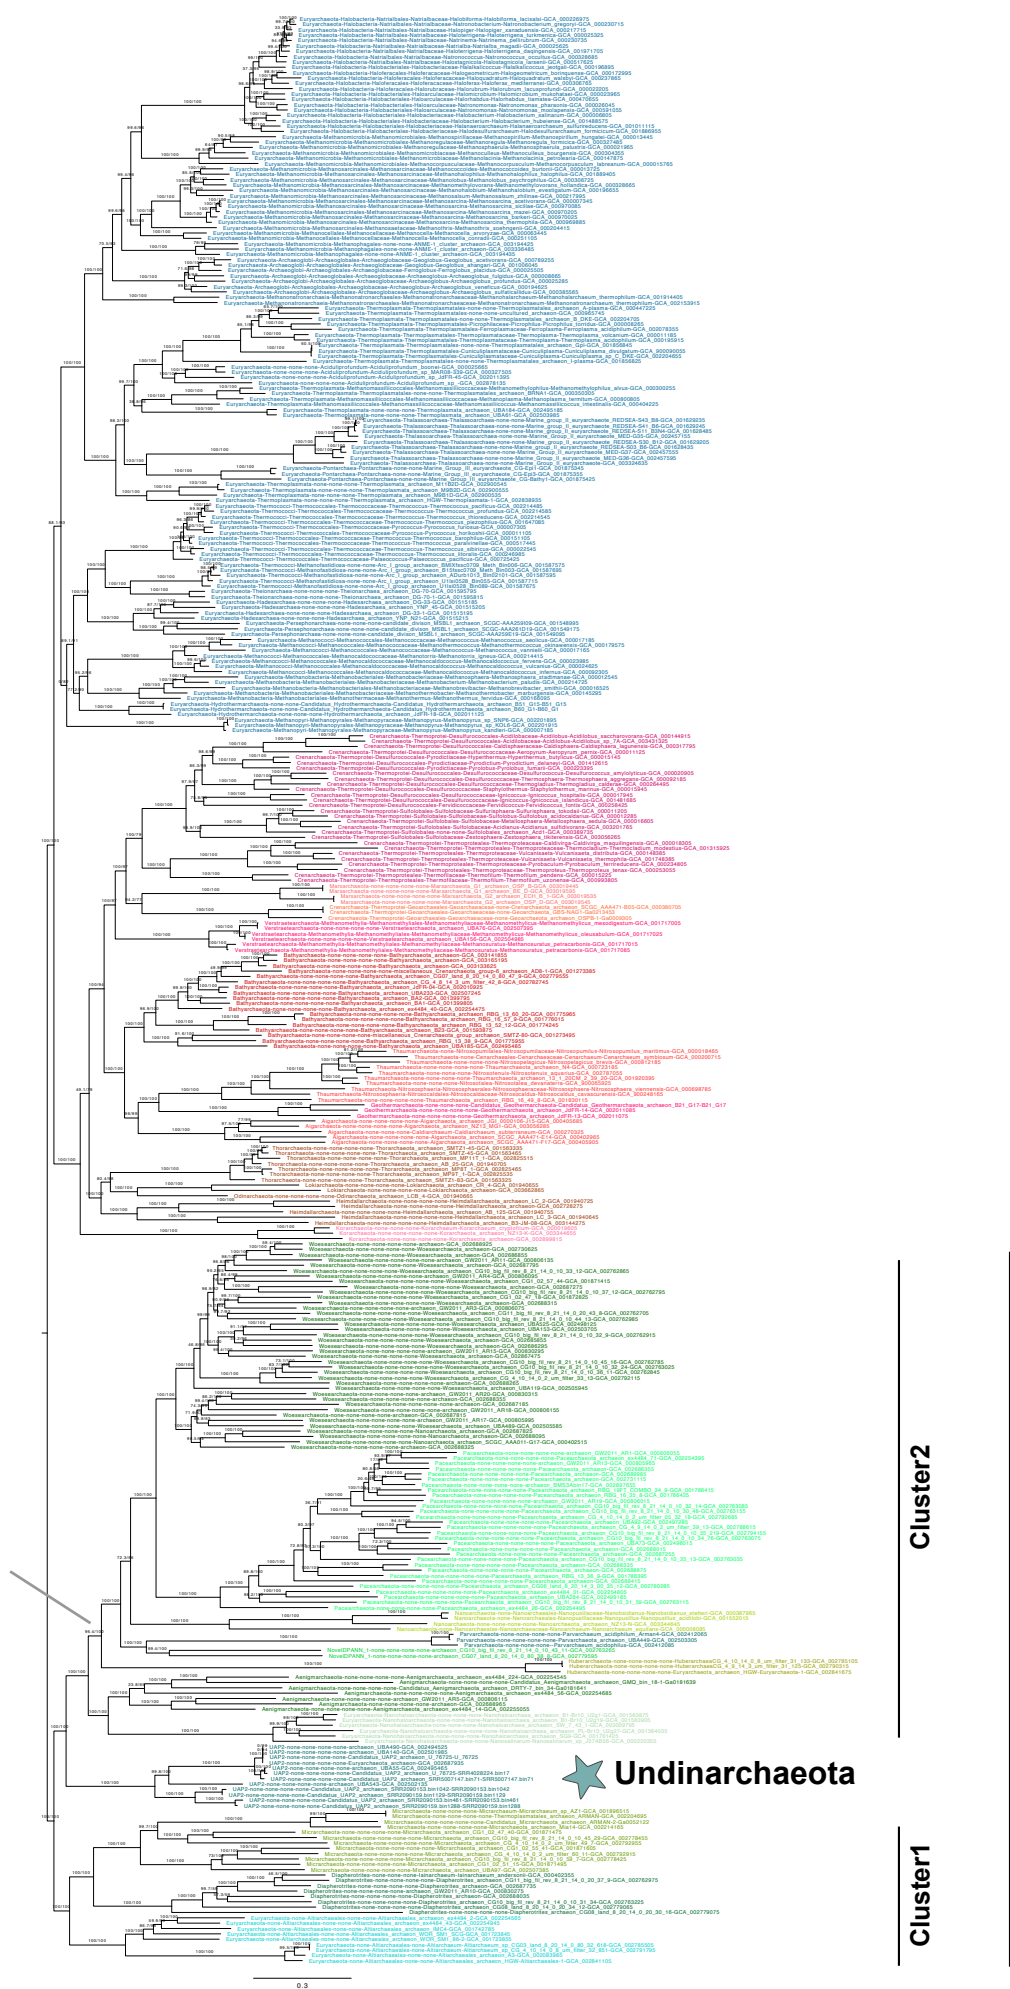

Euryarchaeota

TACK + Asgard

Cluster2

DPANN

Cluster1

★ Undinarchaeota

**Supplementary Figure 17 | Phylogenetic placement of Undinarchaeota based on an alignment generated with the 50% top ranked proteins (n=56) and the 364 species set.** 30% of fast-evolving sites were removed from the alignment with SlowFaster (alignment length = 9,031 aa). A ML phylogenetic tree was inferred with the LG+C60+F+R model with an ultrafast bootstrap approximation (left) and SH-like approximate likelihood tests (right), each run with 1000 replicates. The tree was artificially rooted with the DPANN archaea and the grey arrow shows the root position inferred with minimal ancestor deviation (Tria et al., 2017). Scale bar: Average number of substitutions per site. Tree statistics for tree number 10 can be found in Supplementary Data 6.

364 species  
 50% top ranked proteins (n=56)  
 removal of fast-evolving sites  
 SlowFaster, 40% site removal  
 7,651 amino acids  
 Iqtree, LG+C60+F+R

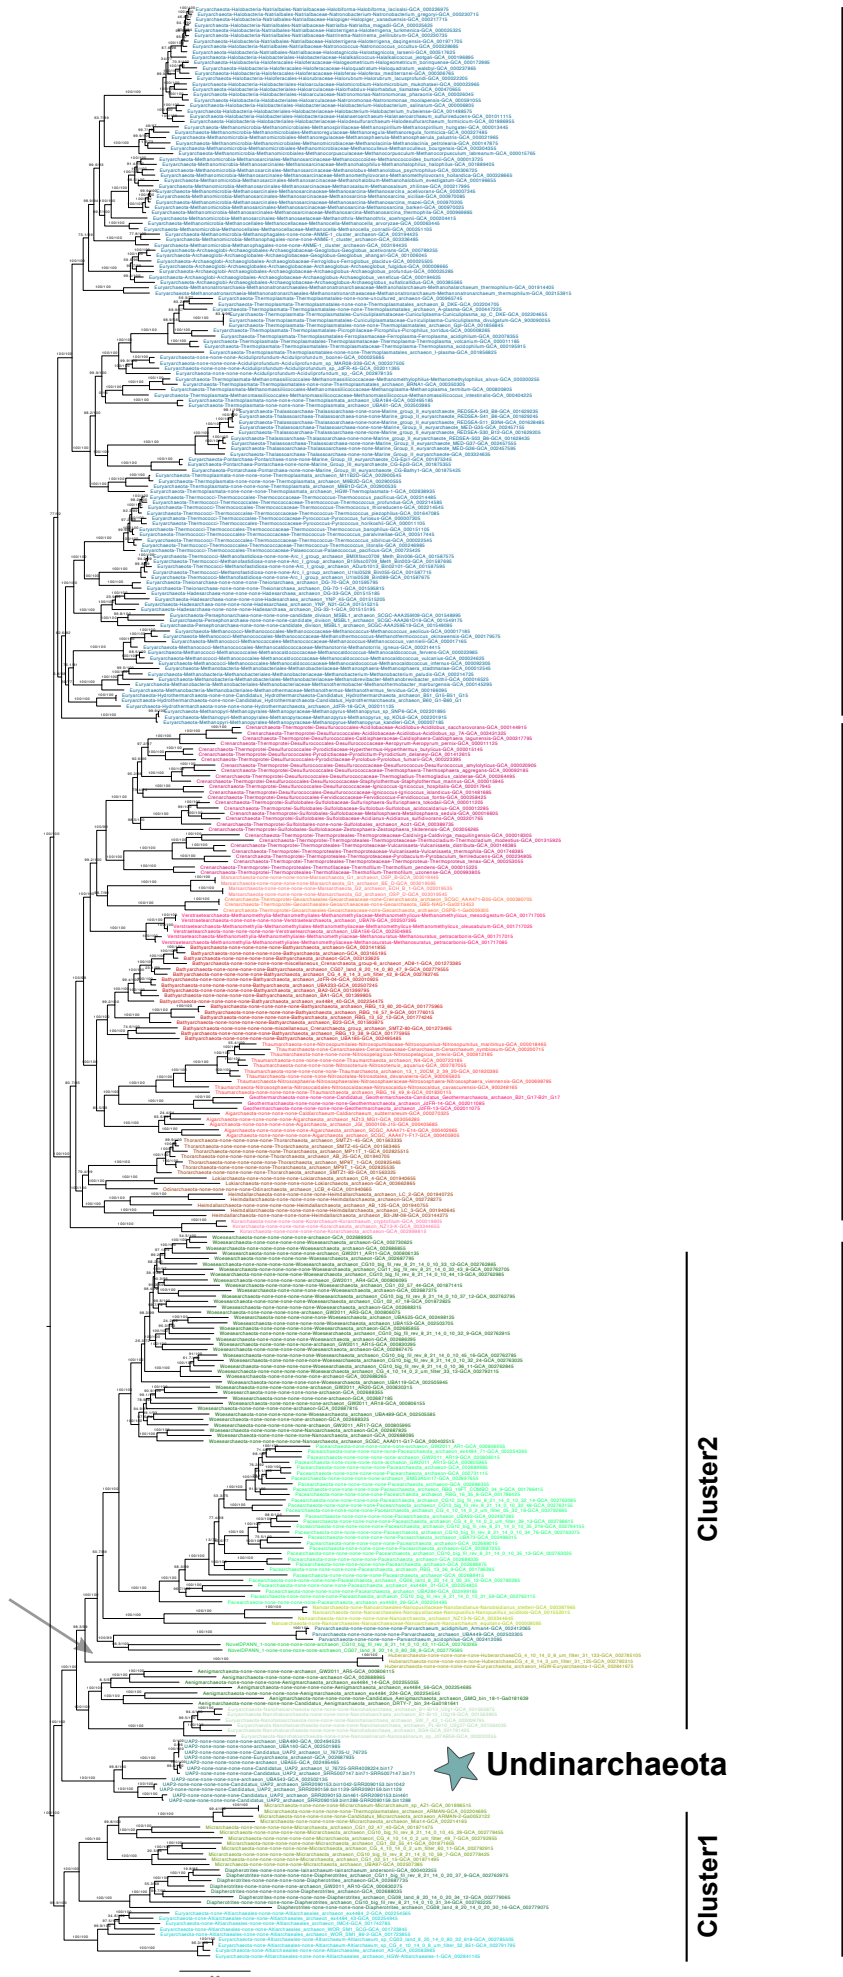

Euryarchaeota

TACK + Asgard

DPANN

Cluster2

Cluster1

★ Undinarchaeota

**Supplementary Figure 18 | Phylogenetic placement of Undinarchaeota based on an alignment generated with the 50% top ranked proteins (n=56) and the 364 species set.** 40% of fast-evolving sites were removed from the alignment with SlowFaster (alignment length = 7,651 aa). A ML phylogenetic tree was inferred with the LG+C60+F+R model with an ultrafast bootstrap approximation (left) and SH-like approximate likelihood tests (right), each run with 1000 replicates. The tree was artificially rooted with the DPANN archaea and the grey arrow shows the root position inferred with minimal ancestor deviation rooting (Tria et al., 2017). Scale bar: Average number of substitutions per site. Tree statistics for tree number 11 can be found in Supplementary Data 6.

364 species  
 50% top ranked proteins (n=56)  
 removal of heterogeneous sites  
 Pruner, 10% site removal  
 11,565 amino acids  
 Iqtree, LG+C60+F+R

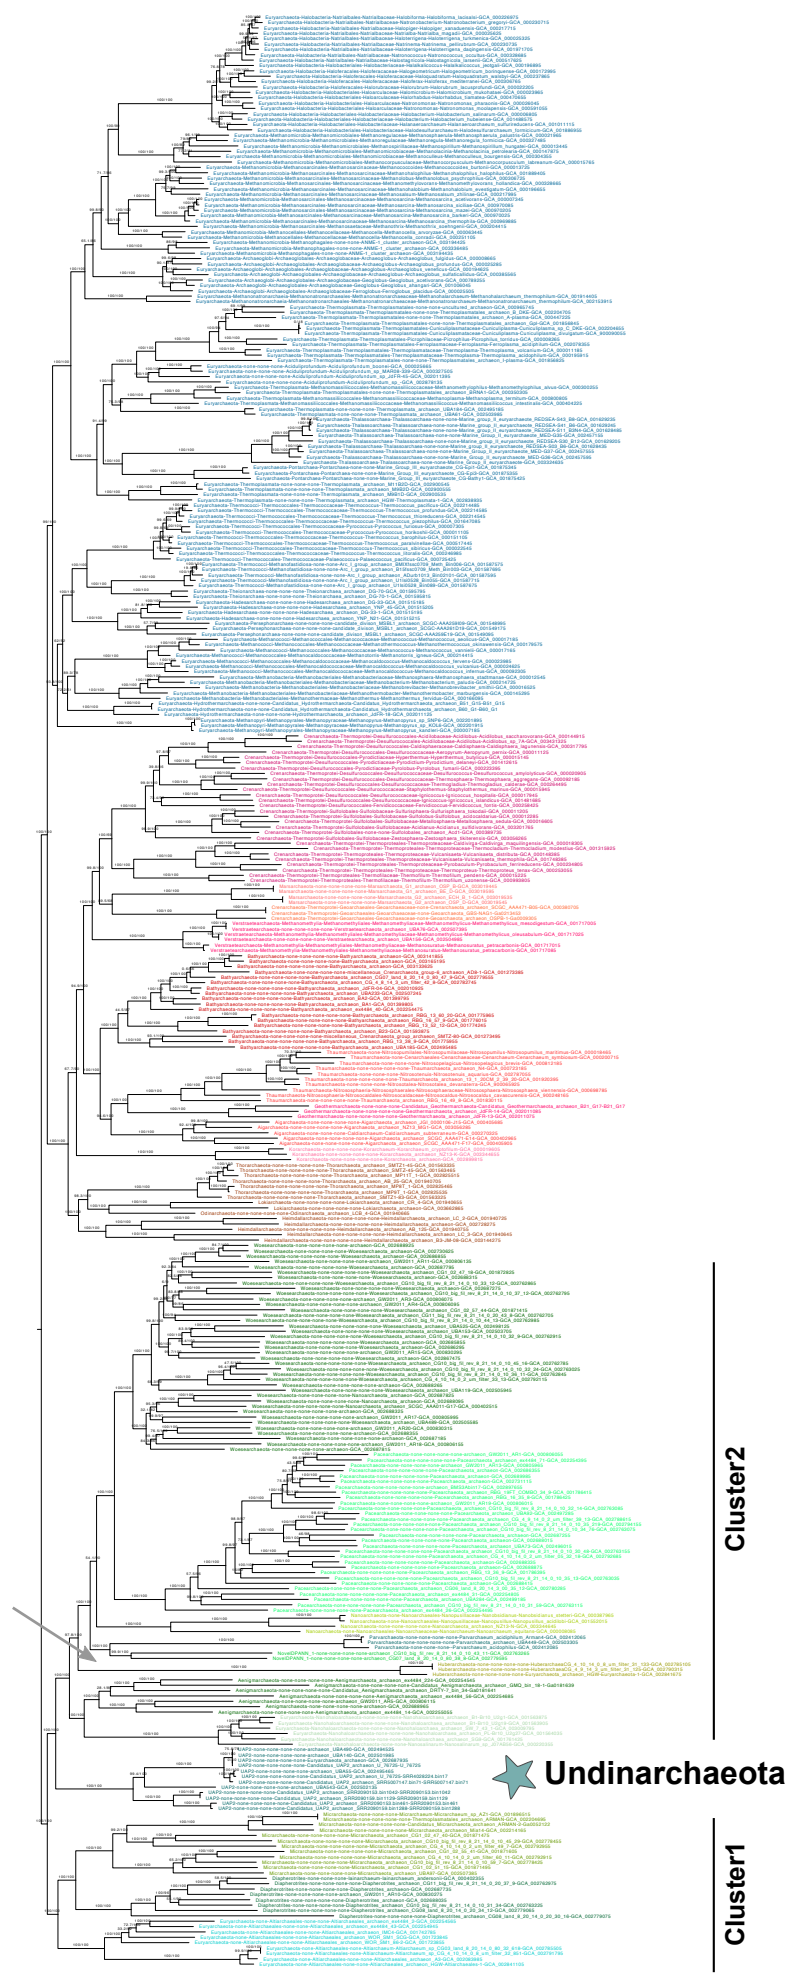

Euryarchaeota

TACK + Asgard

Cluster2

DPANN

Cluster1

★ Undinarchaeota

**Supplementary Figure 19 | Phylogenetic placement of Undinarchaeota based on an alignment generated with the 50% top ranked proteins (n=56) and the 364 species set.** 10% of heterogeneous sites were removed from the alignment using the chi2 test (alignment length = 11,565 aa). A ML phylogenetic tree was inferred with the LG+C60+F+R model with an ultrafast bootstrap approximation (left) and SH-like approximate likelihood tests (right), each run with 1000 replicates. The tree was artificially rooted with the DPANN archaea and the grey arrow shows the root position inferred with minimal ancestor deviation rooting (Tria et al., 2017). Scale bar: Average number of substitutions per site. Tree statistics for tree number 12 can be found in Supplementary Data 6.

364 species  
 50% top ranked proteins (n=56)  
 removal of heterogeneous sites  
 Pruner, 20% site removal  
 10,280 amino acid  
 Iqtree, LG+C60+F+R

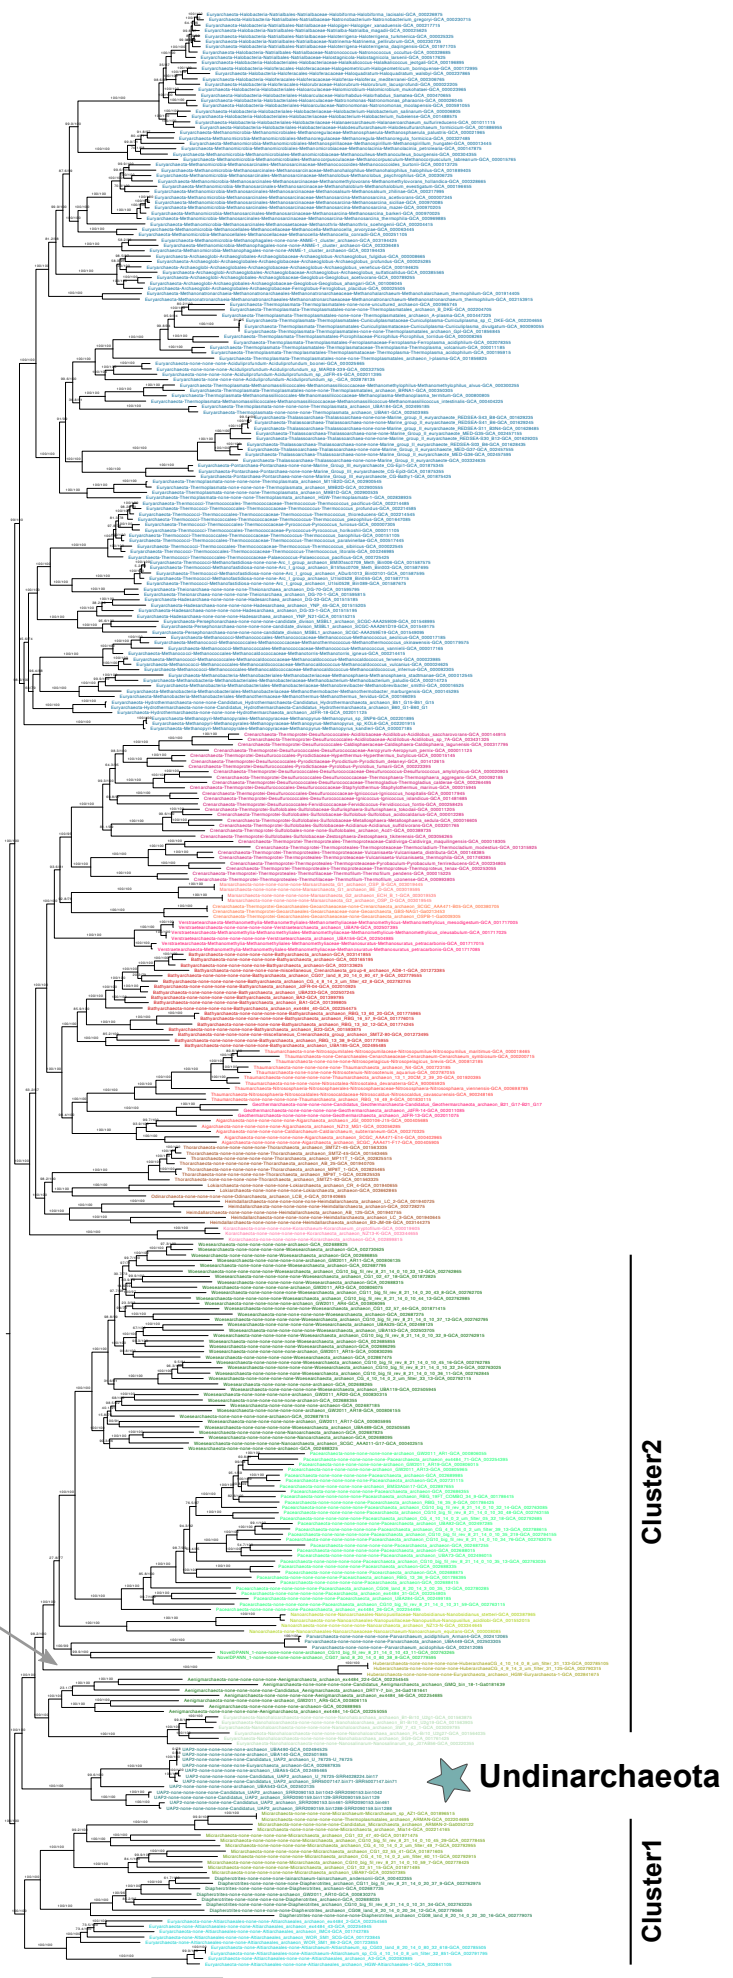

Euryarchaeota

TACK + Asgard

Cluster2

DPANN

★ Undinarchaeota

Cluster1

**Supplementary Figure 20 | Phylogenetic placement of Undinarchaeota based on an alignment generated with the 50% top ranked proteins (n=56) and the 364 species set.** 20% of heterogeneous sites were removed from the alignment using the chi2 test (alignment length = 10,280 aa). A ML phylogenetic tree was inferred with the LG+C60+F+R model with an ultrafast bootstrap approximation (left) and SH-like approximate likelihood tests (right), each run with 1000 replicates. The tree was artificially rooted with the DPANN archaea and the grey arrow shows the root position inferred with minimal ancestor deviation rooting (Tria et al., 2017). Scale bar: Average number of substitutions per site. Tree statistics for tree number 13 can be found in Supplementary Data 6.



364 species  
 50% top ranked proteins (n=56)  
 removal of heterogeneous sites  
 Pruner, 20% site removal  
 10,280 amino acids  
 Iqtree, NONREV+R10

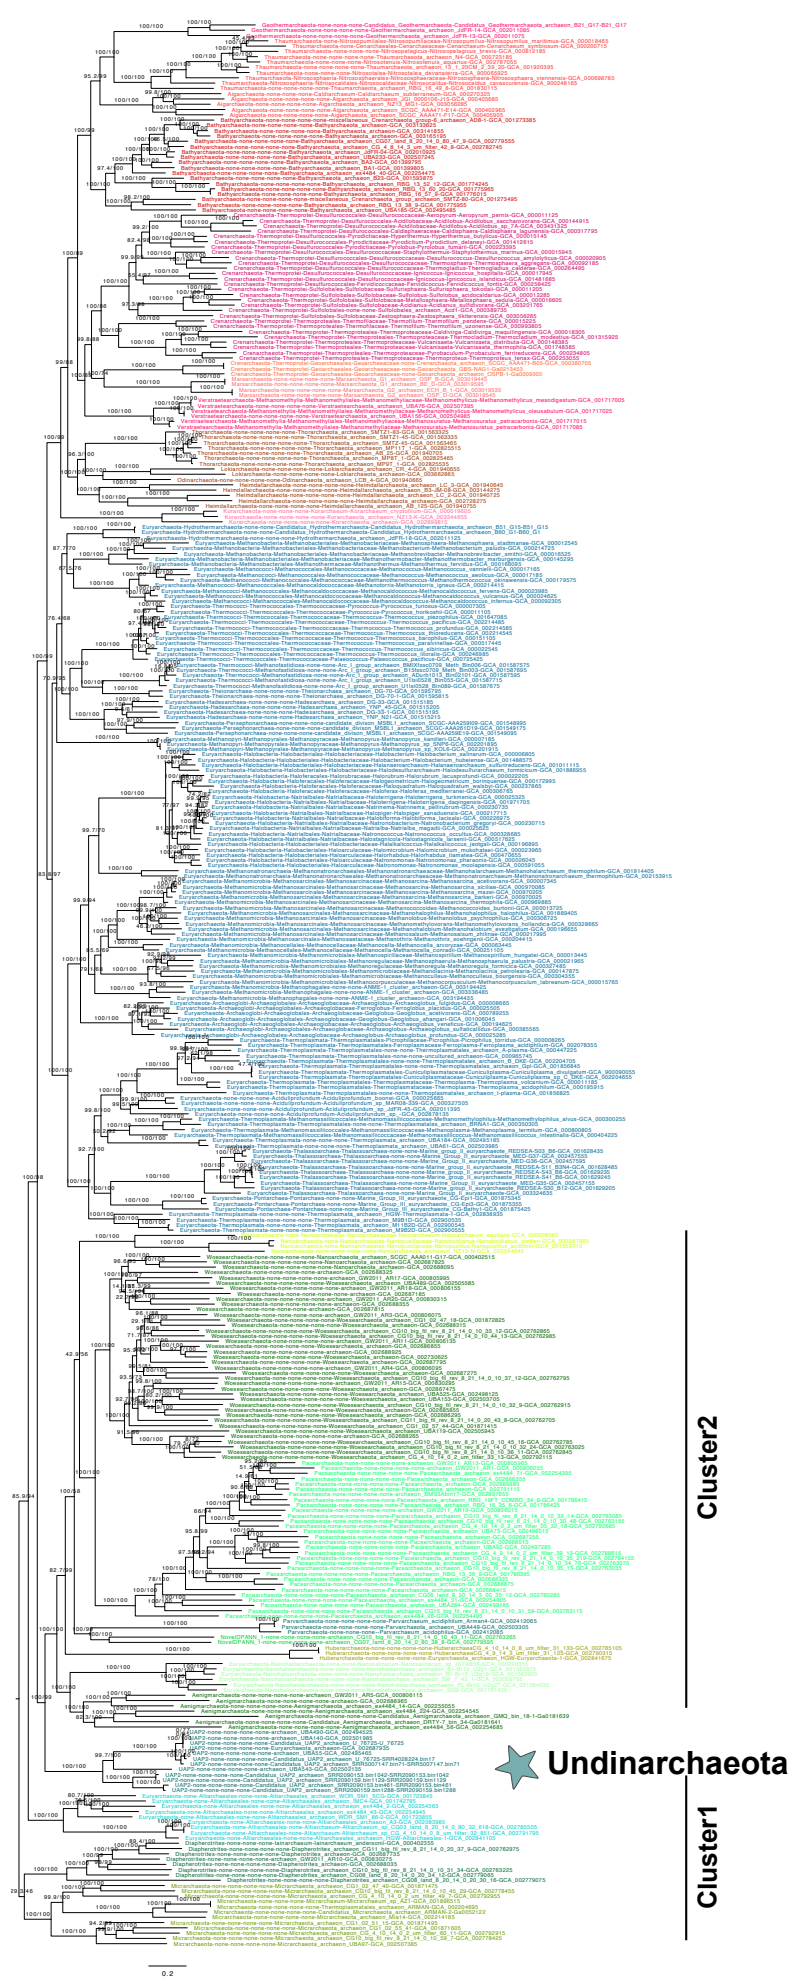

TACK+A

Euryarchaeota

Cluster2

DPANN

Cluster1

★ Undinarchaeota

**Supplementary Figure 21 | Phylogenetic placement of Undinarchaeota based on an alignment generated with the 50% top ranked proteins (n=56) and the 364 species set.** 20% of heterogeneous sites were removed from the alignment with the chi2 test (alignment length = 10,280 aa). An ML phylogenetic tree was inferred with a non-reversible model (NONREV+R10) with an ultrafast bootstrap approximation (left) and SH-like approximate likelihood tests (right), each run with 1000 replicates. The root was inferred with the non-reversible model in iqtree. Scale bar: Average number of substitutions per site. Tree statistics for tree number 14 can be found in Supplementary Data 6.

364 species  
 50% top ranked proteins (n=56)  
 removal of heterogeneous sites  
 Pruner, 30% site removal  
 8,995 amino acids  
 Iqtree, LG+C60+F+R

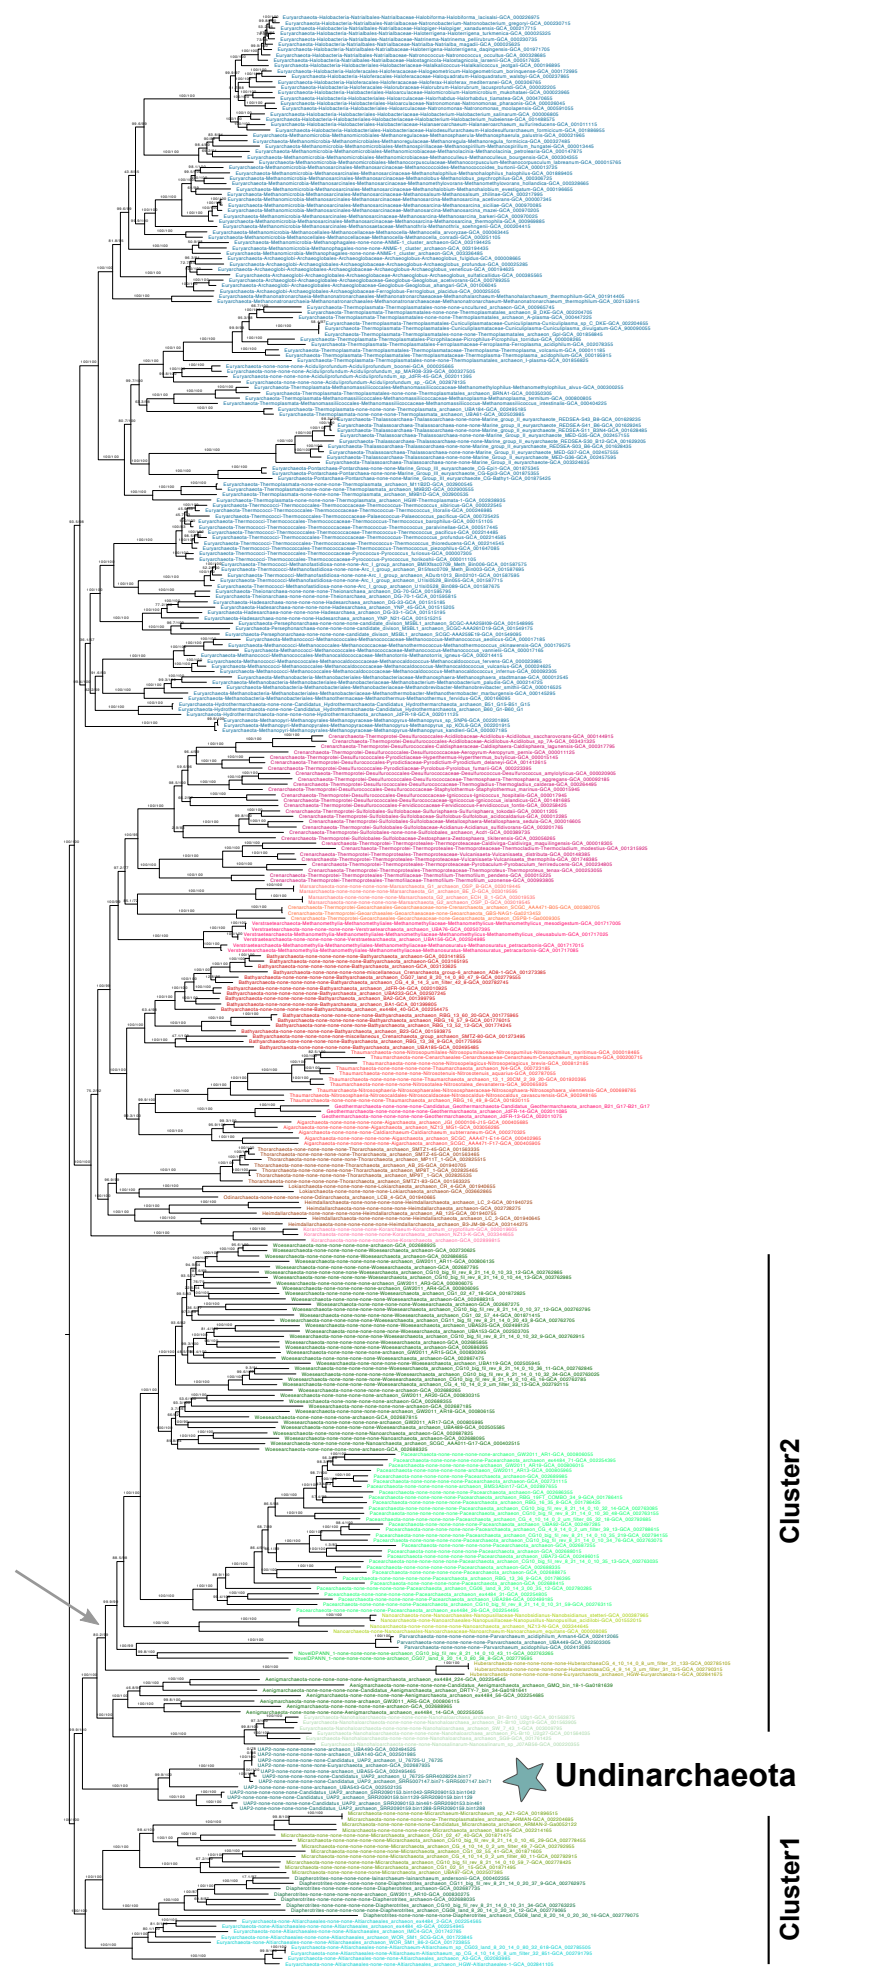

Euryarchaeota

TACK + Asgard

Cluster2

DPANN

★ Undinarchaeota

Cluster1

**Supplementary Figure 22 | Phylogenetic placement of Undinarchaeota based on an alignment generated with the 50% top ranked proteins (n=56) and the 364 species set.** 30% of heterogeneous sites were removed from the alignment using the chi2 test (alignment length = 8,995 aa). A ML phylogenetic tree was inferred with the LG+C60+F+R model with an ultrafast bootstrap approximation (left) and SH-like approximate likelihood tests (right), each run with 1000 replicates. The tree was artificially rooted with the DPANN archaea and the grey arrow shows the root inferred with minimal ancestor deviation rooting (Tria et al., 2017). Scale bar: Average number of substitutions per site. Tree statistics for tree number 15 can be found in Supplementary Data 6.

364 species  
 50% top ranked proteins (n=56)  
 removal of heterogeneous sites  
 Pruner, 40% site removal  
 7,710 amino acids  
 Iqtree, LG+C60+F+R

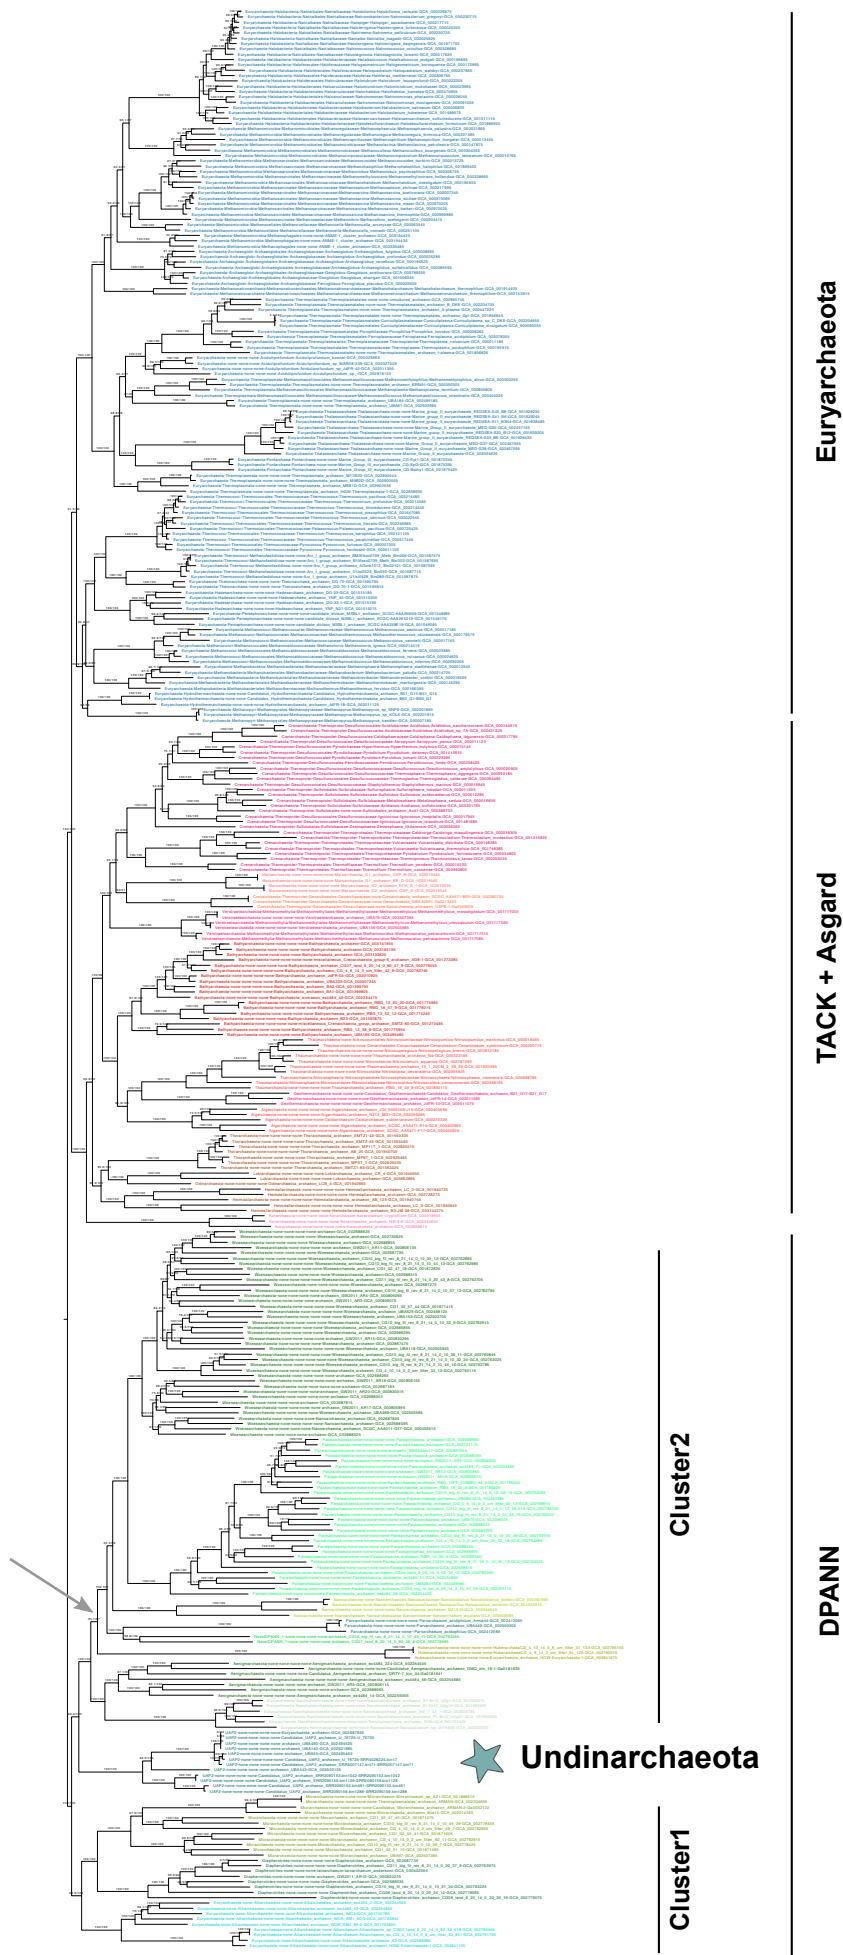

**Supplementary Figure 23 | Phylogenetic placement of Undinarchaeota based on an alignment generated with the 50% top ranked proteins (n=56) and the 364 species set.** 40% of heterogeneous sites were removed from the alignment using the chi2 test (alignment length = 7,710 aa). A ML phylogenetic tree was inferred with the LG+C60+F+R model with an ultrafast bootstrap approximation (left) and SH-like approximate likelihood tests (right), each run with 1000 replicates. The tree was artificially rooted with the DPANN archaea and the grey arrow shows the root position inferred with minimal ancestor deviation rooting (Tria et al., 2017). Scale bar: Average number of substitutions per site. Tree statistics for tree number 16 can be found in Supplementary Data 6.

364 species  
 50% top ranked proteins (n=56)  
 removal of heterogeneous sites  
 Pruner, 40% site removal  
 7,710 amino acids  
 Iqtree, NONREV+R10

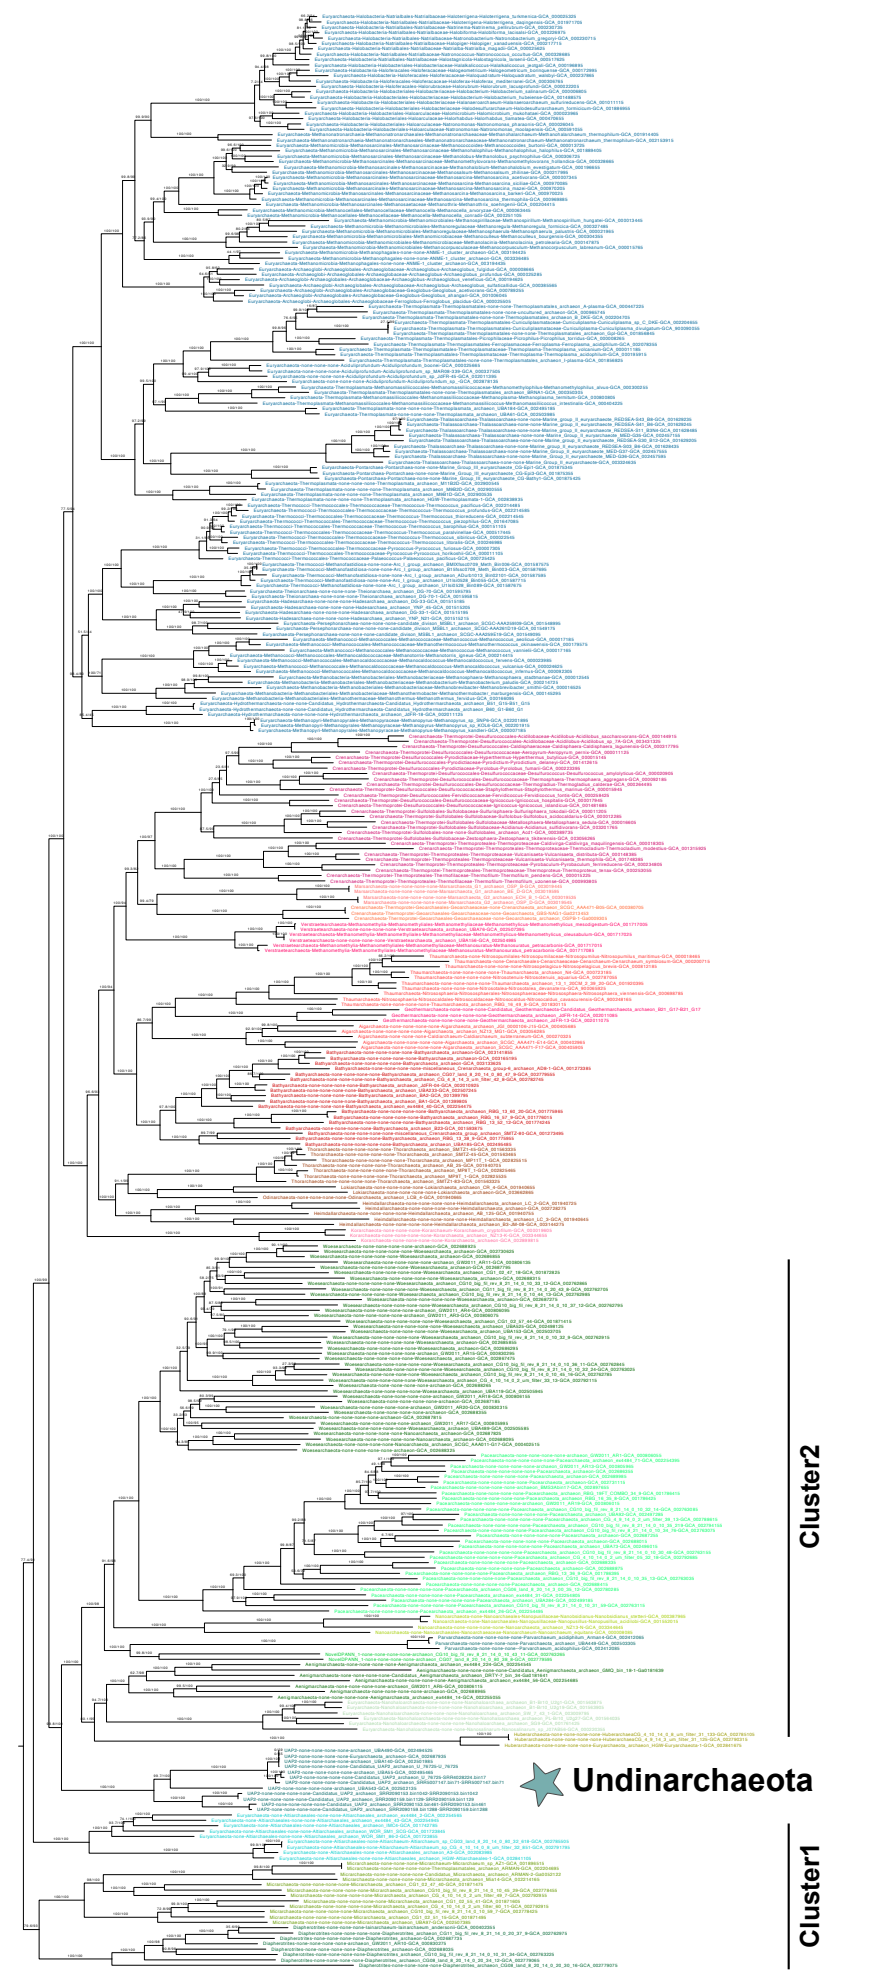

Euryarchaeota

TACK + Asgard

DPANN

Cluster2

Cluster1

★ Undinarchaeota

**Supplementary Figure 24 | Phylogenetic placement Undinarchaeota based on an alignment generated with the 50% top ranked proteins (n=56) and the 364 species set.** 40% of heterogeneous sites were removed from the alignment using the chi2 test (alignment length = 7,710 aa). A ML phylogenetic tree was inferred with a non-reversible model (NONREV+R10) with an ultrafast bootstrap approximation (left) and SH-like approximate likelihood tests (right), each run with 1000 replicates. The tree was rooted using the non-reversible model in iqtree. Scale bar: Average number of substitutions per site. Tree statistics for tree number 17 can be found in Supplementary Data 6.



127 species  
 50% top ranked proteins  
 (n=57)  
 trimmed alignment (BMGE)  
 13,496 amino acids  
 Iqtree, LG+C60+F+R

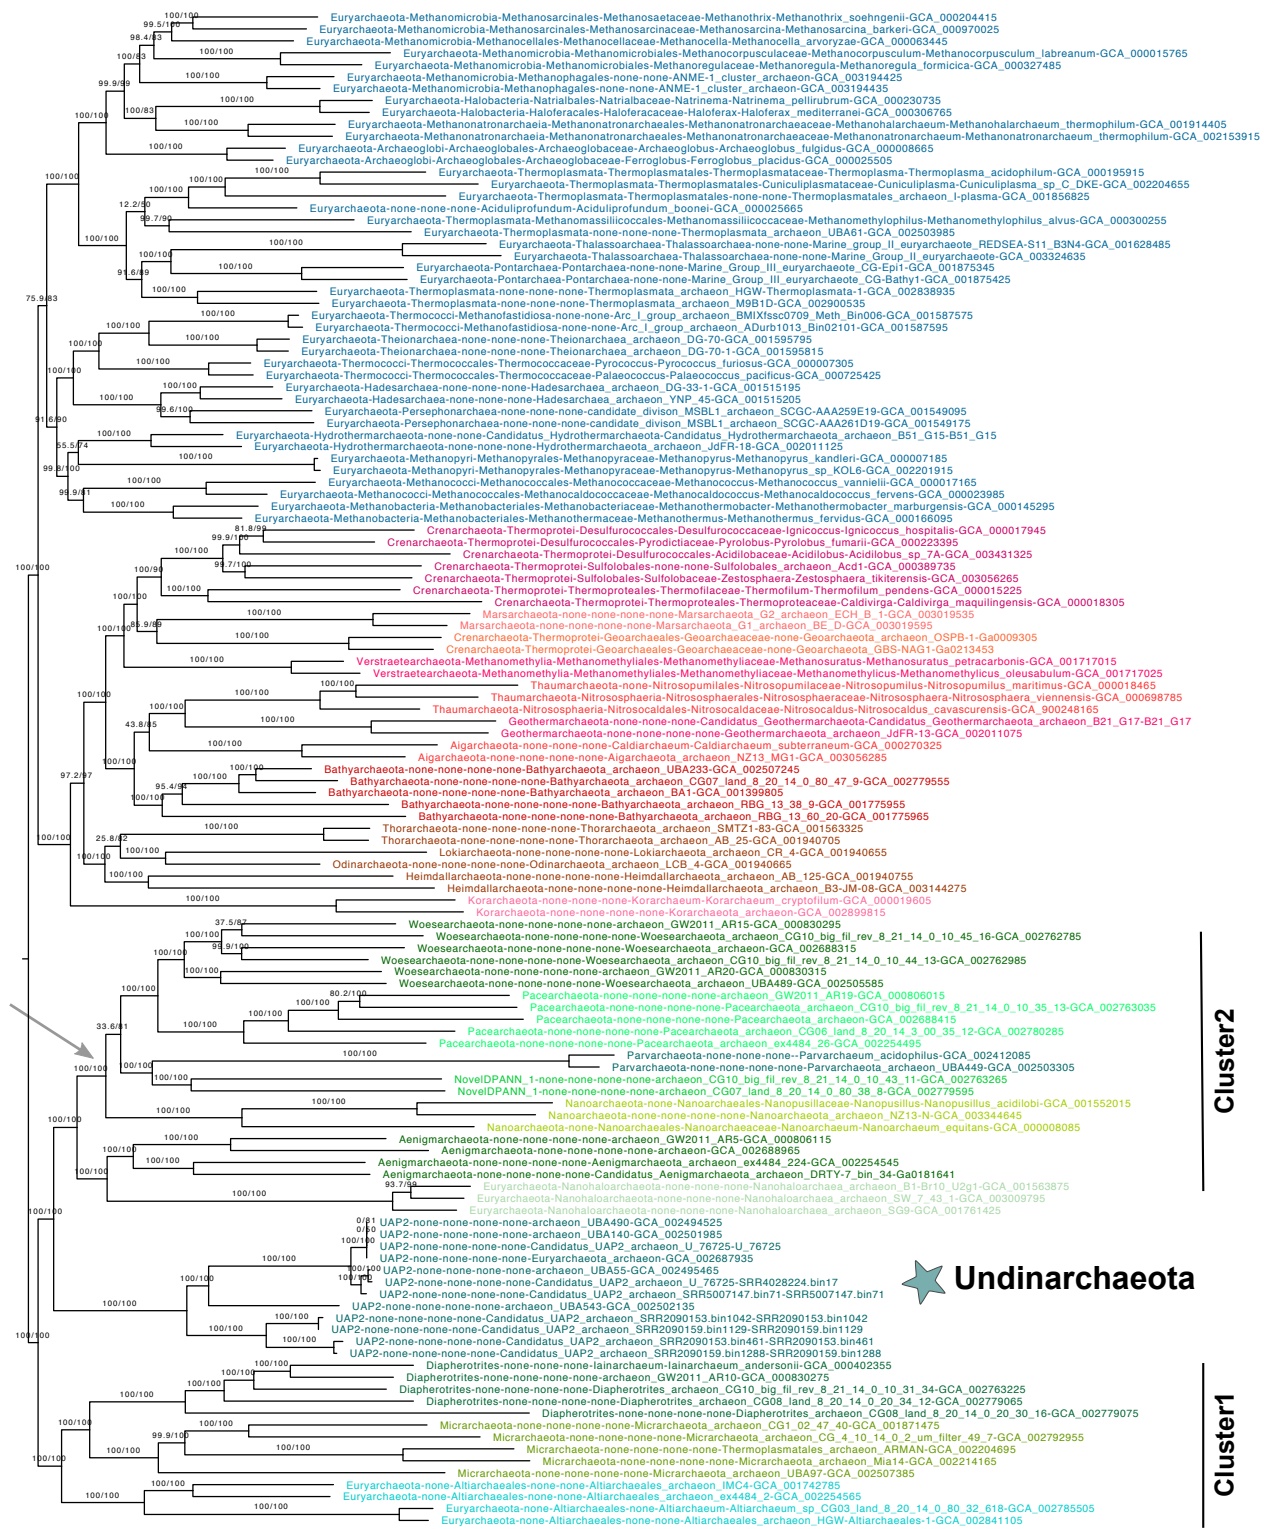

**Supplementary Figure 25 | Phylogenetic placement of Undinarchaeota based on an alignment generated with the 50% top ranked proteins (n=57) and the 127 species set.** The alignment was trimmed with BMGE (alignment length = 13,496 aa). A ML phylogenetic tree was inferred with the LG+C60+F+R model with an ultrafast bootstrap approximation (left) and SH-like approximate likelihood tests (right), each run with 1000 replicates. The tree was artificially rooted with the DPANN archaea and the grey arrow shows the root position inferred with minimal ancestor deviation rooting (Tria et al., 2017). Scale bar: Average number of substitutions per site. Tree statistics for tree number 18 can be found in Supplementary Data 6.

127 species  
 50% top ranked proteins (n=57)  
 trimmed alignment (BMGE)  
 13,496 amino acids  
 Iqtree, LG -m MFP+MERGE,  
 followed by NONREV

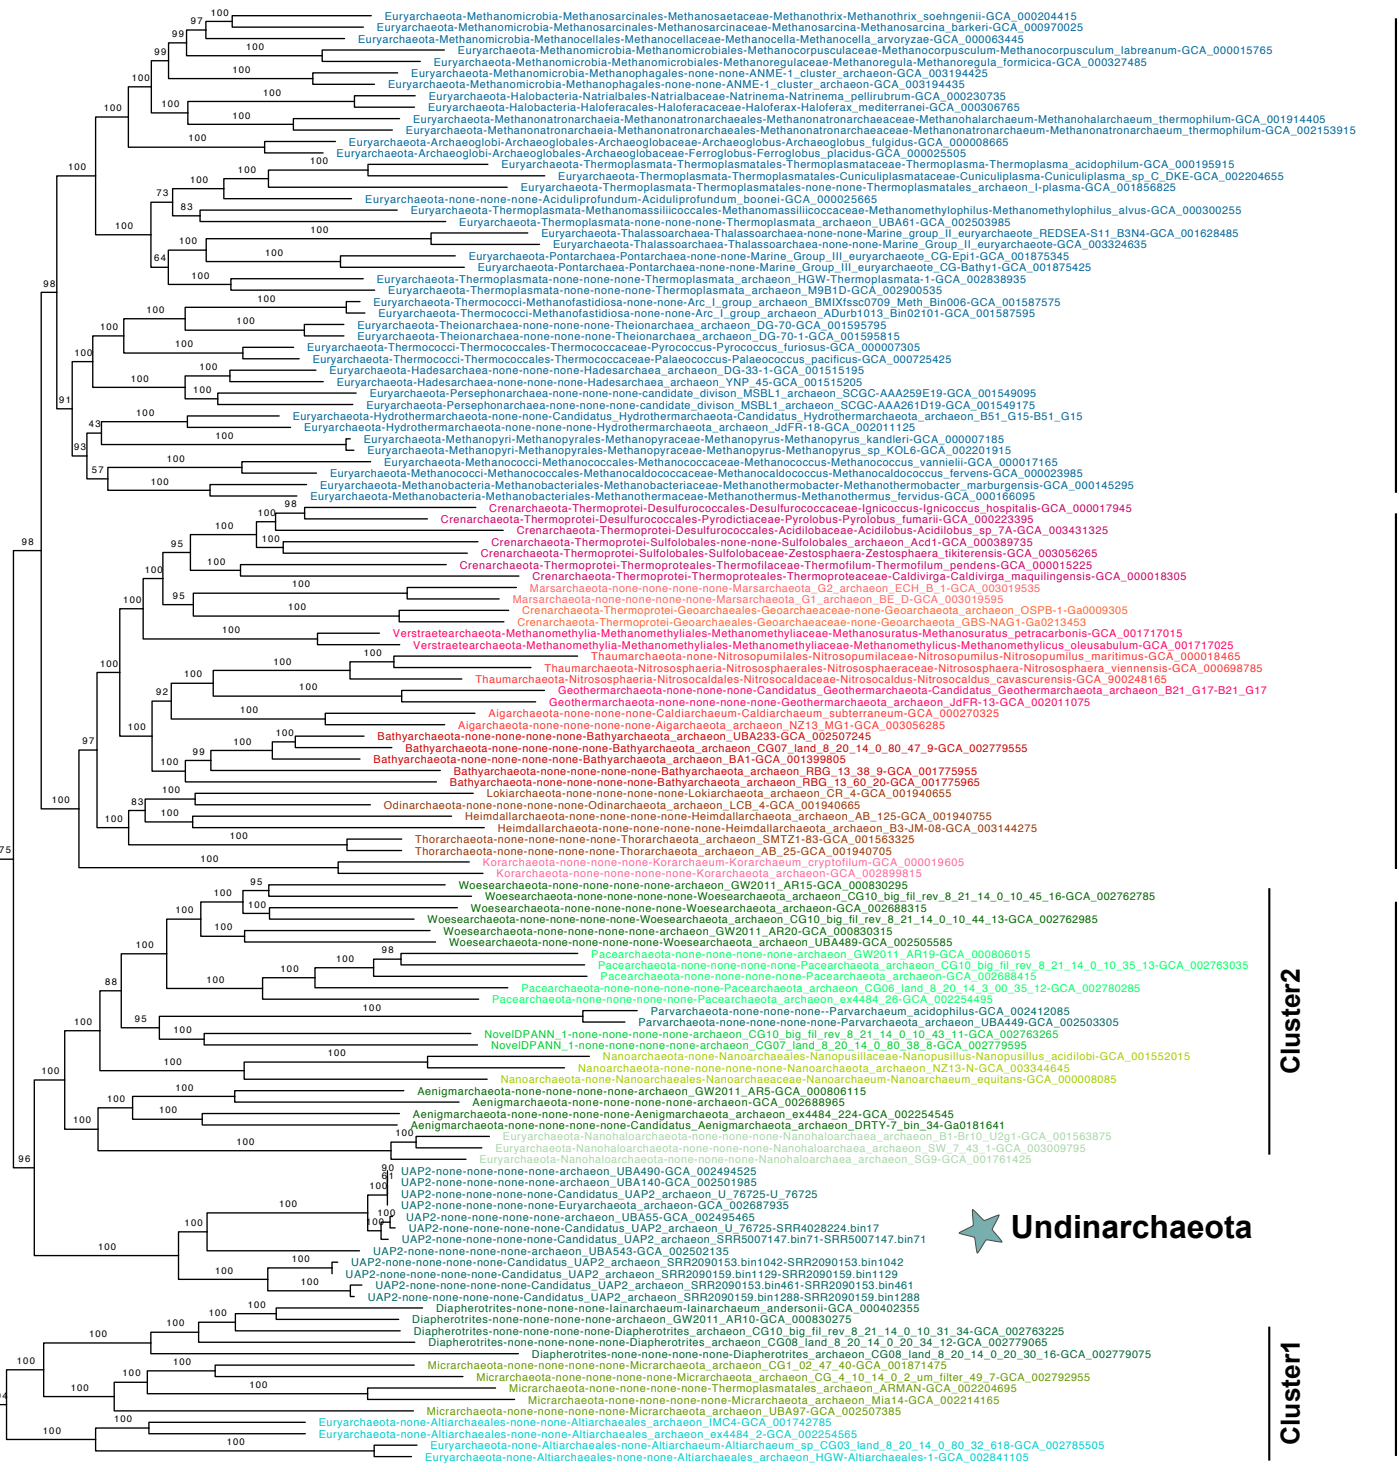

**Supplementary Figure 26 | Phylogenetic placement of Undinarchaeota based on an alignment generated with the 50% top ranked proteins (n=57) and the 127 species set.** The alignment was trimmed with BMGE (alignment length= 13,496 aa). An initial ML phylogenetic tree was inferred with the LG model (-m MFP+MERGE) followed by a tree generated with a non-reversible model with an ultrafast bootstrap approximation run with 1000 replicates. The tree was rooted with the non-reversible model in iqtree. Scale bar: Average number of substitutions per site. Tree statistics for tree number 19 can be found in Supplementary Data 6.

127 species  
 50% top ranked proteins (n=57)  
 trimmed alignment (BMGE)  
 13,496 amino acids  
 Iqtree, NONREV model

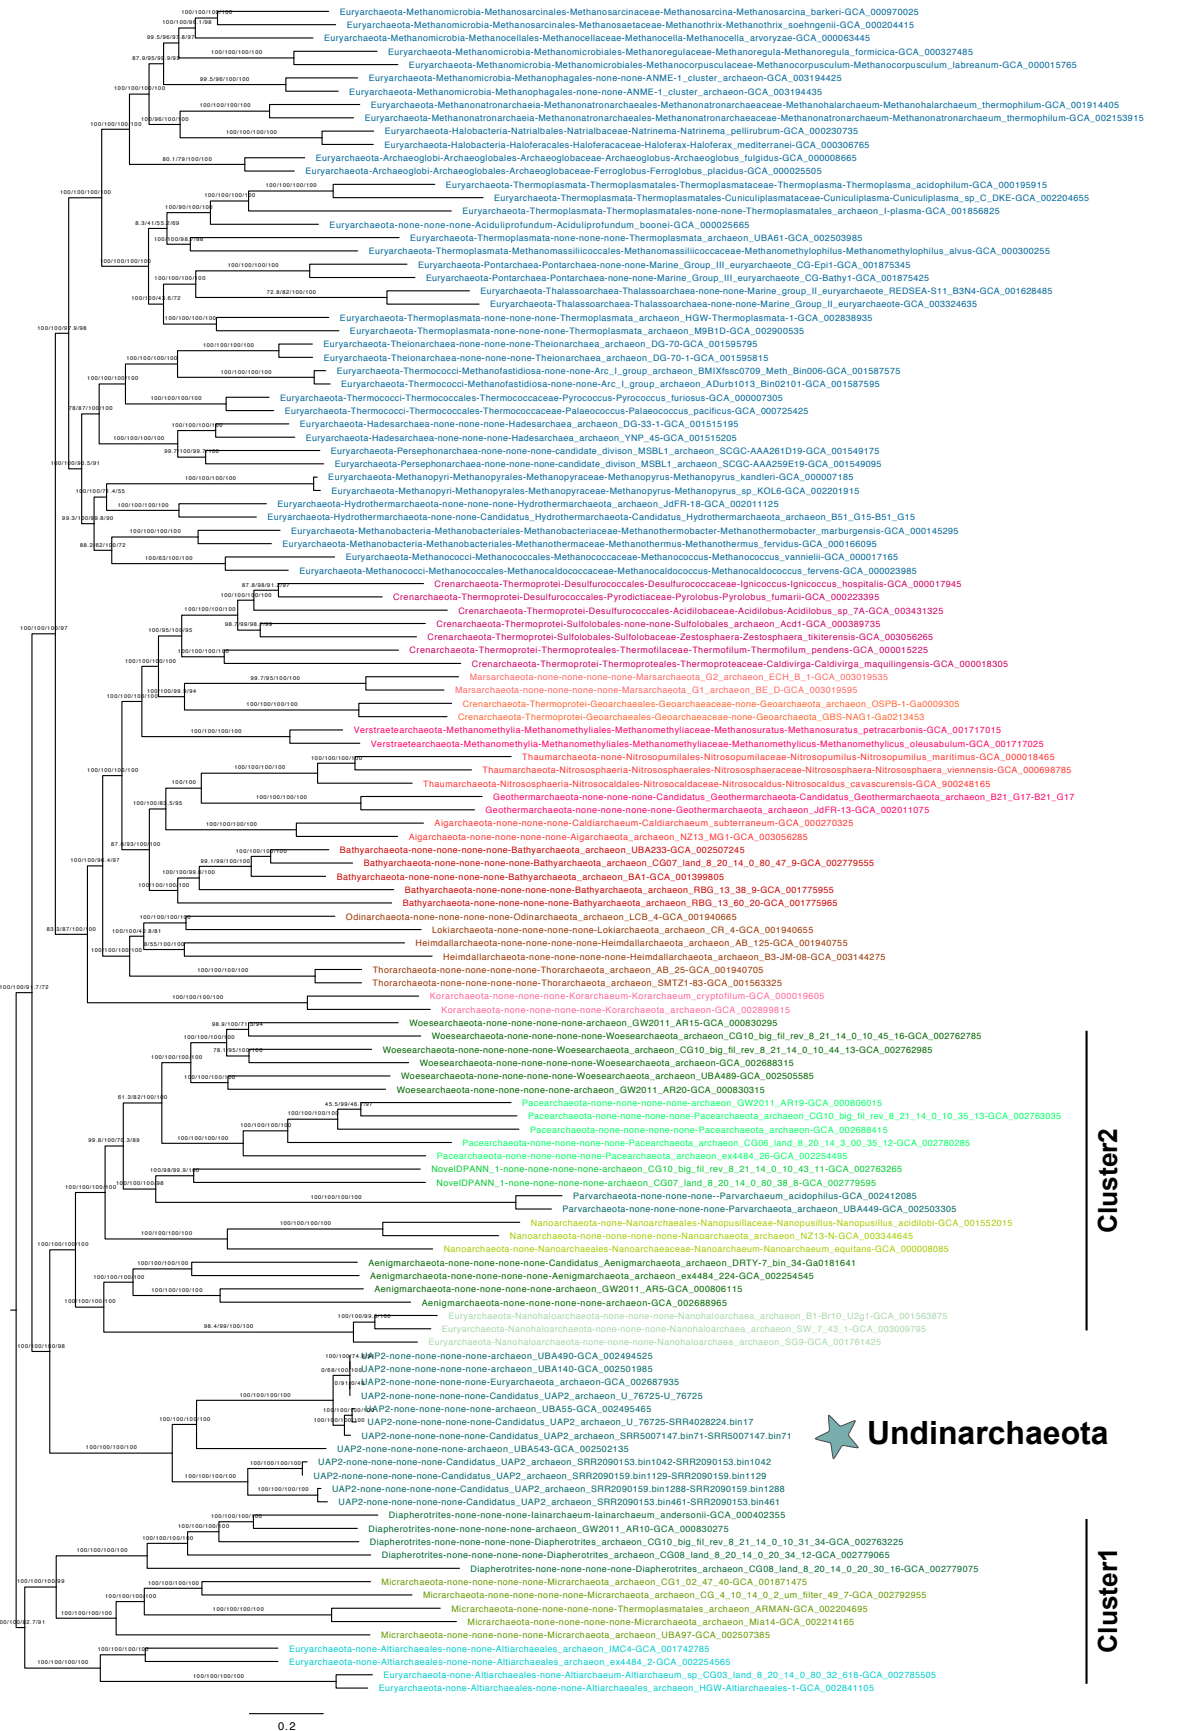

Euryarchaeota

TACK + Asgard

Cluster2

DPANN

★ Undinarchaeota

Cluster1

Supplementary Figure 27 | Phylogenetic placement of Undinarchaeota based on an alignment generated with the 50% top ranked proteins (n=57) and the 127 species set. The alignment was trimmed with BMGE (alignment length = 13,496 aa). A ML phylogenetic tree was inferred with the NONREV model. The first two values show the support for the reversible and the second two for the non-reversible mode. Values 1 and 3 were generated with an ultrafast bootstrap approximation and values 2 and 4 with the SH-like approximate likelihood tests, each run with 1000 replicates. The tree was rooted with the non-reversible model in iqtree. Scale bar: Average number of substitutions per site. Tree statistics for tree number 20 can be found in Supplementary Data 6.

127 species  
 50% top ranked proteins (n=57)  
 trimmed alignment (BMGE)  
 13,496 amino acids  
 Phylobayes, CAT+GTR

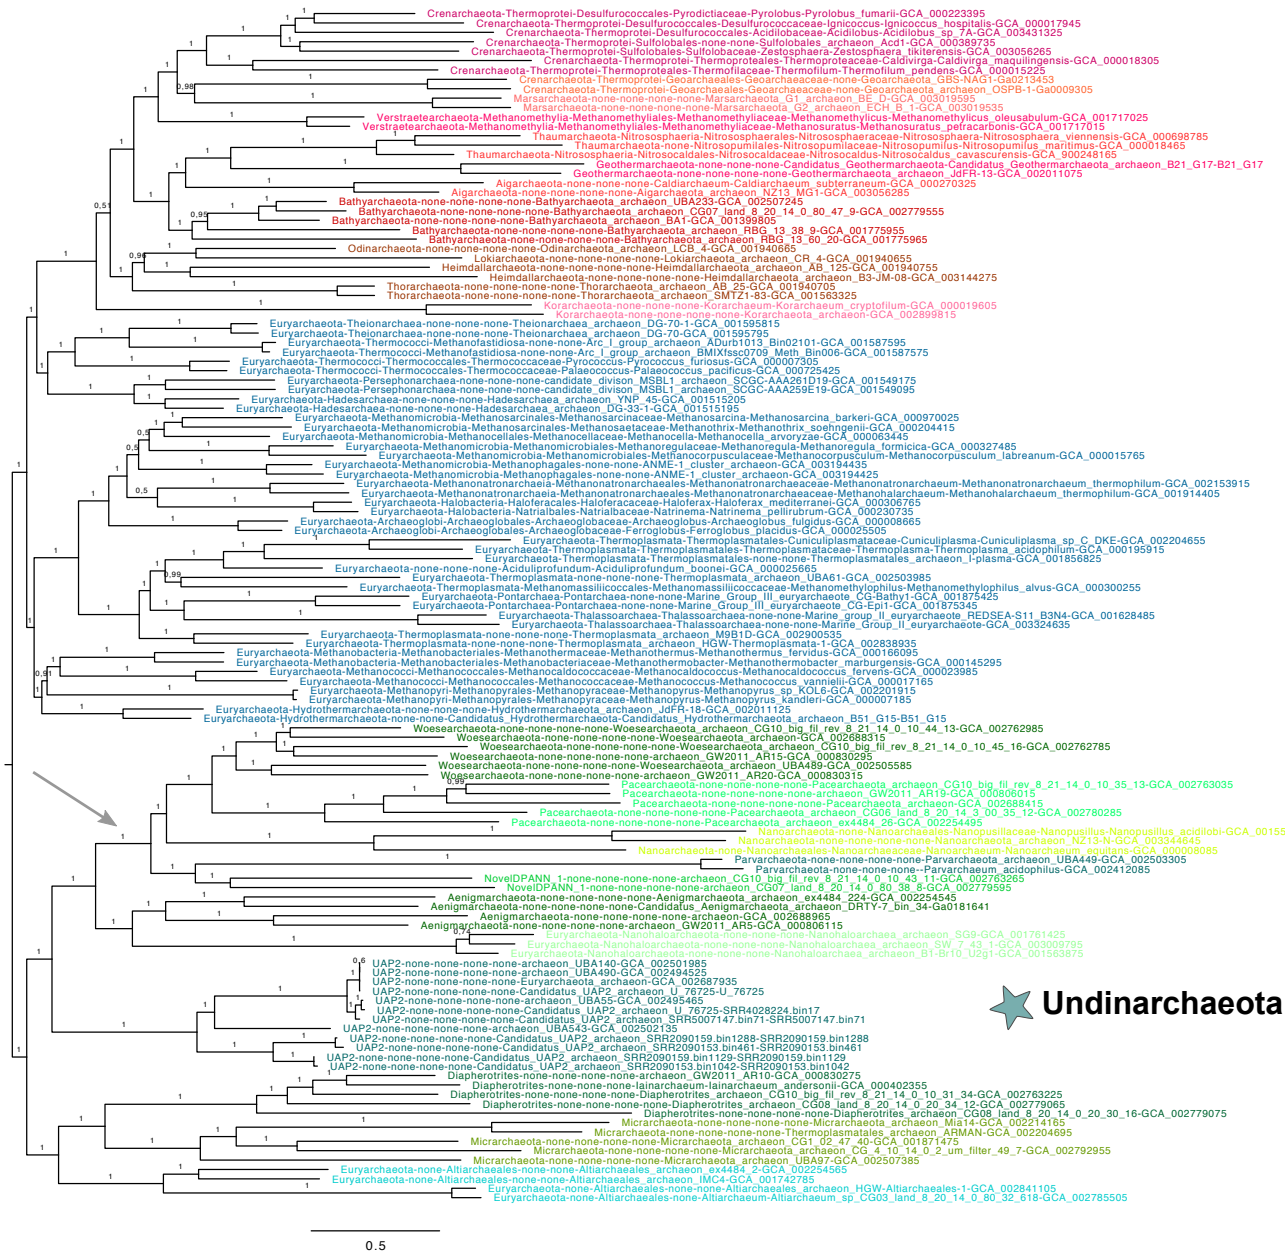

TACK + Asgard

Euryarchaeota

Cluster2

DPANN

Cluster1

★ Undinararchaeota

Supplementary Figure 28 | Phylogenetic placement of Undinararchaeota based on an alignment generated with the 50% top ranked proteins (n=57) and the 127 species set. The alignment was trimmed with BMGE (alignment length = 13,496 aa). A Bayesian phylogenetic tree was inferred with the CAT+GTR model with 14,107 cycles (25% burn-in). The tree was artificially rooted with the DPANN archaea and the grey arrow shows the root position as inferred with minimal ancestor deviation rooting (Tria et al., 2017). Scale bar: Average number of substitutions per site. Tree statistics for tree number 21 can be found in Supplementary Data 6.



127 species  
 50% top ranked proteins (n=57)  
 trimmed alignment (BMGE-FAST)  
 29,778 amino acids  
 Iqtree, LG+C60+F+R

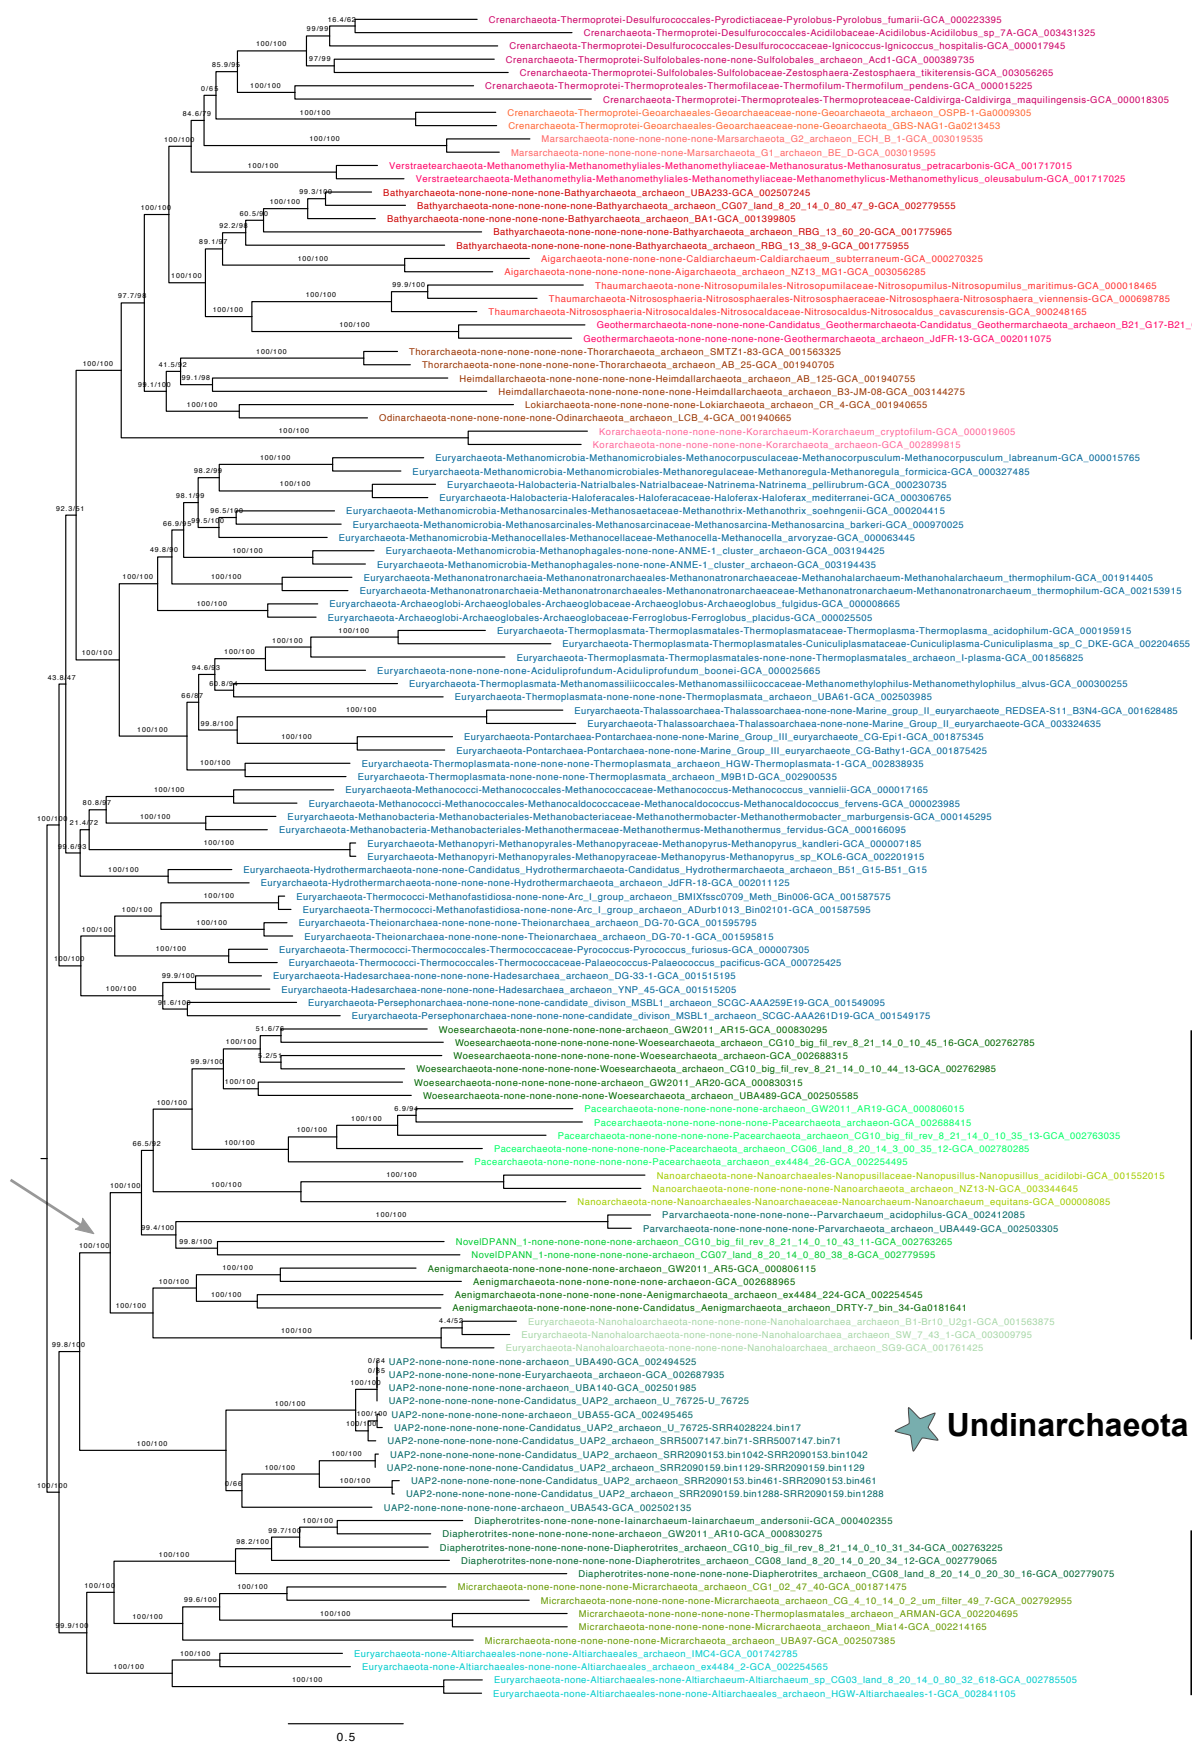

TACK + Asgard

Euryarchaeota

Cluster2

DPANN

Cluster1

Undinarchaeota

Supplementary Figure 29 | Phylogenetic placement of Undinarchaeota based on an alignment generated with the 50% top ranked proteins (n=57) and the 127 species set. The alignment was trimmed with BMGE-FAST (alignment length= 29,778 aa). A ML phylogenetic tree was inferred with the LG+C60+F+R model with an ultrafast bootstrap approximation (left) and SH-like approximate likelihood tests (right), each run with 1000 replicates. The tree was artificially rooted with the DPANN archaea and the grey arrow shows the root position inferred with minimal ancestor deviation rooting (Tria et al., 2017). Scale bar: Average number of substitutions per site. Tree statistics for tree number 22 can be found in Supplementary Data 6.

127 species  
 50% top ranked proteins (n=57)  
 trimmed alignment (BMGE)  
 SR4 decoded  
 13,496 characters  
 Iqtree, LC60SR4

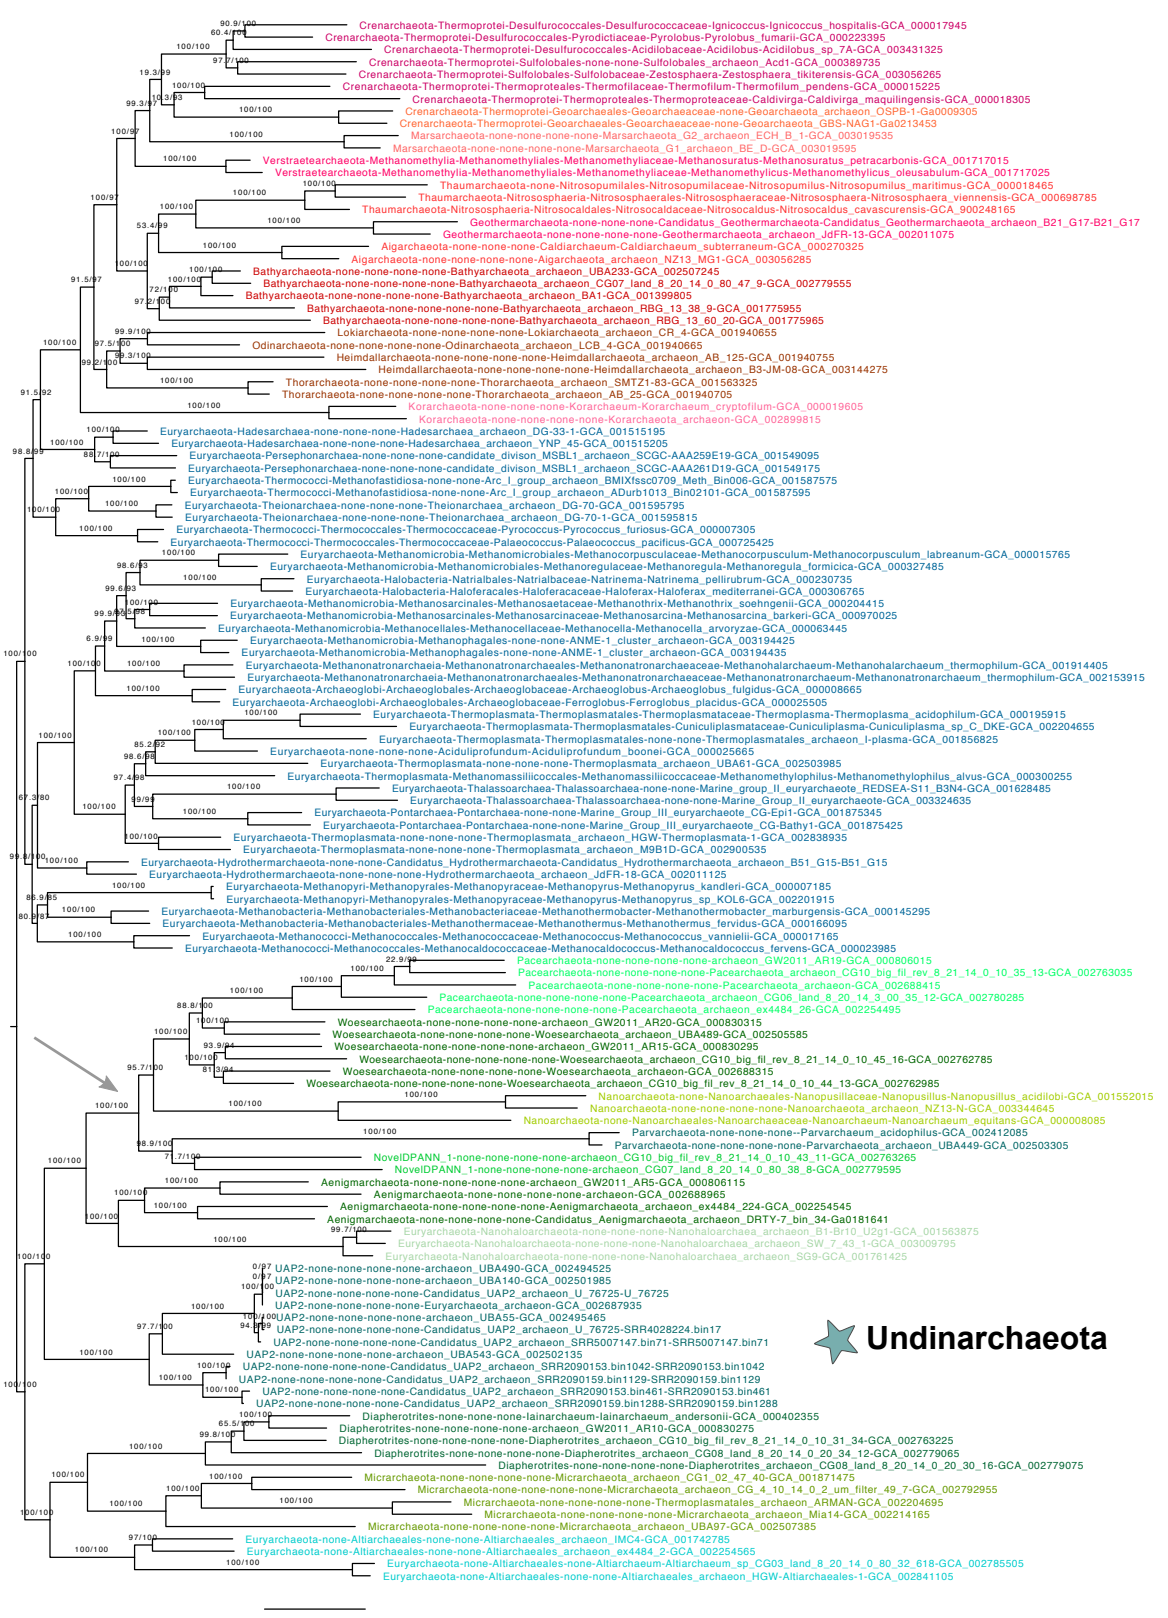

TACK + Asgard

Euryarchaeota

Cluster2

DPANN

Cluster1

★ Undinarchaeota

Supplementary Figure 30 | Phylogenetic placement of Undinarchaeota based on an alignment generated with the 50% top ranked proteins (n=57) and the 127 species set. The alignment was trimmed with BMGE and decoded into 4 character states (SR4 decoding; alignment length = 13,496 characters). A ML phylogenetic tree was inferred with the C60SR4 model with an ultrafast bootstrap approximation (left) and SH-like approximate likelihood tests (right), each run with 1000 replicates. The tree was artificially rooted with the DPANN archaea and the grey arrow shows the root position inferred with minimal ancestor deviation rooting (Tria et al., 2017). Scale bar: Average number of substitutions per site. Tree statistics for tree number 23 can be found in Supplementary Data 6.

127 species  
 50% top ranked proteins (n=57)  
 trimmed alignment (BMGE)  
 SR4 decoded  
 13,496 characters  
 Phylobayes, CAT+GTR

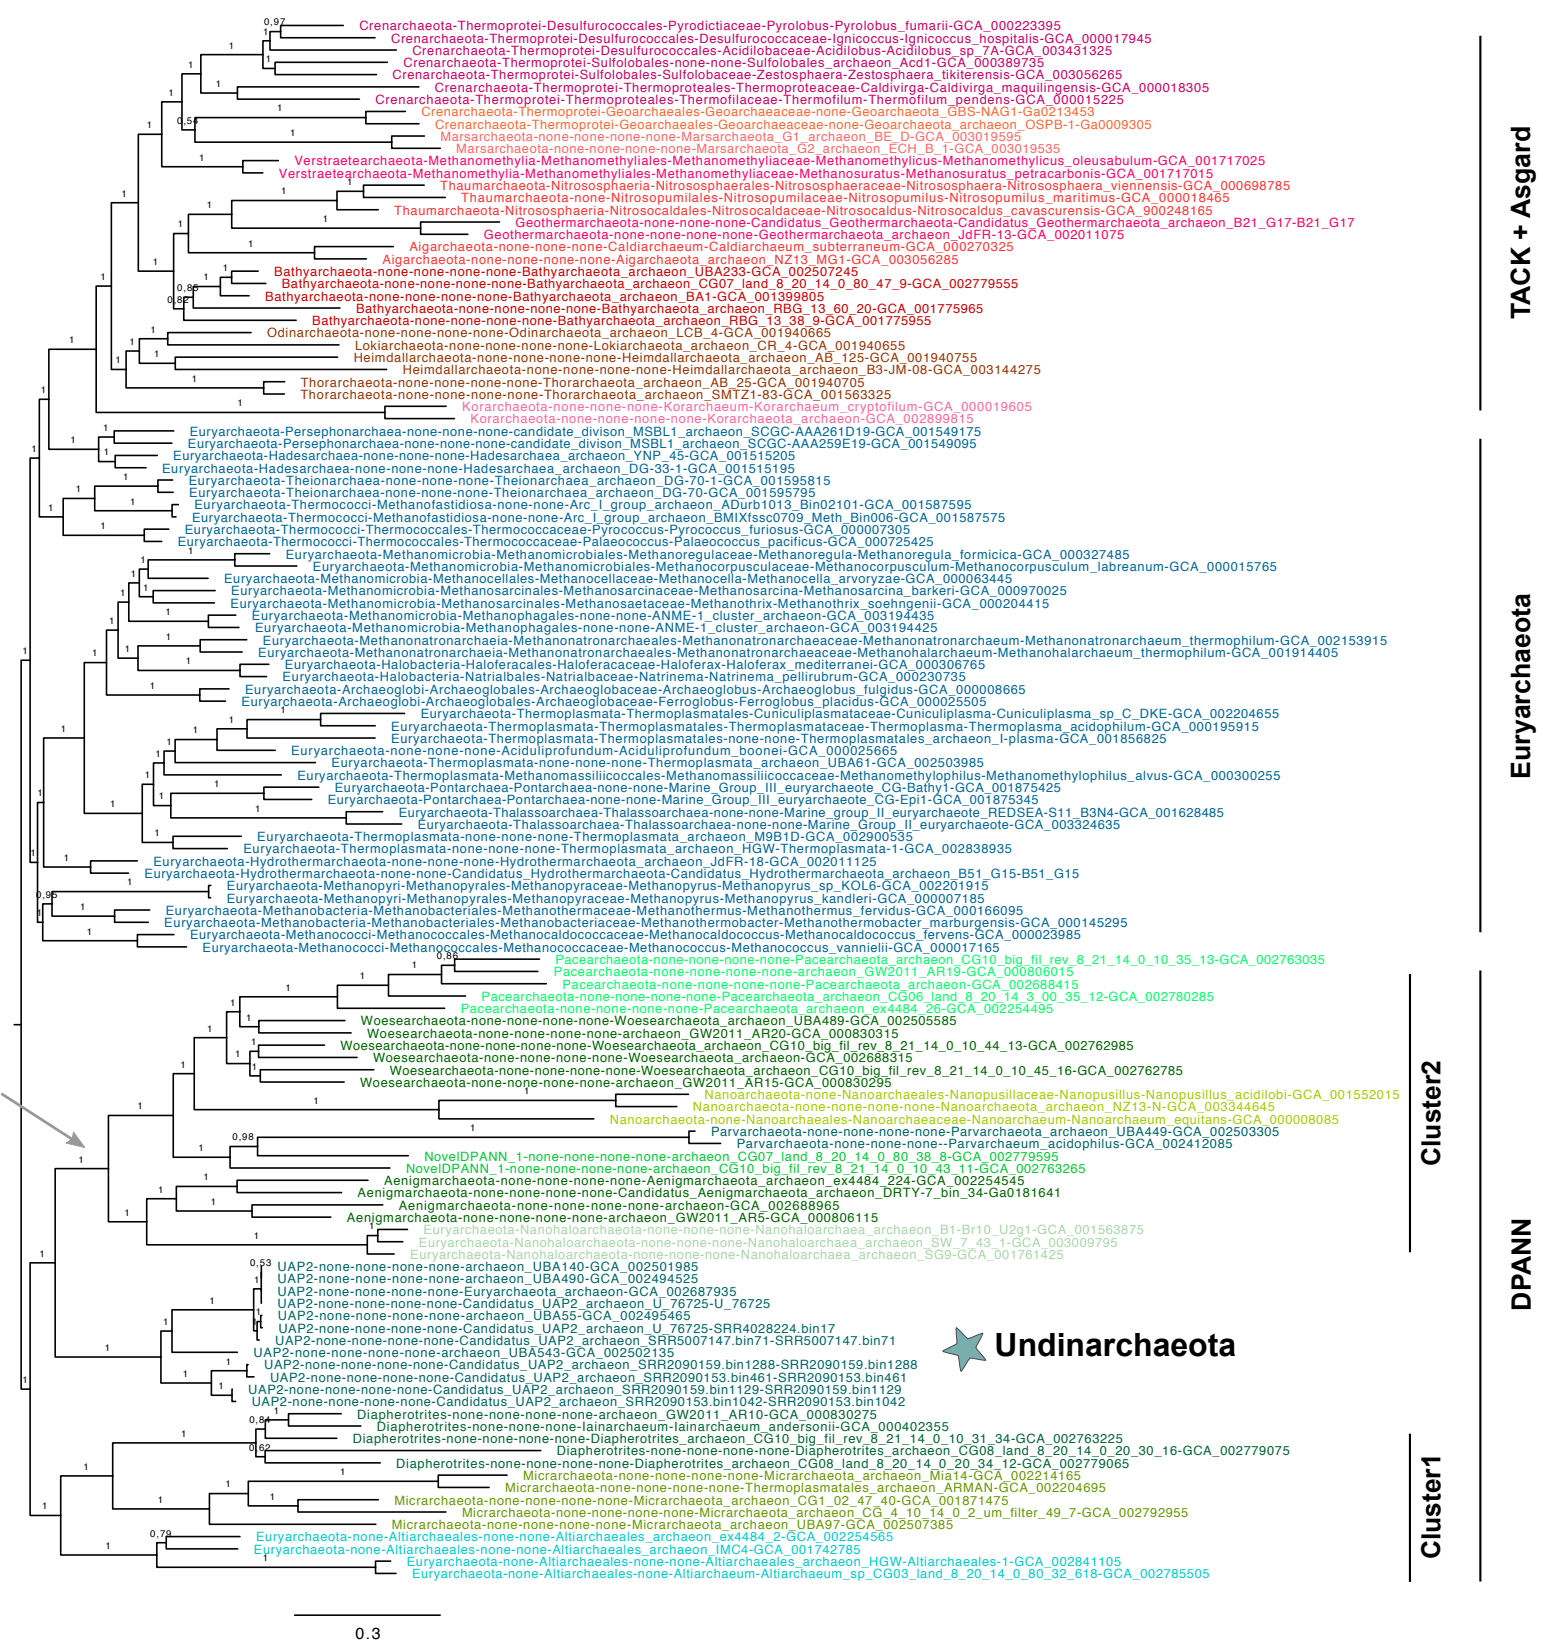

Supplementary Figure 31 | Phylogenetic placement of Undinarchaeota based on an alignment generated with the 50% top ranked proteins (n=57) and the 127 species set. The alignment was trimmed with BMGE and decoded into 4 character states (SR4 decoding; alignment length = 13,496 characters). A Bayesian phylogenetic tree was inferred with the CAT+GTR model. The tree was artificially rooted with the DPANN archaea and the grey arrow shows the root inferred with minimal ancestor deviation rooting (Tria et al., 2017). Scale bar: Average number of substitutions per site. Tree statistics for tree number 24 can be found in Supplementary Data 6.



127 species  
 50% top ranked proteins (n=57)  
 removal of fast-evolving sites  
 SlowFaster, 10% site removal  
 12,177 amino acids  
 Iqtree, LG+C60+F+R

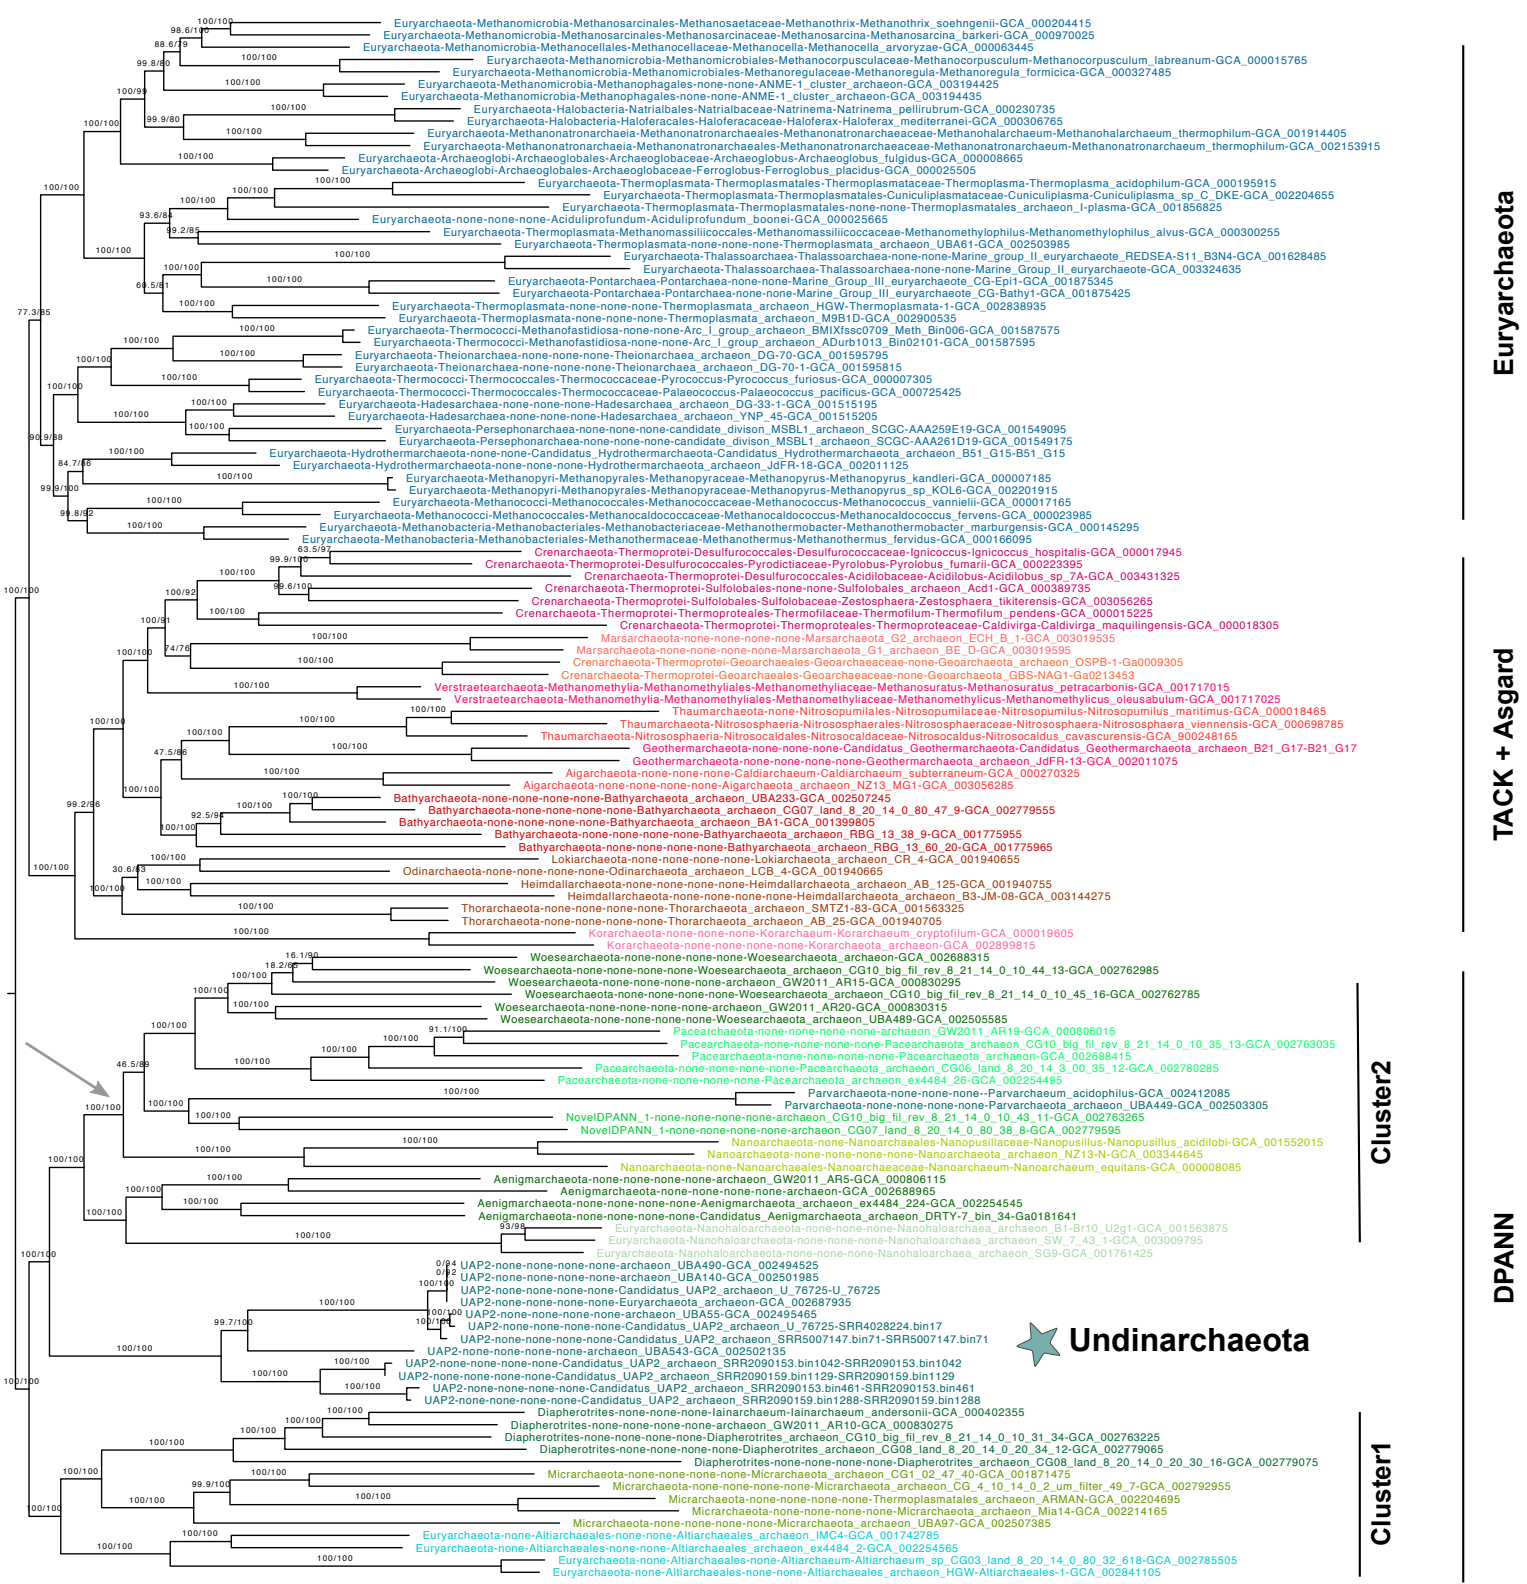

**Supplementary Figure 32 | Phylogenetic placement of Undinarchaeota based on an alignment generated with the 50% top ranked proteins (n=57) and the 127 species set.** 10% of the fast-evolving sites were removed from the alignment with SlowFaster (alignment length = 12,177 aa). A ML phylogenetic tree was inferred with the LG+C60+F+R model with an ultrafast bootstrap approximation (left) and SH-like approximate likelihood tests (right), each run with 1000 replicates. The tree was artificially rooted with the DPANN archaea and the grey arrow shows the root inferred with minimal ancestor deviation rooting (Tria et al., 2017). Scale bar: Average number of substitutions per site. Tree statistics for tree number 25 can be found in Supplementary Data 6.



127 species  
 50% top ranked proteins (n=57)  
 removal of fast-evolving sites  
 SlowFaster, 20% site removal  
 10,856 amino acids  
 Iqtree, LG+C60+F+R

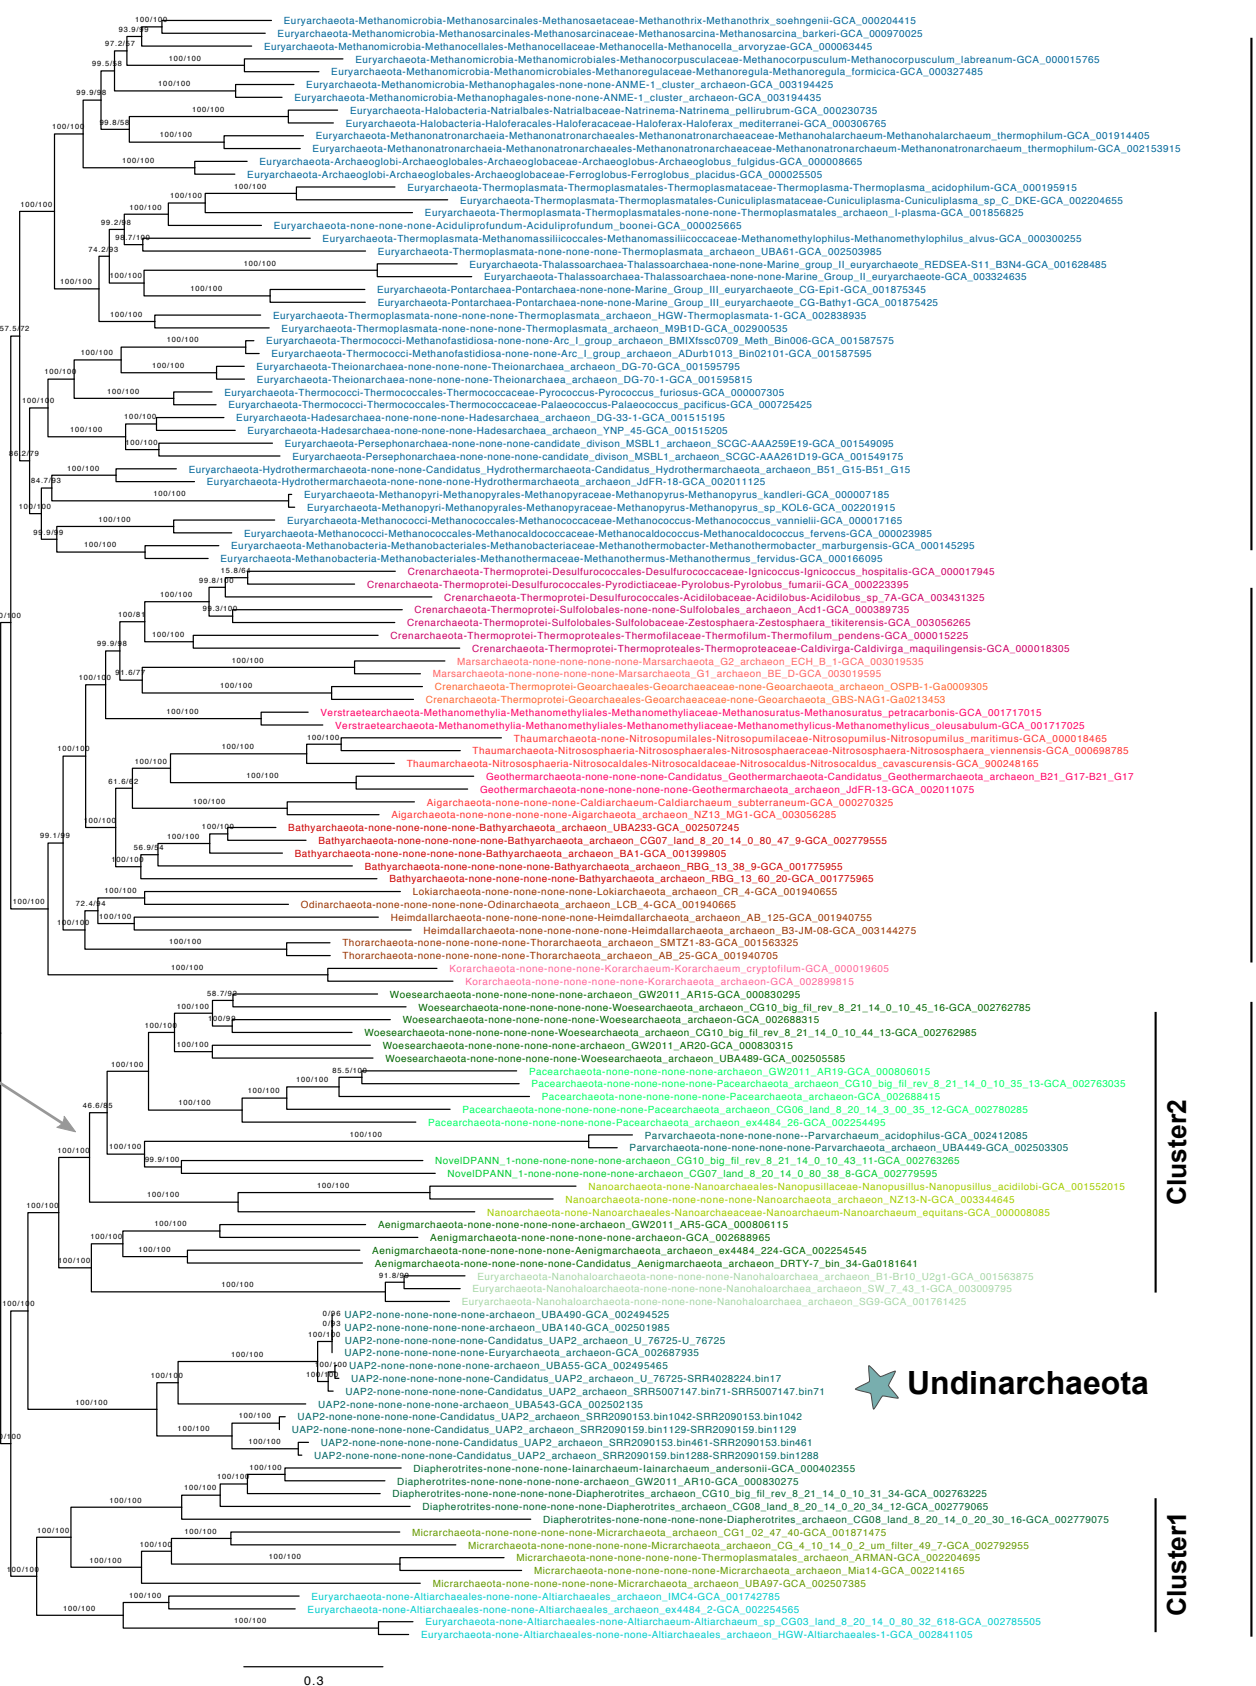

Euryarchaeota

TACK + Asgard

Cluster2

DPANN

Cluster1

★ Undinarchaeota

Supplementary Figure 33 | Phylogenetic placement of Undinarchaeota based on an alignment generated with the 50% top ranked proteins (n=57) and the 127 species set. 20% of the fast-evolving sites were removed from the alignment with SlowFaster (alignment length = 10,856 aa). A ML phylogenetic tree was inferred with the LG+C60+F+R model with an ultrafast bootstrap approximation (left) and SH-like approximate likelihood tests (right), each run with 1000 replicates. The tree was artificially rooted with the DPANN archaea and the grey arrow shows the root position inferred with minimal ancestor deviation rooting (Tria et al., 2017). Scale bar: Average number of substitutions per site. Tree statistics for tree number 26 can be found in Supplementary Data 6.

127 species  
 50% top ranked proteins (n=57)  
 removal of fast-evolving sites  
 SlowFaster, 30% site removal  
 9,538 amino acids  
 Iqtree, LG+C60+F+R

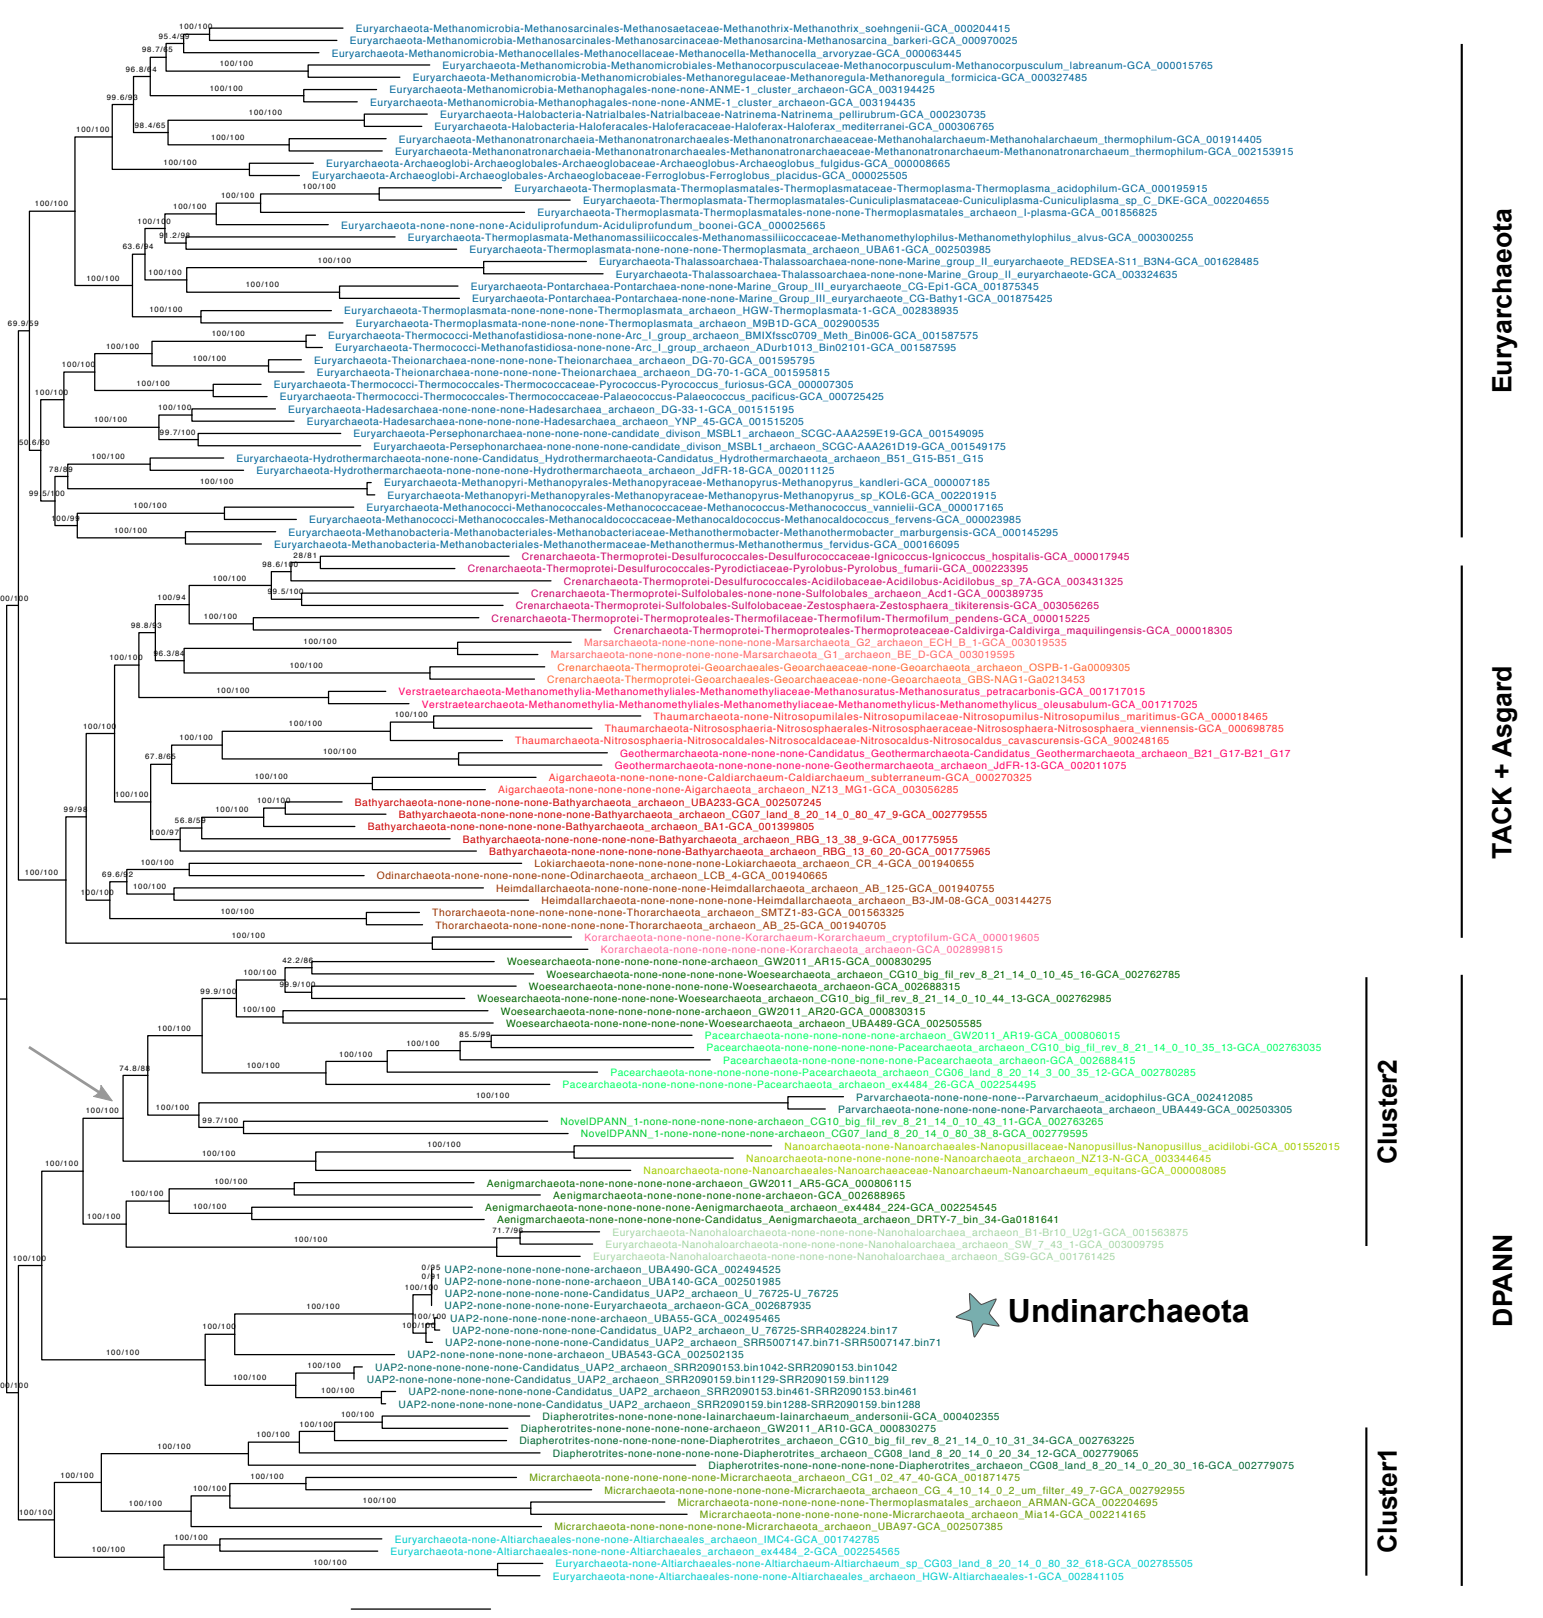

**Supplementary Figure 34 | Phylogenetic placement of Undinarchaeota based on an alignment generated with the 50% top ranked proteins (n=57) and the 127 species set.** 30% of the fast-evolving sites were removed from the alignment with SlowFaster (alignment length = 9,538 aa). A ML phylogenetic tree was inferred with the LG+C60+F+R model with an ultrafast bootstrap approximation (left) and SH-like approximate likelihood tests (right), each run with 1000 replicates. The tree was artificially rooted with the DPANN archaea and the grey arrow shows the root position inferred with minimal ancestor deviation rooting (Tria et al., 2017). Scale bar: Average number of substitutions per site. Tree statistics for tree number 27 can be found in Supplementary Data 6.

127 species

50% top ranked proteins (n=57)

removal of fast-evolving sites  
SlowFaster, 40% site removal

8,083 amino acids

Iqtree, LG+C60+F+R

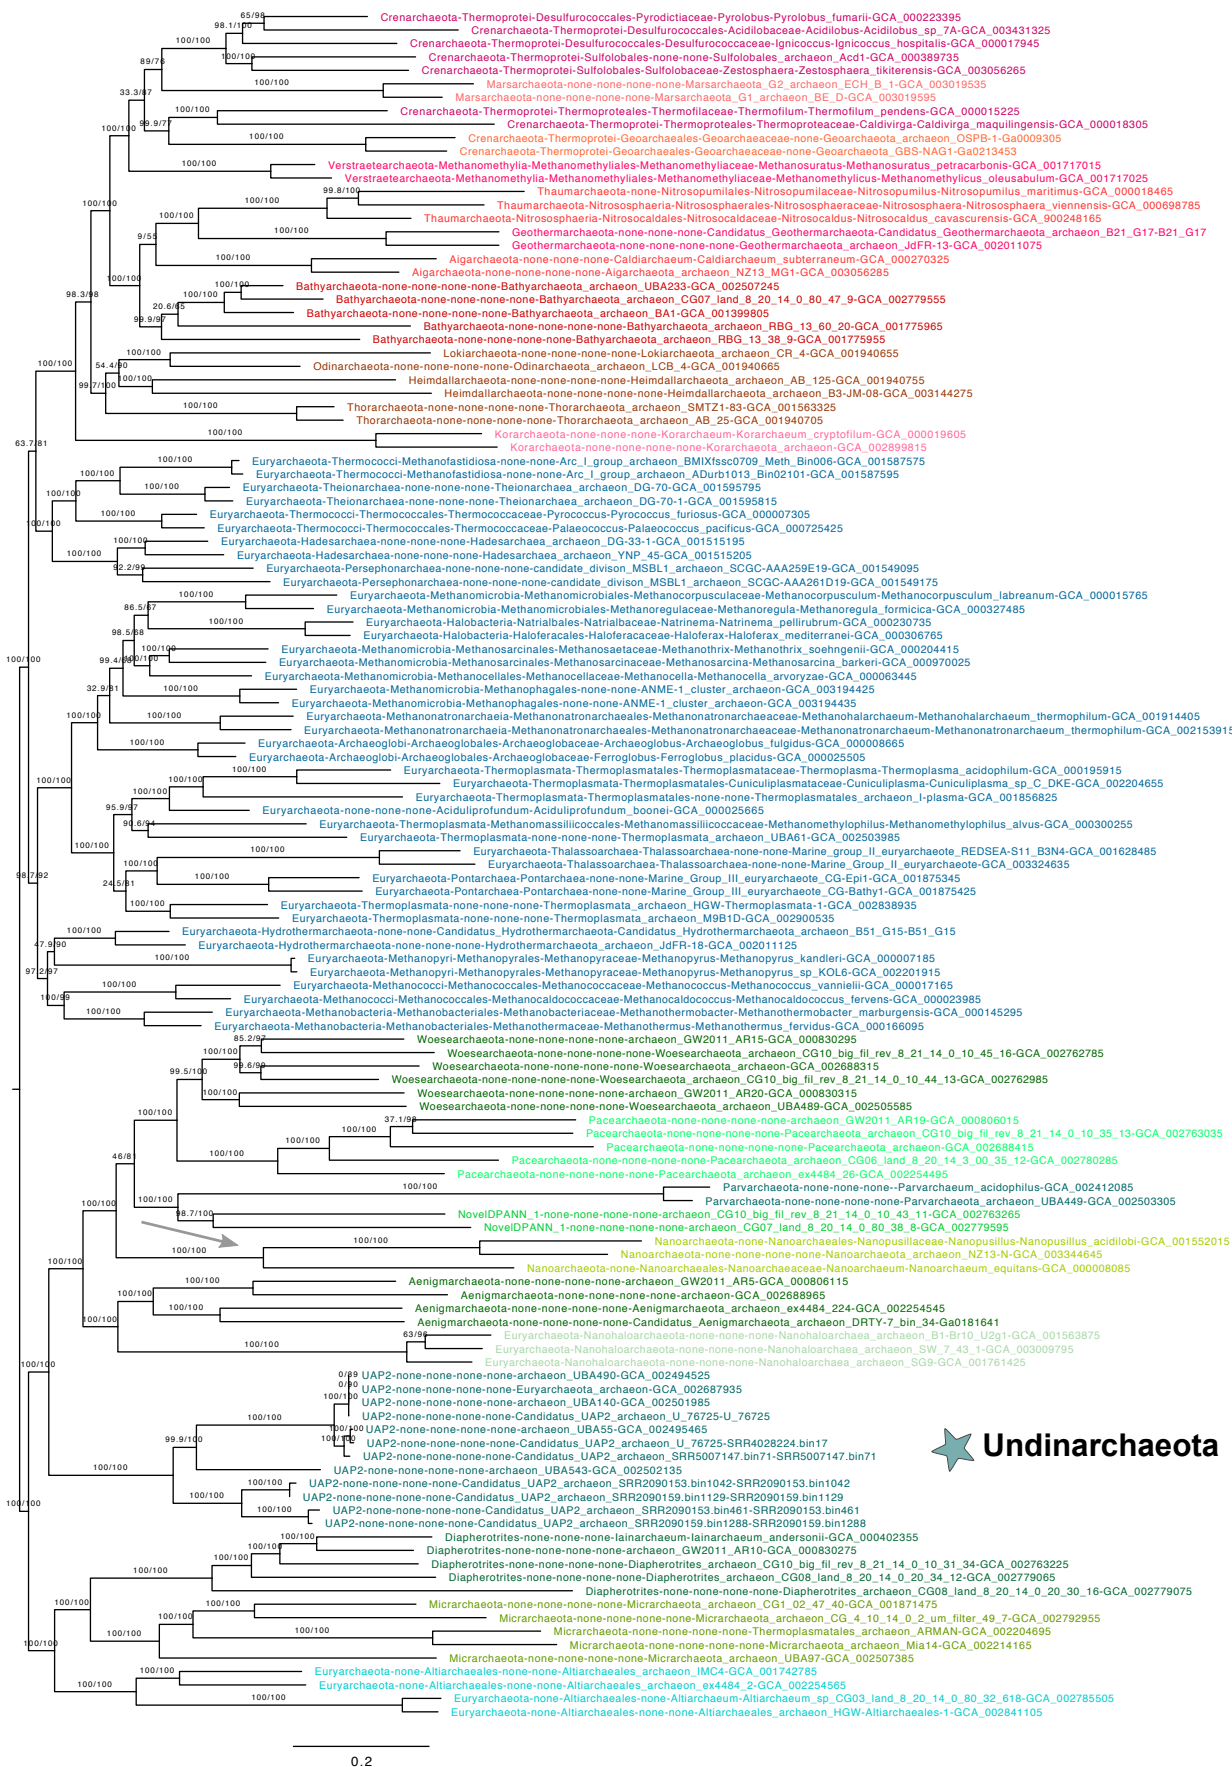

TACK + Asgard

Euryarchaeota

Cluster2

DPANN

Cluster1

★ Undinarchaeota

**Supplementary Figure 35 | Phylogenetic placement of Undinarchaeota based on an alignment generated with the 50% top ranked proteins (n=57) and the 127 species set. 40% of the fast-evolving sites were removed from the alignment with SlowFaster (alignment length = 8,083 aa). A ML phylogenetic tree was inferred with the LG+C60+F+R model with an ultrafast bootstrap approximation (left) and SH-like approximate likelihood tests (right), each run with 1000 replicates. The tree was artificially rooted with the DPANN archaea and the grey arrow points to the root position as inferred by minimal ancestor deviation rooting (Tria et al., 2017). Scale bar: Average number of substitutions per site. Tree statistics for tree number 28 can be found in Supplementary Data 6.**

127 species  
 50% top ranked proteins (n=57)  
 removal of heterogeneous sites  
 Pruner, 10% site removal  
 12,147 amino acids  
 Iqtree, LG+C60+F+R

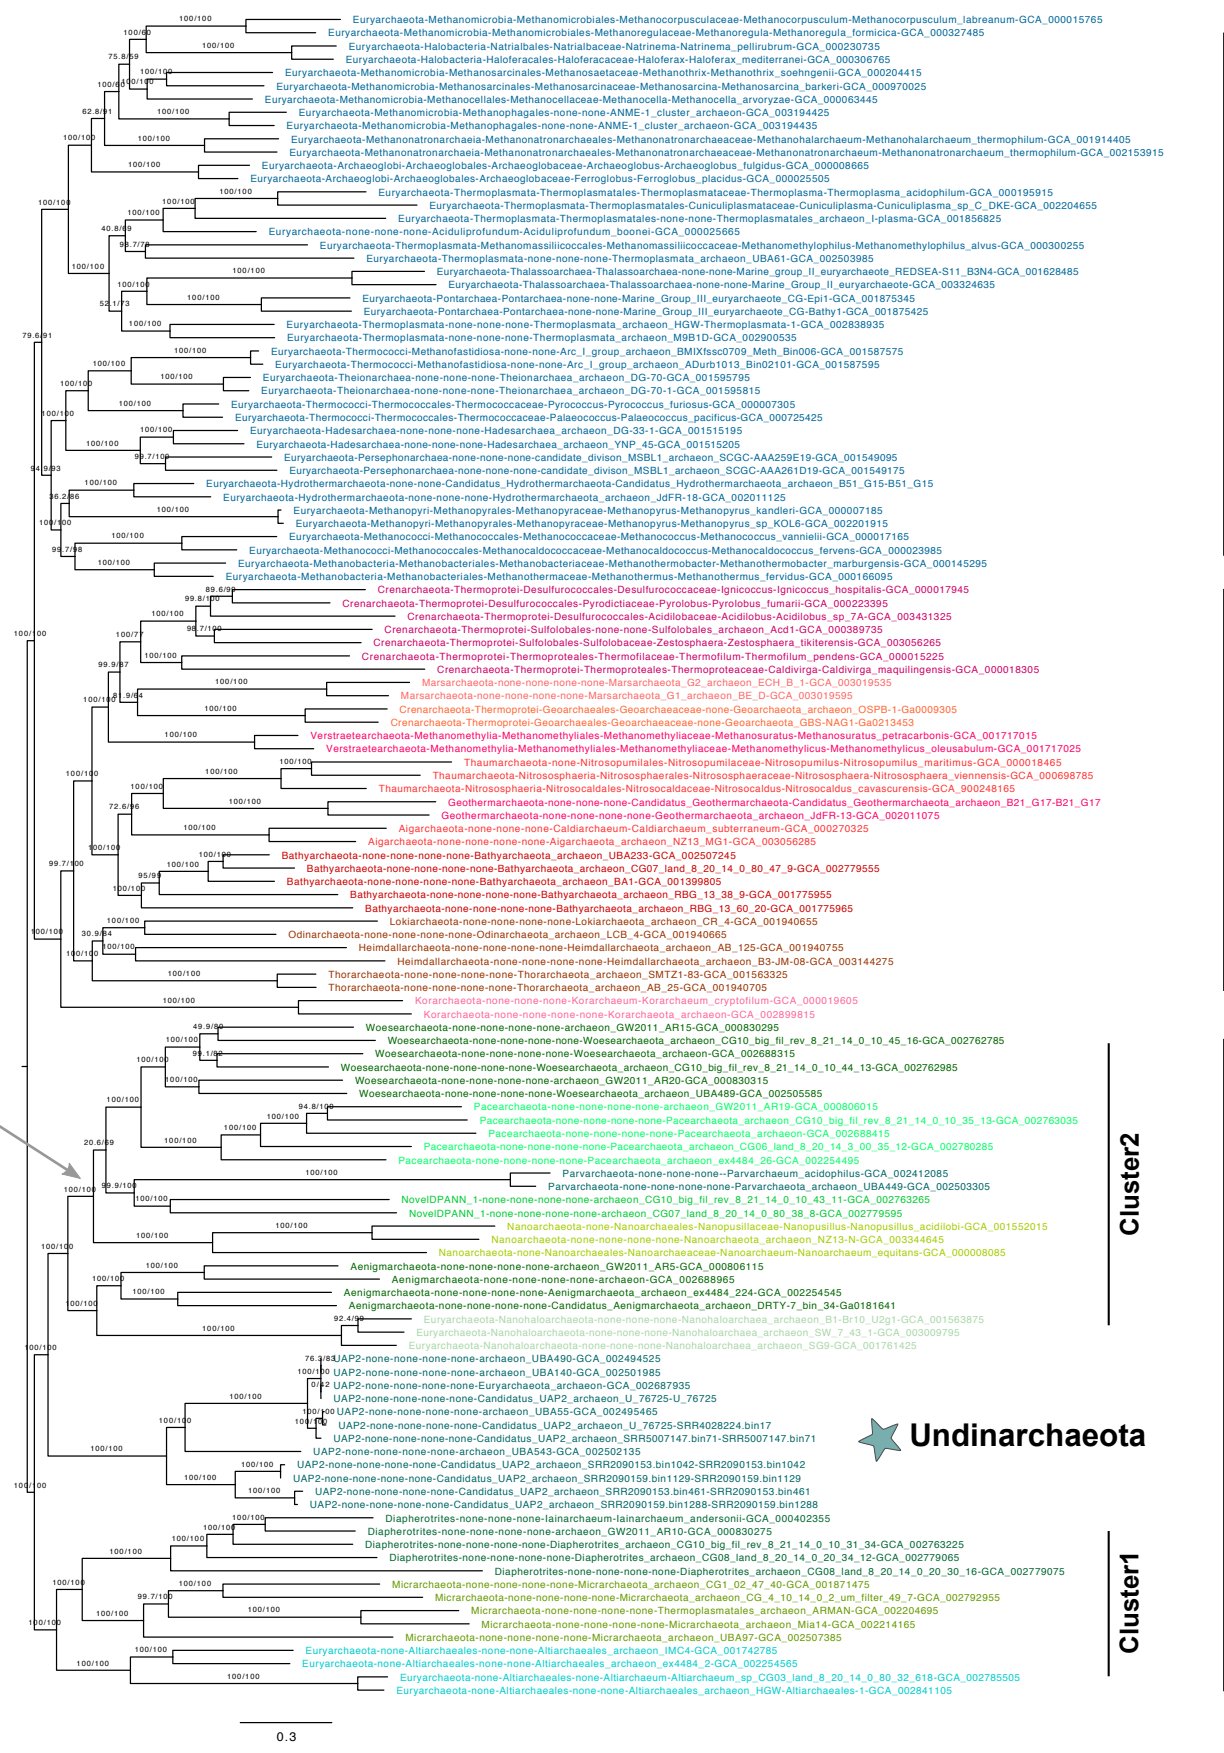

Euryarchaeota

TACK + Asgard

Cluster2

DPANN

Cluster1

★ Undinararchaeota

**Supplementary Figure 36 | Phylogenetic placement Undinararchaeota based on an alignment generated with the 50% top ranked proteins (n=57) and the 127 species set.** 10% of the heterogeneous sites were removed from the alignment using the chi2 test (alignment length = 12,147 aa). A ML phylogenetic tree was inferred with the LG+C60+F+R model with an ultrafast bootstrap approximation (left) and SH-like approximate likelihood tests (right), each run with 1000 replicates. The tree was artificially rooted with the DPANN archaea and the grey arrow shows the root position inferred with minimal ancestor deviation rooting (Tria et al., 2017). Scale bar: Average number of substitutions per site. Tree statistics for tree number 29 can be found in Supplementary Data 6.



127 species  
 50% top ranked proteins (n=57)  
 removal of heterogeneous sites  
 Pruner, 20% site removal  
 10,797 amino acids  
 Iqtree, LG+C60+F+R

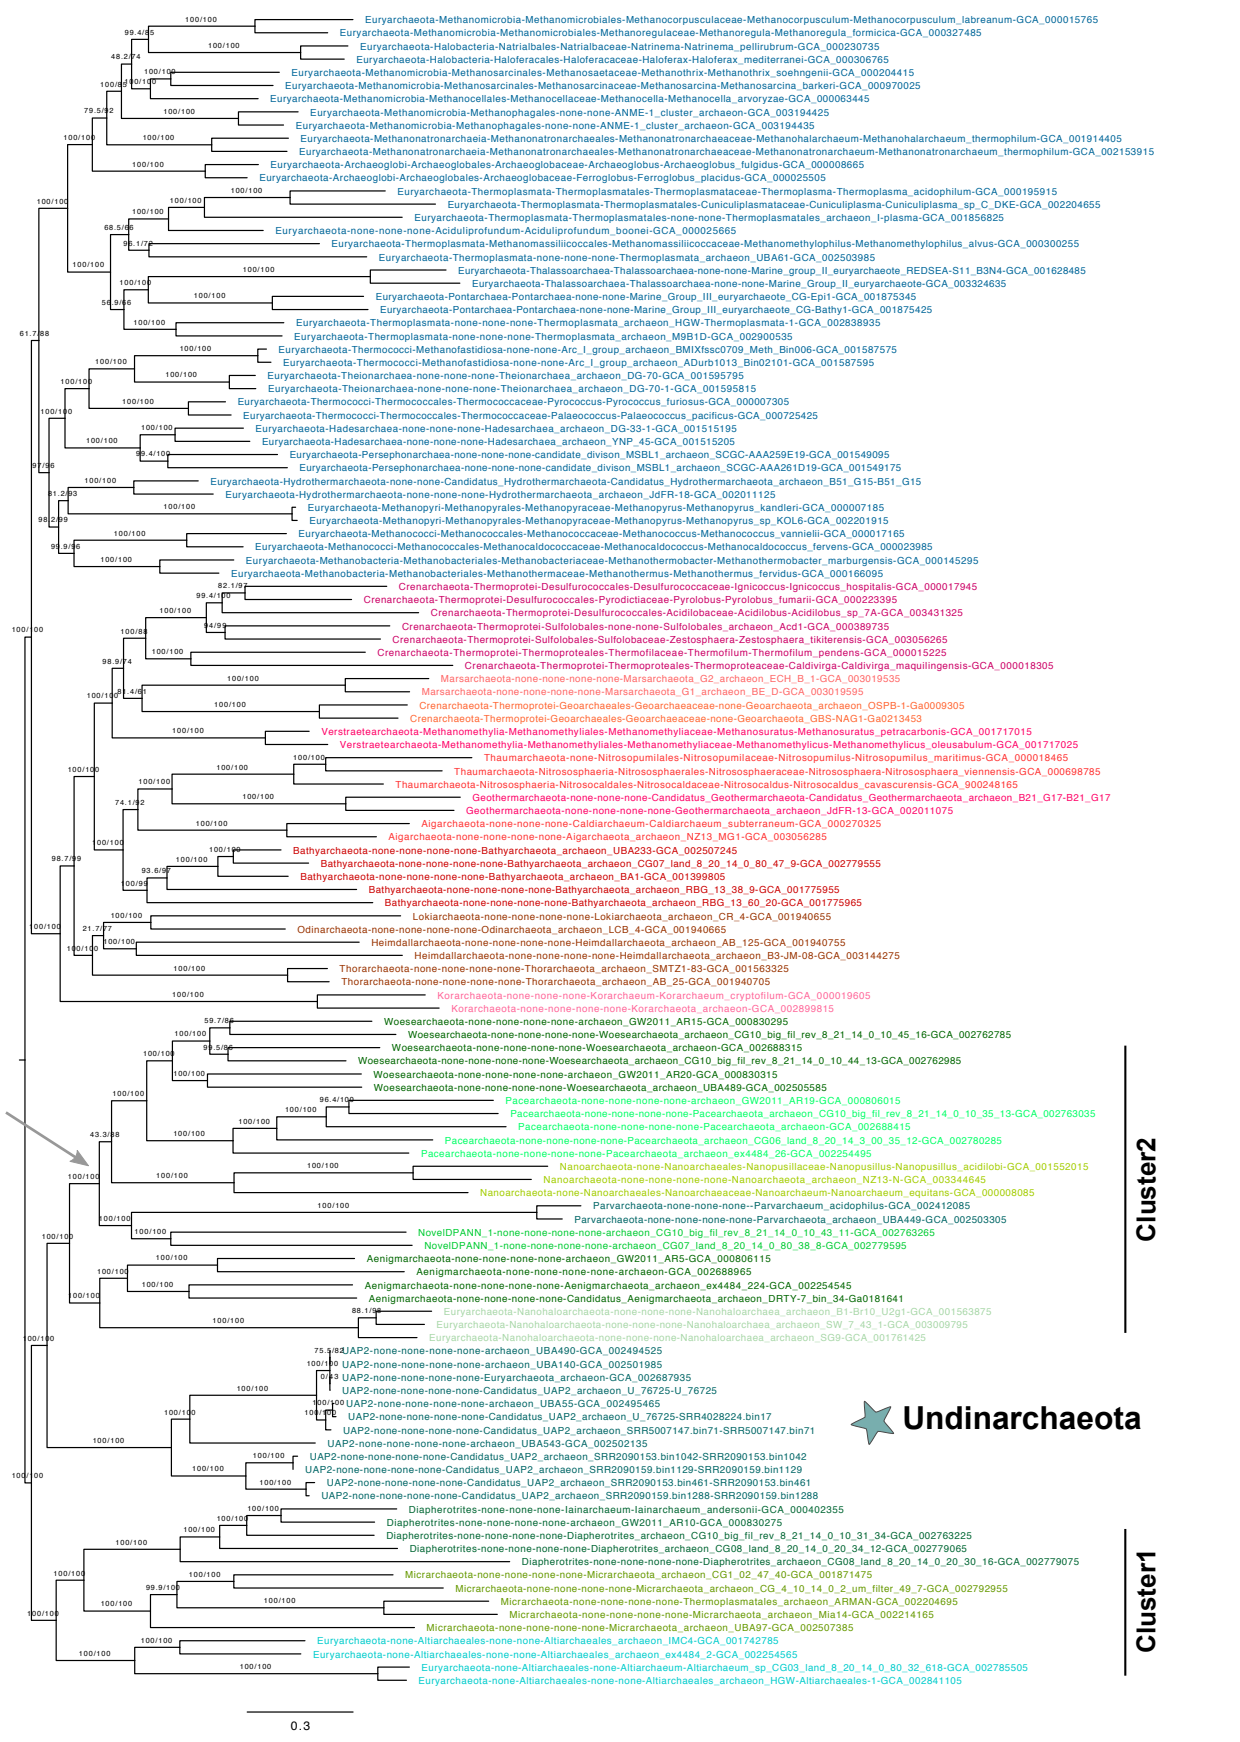

Supplementary Figure 37 | Phylogenetic placement of Undinarchaeota based on an alignment generated with the 50% top ranked proteins (n=57) and the 127 species set. 20% of the heterogeneous sites were removed from the alignment with the chi2 test (alignment length = 10,797 aa). A ML phylogenetic tree was inferred with the LG+C60+F+R model with an ultrafast bootstrap approximation (left) and SH-like approximate likelihood tests (right), each run with 1000 replicates. The tree was artificially rooted with the DPANN archaea and the grey arrow shows the root position inferred with minimal ancestor deviation rooting (Tria et al., 2017). Scale bar: Average number of substitutions per site. Tree statistics for tree number 30 can be found in Supplementary Data 6.

127 species  
 50% top ranked proteins (n=57 genes)  
 removal of heterogeneous sites  
 Pruner, 20% site removal  
 9,665 amino acids  
 Iqtree, NONREV+R10

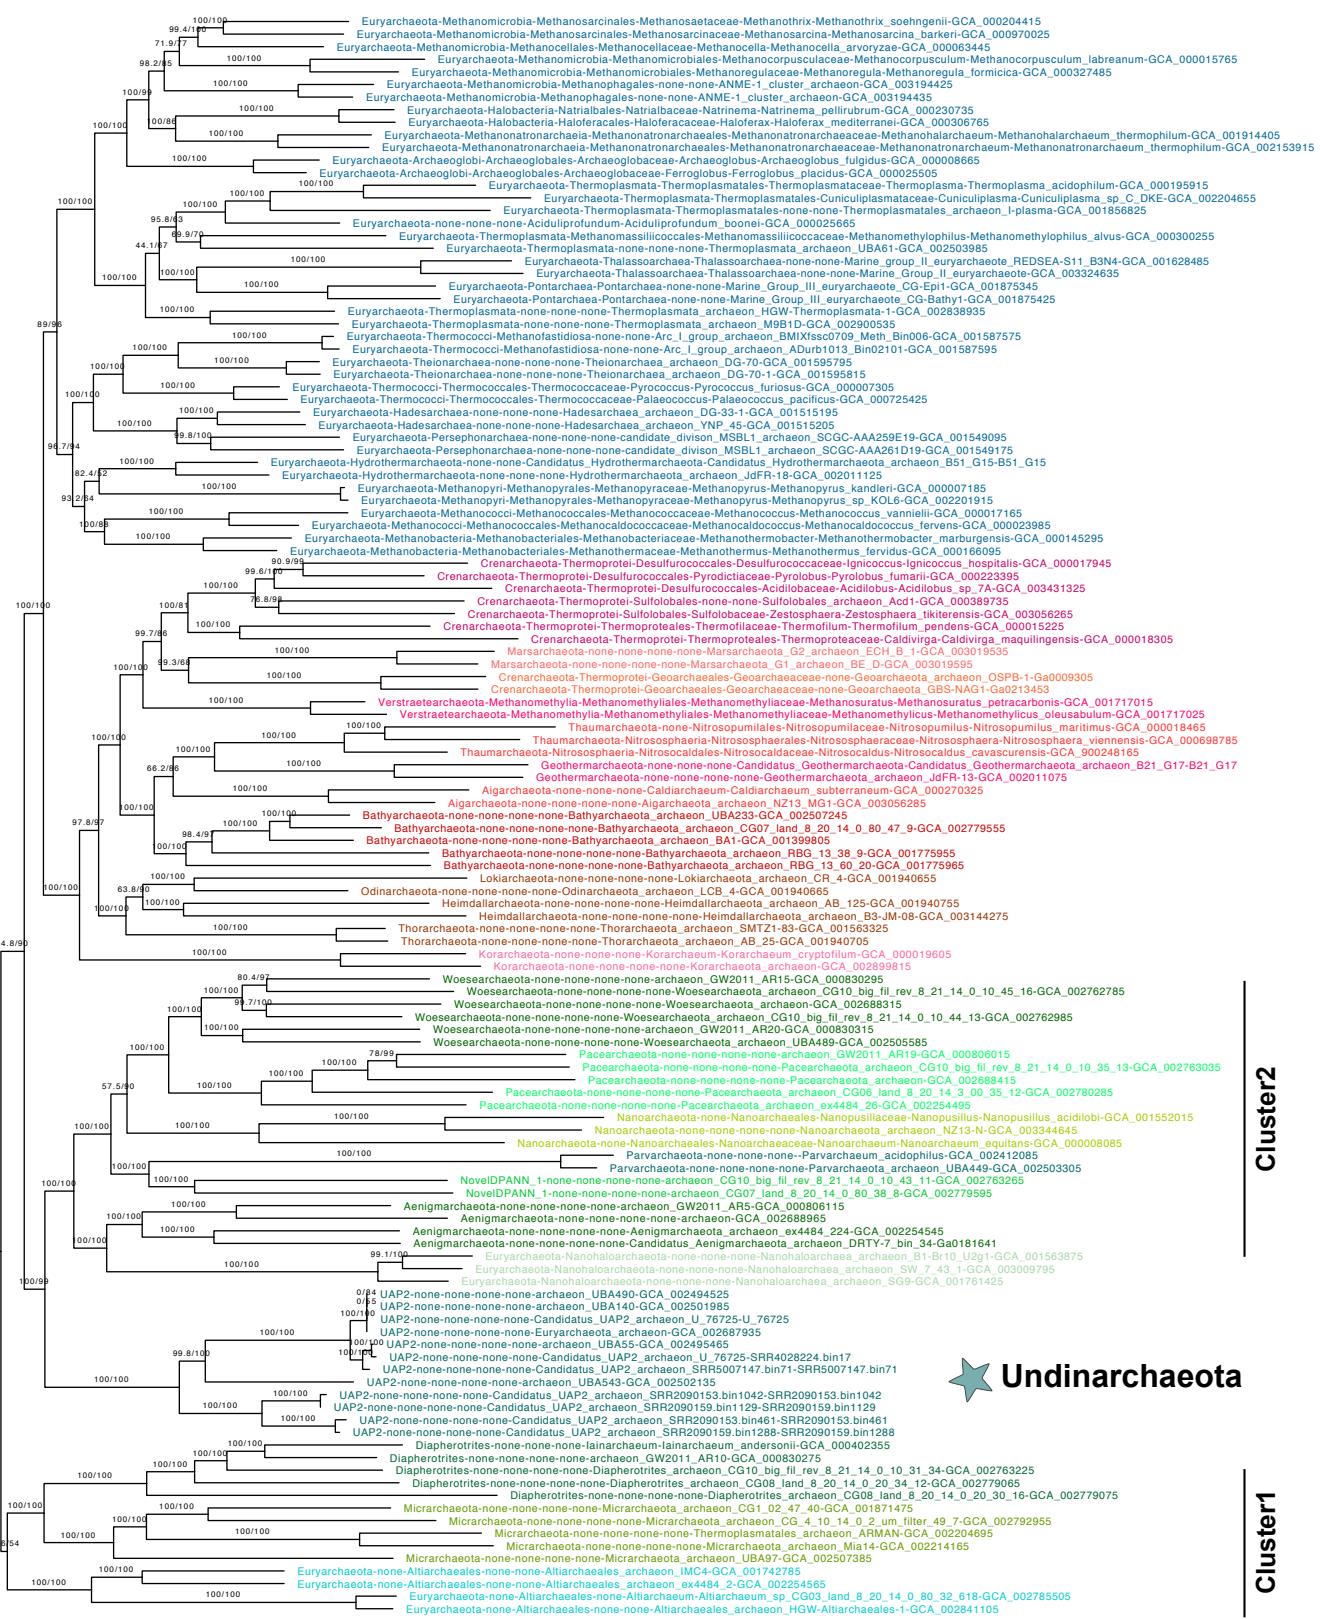

Euryarchaeota

TACK + Asgard

Cluster2

DPANN

Cluster1

★ Undinarchaeota

Supplementary Figure 38 | Phylogenetic placement of Undinarchaeota based on an alignment generated with the 50% top ranked proteins (n=57) and the 127 species set. 20% of the heterogeneous sites were removed from the alignment with the chi2 test (alignment length = 9,665 aa). A ML phylogenetic tree was inferred with the NONREV model with an ultrafast bootstrap approximation (left) and SH-like approximate likelihood tests (right), each run with 1000 replicates. The tree was rooted using the non-reversible model in iqtree. Scale bar: Average number of substitutions per site. Tree statistics for tree number 31 can be found in Supplementary Data 6.

127 species  
 50% top ranked proteins (n=57)  
 removal of heterogeneous sites  
 Pruner, 30% site removal  
 9,448 amino acids  
 Iqtree, LG+C60+F+R

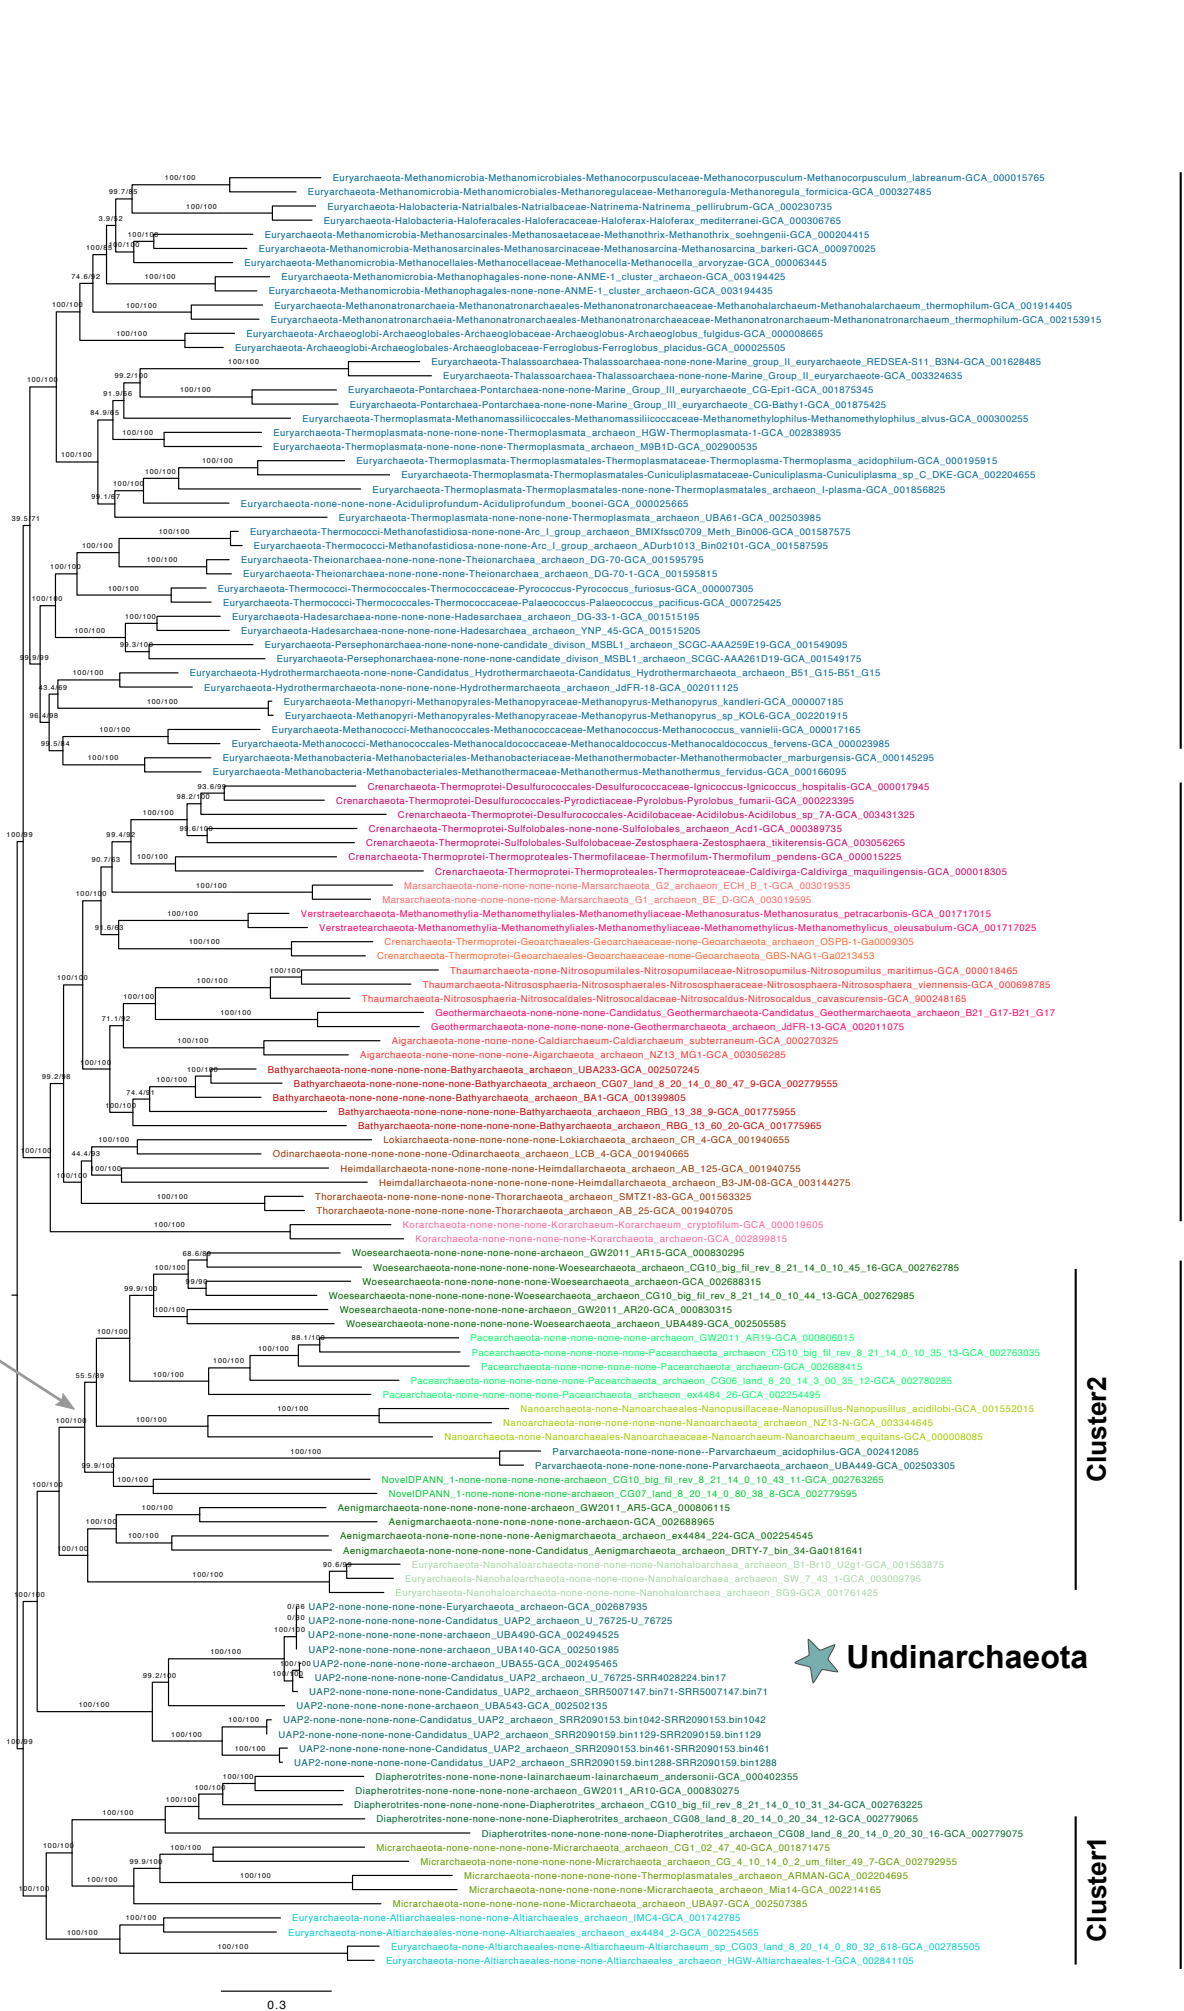

Euryarchaeota

TACK + Asgard

Cluster2

Cluster1

DPANN

★ Undinarchaeota

**Supplementary Figure 39 | Phylogenetic placement of Undinarchaeota based on an alignment generated with the 50% top ranked proteins (n=57) and the 127 species set.** 30% of the heterogeneous sites were removed from the alignment using the chi2 test (alignment length = 9,448 aa). A ML phylogenetic tree was inferred with the LG+C60+F+R model with an ultrafast bootstrap approximation (left) and SH-like approximate likelihood tests (right), each run with 1000 replicates. The tree was artificially rooted with the DPANN archaea and the grey arrow shows the root position inferred with minimal ancestor deviation rooting (Tria et al., 2017). Scale bar: Average number of substitutions per site. Tree statistics for tree number 32 can be found in Supplementary Data 6.



127 species

50% top ranked proteins (n=57)

removal of heterogeneous sites  
Pruner, 40% site removal

8,098 amino acids

Iqtree, LG+C60+F+R

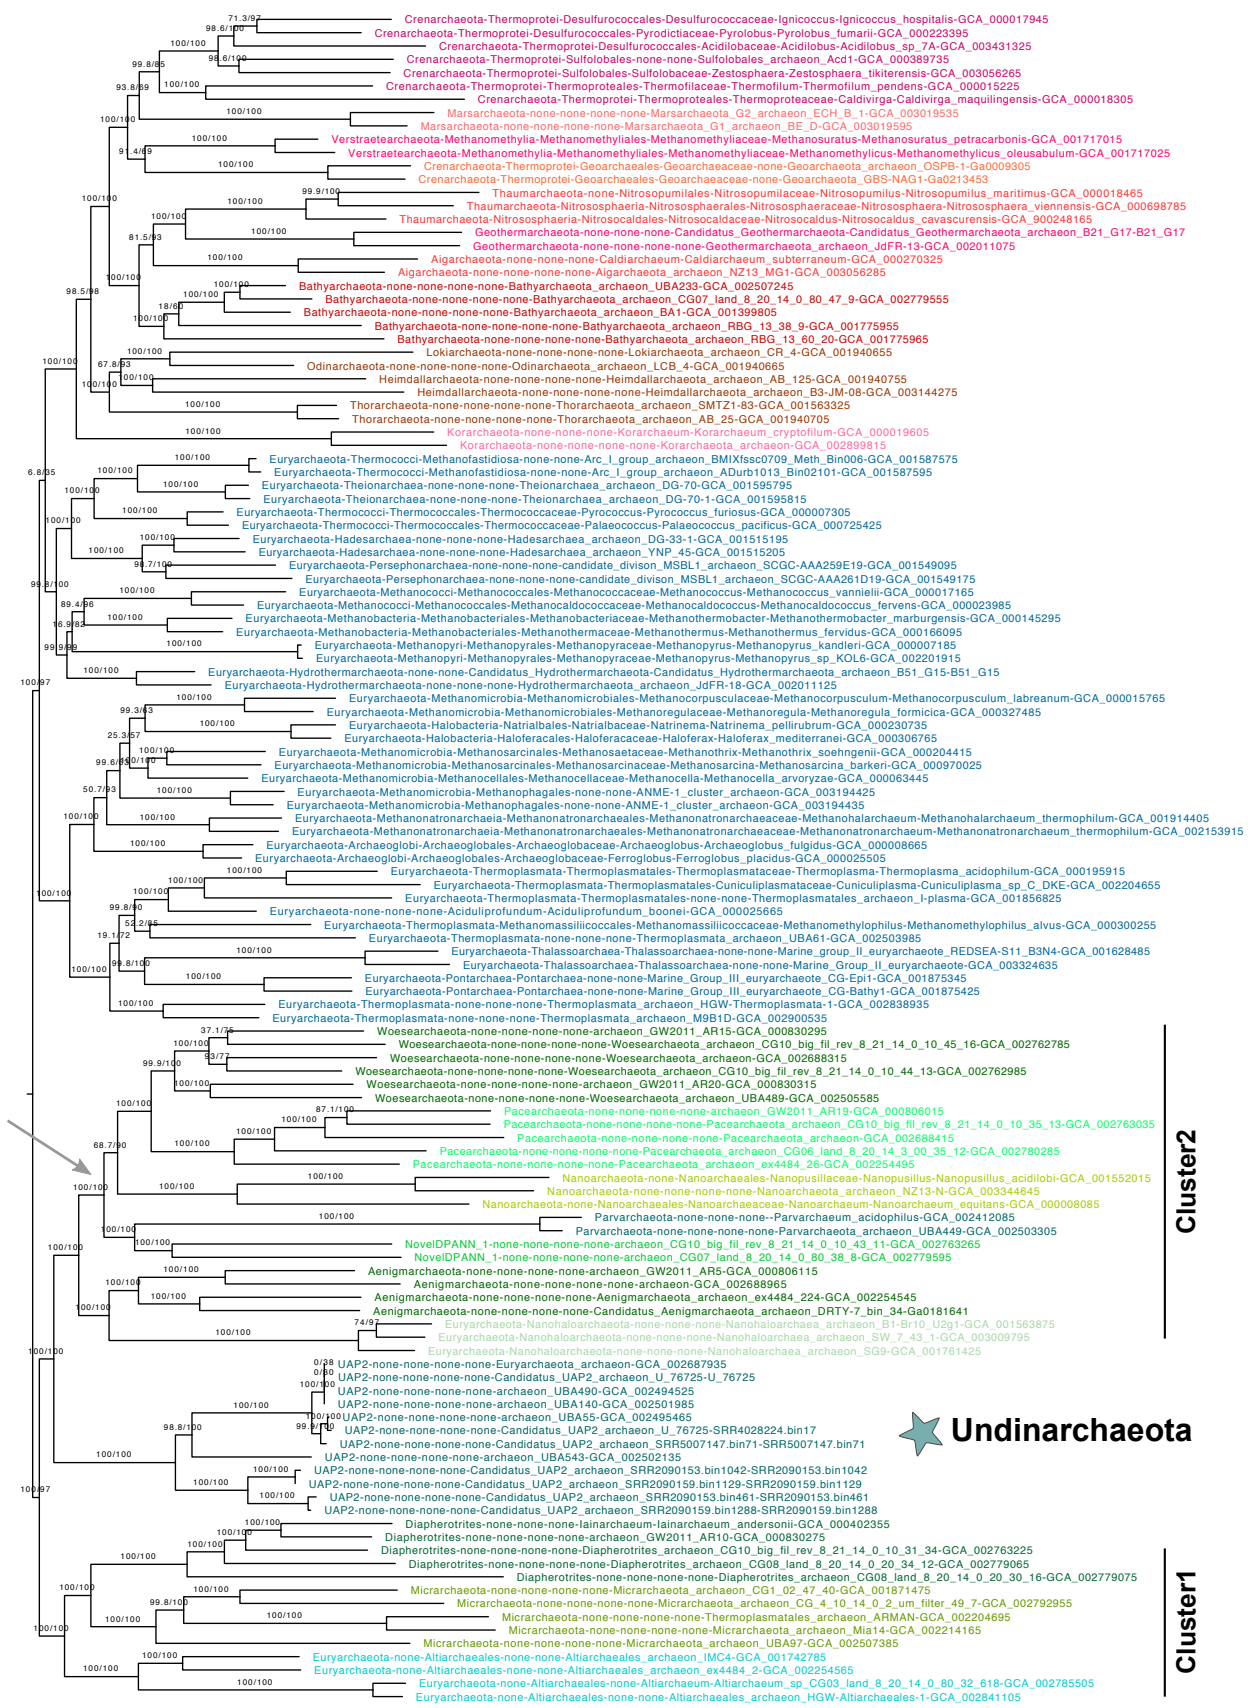

TACK + Asgard

Euryarchaeota

Cluster2

DPANN

★ Undinarchaeota

**Supplementary Figure 40 | Phylogenetic placement of Undinarchaeota based on an alignment generated with the 50% top ranked proteins (n=57) and the 127 species set.** 40% of the heterogeneous sites were removed from the alignment using the chi2 test (alignment length = 8,098 aa). A ML phylogenetic tree was inferred with the LG+C60+F+R model with an ultrafast bootstrap approximation (left) and SH-like approximate likelihood tests (right), each run with 1000 replicates. The tree was artificially rooted with the DPANN archaea and the grey arrow shows the root position inferred with minimal ancestor deviation rooting. Scale bar: Average number of substitutions per site. Tree statistics for tree number 33 can be found in Supplementary Data 6.

127 species  
 50% top ranked proteins (n=57)  
 removal of heterogeneous sites Pruner, 40% site removal  
 8,098 amino acids  
 Iqtree, NONREV

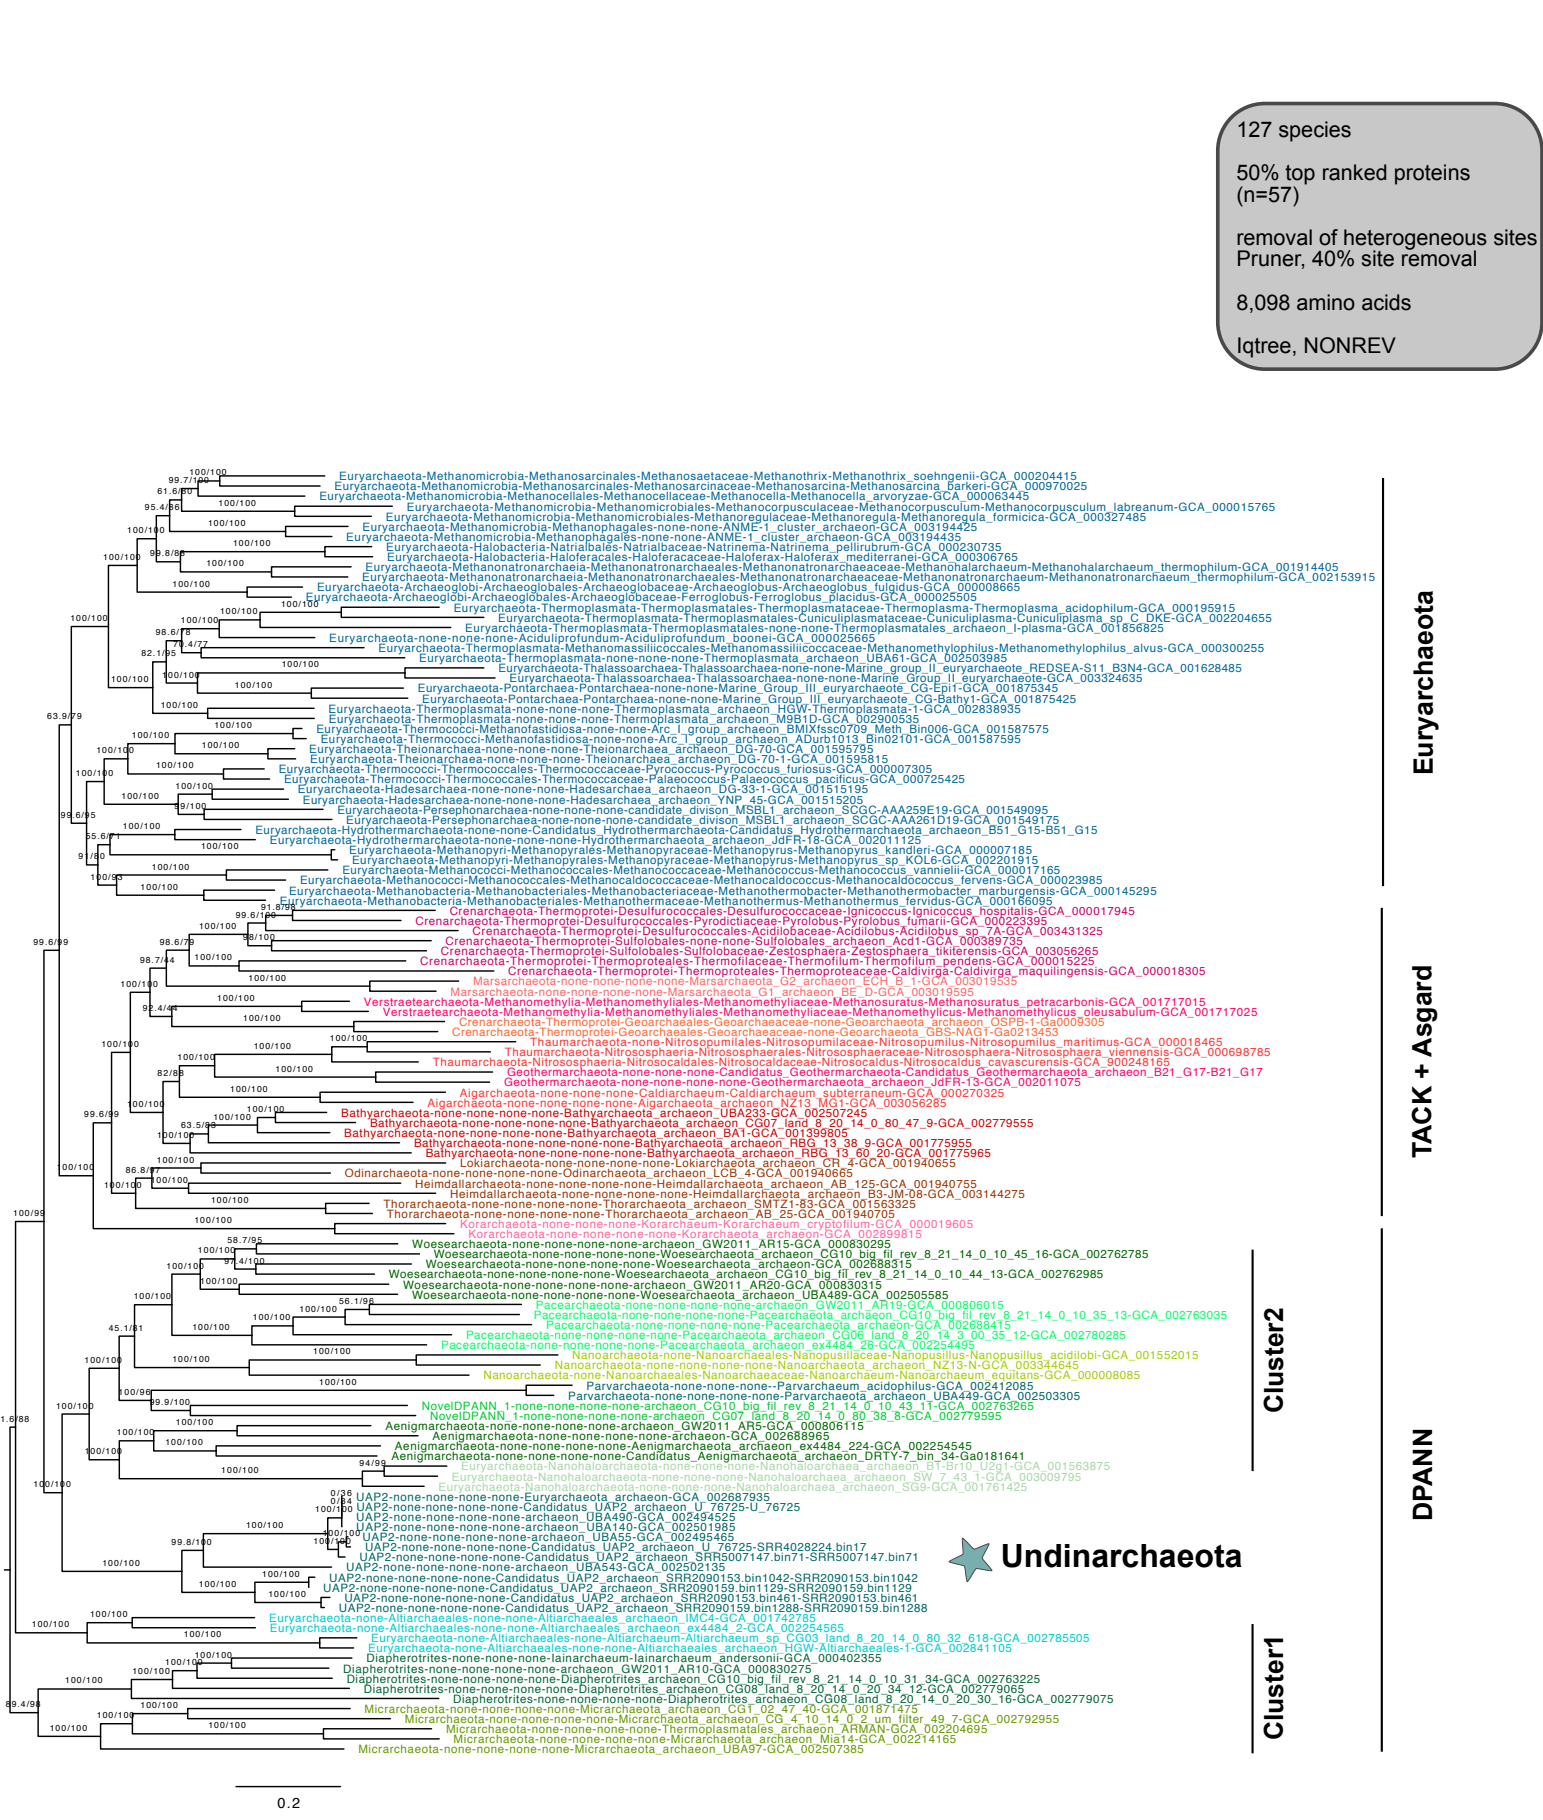

Supplementary Figure 41 | Phylogenetic placement of Undinarchaeota based on an alignment generated with the 50% top ranked proteins (n=57) and the 127 species set. 40% of the heterogeneous sites were removed from the alignment using the chi2 test (alignment length = 8,098 aa). A ML phylogenetic tree was inferred with the NONREV model with an ultrafast bootstrap approximation (left) and SH-like approximate likelihood tests (right), each run with 1000 replicates. The tree was rooted with the non-reversible model in iqtree. Scale bar: Average number of substitutions per site. Tree statistics for run number 34 can be found in Supplementary Data 6.

127 species  
 50% top ranked proteins (n=57)  
 removal of heterogeneous sites  
 Pruner, 40% site removal  
 8,098 characters  
 Bayes, CAT + GTR

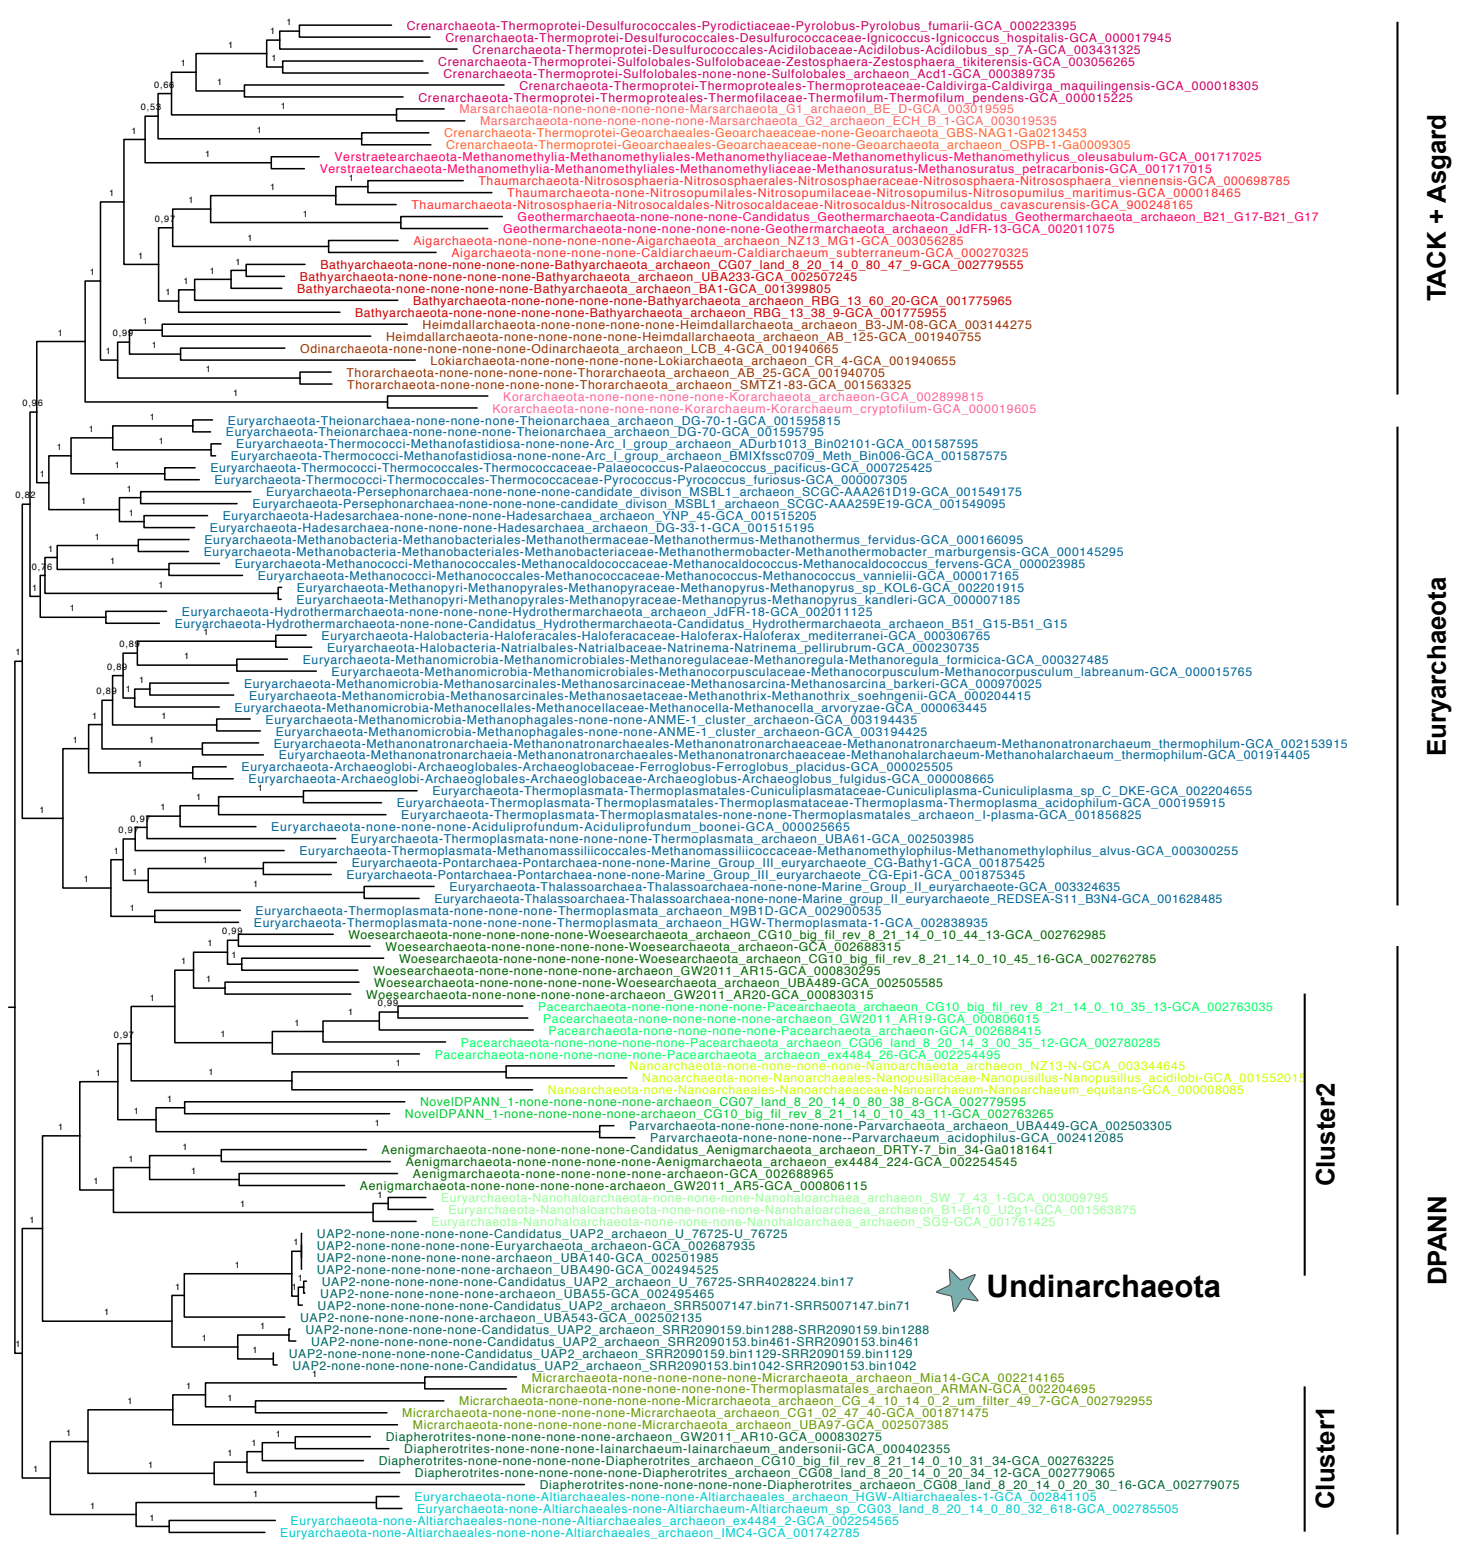

**Supplementary Figure 42 | Phylogenetic placement of Undinarchaeota based on an alignment generated with the 50% top ranked proteins (n=57) and the 127 species set.** 40% of heterogeneous sites were removed from the alignment with the chi2 test. A Bayesian phylogenetic tree was inferred with the CAT+GTR model run with two chains for 6,788 cycles (25% burn-in). The tree was artificially rooted with the DPANN archaea and the grey arrow shows the root inferred with minimal ancestor deviation rooting (Tria et al., 2017). Scale bar: Average number of substitutions per site. Tree statistics for tree number 35 can be found in Supplementary Data 6.



364 species  
 75% top ranked proteins (n=84)  
 trimmed alignment (BMGE)  
 17,191 amino acids  
 Iqtree, LG+C60+F+R

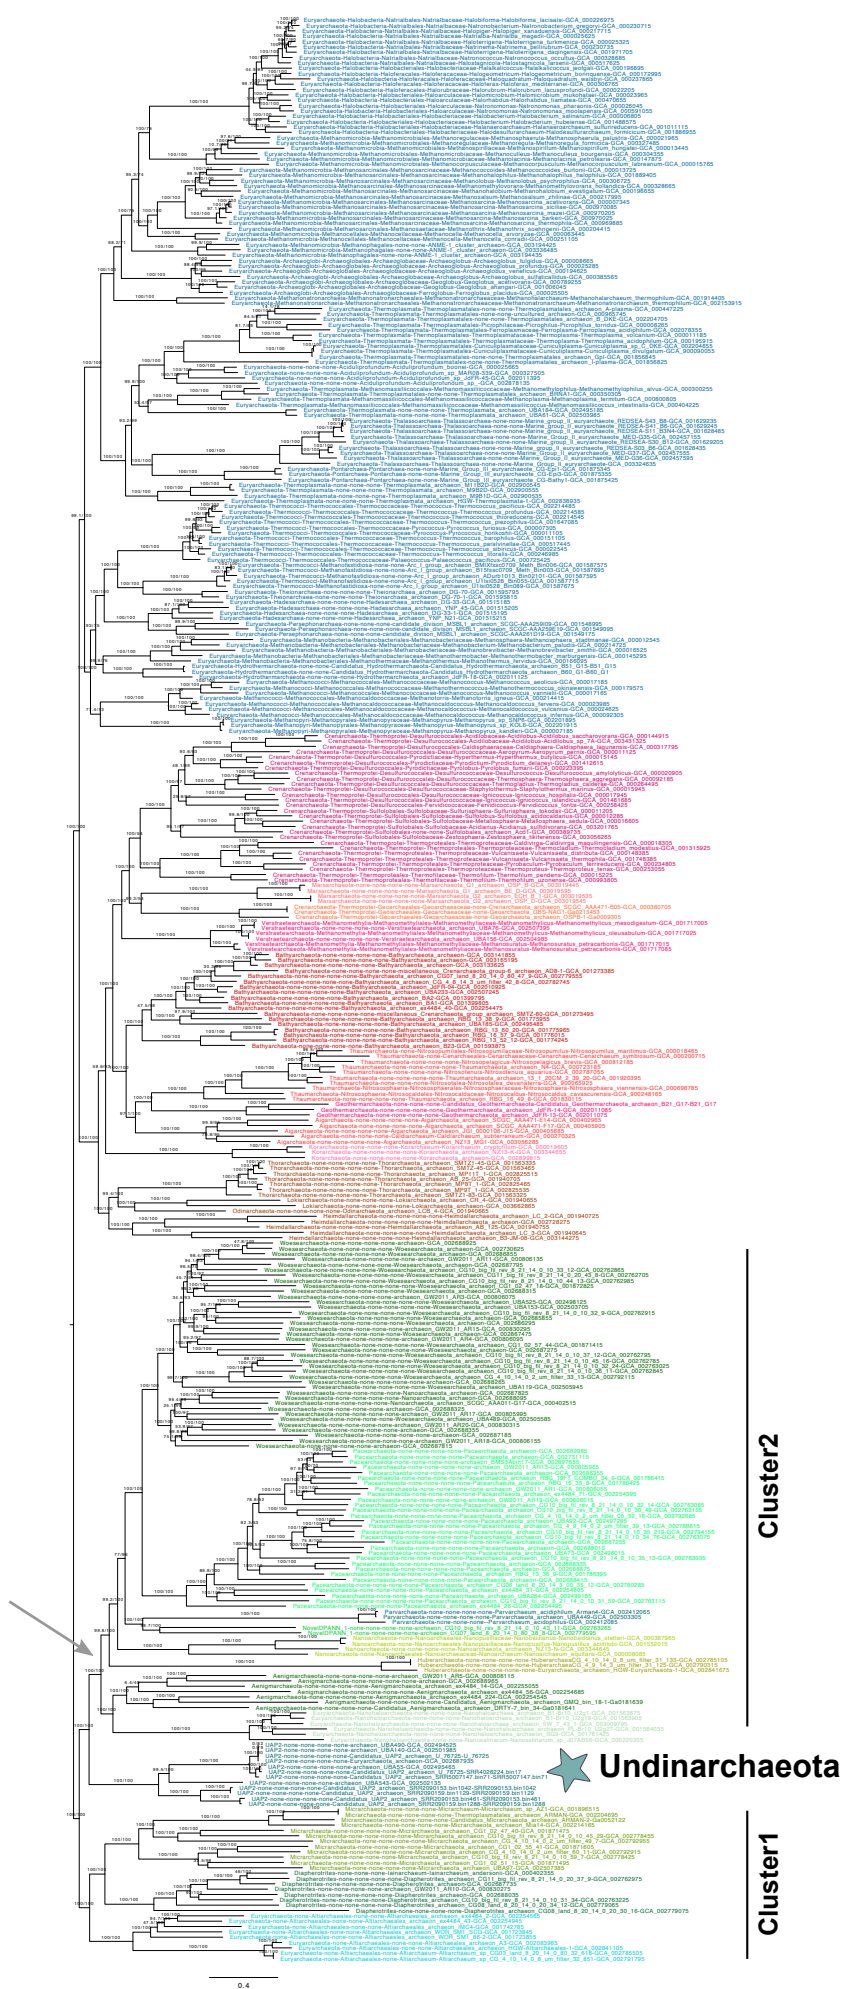

Euryarchaeota

TACK + Asgard

Cluster2

DPANN

Cluster1

★ Undinarchaeota

**Supplementary Figure 43 | Phylogenetic placement of Undinarchaeota based on an alignment generated with the 75% top ranked proteins (n=84) and the 364 species set.** The alignment was trimmed with BMGE (alignment length = 17,191 aa). A ML phylogenetic tree was inferred with the LG+C60+F+R model with an ultrafast bootstrap approximation (left) and SH-like approximate likelihood tests (right), each run with 1000 replicates. The tree was artificially rooted with the DPANN archaea and the grey arrow shows the root inferred with minimal ancestor deviation rooting (Tria et al., 2017). Scale bar: Average number of substitutions per site. Tree statistics for tree number 36 can be found in Supplementary Data 6.

364 species  
 75% top ranked proteins (n=84)  
 trimmed alignment (BMGE)  
 SR4 decoded  
 17,191 characters  
 Iqtree, LG+C60+F+R

TACK + Asgard

Euryarchaeota

Cluster2

DPANN

Cluster1

★ Undinarchaeota

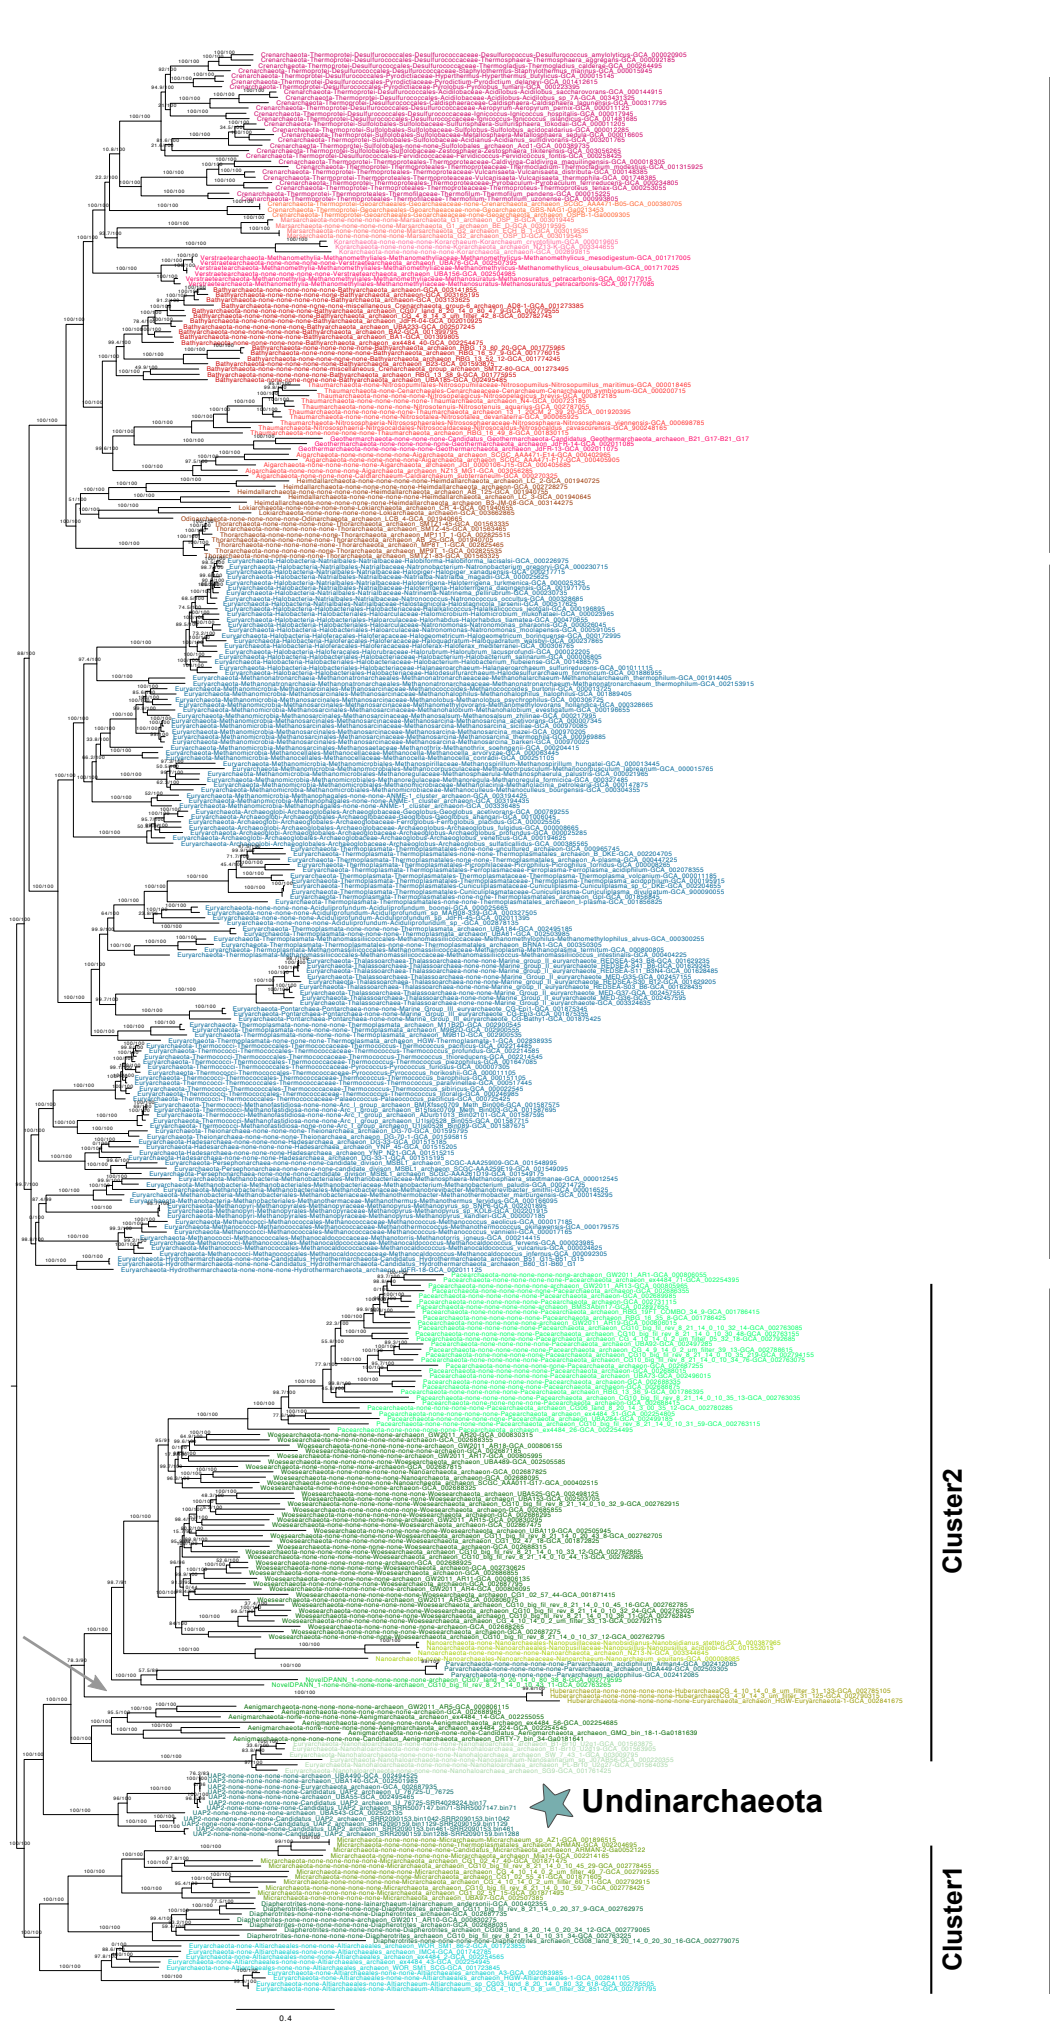

**Supplementary Figure 44 | Phylogenetic placement of Undinarchaeota based on an alignment generated with the 75% top ranked proteins (n=84) and the 364 species set.** The alignment was trimmed with BMGE and decoded into 4 character states (SR4 decoding; alignment length = 17,191 characters). A ML phylogenetic tree was inferred with the LG+C60+F+R model with an ultrafast bootstrap approximation (left) and SH-like approximate likelihood tests (right), each run with 1000 replicates. The tree was artificially rooted with the DPANN archaea and the grey arrow shows the root as inferred with minimal ancestor deviation rooting (Tria et al., 2017). Scale bar: Average number of substitutions per site. Tree statistics for tree number 37 can be found in Supplementary Data 6.

127 species  
 75% top ranked proteins (n=85)  
 trimmed alignment (BMGE)  
 18,824 amino acids  
 Iqtree, LG+C60+F+R

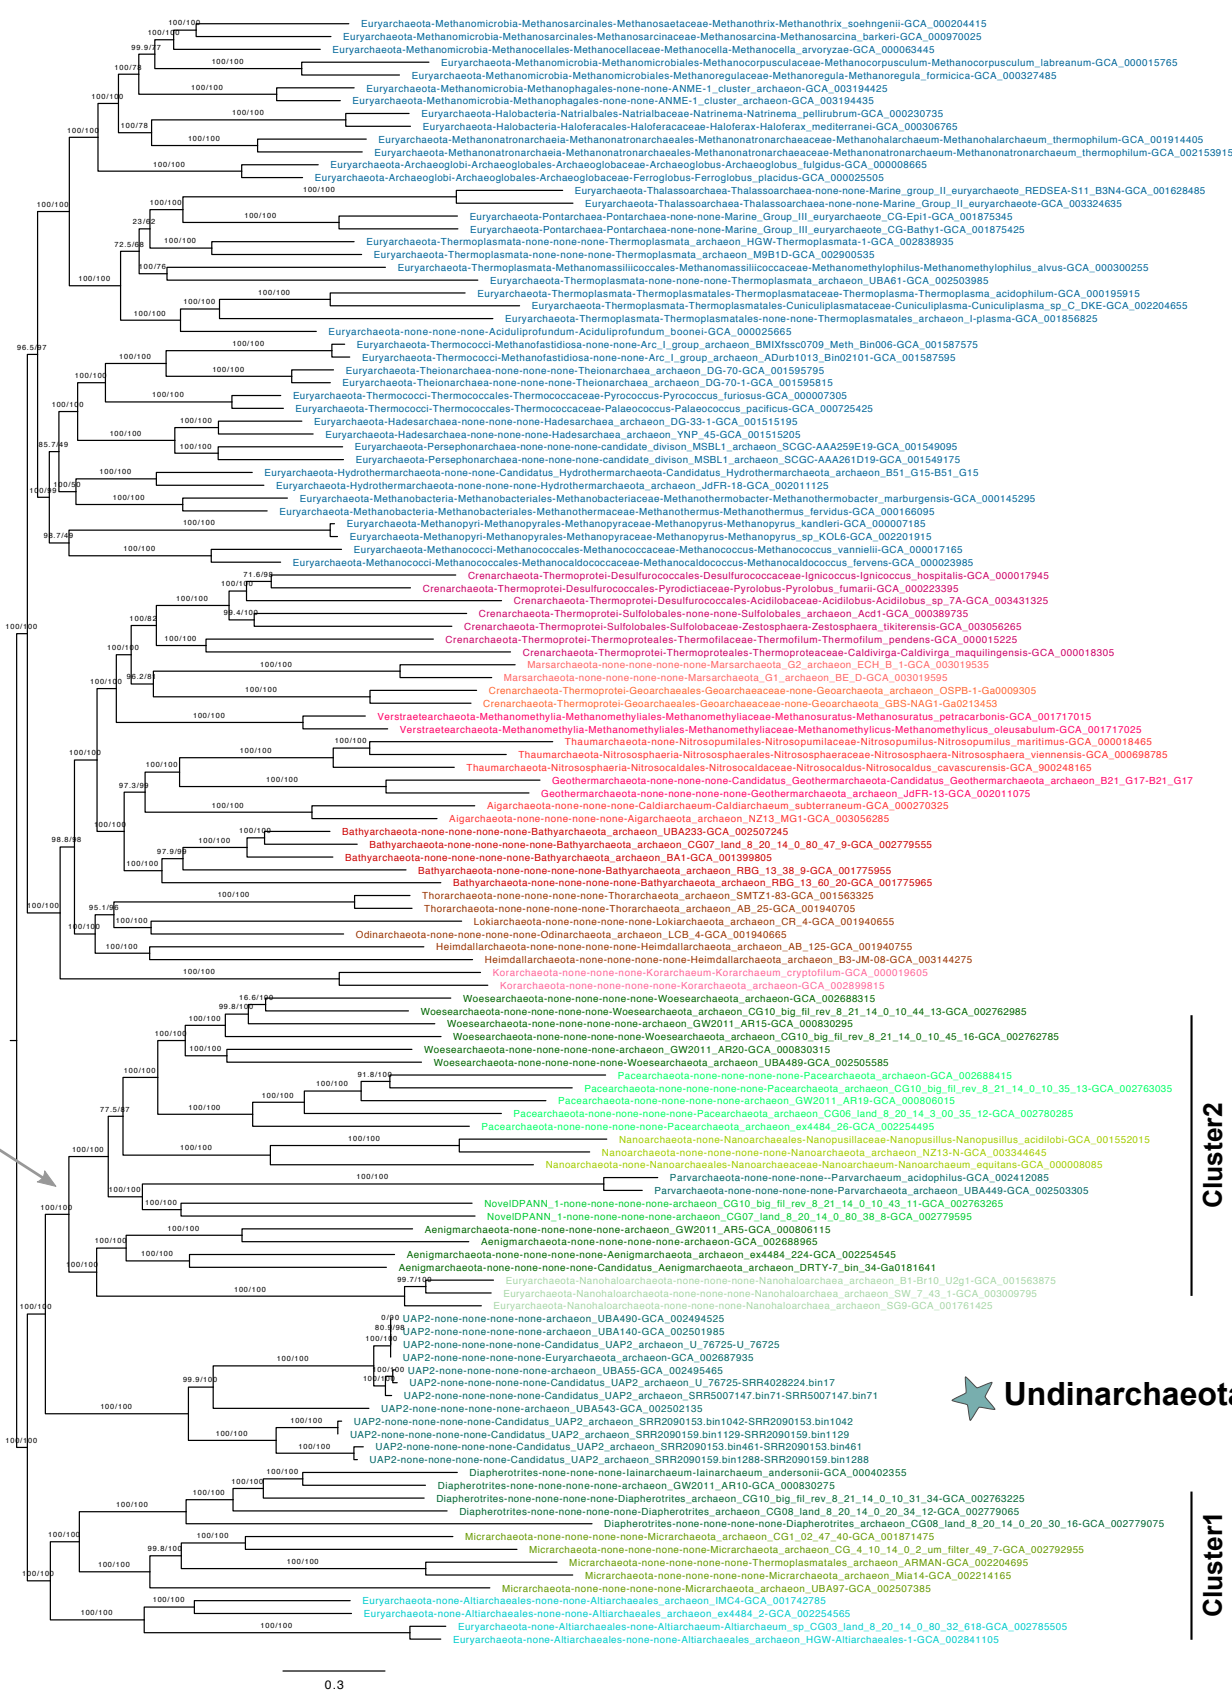

Euryarchaeota

TACK + Asgard

Cluster2

DPANN

Cluster1

**Supplementary Figure 45 | Phylogenetic placement of Undinarchaeota based on an alignment generated with the 75% top ranked proteins (n=85) and the 127 species set.** The alignment was trimmed with BMGE (alignment length = 18,824 aa). A ML phylogenetic tree was inferred with the LG+C60+F+R model with an ultrafast bootstrap approximation (left) and SH-like approximate likelihood tests (right), each run with 1000 replicates. The tree was artificially rooted with the DPANN archaea and the grey arrow shows the root position inferred with minimal ancestor deviation rooting (Tria et al., 2017). Scale bar: Average number of substitutions per site. Tree statistics for tree number 38 can be found in Supplementary Data 6.



127 species  
 75% top ranked proteins  
 (n=85)  
 trimmed alignment (BMGE-FAST)  
 39,615 amino acids  
 Iqtree, LG+C60+F+R

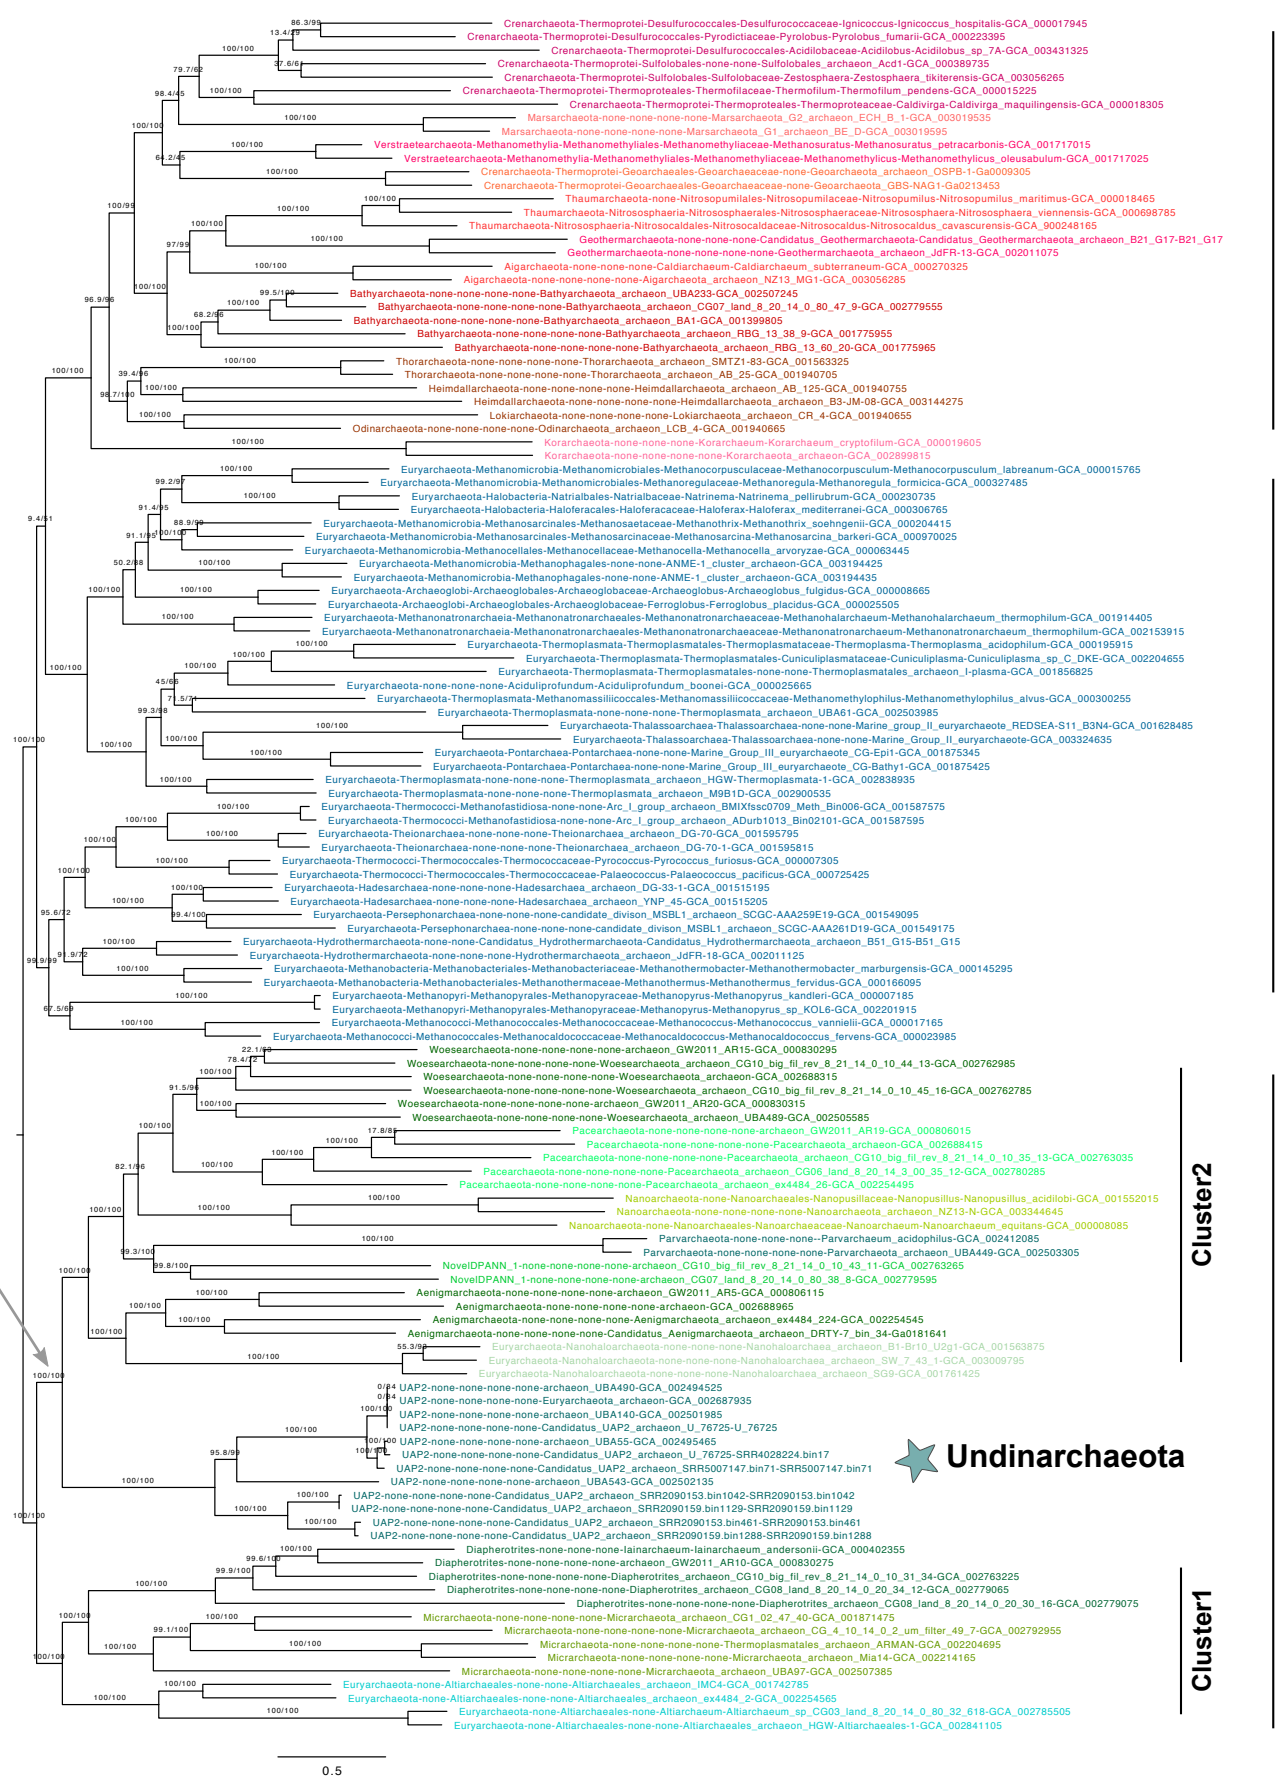

**Supplementary Figure 46 | Phylogenetic placement of Undinarchaeota based on an alignment generated with the 75% top ranked proteins (n=85) and the 127 species set.** The alignment was trimmed with BMGE-FAST (alignment length = 39,615 aa). A ML phylogenetic tree was inferred with the LG+C60 +F+R model with an ultrafast bootstrap approximation (left) and SH-like approximate likelihood tests (right), each run with 1000 replicates. The tree was artificially rooted with the DPANN archaea and the grey arrow shows the root position inferred with minimal ancestor deviation rooting. Scale bar: Average number of substitutions per site. Tree statistics for tree number 39 can be found in Supplementary Data 6.

127 species  
 75% top ranked proteins (n=85)  
 trimmed alignment (BMGE)  
 SR4 decoded  
 18,824 characters  
 Iqtree, LG+C60+F+R

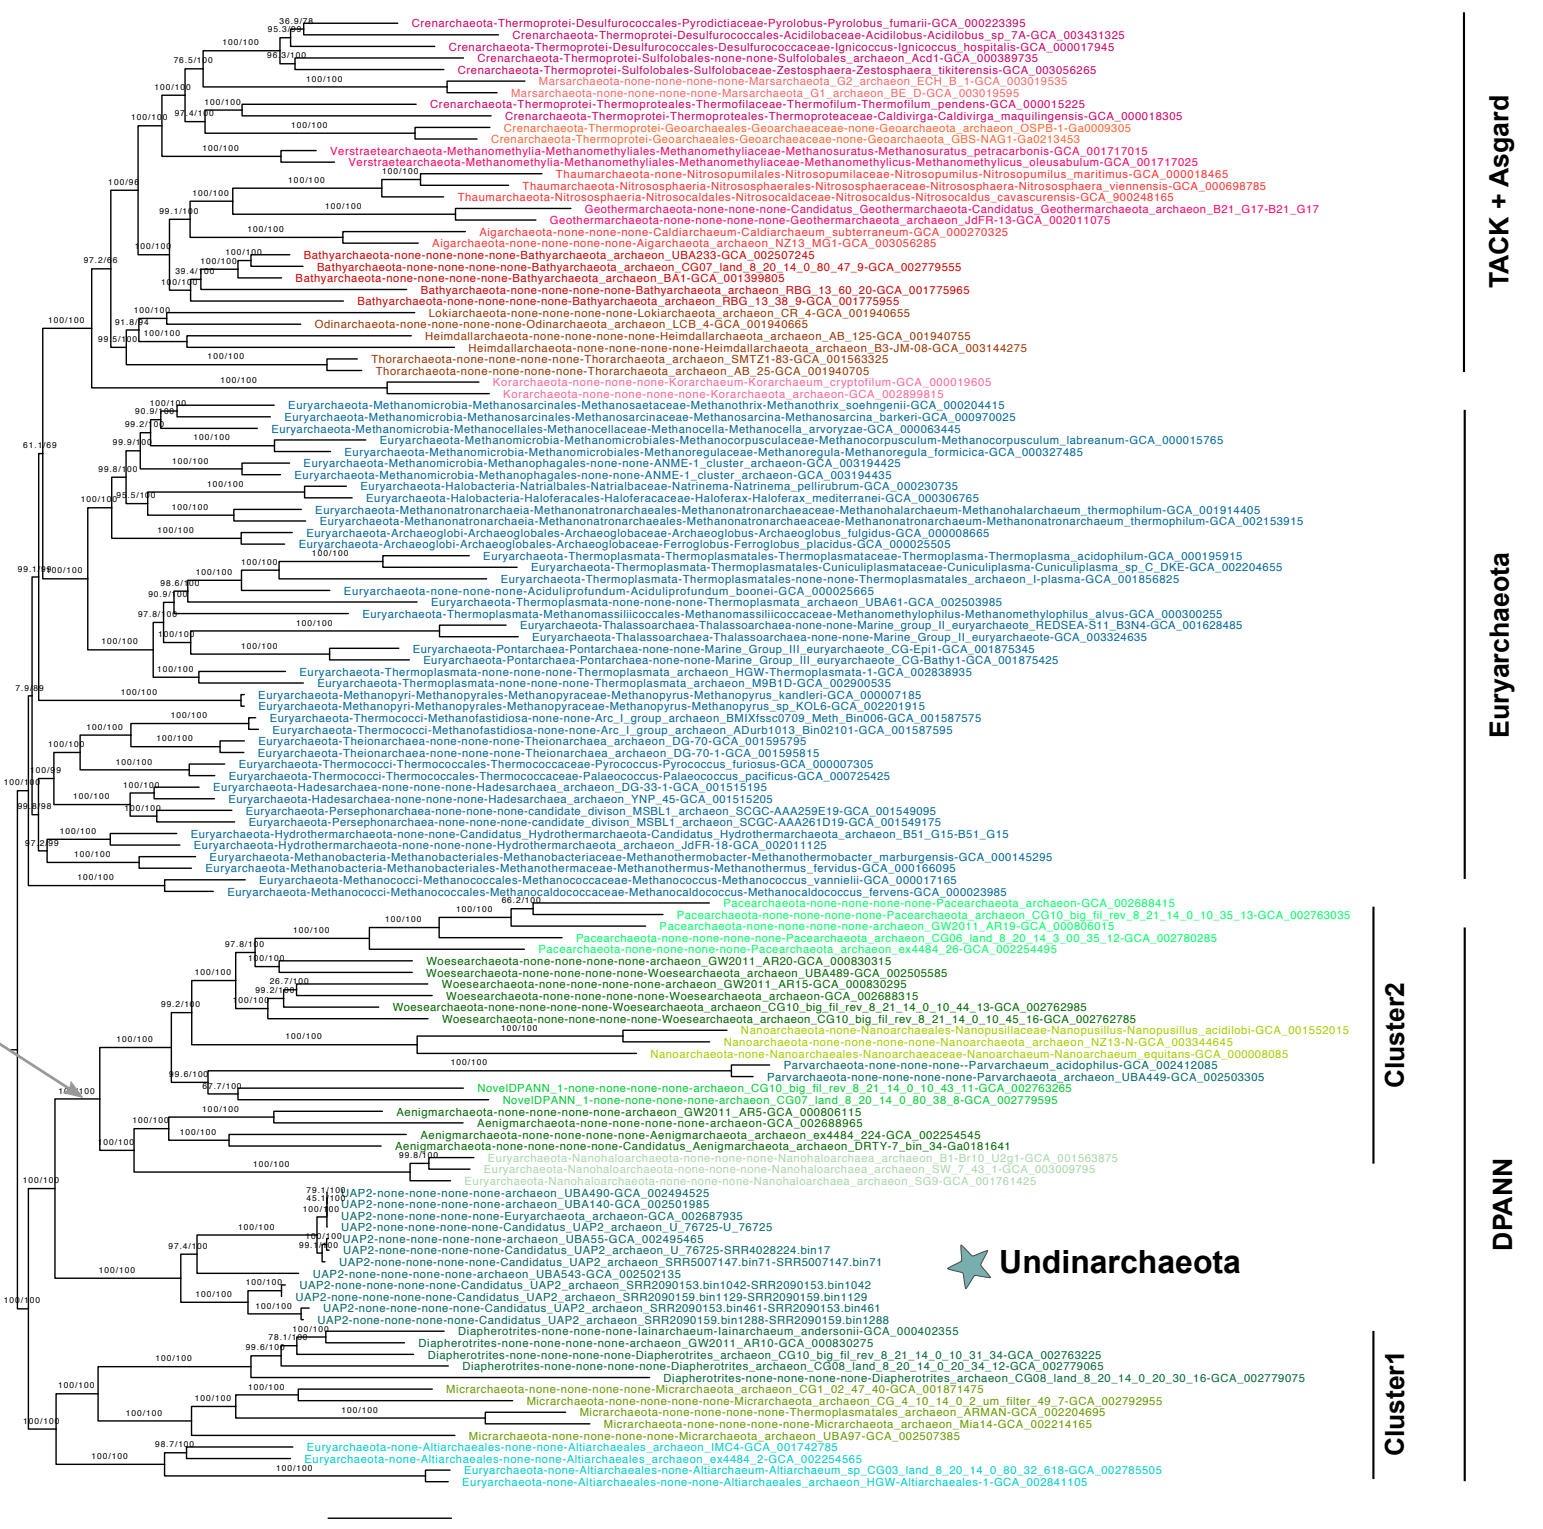

**Supplementary Figure 47 | Phylogenetic placement of Undinarchaeota based on an alignment generated with the 75% top ranked proteins (n=85) and the 127 species set.** The alignment was trimmed with BMGE and decoded into 4 character states (SR4 decoding; alignment length = 18,824 characters). A ML phylogenetic tree was inferred with the LG+C60+F+R model with an ultrafast bootstrap approximation (left) and SH-like approximate likelihood tests (right), each run with 1000 replicates. The tree was artificially rooted with the DPANN archaea and the grey arrow shows the root position inferred with minimal ancestor deviation rooting (Tria et al., 2017). Scale bar: Average number of substitutions per site. Tree statistics for tree number 40 can be found in Supplementary Data 6.

364 species  
 25% lowest ranked proteins (n=28)  
 trimmed alignment (BMGE)  
 3,963 amino acids  
 Iqtree, LG+C60+F+R

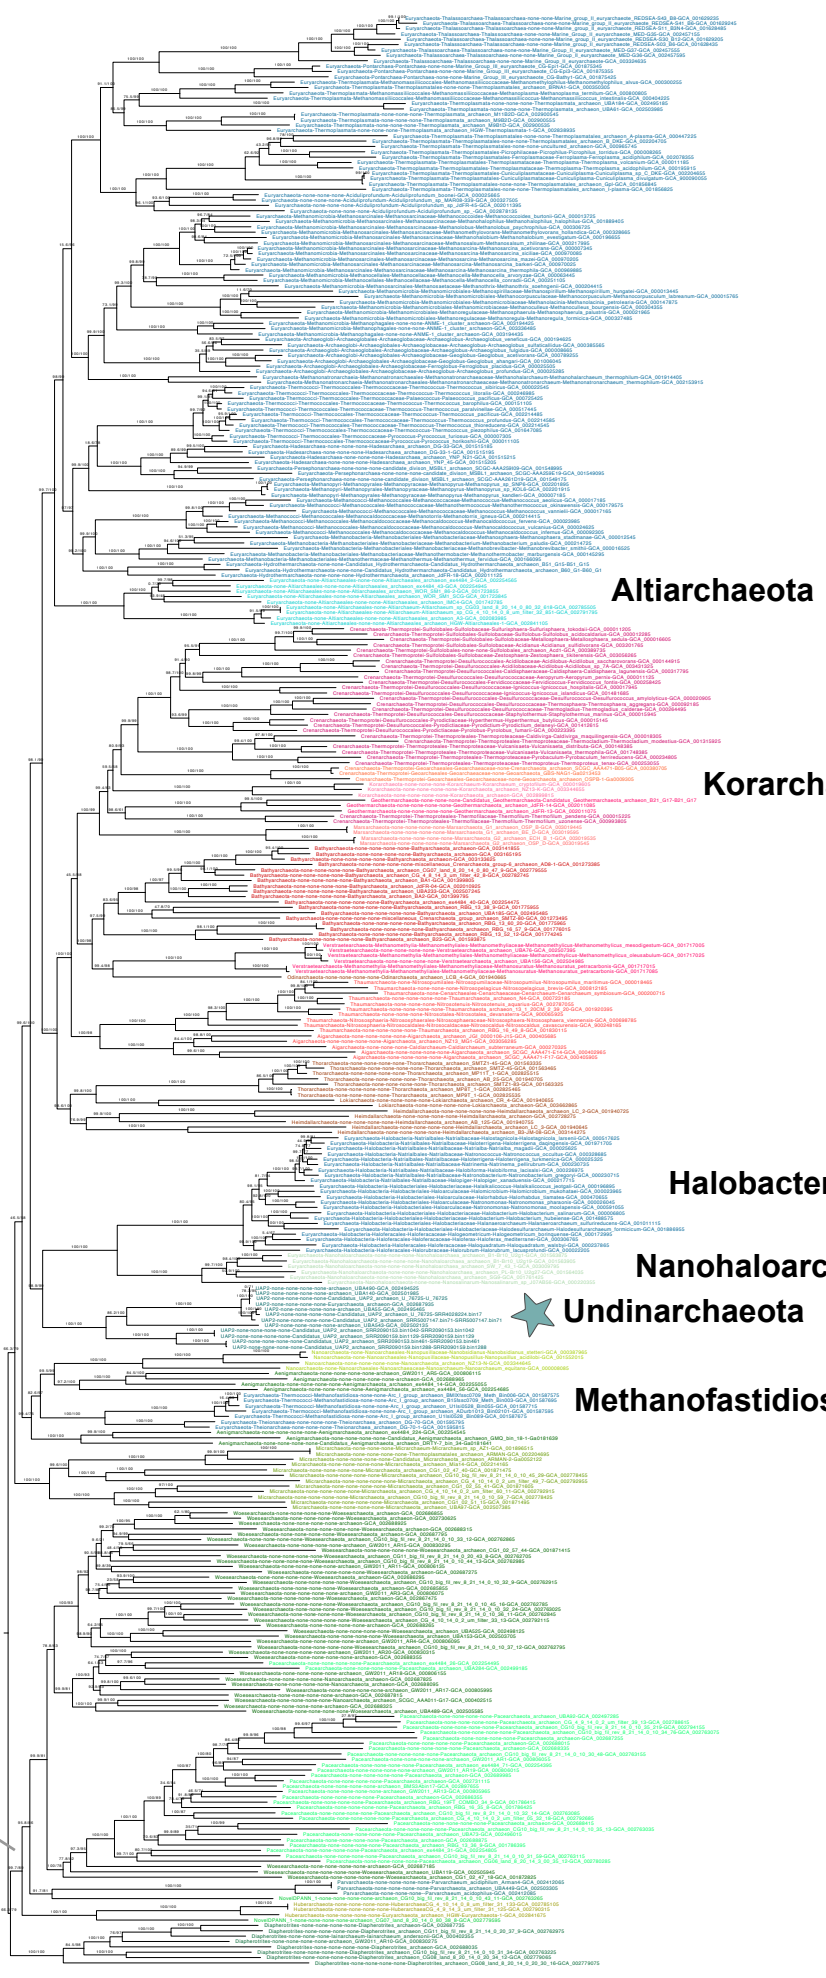

**Supplementary Figure 48 | Phylogenetic placement of Undinarchaeota based on an alignment generated with the 25% lowest ranking proteins (n=28) and the 364 species set.** The alignment was trimmed with BMGE (alignment length = 3,963 aa). A ML phylogenetic tree was inferred with the LG+C60+F+R model with an ultrafast bootstrap approximation (left) and SH-like approximate likelihood tests (right), each run with 1000 replicates. The tree was artificially rooted with the DPANN archaea and the grey arrow shows the root inferred with minimal ancestor deviation rooting (Tria et al., 2017). Scale bar: Average number of substitutions per site. Tree statistics for tree number 41 can be found in Supplementary Data 6.

127 species  
 25% lowest ranked proteins  
 (n=28)  
 trimmed alignment (BMGE)  
 3,682 amino acids  
 Iqtree, LG+C60+F+R

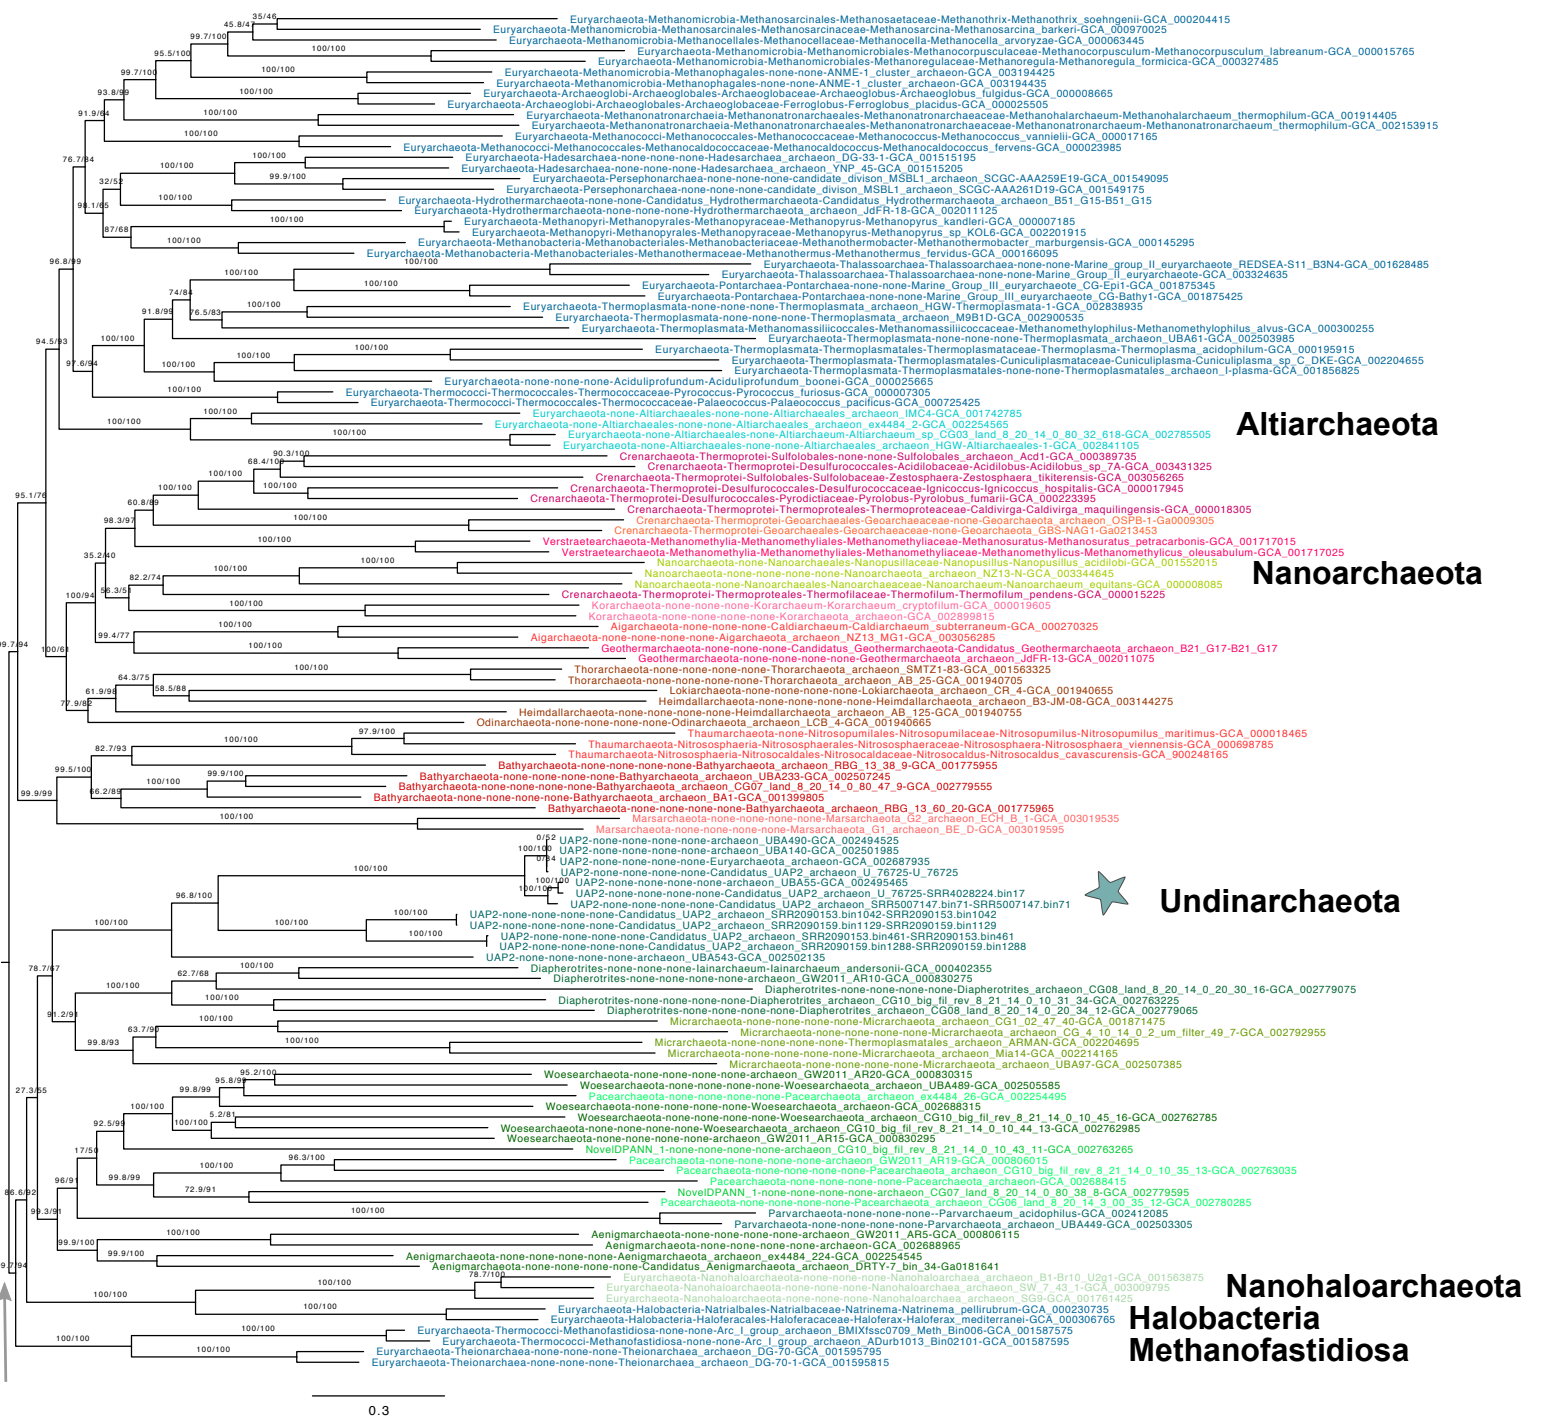

**Supplementary Figure 49 | Phylogenetic placement of Undinarchaeota based on an alignment generated with the 25% lowest ranked proteins (n=28) and the 127 species set.** The alignment was trimmed with BMGE (alignment length = 3,682 aa). A ML phylogenetic tree was inferred with the LG+C60+F+R model with an ultrafast bootstrap approximation (left) and SH-like approximate likelihood tests (right), each run with 1000 replicates. The tree was artificially rooted with the DPANN archaea and the grey arrow shows the root position inferred with minimal ancestor deviation rooting (Tria et al., 2017). Scale bar: Average number of substitutions per site. Tree statistics for tree number 42 can be found in Supplementary Data 6.



364 species  
 50% lowest ranked proteins (n=56)  
 trimmed alignment (BMGE)  
 8,305 amino acids  
 Iqtree, LG+C60+F+R

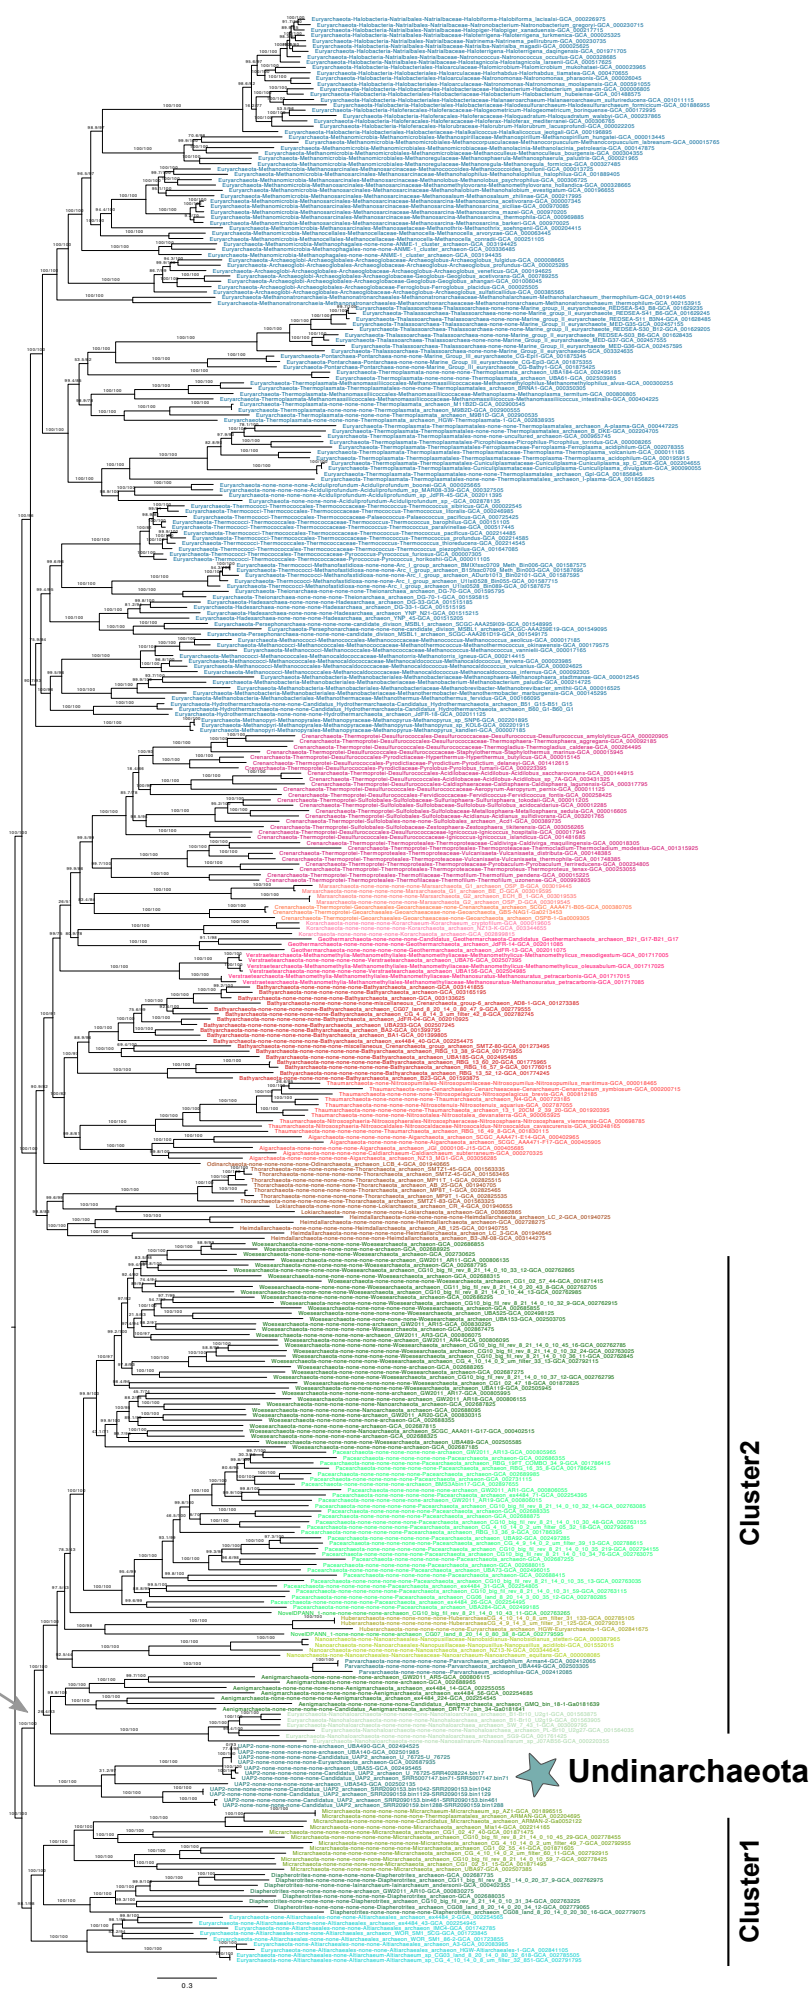

Euryarchaeota

TACK + Asgard

Cluster 2

DPANN

Cluster 1

★ Undinarchaeota

**Supplementary Figure 50 | Phylogenetic placement of Undinarchaeota based on an alignment generated with the 50% lowest ranked proteins (n=56) and the 364 species set.** The alignment was trimmed with BMGE (alignment length = 8,305 aa). A ML phylogenetic tree was inferred with the LG+C60+F+R model with an ultrafast bootstrap approximation (left) and SH-like approximate likelihood tests (right), each run with 1000 replicates. The tree was artificially rooted with the DPANN archaea and the grey arrow shows the root position inferred with minimal ancestor deviation rooting (Tria et al., 2017). Scale bar: Average number of substitutions per site. Tree statistics for tree number 43 can be found in Supplementary Data 6.



127 species  
 50% lowest ranked proteins (n=57)  
 trimmed alignment (BMGE)  
 9,133 amino acids  
 Iqtree, LG+C60+F+R

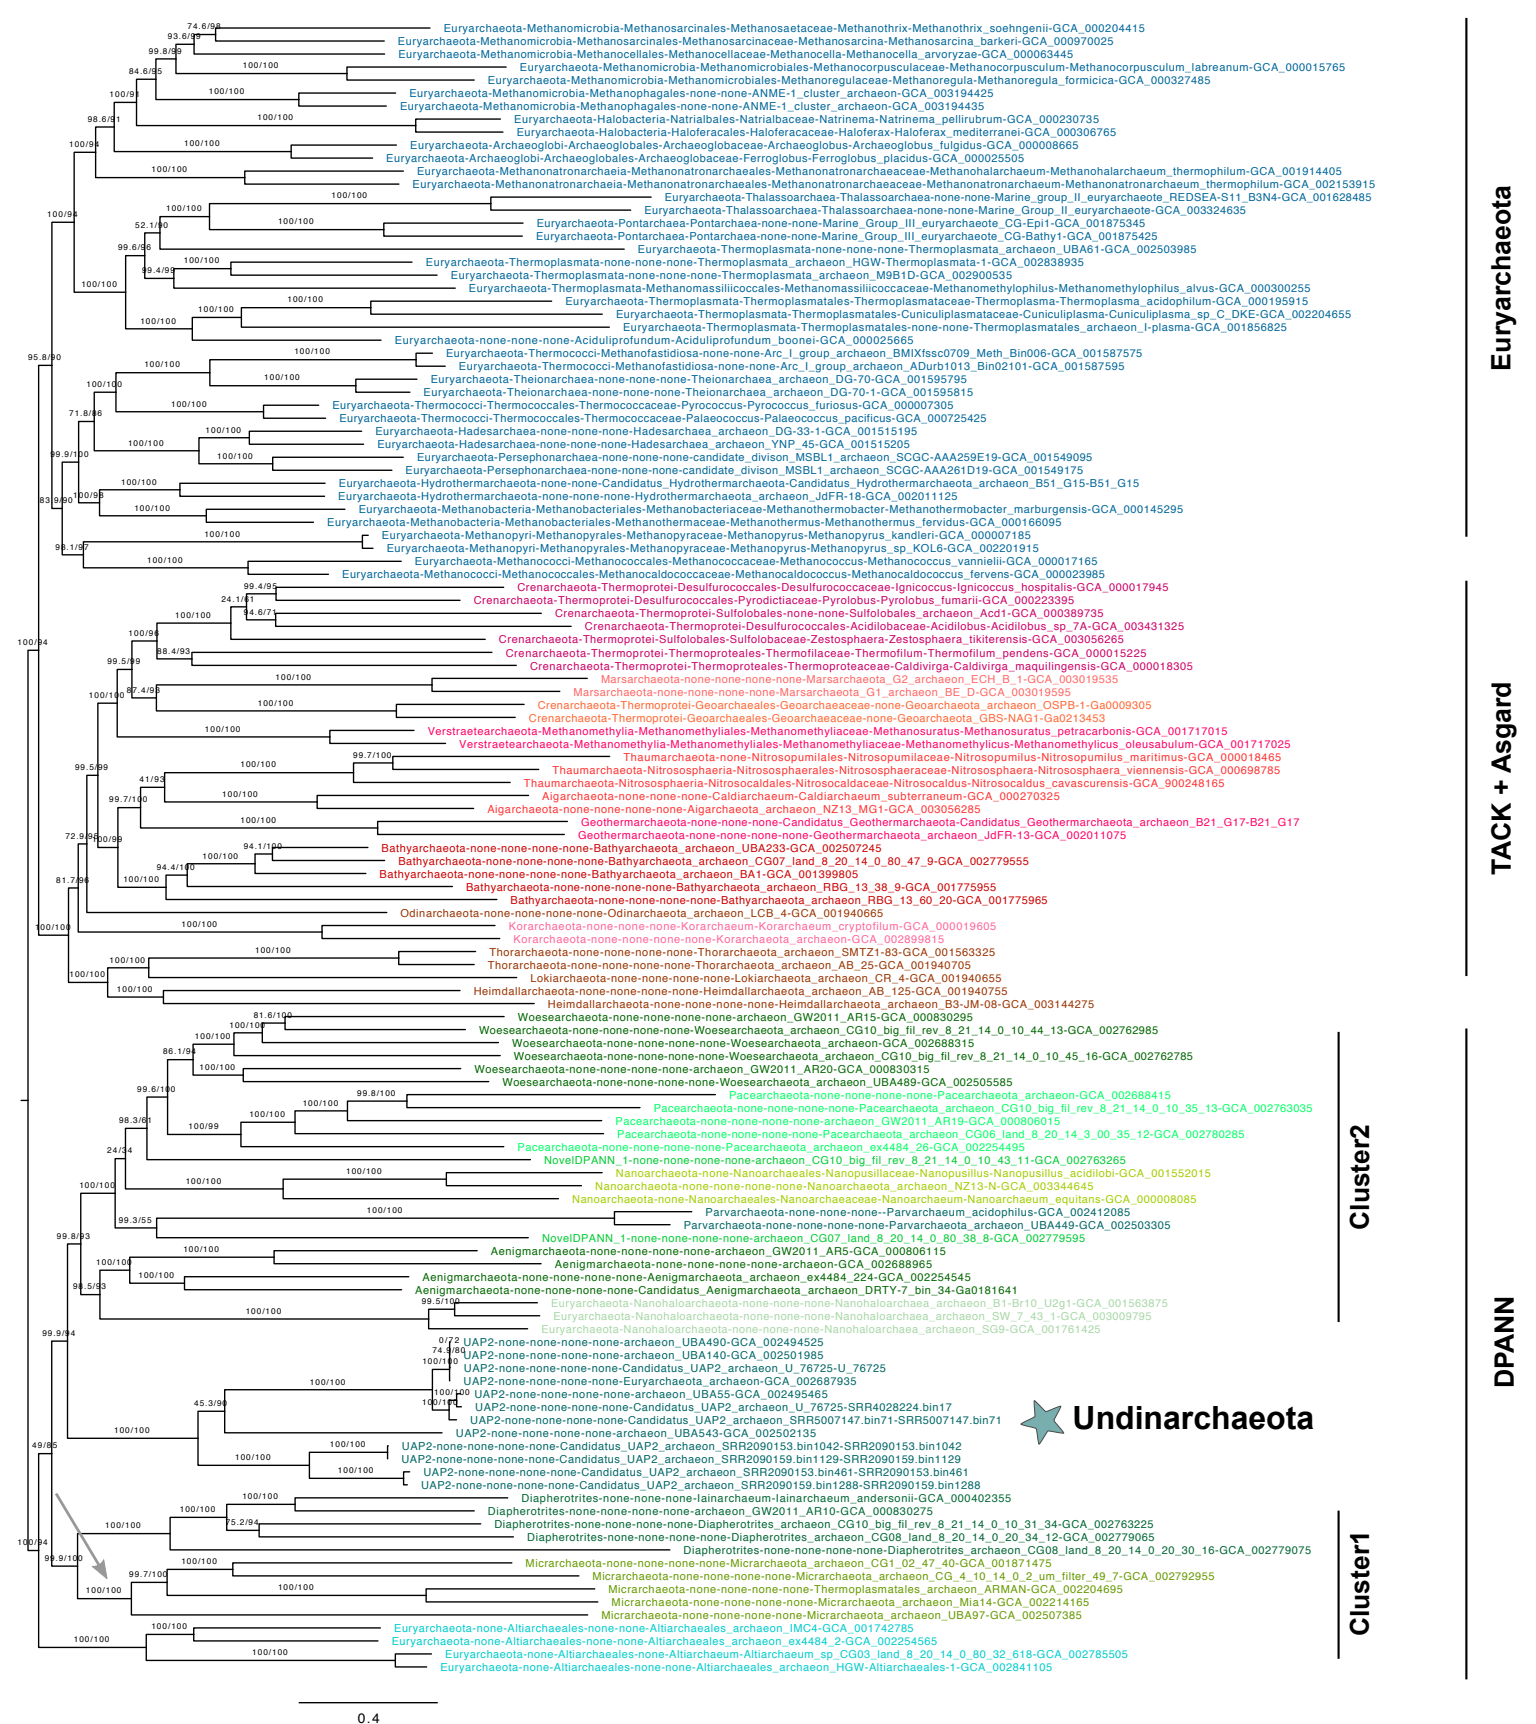

Supplementary Figure 51 | Phylogenetic placement of Undinarcheota based on an alignment generated with the 50% lowest ranked proteins (n=57) and the 127 species set. The alignment was trimmed with BMGE (alignment length = 9,133 aa). A ML phylogenetic tree was inferred with the LG+C60+F+R model with an ultrafast bootstrap approximation (left) and SH-like approximate likelihood tests (right), each run with 1000 replicates. The tree was artificially rooted with the DPANN archaea and the grey arrow shows the root inferred with minimal ancestor deviation rooting (Tria et al., 2017). Scale bar: Average number of substitutions per site. Tree statistics for tree number 44 can be found in Supplementary Data 6.

356 species

Phylosift marker proteins (n=34)

trimmed alignment (BMGE)

5,353 amino acids

Iqtree, LG+C60+F+R

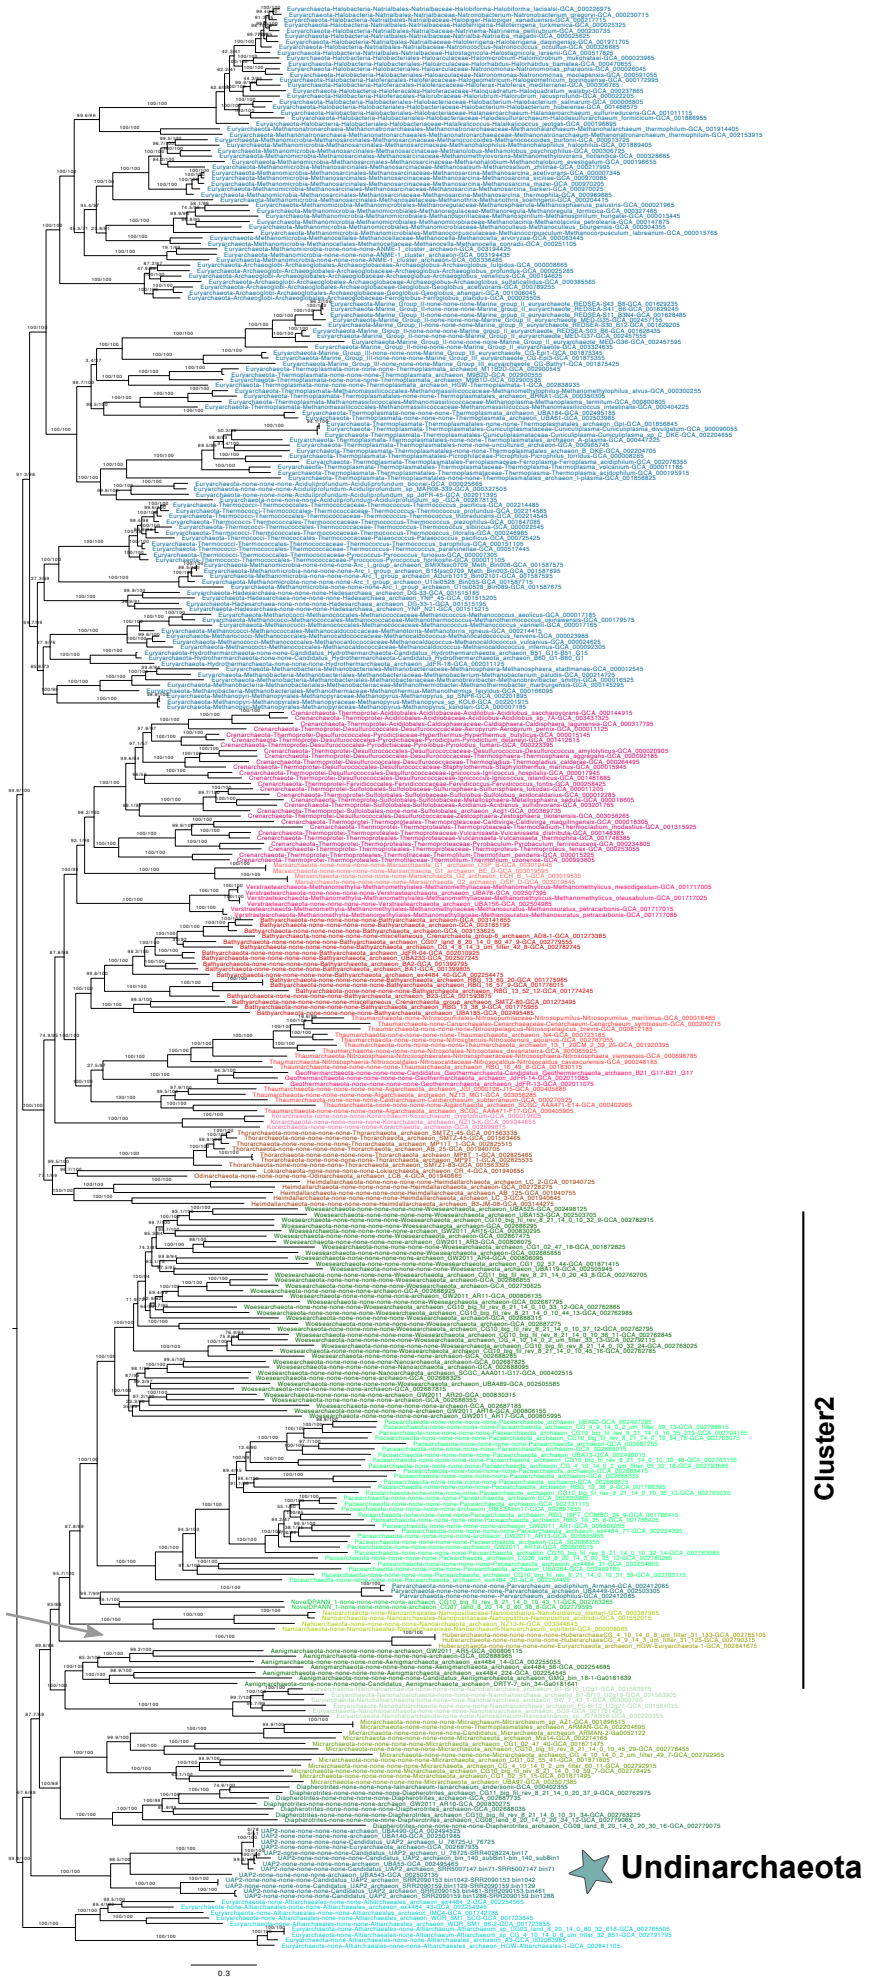

Euryarchaeota

TACK + Asgard

Cluster2

DPANN

★ Undinarchaeota

**Supplementary Figure 52 | Phylogenetic placement of Undinarchaeota based on an alignment generated with the phylosift marker proteins (n=34) and the 356 species set.** The alignment was trimmed with BMGE (alignment length = 5,353 aa). A ML phylogenetic tree was inferred with the LG+C60+F+R model with an ultrafast bootstrap approximation (left) and SH-like approximate likelihood tests (right), each run with 1000 replicates. The tree was artificially rooted with the DPANN archaea and the grey arrow shows the root position inferred with minimal ancestor deviation rooting (Tria et al., 2017). Scale bar: Average number of substitutions per site. Tree statistics for tree number 45 can be found in Supplementary Data 6.

356 species  
 GTDB marker proteins  
 (n=122)  
 trimmed alignment (BMGE)  
 26,843 amino acids  
 Iqtree, LG+C60+F+R

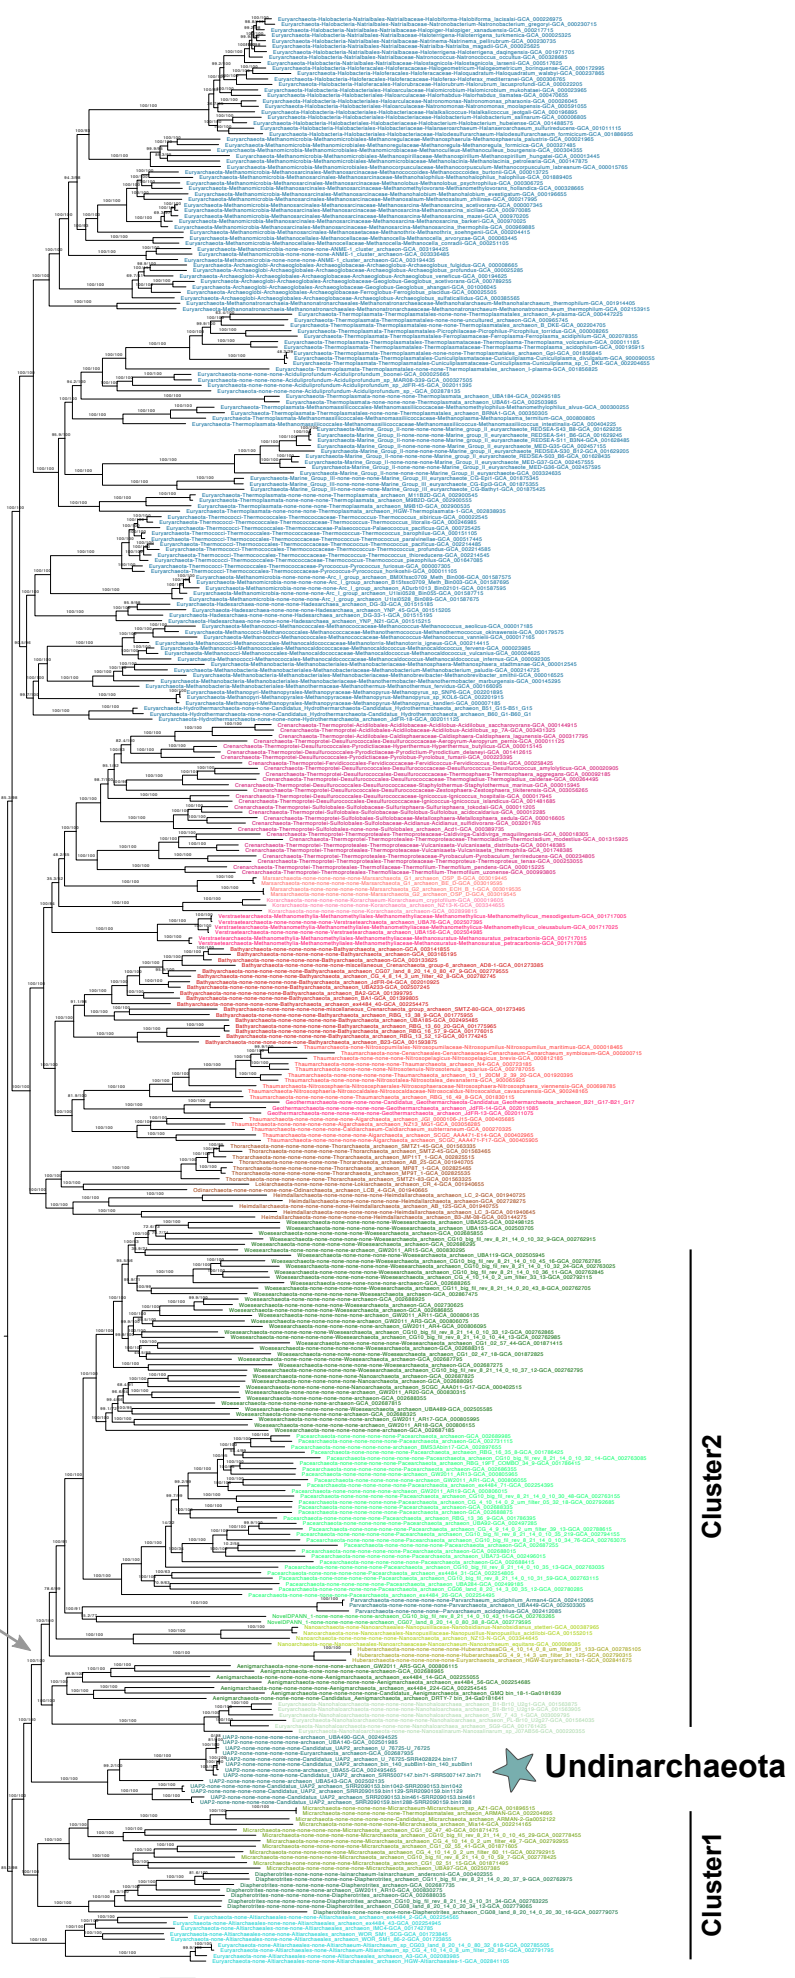

Euryarchaeota

TACK + Asgard

Cluster2

DPANN

Cluster1

★ Undinarchaeota

**Supplementary Figure 53 | Phylogenetic placement of Undinarchaeota based on an alignment generated with the GTDB archaeal marker proteins (n=122) and the 356 species set.** The alignment was trimmed with BMGE (alignment length = 26,843 aa). A ML phylogenetic tree was inferred with the LG +C60+F+R model using iqtree with an ultrafast bootstrap approximation (left) and SH-like approximate likelihood tests (right), each run with 1000 replicates. The tree was artificially rooted with the DPANN archaea and the grey arrow shows the root position inferred with minimal ancestor deviation rooting (Tria et al., 2017). Scale bar: Average number of substitutions per site. Tree statistics for tree number 46 can be found in Supplementary Data 6.

356 species  
 GTDB marker proteins  
 (n=122)  
 trimmed alignment (BMGE)  
 26,843 amino acids  
 Fasttree, LG+C60+F+R

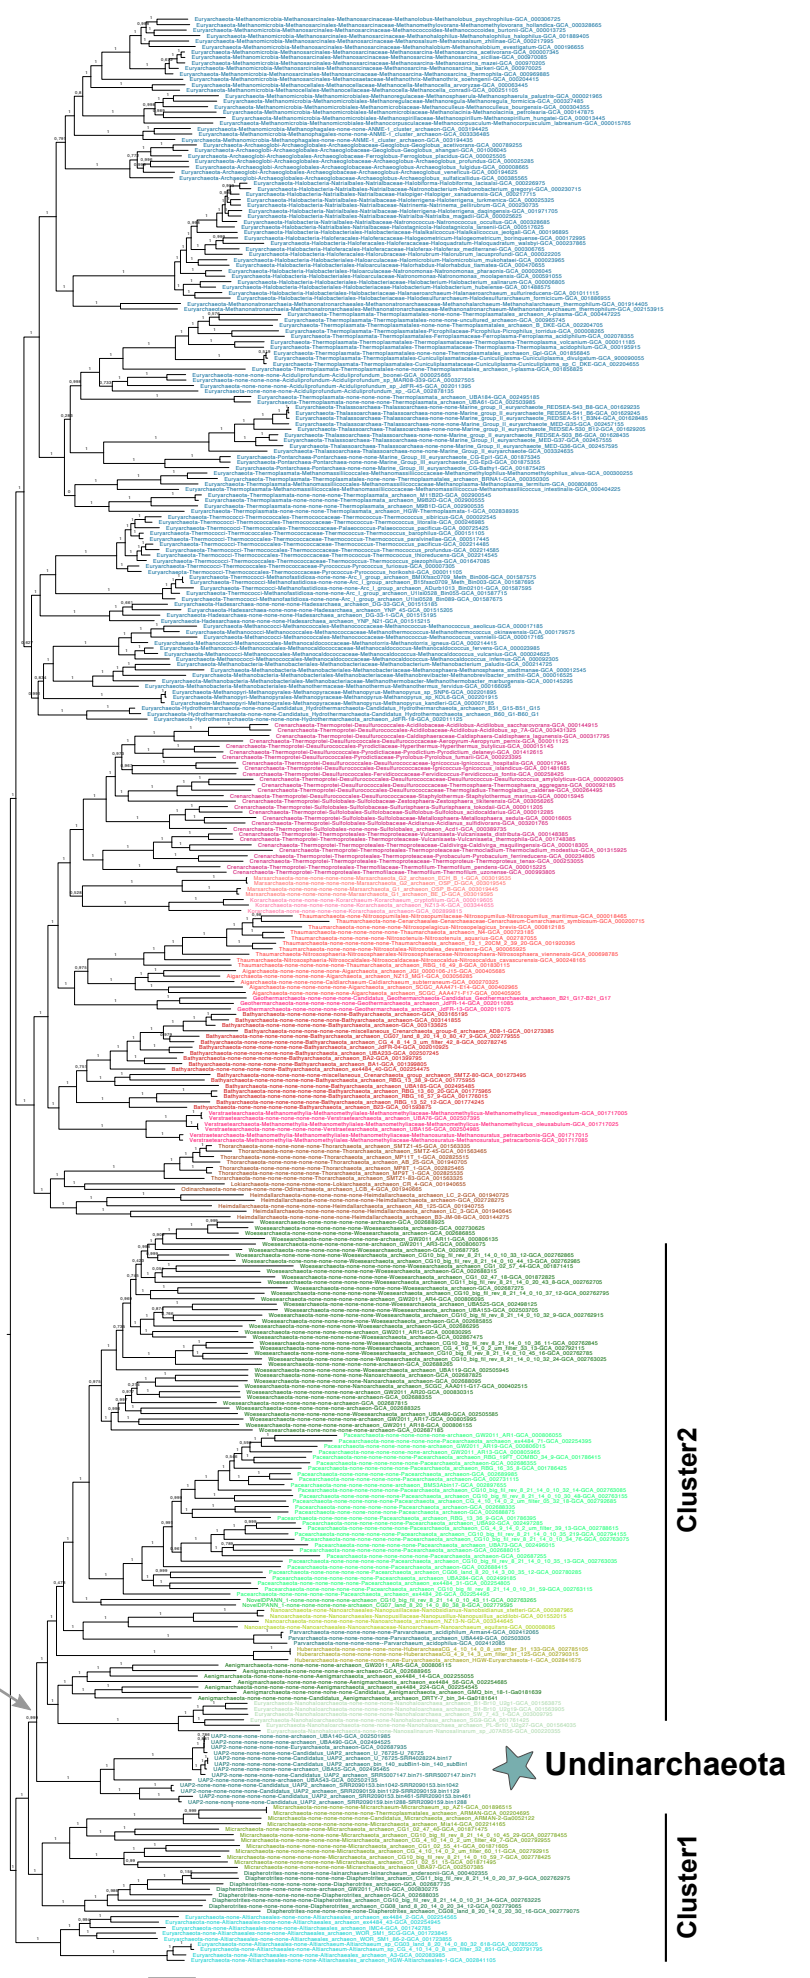

Euryarchaeota

TACK + Asgard

Cluster2

DPANN

Cluster1

★ Undinarchaeota

**Supplementary Figure 54 | Phylogenetic placement of Undinarchaeota based on an alignment generated with the archaeal GTDB marker proteins (n=122) and the 356 species set.** The alignment was trimmed using BMGE (alignment length = 26,843 aa). An approximately-ML phylogenetic tree was inferred with the WAG+GAMMA model using fasttree with SH-like approximate likelihood tests run with 1000 replicates. The tree was artificially rooted with the DPANN archaea and the grey arrow shows the root inferred with minimal ancestor deviation rooting (Tria et al., 2017). Scale bar: Average number of substitutions per site. Tree statistics for tree number 47 can be found in Supplementary Data 6.



356 species  
 Ribosomal proteins  
 (n=14)  
 trimmed alignment (BMGE)  
 1,974 amino acids  
 Iqtree, LG+C60+F+R

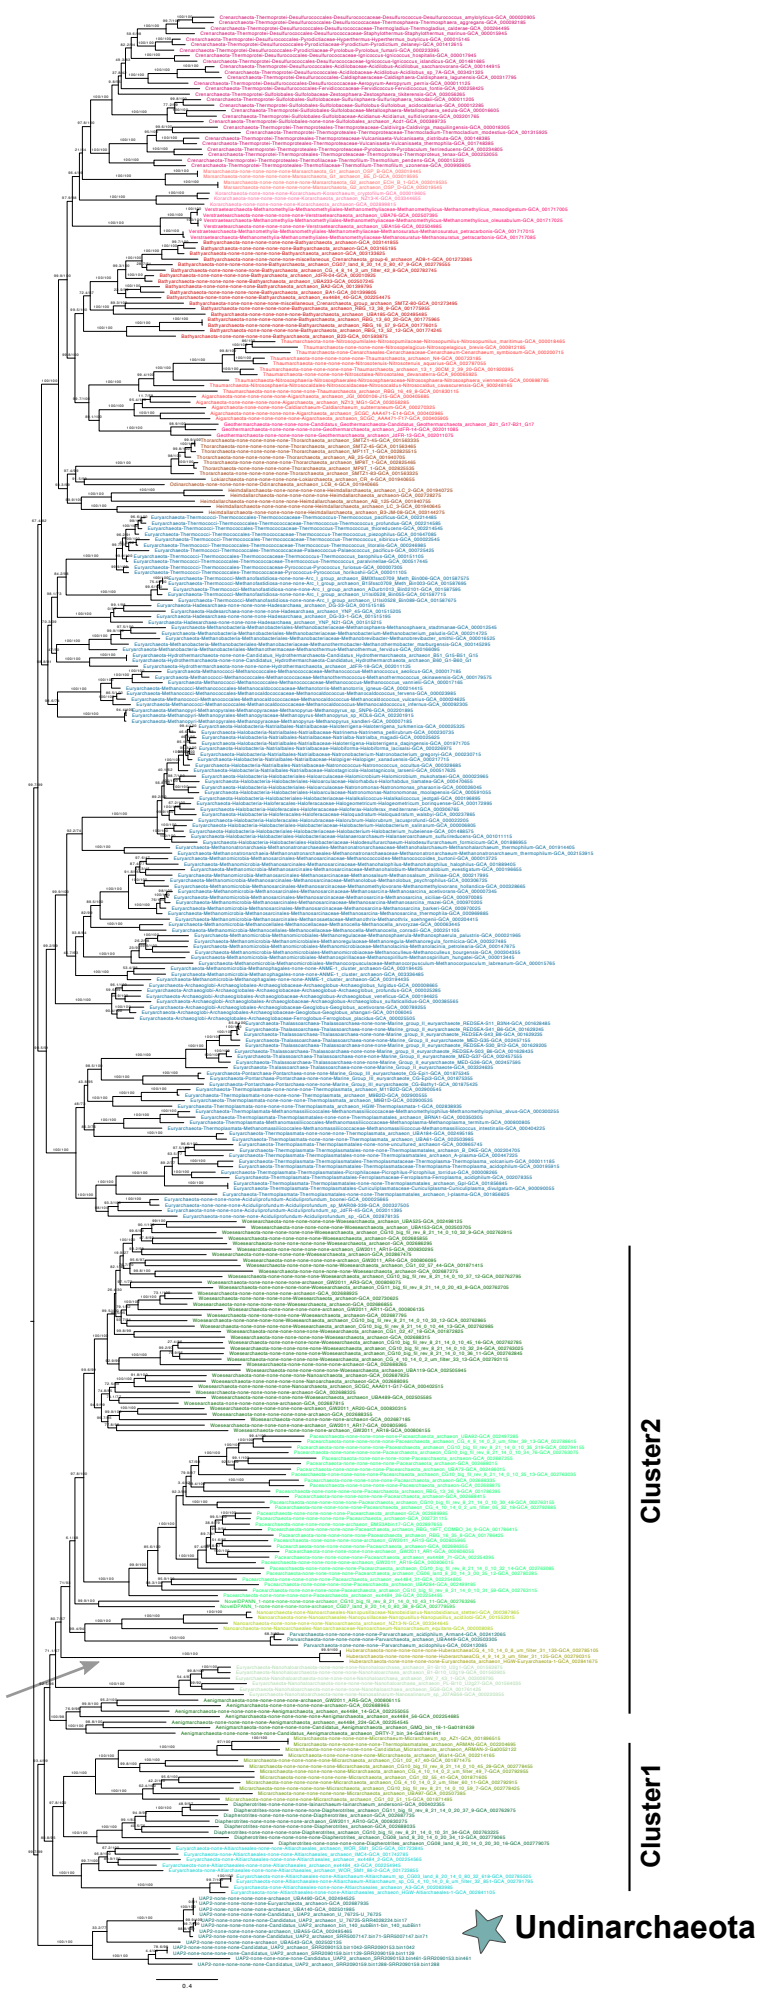

TACK + Asgard

Euryarchaeota

Cluster2

DPANN

Cluster1

★ Undinarchaeota

**Supplementary Figure 55 | Phylogenetic placement of Undinarchaeota based on an alignment generated with the 14 ribosomal proteins and the 356 species set.** The alignment was trimmed with BMGE (alignment length = 1,974 aa). A ML phylogenetic tree was inferred with the LG+C60+F+R model with an ultrafast bootstrap approximation (left) and SH-like approximate likelihood tests (right), each run with 1000 replicates. The tree was artificially rooted with the DPANN archaea and the grey arrow shows the root position inferred with minimal ancestor deviation rooting (Tria et al., 2017). Scale bar: Average number of substitutions per site. Tree statistics for tree number 48 can be found in Supplementary Data 6.



356 species  
 ribosomal proteins  
 (n=14)  
 trimmed alignment (TRIMAL)  
 2,406 amino acid  
 Iqtree, LG+C60+F+R

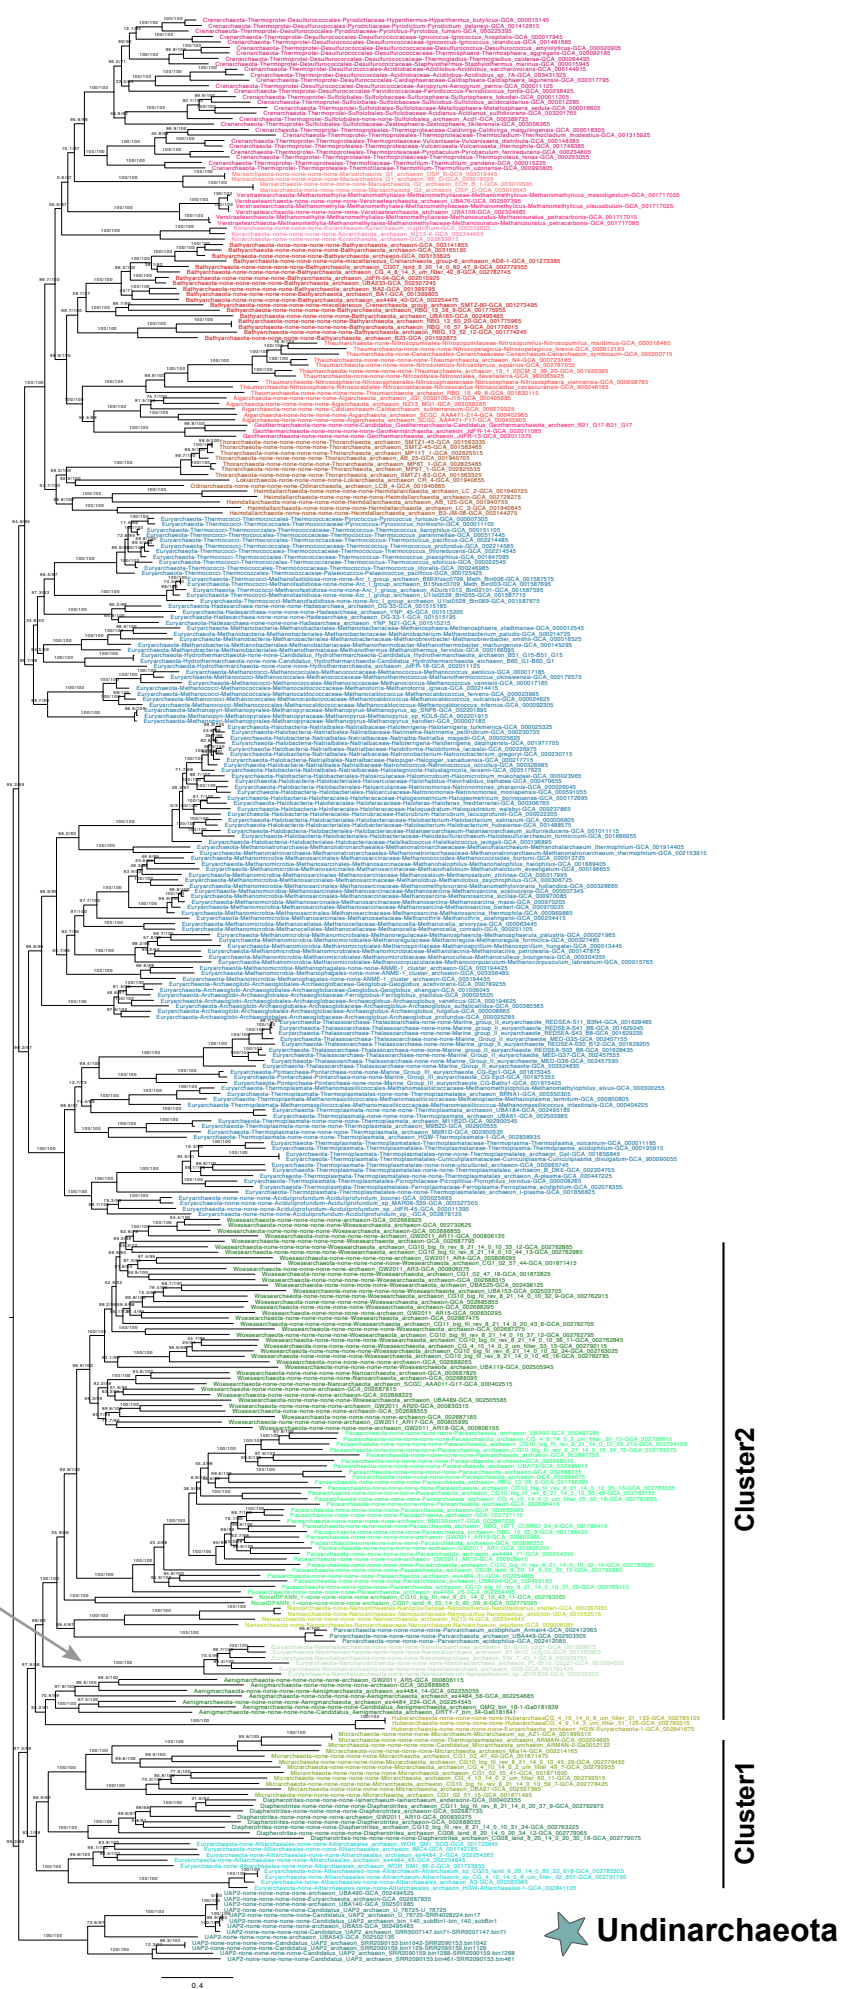

TACK + Asgard

Euryarchaeota

Cluster2

DPANN

Cluster1

★ Undinarchaeota

**Supplementary Figure 56 | Phylogenetic placement Undinarchaeota lineage based on an alignment generated with 14 ribosomal proteins and the 356 species set.** The alignment was trimmed with TRIMAL (alignment length = 2,406 aa). A ML phylogenetic tree was inferred with the LG+C60+F+R model with an ultrafast bootstrap approximation (left) and SH-like approximate likelihood tests (right), each run with 1000 replicates. The tree was artificially rooted with the DPANN archaea and the grey arrow shows the root position inferred with minimal ancestor deviation rooting (Tria et al., 2017). Scale bar: Average number of substitutions per site. Tree statistics for tree number 49 can be found in Supplementary Data 6.

364 species  
 48 marker proteins  
 trimmed alignment (BMGE)  
 9,534 amino acids  
 Iqtree, LG+C60+F+R

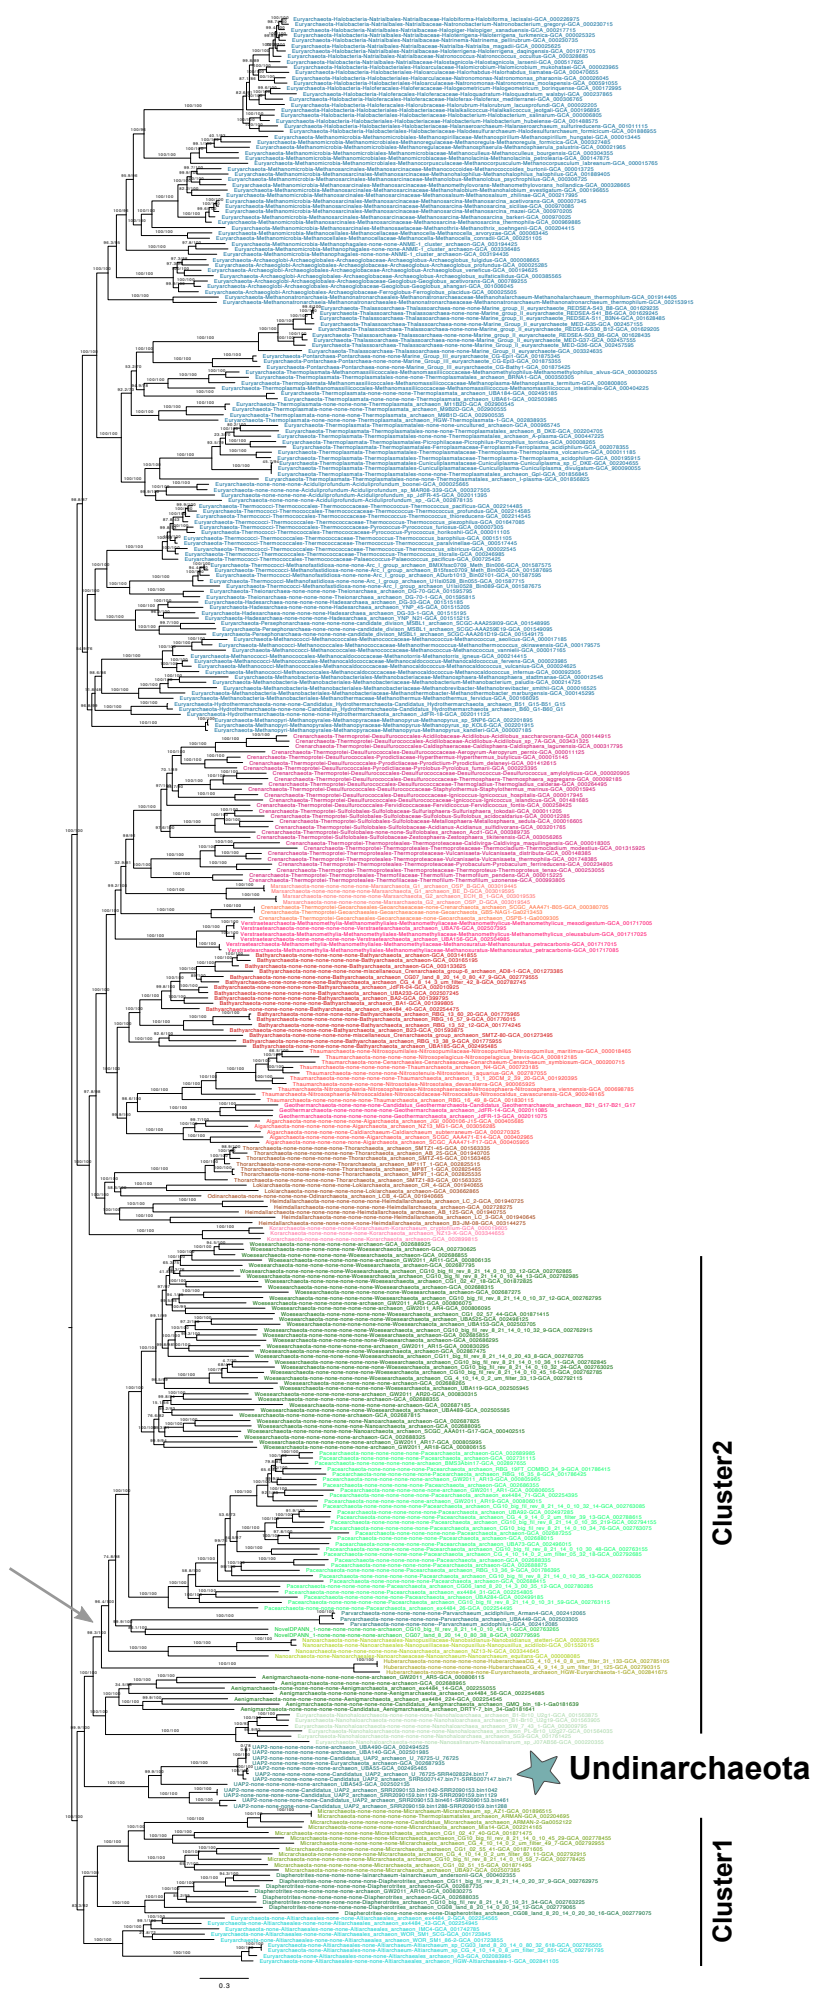

Euryarchaeota

TACK + Asgard

Cluster2

DPANN

Cluster1

★ Undinarchaeota

**Supplementary Figure 57 | Phylogenetic placement of Undinarchaeota based on an alignment generated with 48 universal marker proteins and the 364 species set.** The alignment was trimmed with BMGE (alignment length = 9,534 aa). A ML phylogenetic tree was inferred with the LG+C60+F+R model with an ultrafast bootstrap approximation (left) and SH-like approximate likelihood tests (right), each run with 1000 replicates. The tree was artificially rooted with the DPANN archaea and the grey arrow shows the root position inferred with minimal ancestor rooting (Tria et al., 2017). Scale bar: Average number of substitutions per site. Tree statistics for tree number 50 can be found in Supplementary Data 6.

215 species  
 48 marker proteins  
 trimmed alignment (BMGE)  
 8677 amino acids  
 Iqtree, LG+C60+F+R

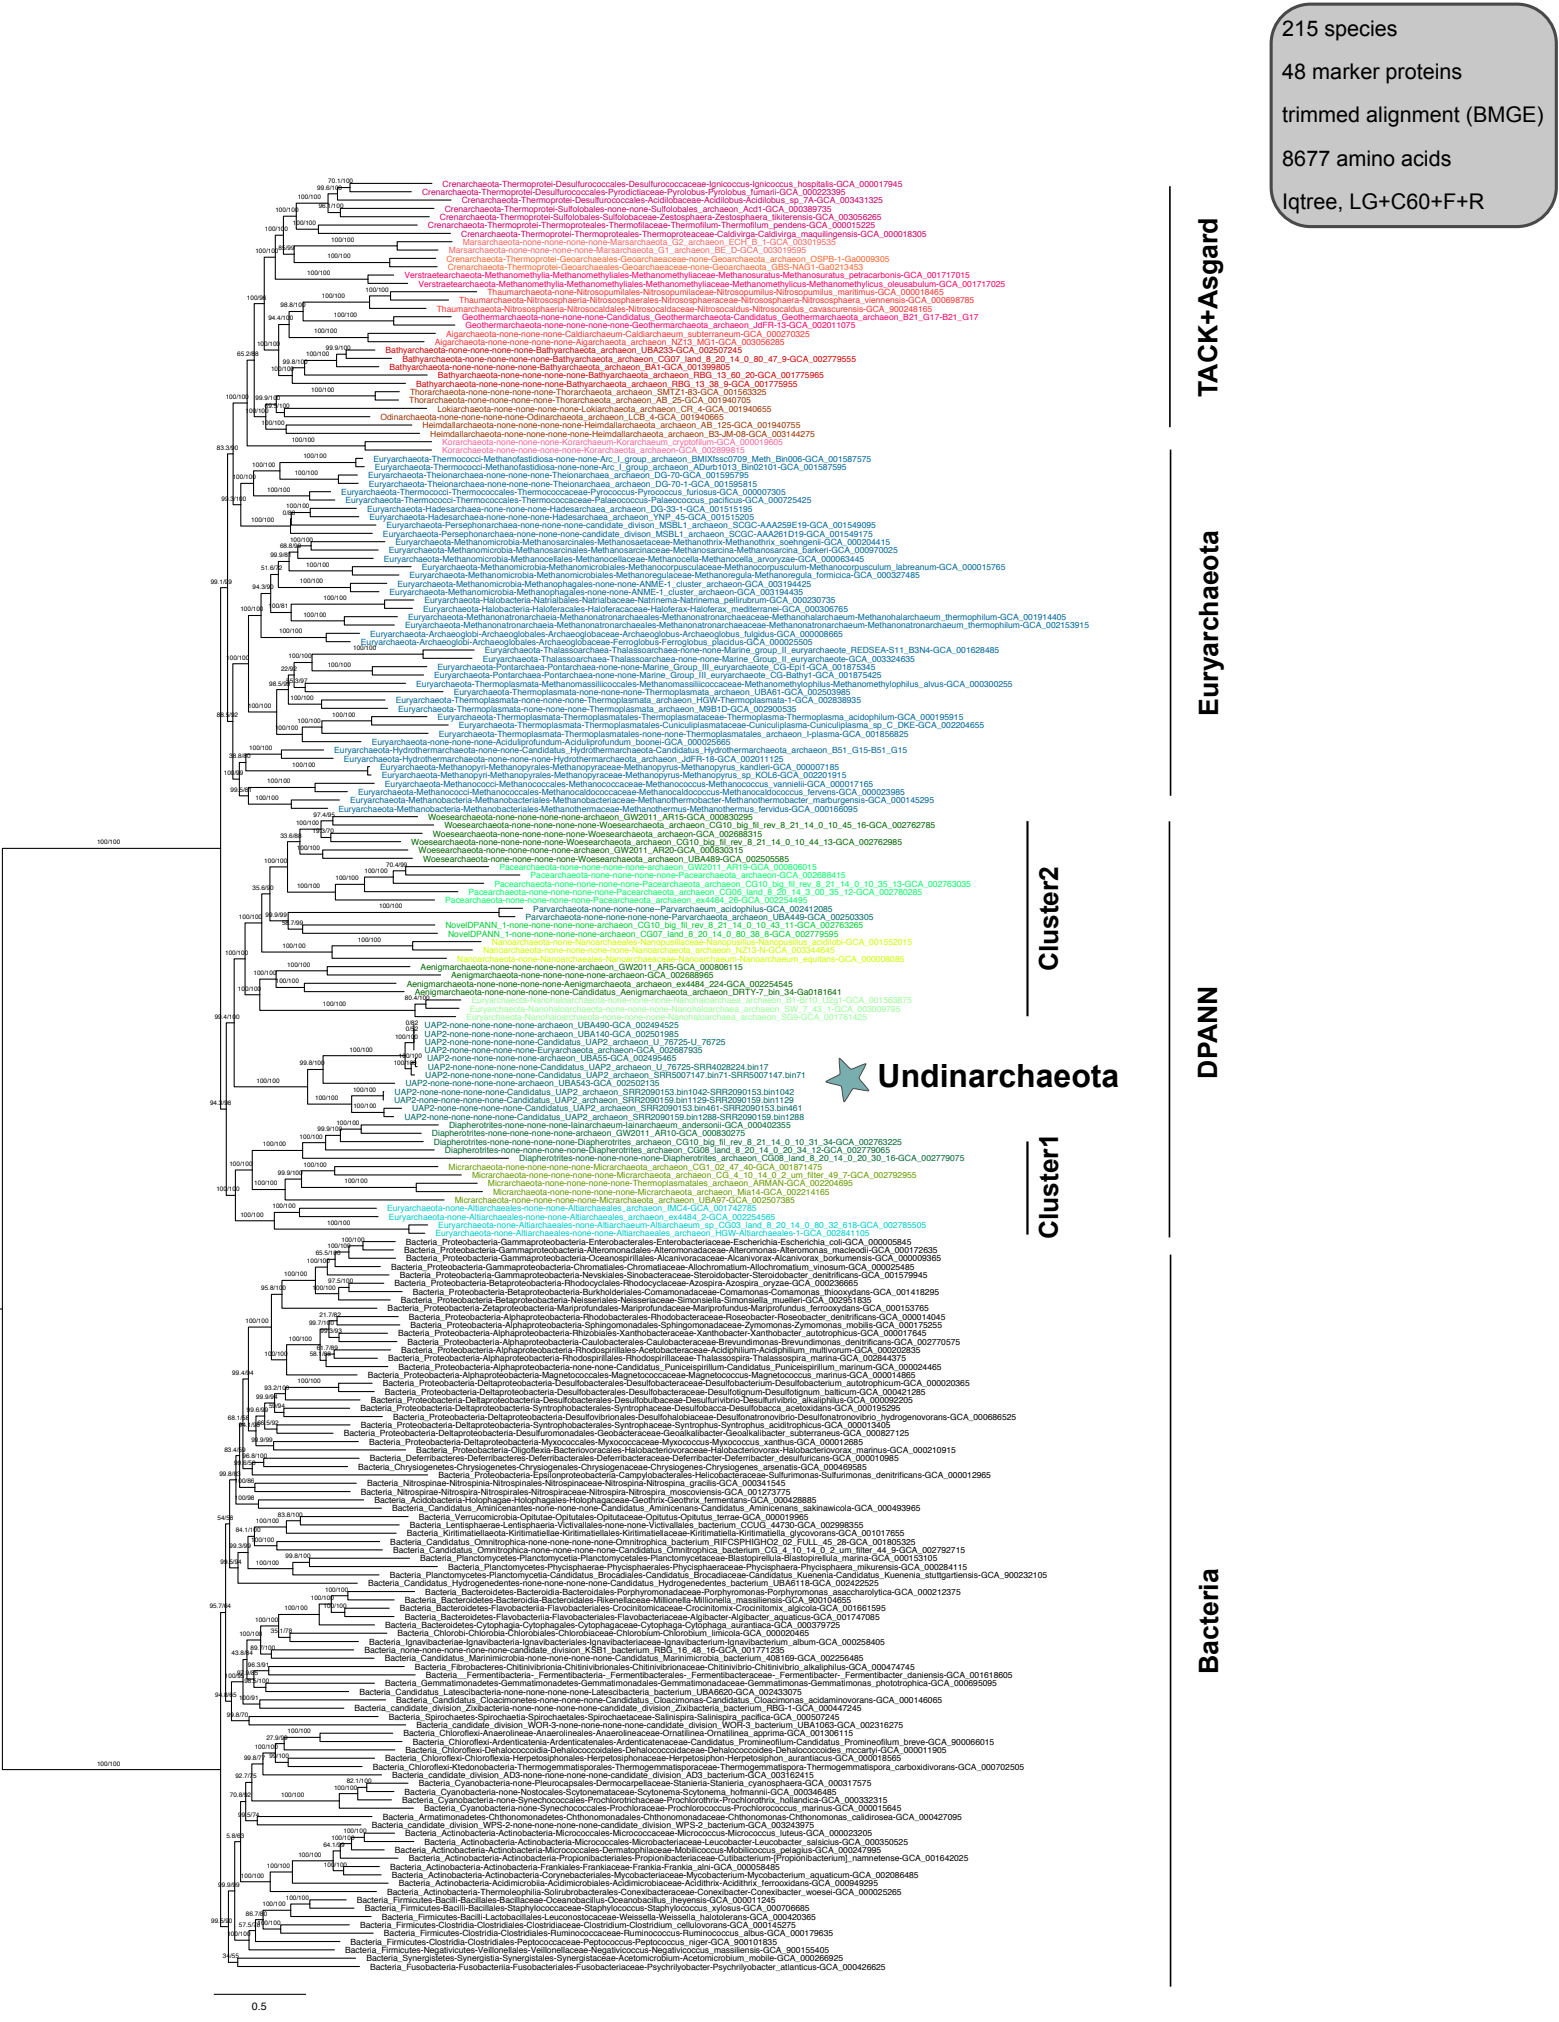

**Supplementary Figure 58 | Phylogenetic placement of Urdinarchaeota based on an alignment generated with 48 universal marker proteins and the 127 archaeal + 88 bacterial species set.** The alignment was trimmed with BMGE (alignment length = 8,677 aa). A ML phylogenetic tree was inferred with the LG +C60+F+R model with an ultrafast bootstrap approximation (left) and SH-like approximate likelihood tests (right), each run with 1000 replicates. The tree was rooted using bacteria (black labels) as outgroup. Scale bar: Average number of substitutions per site. Tree statistics for tree number 51 can be found in Supplementary Data 6.

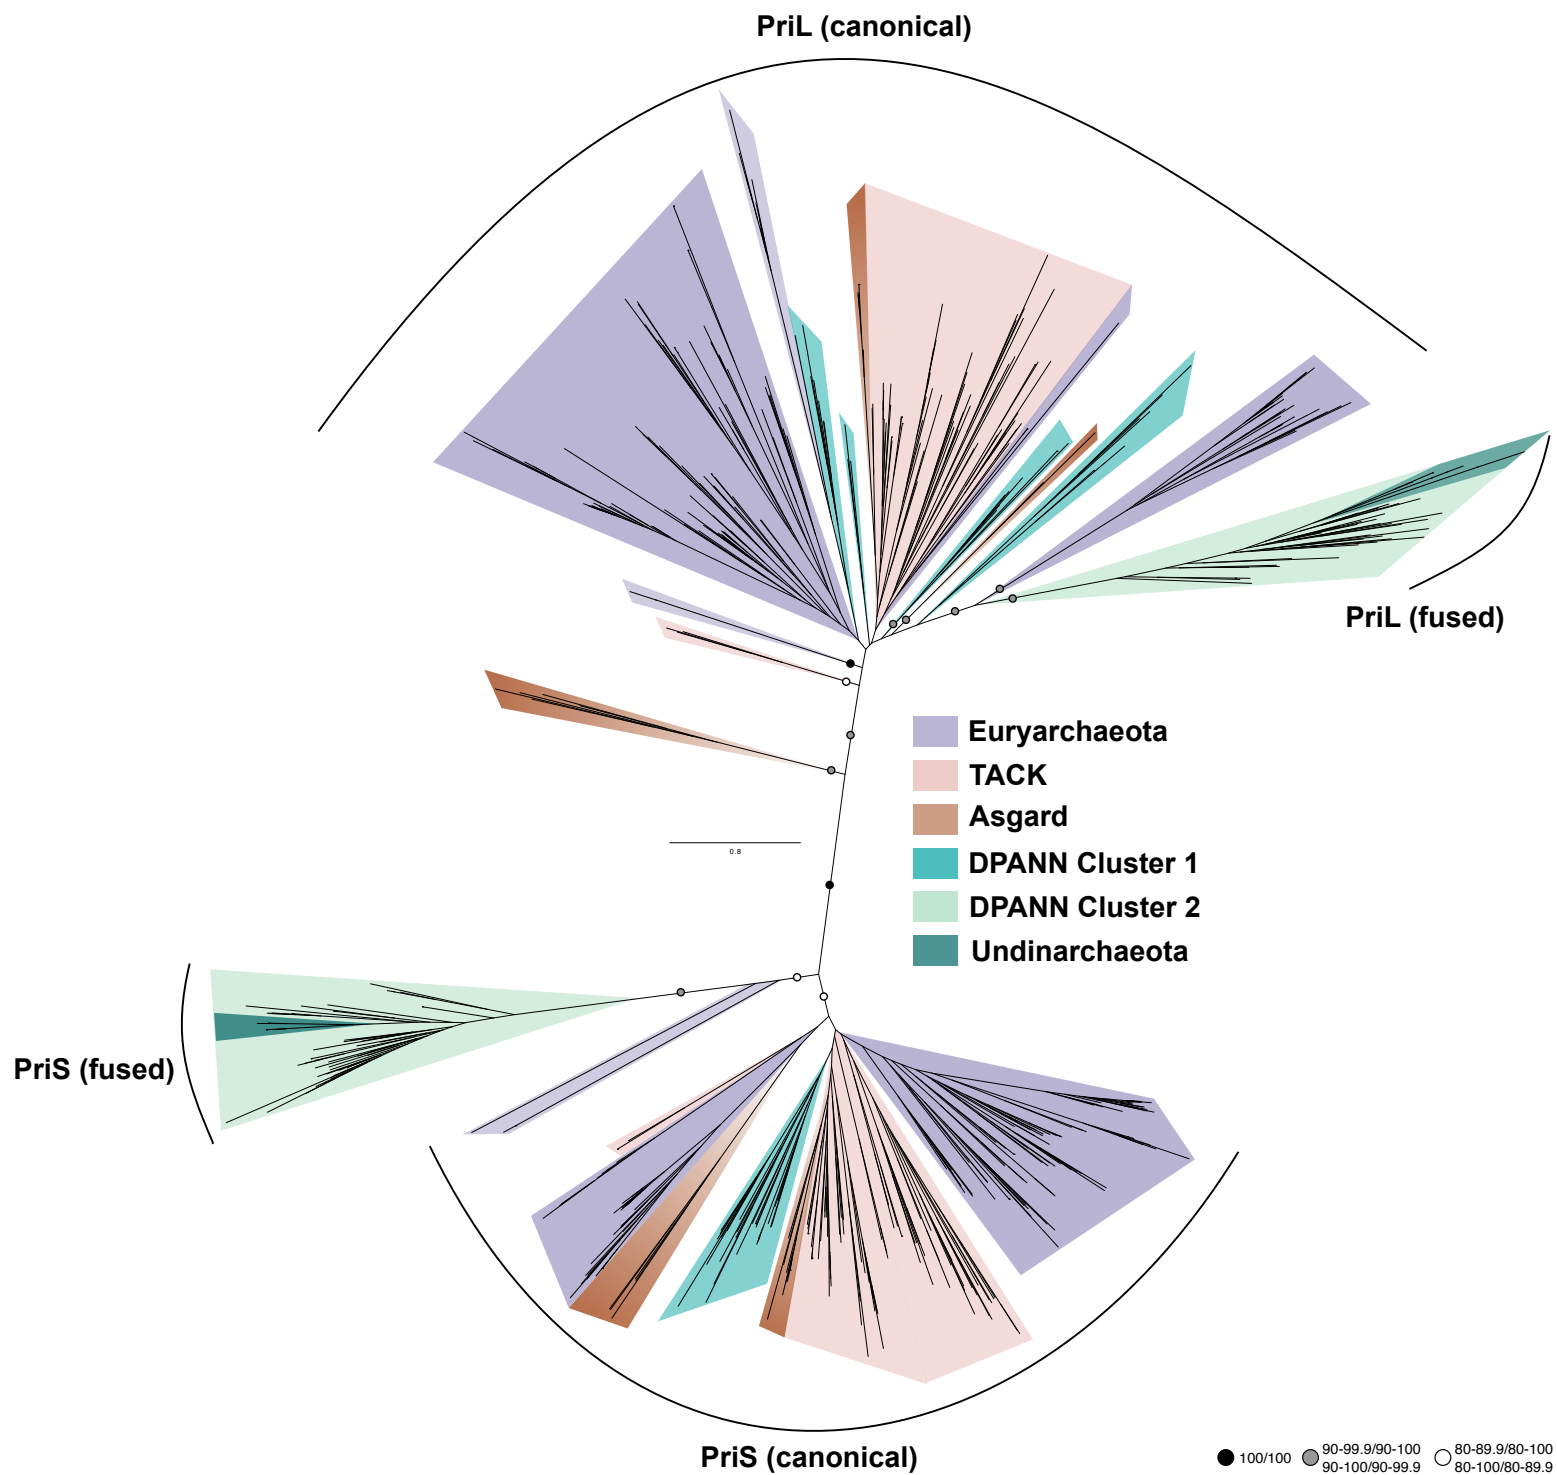 100/100
  90-99.9/90-100
  80-89.9/80-100
 

**Supplementary Figure 59 | Phylogenetic history of the primase subunits PriS and PriL in archaea.** An alignment was generated for all PriS and PriL sequences found in 364 archaea that was trimmed using TRIMAL (alignment length = 512 amino acids). The canonical PriS and PriL genes are encoded by two genes with the exception for most DPANN archaea that encode a fused version of the primase (Supplementary Data 11). These fused versions were split before aligning all sequences (n=585 sequences; see Methods for details). A maximum-likelihood phylogenetic tree was inferred with the LG+F+C10 model with an ultrafast bootstrap approximation (left) and SH-like approximate likelihood tests (right), each run with 1000 replicates. Bootstrap values above certain thresholds are indicated with colored circles. Scale bar: Average number of substitutions per site.



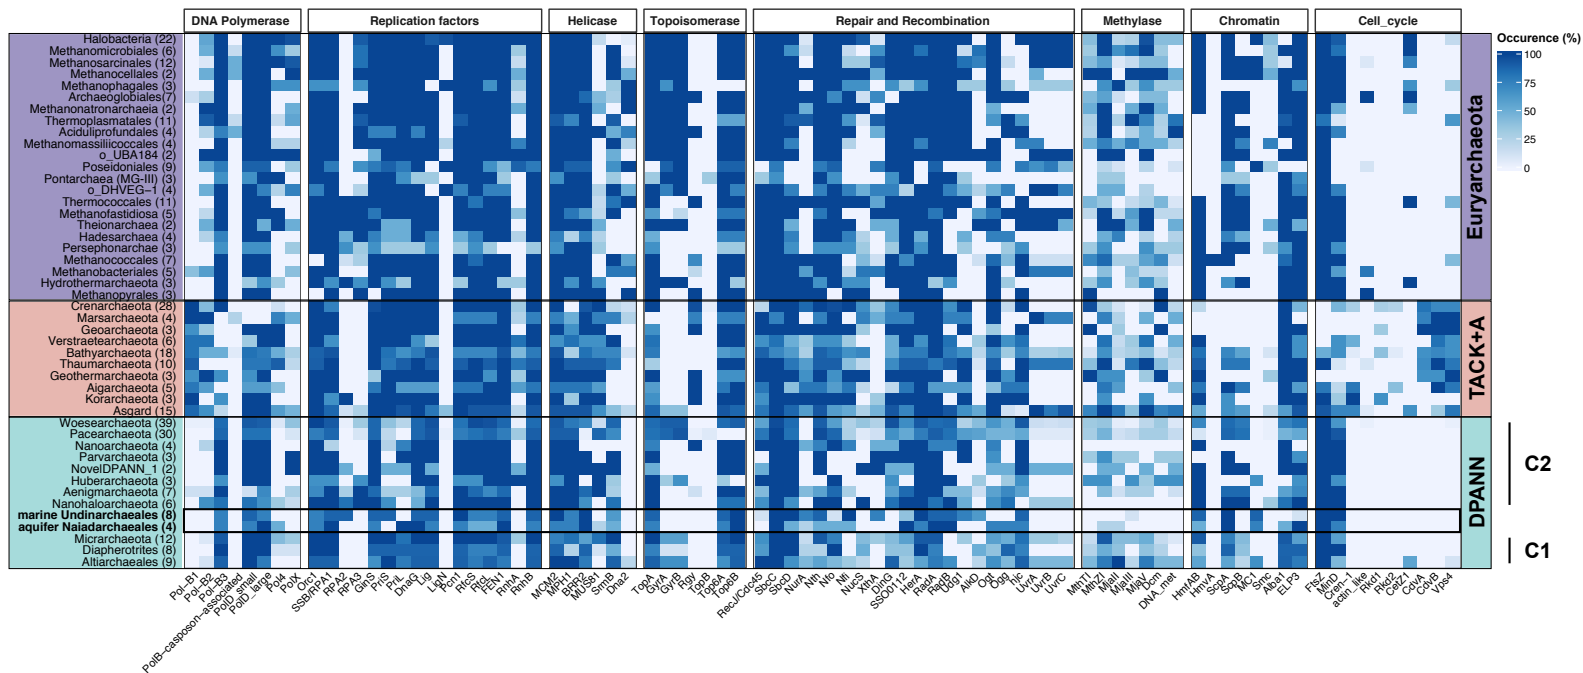

**Supplementary Figure 60 | Presence of key replication proteins across major archaeal lineages.** Heatmap of presence/absence patterns of key proteins are summarized across the total number of genomes included in each phylogenetic cluster (shown in percent). TACK + A = TACK + Asgard. Number in parentheses = number of genomes analyzed for each phylogenetic cluster. C1/C2 = Cluster1/2 DPANN archaea. Supplementary Data 24 lists the proteins used to generate the plot and Supplementary Data 9 lists the raw values.



**a**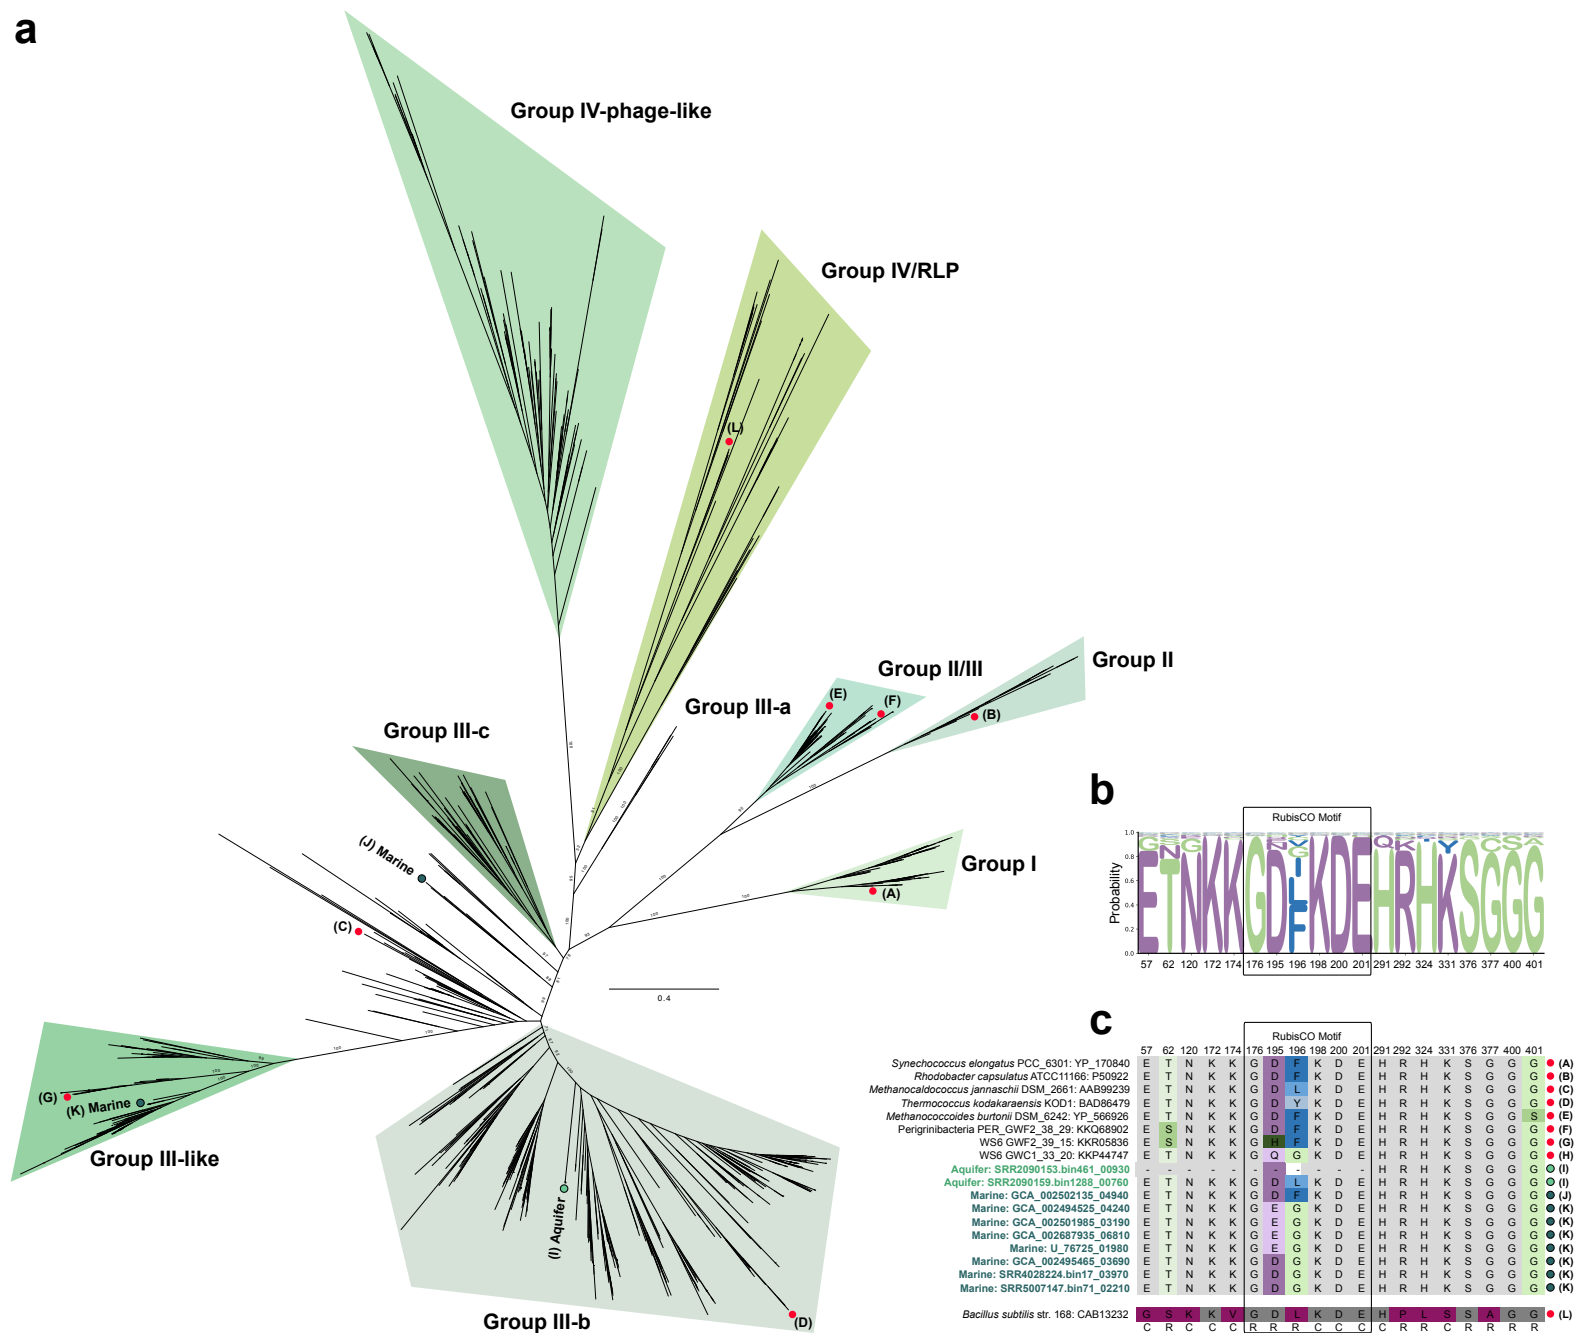

**Supplementary Figure 61 | Diversity of RubisCO proteins in archaea.** **a**, ML phylogenetic analysis of the RubisCO protein extracted from marine Undinarchaeales (dark green) and aquifer Naiadarchaeales MAGs (light green) that were added to an alignment from Jaffe et al., 2019 (n=786 sequences). The alignment was trimmed using BMGE (alignment length = 397 aa). A ML phylogenetic tree was inferred with the LG+G model with an ultrafast bootstrap approximation with 1000 replicates. Scale bar: Average number of substitutions per site. **b**, Probability plot of the occurrence of each amino acid of the catalytic site of the RubisCO protein across 786 sequences. Color-coding is based on the hydrophobicity score. **c**, Conservation of the catalytic site of selected amino acid sequences of the catalytic site compared to the reference sequence of *Synechococcus elongatus* PCC\_6301 as described by Jaffe et al., 2019. Differences in amino acid sequence compared to the reference are colored based on their hydrophobicity score and conserved sites are colored in grey. The position of each amino acid in the alignment is indicated at the top of the scheme and information on whether an amino acid represents a catalytic site (C) or RubisCO binding site (R) is indicated at the bottom. (A)-(L) = Reference sequences for different RubisCO groups.

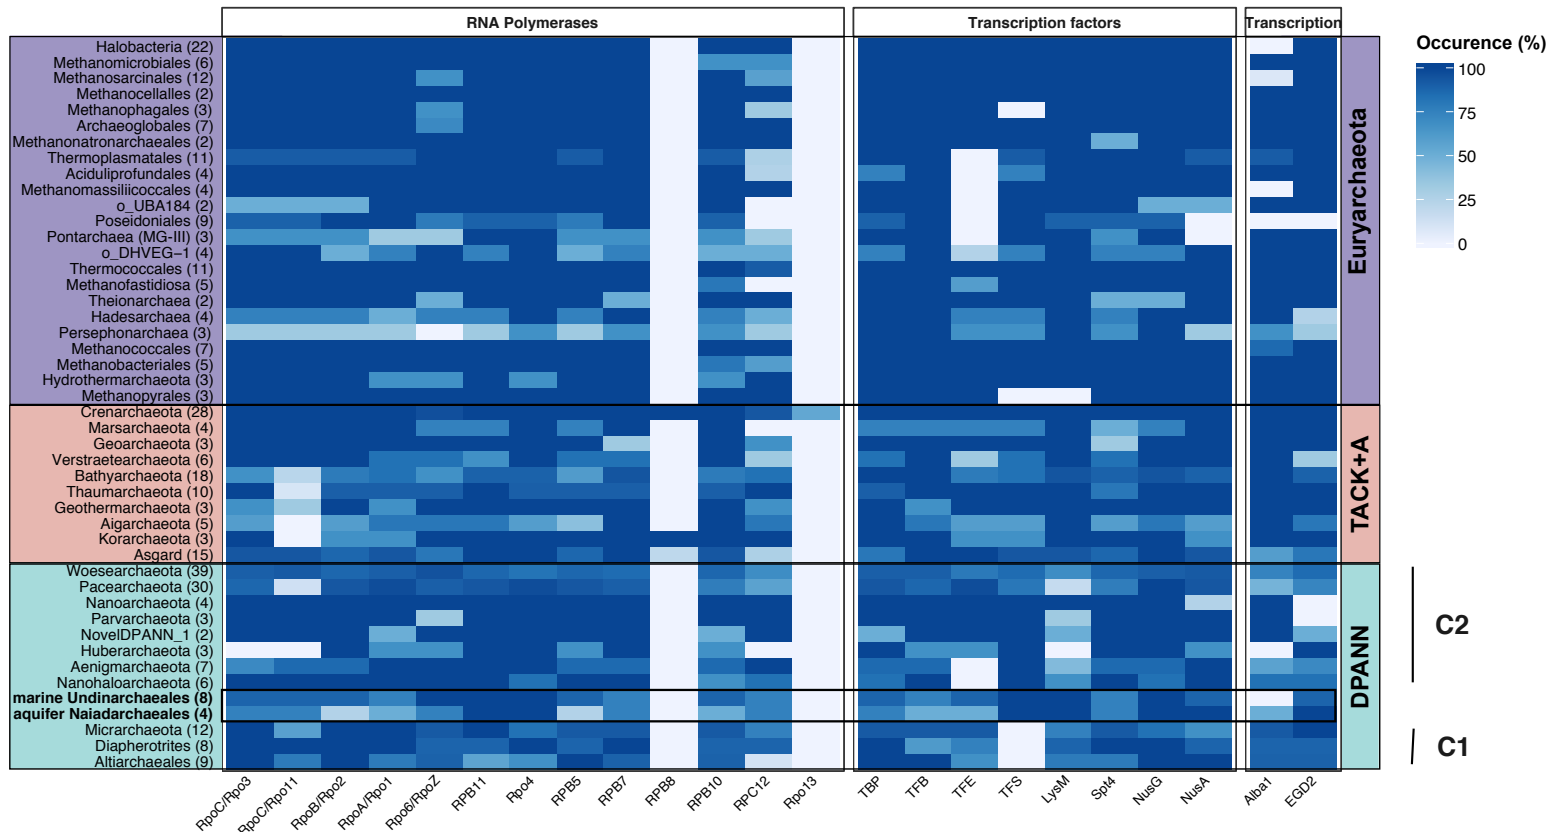

**Supplementary Figure 62 | Presence of key transcription-related proteins across major archaeal lineages.** Heatmap of presence/absence patterns of key proteins are summarized across the total number of genomes included in each phylogenetic cluster (shown in percent). TACK + A = TACK + Asgard. Number in parentheses = number of genomes analyzed for each phylogenetic cluster. C1/C2 = Cluster 1/2 DPANN archaea. Supplementary Data 24 lists the proteins used to generate the plot and Supplementary Data 9 lists the raw values.



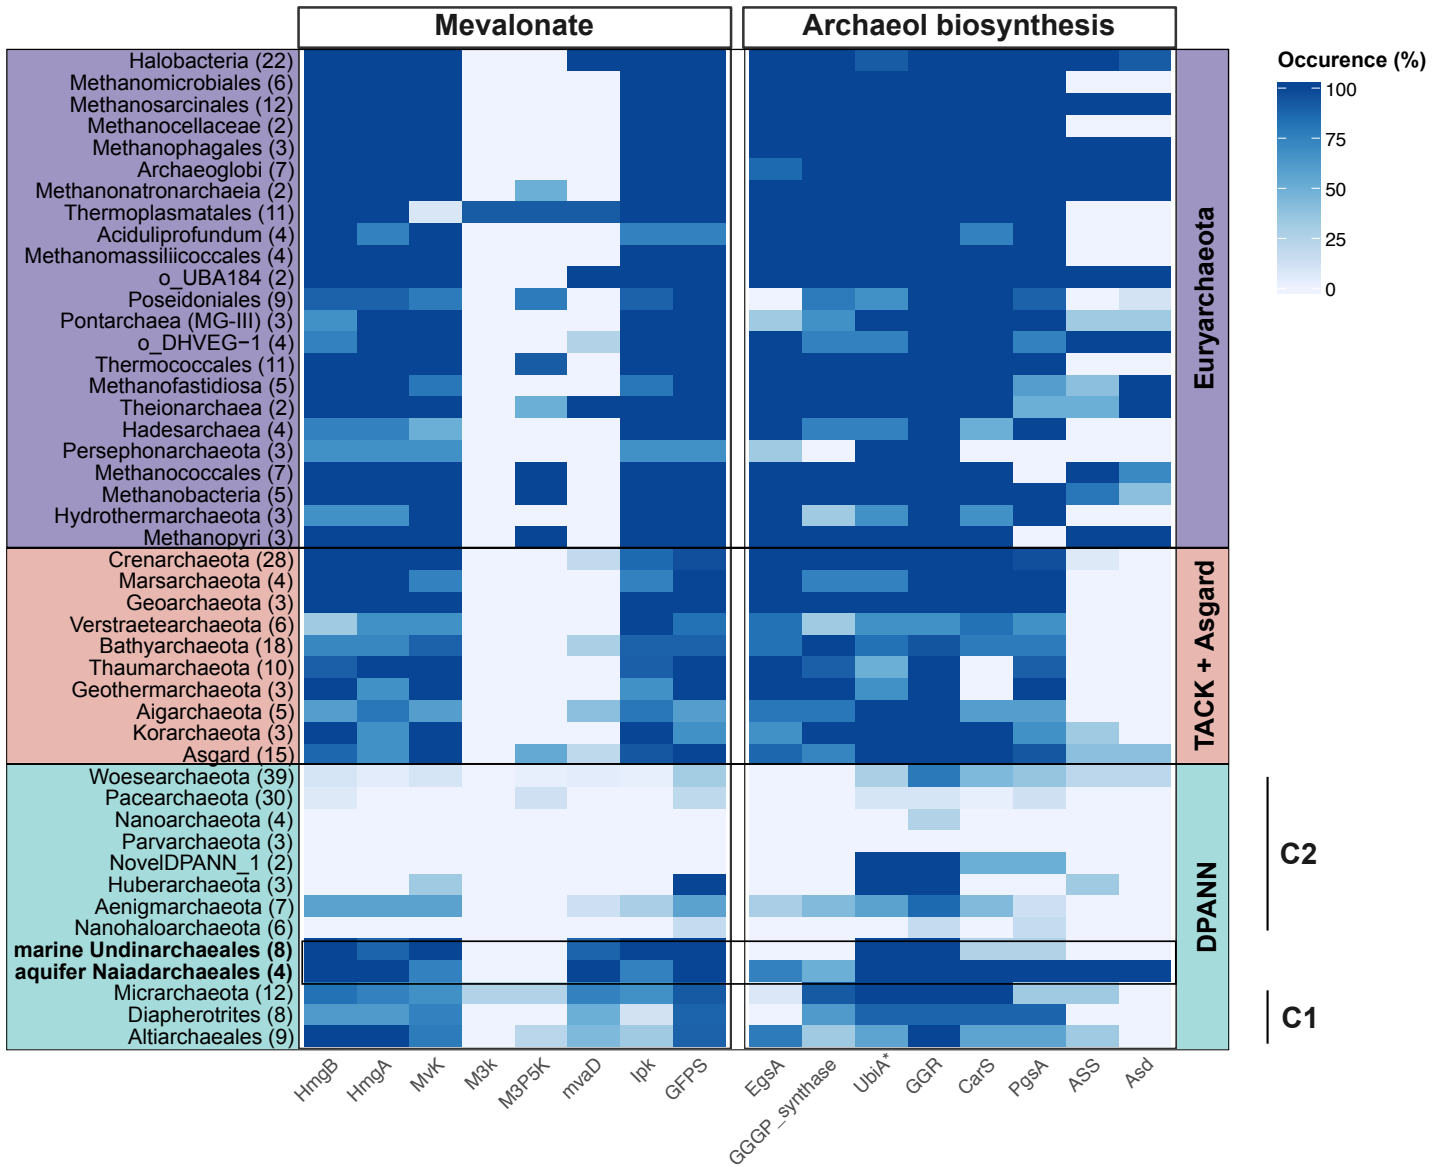

**Supplementary Figure 64 | Presence of key lipid-related proteins across major archaeal lineages.** Heatmap of presence/absence patterns of key proteins are summarized across the total number of genomes included in each phylogenetic cluster (shown in percent). TACK + A = TACK + Asgard. Number in parentheses = number of genomes analyzed for each phylogenetic cluster. C1/C2 = DPANN Cluster 1/2. Supplementary Data 24 lists the proteins used to generate the plot and Supplementary Data 9 lists the raw values. \*In Undinarchaeota only the Naidarchaeales UbiA contains a DGGGP synthase domain required for this enzyme to function in lipid biosynthesis.

**a****TIGR01025 (RPS19, 348 taxa)**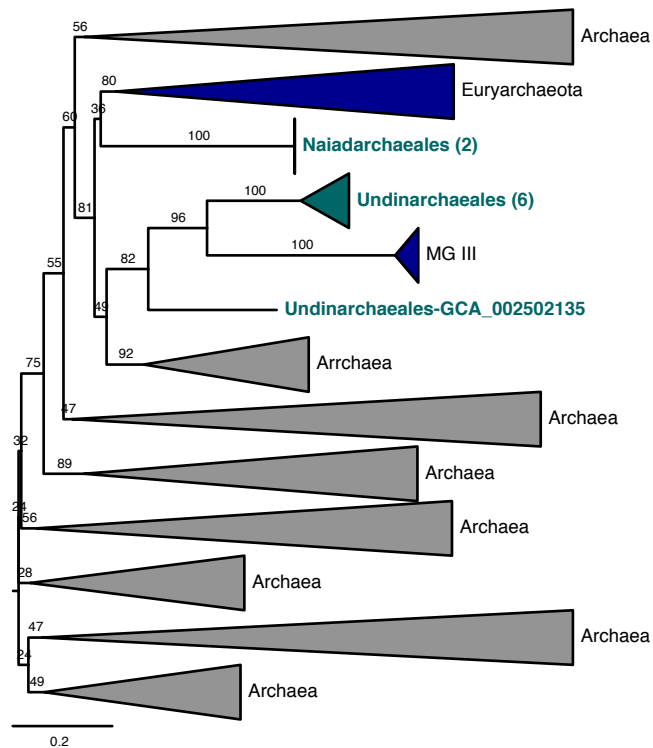**b****arCOG04099 (RPS19, 2505 taxa)**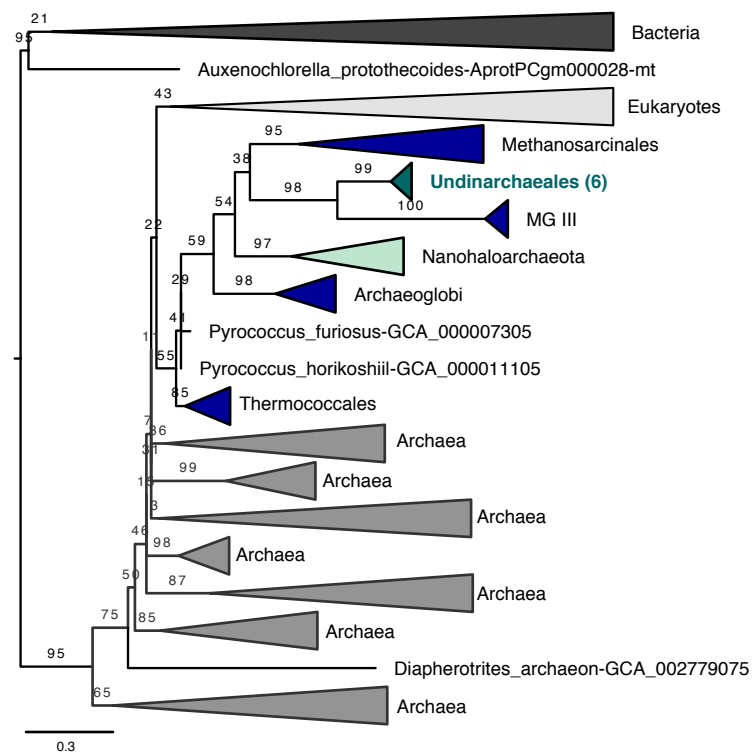**c****arCOG01028 (MK, 565 taxa)**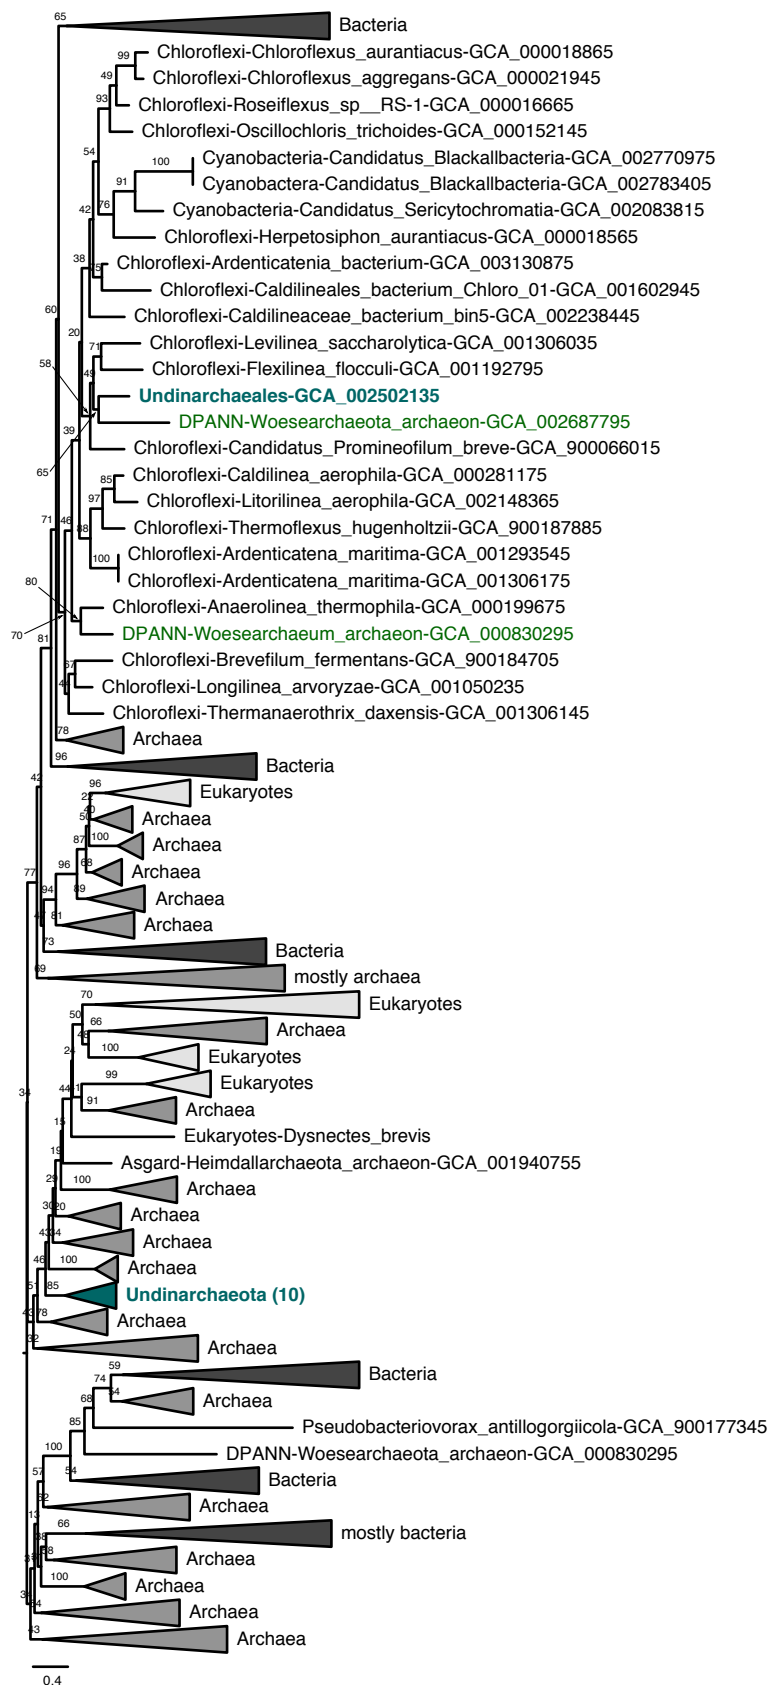

**Supplementary Figure 65 | Examples for phylogenetic trees that show potential HGTs between Undinarchaeota and other archaeal lineages. a,** Ribosomal protein S19 ( $n = 348$ , alignment length = 106 aa) extracted from the archaeal backbone and **b,** ribosomal protein S19 ( $n = 2,505$ ; alignment length = 63 aa) as well as **c,** Mevalonate kinase ( $n = 565$  taxa, alignment length = 108 aa) extracted from the archaeal, bacterial and eukaryotic genome database. A maximum-likelihood tree was generated using IQ-TREE with the LG+G model with an ultrafast bootstrap approximation run with 1000 replicates. The treefiles are provided in a repository at [zenodo.org/record/3672835](https://zenodo.org/record/3672835).



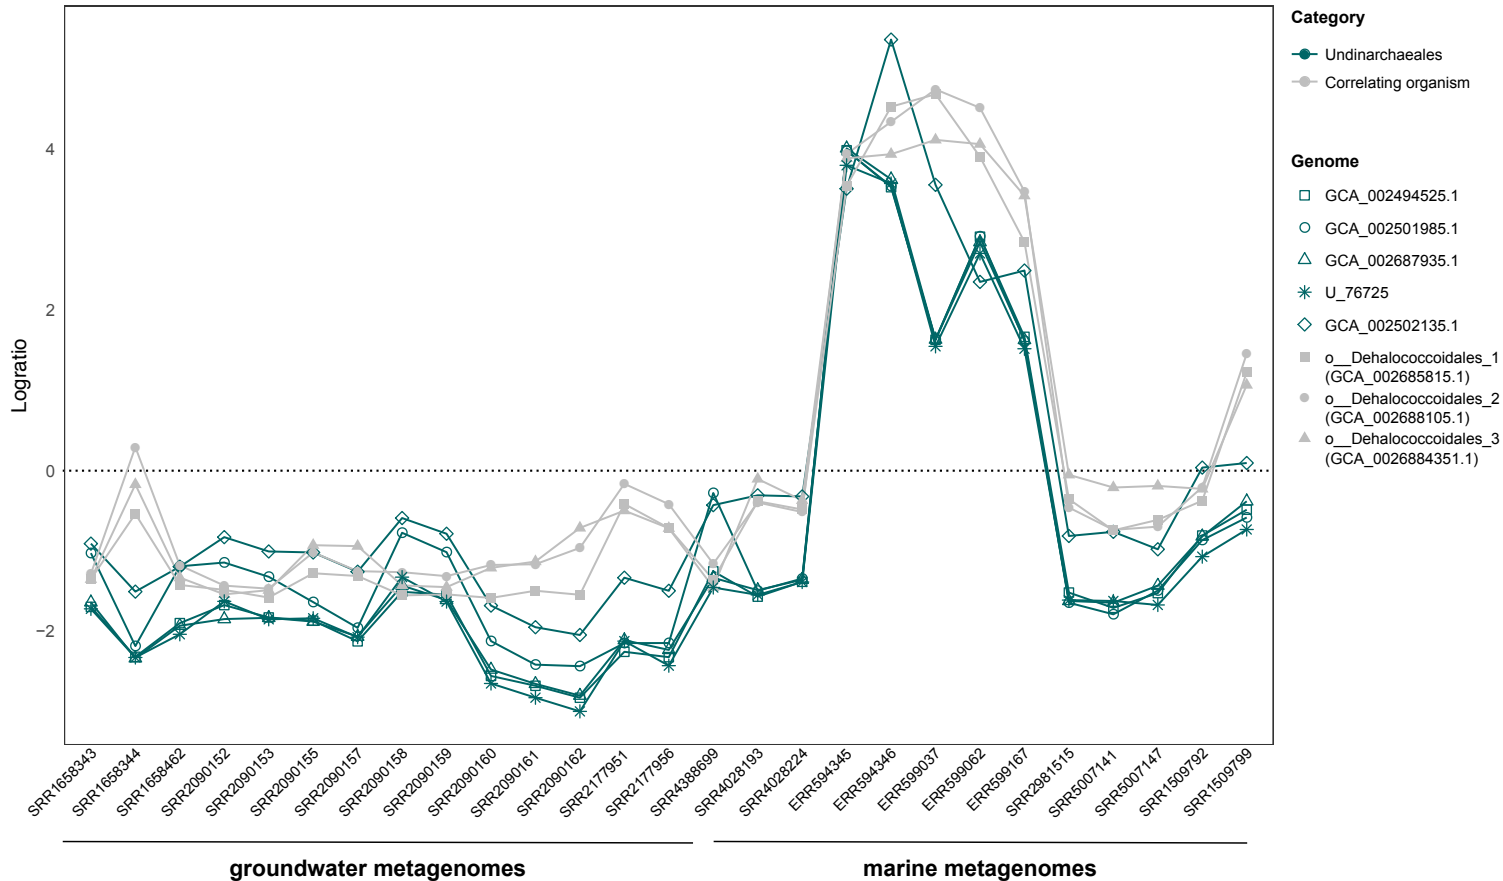

**Supplementary Figure 66 | Determining co-correlations signals of Undinarchaeota with a potential host.** 37 metagenomes containing reads assigned to Undinarchaeota (Supplementary Data 1) were aligned to a reference database of 6,890 archaeal and bacterial genomes. Proportionality was calculated based on normalized relative abundances and centered log-ratio transformation. Genomes shown in this graph were proportional ( $\rho \geq 0.9$ ) to more than one Undinarchaeota MAG and thus were inferred as Undinarchaeota co-correlated.

## 750 **Supplementary References**

751

752 1. Parks, D. H., Imelfort, M., Skennerton, C. T., Hugenholtz, P. & Tyson, G. W. CheckM: assessing the  
753 quality of microbial genomes recovered from isolates, single cells, and metagenomes. *Genome*  
754 *Research* **25**, 1043–1055 (2015).

755 2. Buchfink, B., Xie, C. & Huson, D. H. Fast and sensitive protein alignment using DIAMOND. *Nature*  
756 *Methods* **12**, 59–60 (2015).

757 3. Deschamps, P., Zivanovic, Y., Moreira, D., Rodriguez-Valera, F. & López-García, P. Pangenome  
758 evidence for extensive interdomain horizontal transfer affecting lineage core and shell genes in  
759 uncultured planktonic Thaumarchaeota and Euryarchaeota. *Genome Biol Evol* **6**, 1549–1563 (2014).

760 4. Castelle, C. J. & Banfield, J. F. Major new microbial groups expand diversity and alter our  
761 understanding of the tree of life. *Cell* **172**, 1181–1197 (2018).

762 5. Parks, D. H. *et al.* Recovery of nearly 8,000 metagenome-assembled genomes substantially expands  
763 the tree of life. *Nature Microbiology* **2**, 1533–1542 (2017).

764 6. Chaumeil, P.-A., Mussig, A. J., Hugenholtz, P. & Parks, D. H. GTDB-Tk: a toolkit to classify genomes  
765 with the Genome Taxonomy Database. *Bioinformatics* (2019) doi:10.1093/bioinformatics/btz848.

766 7. Darling, A. E. *et al.* PhyloSift: phylogenetic analysis of genomes and metagenomes. *PeerJ* **2**, e243  
767 (2014).

768 8. Zaremba-Niedzwiedzka, K. *et al.* Asgard archaea illuminate the origin of eukaryotic cellular  
769 complexity. *Nature* **541**, 353–358 (2017).

770 9. Narowe, A. B. *et al.* Complex evolutionary history of translation elongation factor 2 and diphthamide  
771 biosynthesis in Archaea and Parabasalids. *Genome Biol Evol* **10**, 2380–2393 (2018).

772 10. Probst, A. J. *et al.* Biology of a widespread uncultivated archaeon that contributes to carbon fixation  
773 in the subsurface. *Nature Communications* **5**, 5497 (2014).

- 774 11. Bird, J. T., Baker, B. J., Probst, A. J., Podar, M. & Lloyd, K. G. Culture independent genomic comparisons  
775 reveal environmental adaptations for Altiarchaeales. *Front Microbiol* **7**, (2016).
- 776 12. Hug, L. A. *et al.* A new view of the tree of life. *Nature Microbiology* **1**, 16048 (2016).
- 777 13. Adam, P. S., Borrel, G., Brochier-Armanet, C. & Gribaldo, S. The growing tree of Archaea: new  
778 perspectives on their diversity, evolution and ecology. *The ISME Journal* **11**, 2407–2425 (2017).
- 779 14. Spang, A., Caceres, E. F. & Ettema, T. J. G. Genomic exploration of the diversity, ecology, and evolution  
780 of the archaeal domain of life. *Science* **357**, (2017).
- 781 15. Kostka, M., Uzlikova, M., Cepicka, I. & Flegr, J. SlowFaster, a user-friendly program for slow-fast  
782 analysis and its application on phylogeny of Blastocystis. *BMC Bioinformatics* **9**, 341 (2008).
- 783 16. Silva, F. J. & Santos-Garcia, D. Slow and fast evolving endosymbiont lineages: Positive correlation  
784 between the rates of synonymous and non-synonymous substitution. *Front. Microbiol.* **6**, (2015).
- 785 17. Foster, P. G. & Hickey, D. A. Compositional bias may affect both DNA-based and protein-based  
786 phylogenetic reconstructions. *J Mol Evol* **48**, 284–290 (1999).
- 787 18. Foster, P. G. Modeling compositional heterogeneity. *Syst Biol* **53**, 485–495 (2004).
- 788 19. Sorokin, D. Y. *et al.* Discovery of extremely halophilic, methyl-reducing euryarchaea provides insights  
789 into the evolutionary origin of methanogenesis. *Nature Microbiology* **2**, 17081 (2017).
- 790 20. Aouad, M., Borrel, G., Brochier-Armanet, C. & Gribaldo, S. Evolutionary placement of  
791 Methanonatronarchaea. *Nature Microbiology* **4**, 558 (2019).
- 792 21. Bergsten, J. A review of long-branch attraction. *Cladistics* **21**, 163–193 (2005).
- 793 22. Galtier, N. & Lobry, J. R. Relationships between genomic G+C content, RNA secondary structures, and  
794 optimal growth temperature in prokaryotes. *J Mol Evol* **44**, 632–636 (1997).
- 795 23. Groussin, M. & Gouy, M. Adaptation to environmental temperature is a major determinant of  
796 molecular evolutionary rates in Archaea. *Mol Biol Evol* **28**, 2661–2674 (2011).

- 797 24. Williams, T. A. *et al.* Integrative modeling of gene and genome evolution roots the archaeal tree of  
798 life. *PNAS* **114**, E4602–E4611 (2017).
- 799 25. Moran, N. A., McCutcheon, J. P. & Nakabachi, A. Genomics and evolution of heritable bacterial  
800 symbionts. *Annu. Rev. Genet.* **42**, 165–190 (2008).
- 801 26. Raymann, K., Forterre, P., Brochier-Armanet, C. & Gribaldo, S. Global phylogenomic analysis  
802 disentangles the complex evolutionary history of DNA replication in Archaea. *Genome Biol Evol* **6**,  
803 192–212 (2014).
- 804 27. Gabelle, D., Filée, J., Buhler, C. & Forterre, P. Phylogenomics of type II DNA topoisomerases. *BioEssays*  
805 **25**, 232–242 (2003).
- 806 28. Forterre, P., Gribaldo, S., Gabelle, D. & Serre, M.-C. Origin and evolution of DNA topoisomerases.  
807 *Biochimie* **89**, 427–446 (2007).
- 808 29. Forterre, P. A hot story from comparative genomics: reverse gyrase is the only hyperthermophile-  
809 specific protein. *Trends in Genetics* **18**, 236–237 (2002).
- 810 30. Brochier-Armanet, C. & Forterre, P. Widespread distribution of archaeal reverse gyrase in  
811 thermophilic bacteria suggests a complex history of vertical inheritance and lateral gene transfers.  
812 *Archaea* **2**, 83–93 (2007).
- 813 31. Catchpole, R. J. & Forterre, P. The evolution of reverse gyrase suggests a nonhyperthermophilic last  
814 universal common ancestor. *Mol Biol Evol* **36**, 2737–2747 (2019).
- 815 32. López-García, P., Zivanovic, Y., Deschamps, P. & Moreira, D. Bacterial gene import and mesophilic  
816 adaptation in archaea. *Nat Rev Microbiol* **13**, 447–456 (2015).
- 817 33. Lipscomb, G. L., Hahn, E. M., Crowley, A. T. & Adams, M. W. W. Reverse gyrase is essential for  
818 microbial growth at 95 °C. *Extremophiles* **21**, 603–608 (2017).
- 819 34. Bernander, R. The archaeal cell cycle: current issues. *Molecular Microbiology* **48**, 599–604 (2003).

- 820 35. Imbert, M. *et al.* Conformational study of the chromosomal protein MC1 from the archaeobacterium  
821 *Methanosarcina barkeri*. *Biochimica et Biophysica Acta (BBA) - Protein Structure and Molecular*  
822 *Enzymology* **1038**, 346–354 (1990).
- 823 36. De Vuyst, G., Aci, S., Genest, D. & Culard, F. Atypical recognition of particular DNA sequences by the  
824 archaeal chromosomal MC1 protein. *Biochemistry* **44**, 10369–10377 (2005).
- 825 37. Loth, K., Landon, C. & Paquet, F. Chemical shifts assignments of the archaeal MC1 protein and a  
826 strongly bent 15 base pairs DNA duplex in complex. *Biomol NMR Assign* **9**, 215–217 (2015).
- 827 38. Jun, S.-H., Reichlen, M. J., Tajiri, M. & Murakami, K. S. Archaeal RNA polymerase and transcription  
828 regulation. *Crit Rev Biochem Mol Biol* **46**, 27–40 (2011).
- 829 39. Koonin, E. V., Makarova, K. S. & Elkins, J. G. Orthologs of the small RPB8 subunit of the eukaryotic RNA  
830 polymerases are conserved in hyperthermophilic Crenarchaeota and ‘Korarchaeota’. *Biol Direct* **2**, 38  
831 (2007).
- 832 40. Constantinescu-Aruxandei, D., Petrovic-Stojanovska, B., Penedo, J. C., White, M. F. & Naismith, J. H.  
833 Mechanism of DNA loading by the DNA repair helicase XPD. *Nucleic Acids Res* **44**, 2806–2815 (2016).
- 834 41. Lecompte, O., Ripp, R., Thierry, J.-C., Moras, D. & Poch, O. Comparative analysis of ribosomal proteins  
835 in complete genomes: an example of reductive evolution at the domain scale. *Nucleic Acids Res* **30**,  
836 5382–5390 (2002).
- 837 42. Wang, J., Dasgupta, I. & Fox, G. E. Many nonuniversal archaeal ribosomal proteins are found in  
838 conserved gene clusters. *Archaea* **2**, 241–251 (2009).
- 839 43. Herve, C. du P. *et al.* The NMR solution structure of the 30S ribosomal protein S27e encoded in gene  
840 RS27\_ARCFU of *Archaeoglobus fulgidis* reveals a novel protein fold. *Protein Sci* **13**, 1407–1416 (2004).
- 841 44. Benelli, D. & Londei, P. Translation initiation in Archaea: conserved and domain-specific features.  
842 *Biochemical Society Transactions* **39**, 89–93 (2011).



- 843 45. Becker, T. *et al.* Structural basis of highly conserved ribosome recycling in eukaryotes and archaea.  
844 *Nature* **482**, 501–506 (2012).
- 845 46. Nürenberg, E. & Tampé, R. Tying up loose ends: ribosome recycling in eukaryotes and archaea. *Trends*  
846 *in Biochemical Sciences* **38**, 64–74 (2013).
- 847 47. Duval, M. *et al.* HflXr, a homolog of a ribosome-splitting factor, mediates antibiotic resistance. *PNAS*  
848 **115**, 13359–13364 (2018).
- 849 48. Büttner, K., Wenig, K. & Hopfner, K.-P. Structural framework for the mechanism of archaeal exosomes  
850 in RNA processing. *Molecular Cell* **20**, 461–471 (2005).
- 851 49. Roppelt, V., Klug, G. & Evguenieva-Hackenberg, E. The evolutionarily conserved subunits Rrp4 and  
852 Csl4 confer different substrate specificities to the archaeal exosome. *FEBS Letters* **584**, 2931–2936  
853 (2010).
- 854 50. Evguenieva-Hackenberg, E., Hou, L., Glaeser, S. & Klug, G. Structure and function of the archaeal  
855 exosome. *Wiley Interdisciplinary Reviews: RNA* **5**, 623–635 (2014).
- 856 51. de Crécy-Lagard, V. *et al.* Biosynthesis of wyosine derivatives in tRNA: An ancient and highly diverse  
857 pathway in Archaea. *Mol Biol Evol* **27**, 2062–2077 (2010).
- 858 52. Schormann, N., Ricciardi, R. & Chattopadhyay, D. Uracil-DNA glycosylases—Structural and functional  
859 perspectives on an essential family of DNA repair enzymes. *Protein Sci* **23**, 1667–1685 (2014).
- 860 53. Perugino, G. *et al.* Activity and regulation of archaeal DNA alkyltransferase. *J Biol Chem* **287**, 4222–  
861 4231 (2012).
- 862 54. Faucher, F., Wallace, S. S. & Doublé, S. The C-terminal lysine of Ogg2 DNA glycosylases is a major  
863 molecular determinant for guanine/8-oxoguanine distinction. *J Mol Biol* **397**, 46–56 (2010).
- 864 55. Montfort, R. V., Slingsby, C. & Vierling, E. Structure and function of the small heat shock protein/ $\alpha$ -  
865 crystallin family of molecular chaperones. in *Advances in Protein Chemistry* vol. 59 105–156  
866 (Academic Press, 2001).

- 867 56. Nivière, V. & Fontecave, M. Discovery of superoxide reductase: an historical perspective. *J Biol Inorg*  
868 *Chem* **9**, 119–123 (2004).
- 869 57. Perkins, A., Nelson, K. J., Parsonage, D., Poole, L. B. & Karplus, P. A. Peroxiredoxins: guardians against  
870 oxidative stress and modulators of peroxide signaling. *Trends Biochem Sci* **40**, 435–445 (2015).
- 871 58. Susanti, D., Loganathan, U., Compton, A. & Mukhopadhyay, B. A reexamination of thioredoxin  
872 reductase from *Thermoplasma acidophilum*, a thermoacidophilic Euryarchaeon, identifies it as an  
873 NADH-dependent enzyme. *ACS Omega* **2**, 4180–4187 (2017).
- 874 59. Pajor, A. M. Molecular properties of the SLC13 family of dicarboxylate and sulfate transporters.  
875 *Pflugers Arch.* **451**, 597–605 (2006).
- 876 60. Batista-García, R. A. *et al.* A novel TctA citrate transporter from an activated sludge metagenome:  
877 Structural and mechanistic predictions for the TTT family. *Proteins: Structure, Function, and*  
878 *Bioinformatics* **82**, 1756–1764 (2014).
- 879 61. Wood, J. M. Bacterial responses to osmotic challenges. *J Gen Physiol* **145**, 381–388 (2015).
- 880 62. Martin, D. D., Ciulla, R. A. & Roberts, M. F. Osmoadaptation in Archaea. *Appl Environ Microbiol* **65**,  
881 1815–1825 (1999).
- 882 63. Oren, A. Pyruvate: a key nutrient in hypersaline environments? *Microorganisms* **3**, 407–416 (2015).
- 883 64. Levy, S., Portnoy, V., Admon, J. & Schuster, G. Distinct activities of several RNase J proteins in  
884 methanogenic archaea. *RNA Biology* **8**, 1073–1083 (2011).
- 885 65. Mulcahy, H., Charron-Mazenod, L. & Lewenza, S. *Pseudomonas aeruginosa* produces an extracellular  
886 deoxyribonuclease that is required for utilization of DNA as a nutrient source. *Environmental*  
887 *Microbiology* **12**, 1621–1629 (2010).
- 888 66. Chimileski, S., Dolas, K., Naor, A., Gophna, U. & Papke, R. T. Extracellular DNA metabolism in *Haloferax*  
889 *volcanii*. *Frontiers in Microbiology* **5**, (2014).

- 890 67. Sato, T., Atomi, H. & Imanaka, T. Archaeal type III RuBisCOs function in a pathway for AMP  
891 metabolism. *Science* **315**, 1003–1006 (2007).
- 892 68. Aono, R., Sato, T., Imanaka, T. & Atomi, H. A pentose bisphosphate pathway for nucleoside  
893 degradation in Archaea. *Nature Chemical Biology* **11**, 355–360 (2015).
- 894 69. Wrighton, K. C. *et al.* RubisCO of a nucleoside pathway known from Archaea is found in diverse  
895 uncultivated phyla in bacteria. *ISME J* **10**, 2702–2714 (2016).
- 896 70. Jaffe, A. L., Castelle, C. J., Dupont, C. L. & Banfield, J. F. Lateral gene transfer shapes the distribution  
897 of RuBisCO among Candidate Phyla Radiation bacteria and DPANN archaea. *Mol Biol Evol* **36**, 435–  
898 446 (2019).
- 899 71. Finn, M. W. & Tabita, F. R. Synthesis of catalytically active Form III ribulose 1,5-bisphosphate  
900 carboxylase/oxygenase in Archaea. *J Bacteriol* **185**, 3049–3059 (2003).
- 901 72. Sakuraba, H., Utsumi, E., Kujo, C. & Ohshima, T. An AMP-Dependent (ATP-Forming) kinase in the  
902 hyperthermophilic archaeon *Pyrococcus furiosus*: Characterization and novel physiological role.  
903 *Archives of Biochemistry and Biophysics* **364**, 125–128 (1999).
- 904 73. Hutchins, A. M., Holden, J. F. & Adams, M. W. W. Phosphoenolpyruvate Synthetase from the  
905 hyperthermophilic archaeon *Pyrococcus furiosus*. *J Bacteriol* **183**, 709–715 (2001).
- 906 74. Haferkamp, P. *et al.* The carbon switch at the level of pyruvate and phosphoenolpyruvate in  
907 *Sulfolobus solfataricus* P2. *Front. Microbiol.* **10**, (2019).
- 908 75. Castelle, C. J. *et al.* Biosynthetic capacity, metabolic variety and unusual biology in the CPR and DPANN  
909 radiations. *Nature Reviews Microbiology* **16**, 629–645 (2018).
- 910 76. Bräsen, C., Esser, D., Rauch, B. & Siebers, B. Carbohydrate metabolism in Archaea: Current insights  
911 into unusual enzymes and pathways and their regulation. *Microbiol Mol Biol Rev* **78**, 89–175 (2014).
- 912 77. Say, R. F. & Fuchs, G. Fructose 1,6-bisphosphate aldolase/phosphatase may be an ancestral  
913 gluconeogenic enzyme. *Nature* **464**, 1077–1081 (2010).

- 914 78. Spaans, S. K., Weusthuis, R. A., van der Oost, J. & Kengen, S. W. M. NADPH-generating systems in  
915 bacteria and archaea. *Front Microbiol* **6**, (2015).
- 916 79. Garavaglia, S., Raffaelli, N., Finaurini, L., Magni, G. & Rizzi, M. A Novel Fold Revealed by  
917 Mycobacterium tuberculosis NAD Kinase, a Key Allosteric Enzyme in NADP Biosynthesis. *J. Biol. Chem.*  
918 **279**, 40980–40986 (2004).
- 919 80. Szaszák, M. *et al.* Fluorescence Lifetime Imaging Unravels C. trachomatis Metabolism and Its Crosstalk  
920 with the Host Cell. *PLoS Pathog* **7**, (2011).
- 921 81. Malinen, A. M., Belogurov, G. A., Baykov, A. A. & Lahti, R. Na<sup>+</sup>-Pyrophosphatase: A Novel Primary  
922 Sodium Pump. *Biochemistry* **46**, 8872–8878 (2007).
- 923 82. Pérez-Castiñeira, J. R., López-Marqués, R. L., Losada, M. & Serrano, A. A thermostable K<sup>+</sup>-stimulated  
924 vacuolar-type pyrophosphatase from the hyperthermophilic bacterium Thermotoga maritima. *FEBS*  
925 *Letters* **496**, 6–11 (2001).
- 926 83. Baykov, A. A., Malinen, A. M., Luoto, H. H. & Lahti, R. Pyrophosphate-fueled Na<sup>+</sup> and H<sup>+</sup> transport in  
927 prokaryotes. *Microbiol. Mol. Biol. Rev.* **77**, 267–276 (2013).
- 928 84. Dombrowski, N., Lee, J.-H., Williams, T. A., Offre, P. & Spang, A. Genomic diversity, lifestyles and  
929 evolutionary origins of DPANN archaea. *FEMS Microbiol Lett* **366**, (2019).
- 930 85. Brown, A. M., Hoopes, S. L., White, R. H. & Sarisky, C. A. Purine biosynthesis in archaea: variations on  
931 a theme. *Biol Direct* **6**, 63 (2011).
- 932 86. Armenta-Medina, D., Segovia, L. & Perez-Rueda, E. Comparative genomics of nucleotide metabolism:  
933 a tour to the past of the three cellular domains of life. *BMC Genomics* **15**, (2014).
- 934 87. Giménez, M. I., Cerletti, M. & De Castro, R. E. Archaeal membrane-associated proteases: insights on  
935 Haloferax volcanii and other haloarchaea. *Front Microbiol* **6**, (2015).

- 936 88. Rahman, R. N. Z. A., Fujiwara, S., Takagi, M. & Imanaka, T. Sequence analysis of glutamate  
937 dehydrogenase (GDH) from the hyperthermophilic archaeon *Pyrococcus* sp. KOD1 and comparison of  
938 the enzymatic characteristics of native and recombinant GDHs. *Mol Gen Genet* **257**, 338–347 (1998).
- 939 89. Iwasaki, T. Iron-Sulfur World in Aerobic and Hyperthermoacidophilic Archaea *Sulfolobus*. *Archaea*  
940 <https://www.hindawi.com/journals/archaea/2010/842639/> (2010) doi:10.1155/2010/842639.
- 941 90. Helgadóttir, S., Rosas-Sandoval, G., Söll, D. & Graham, D. E. Biosynthesis of phosphoserine in the  
942 Methanococcales. *Journal of Bacteriology* **189**, 575–582 (2007).
- 943 91. Villanueva, L., Schouten, S. & Damsté, J. S. S. Phylogenomic analysis of lipid biosynthetic genes of  
944 Archaea shed light on the ‘lipid divide’. *Environ Microbiol* **19**, 54–69 (2017).
- 945 92. Waters, E. *et al.* The genome of Nanoarchaeum equitans: Insights into early archaeal evolution and  
946 derived parasitism. *Proc Natl Acad Sci U S A* **100**, 12984–12988 (2003).
- 947 93. Jahn, U., Summons, R., Sturt, H., Grosjean, E. & Huber, H. Composition of the lipids of Nanoarchaeum  
948 equitans and their origin from its host *Ignicoccus* sp. strain KIN4/l. *Arch Microbiol* **182**, 404–413  
949 (2004).
- 950 94. Hamm, J. N. *et al.* Unexpected host dependency of Antarctic Nanohaloarchaeota. *PNAS* **116**, 14661–  
951 14670 (2019).
- 952 95. Ohnuma, S., Suzuki, M. & Nishino, T. Archaeobacterial ether-linked lipid biosynthetic gene. Expression  
953 cloning, sequencing, and characterization of geranylgeranyl-diphosphate synthase. *J. Biol. Chem.* **269**,  
954 14792–14797 (1994).
- 955 96. Hemmi, H., Yamashita, S., Shimoyama, T., Nakayama, T. & Nishino, T. Cloning, expression, and  
956 characterization of cis-polyprenyl diphosphate synthase from the thermoacidophilic archaeon  
957 *Sulfolobus acidocaldarius*. *J Bacteriol* **183**, 401–404 (2001).
- 958 97. Peretó, J., López-García, P. & Moreira, D. Ancestral lipid biosynthesis and early membrane evolution.  
959 *Trends in Biochemical Sciences* **29**, 469–477 (2004).



- 960 98. Chen, A., Zhang, D. & Poulter, C. D. (S)-geranylgeranyl glyceryl phosphate synthase. Purification and  
961 characterization of the first pathway-specific enzyme in archaeobacterial membrane lipid biosynthesis.  
962 *J. Biol. Chem.* **268**, 21701–21705 (1993).
- 963 99. Jain, S. *et al.* Identification of CDP-Archaeol Synthase, a Missing Link of Ether Lipid Biosynthesis in  
964 Archaea. *Chemistry & Biology* **21**, 1392–1401 (2014).
- 965 100. Daiyasu, H. *et al.* A study of archaeal enzymes involved in polar lipid synthesis linking amino acid  
966 sequence information, genomic contexts and lipid composition. *Archaea* **1**, 399–410 (2005).
- 967 101. Shimosaka, T., Makarova, K. S., Koonin, E. V. & Atomi, H. Identification of dephospho-coenzyme  
968 A (dephospho-CoA) kinase in *Thermococcus kodakarensis* and elucidation of the entire CoA  
969 biosynthesis pathway in Archaea. *mBio* **10**, (2019).
- 970 102. Jarrell, K. F., Ding, Y., Nair, D. B. & Siu, S. Surface appendages of Archaea: Structure, function,  
971 genetics and assembly. *Life (Basel)* **3**, 86–117 (2013).
- 972 103. Albers, S.-V. & Jarrell, K. F. The archaeellum: an update on the unique archaeal motility structure.  
973 *Trends in Microbiology* **26**, 351–362 (2018).
- 974 104. Comolli, L. R. & Banfield, J. F. Inter-species interconnections in acid mine drainage microbial  
975 communities. *Front. Microbiol.* **5**, (2014).
- 976 105. Romero, M. L. R. *et al.* Simple yet functional phosphate-loop proteins. *PNAS* **115**, E11943–E11950  
977 (2018).
- 978 106. Szabó, Z. *et al.* Identification of diverse archaeal proteins with class III signal peptides cleaved by  
979 distinct archaeal prepilin peptidases. *J Bacteriol* **189**, 772–778 (2007).
- 980 107. Flemming, H.-C. *et al.* Biofilms: an emergent form of bacterial life. *Nat Rev Micro* **14**, 563–575  
981 (2016).

- 982 108. Chaban, B., Voisin, S., Kelly, J., Logan, S. M. & Jarrell, K. F. Identification of genes involved in the  
983 biosynthesis and attachment of *Methanococcus voltae* N-linked glycans: insight into N-linked  
984 glycosylation pathways in Archaea. *Molecular Microbiology* **61**, 259–268 (2006).
- 985 109. Beckmann, G., Hanke, J., Bork, P. & Reich, J. G. Merging extracellular domains: fold prediction for  
986 laminin G-like and amino-terminal thrombospondin-like modules based on homology to pentraxins.  
987 *Journal of Molecular Biology* **275**, 725–730 (1998).
- 988 110. Burstein, D. *et al.* New CRISPR–Cas systems from uncultivated microbes. *Nature* **542**, 237–241  
989 (2017).
- 990 111. Makarova, K. S. *et al.* Evolutionary classification of CRISPR–Cas systems: a burst of class 2 and  
991 derived variants. *Nat Rev Microbiol* **18**, 67–83 (2020).
- 992 112. Podar, M. *et al.* A genomic analysis of the archaeal system *Ignicoccus hospitalis*-*Nanoarchaeum*  
993 *equitans*. *Genome Biology* **9**, R158 (2008).
- 994 113. López-Madrigal, S. & Gil, R. Et tu, brute? Not even intracellular mutualistic symbionts escape  
995 horizontal gene transfer. *Genes (Basel)* **8**, (2017).
- 996 114. Quinn, T. P., Richardson, M. F., Lovell, D. & Crowley, T. M. propr: An R-package for identifying  
997 proportionally abundant features using compositional data analysis. *Scientific Reports* **7**, 1–9 (2017).
- 998 115. Saiyari, D. M. *et al.* A review in the current developments of genus *Dehalococcoides*, its consortia  
999 and kinetics for bioremediation options of contaminated groundwater. *Sustainable Environment*  
1000 *Research* **28**, 149–157 (2018).
- 1001 116. Søndergaard, D., Pedersen, C. N. S. & Greening, C. HydDB: A web tool for hydrogenase  
1002 classification and analysis. *Sci Rep* **6**, (2016).
- 1003 117. Huber, H. *et al.* A new phylum of Archaea represented by a nanosized hyperthermophilic  
1004 symbiont. *Nature* **417**, 63–67 (2002).

- 1005 118. Jarett, J. K. *et al.* Single-cell genomics of co-sorted Nanoarchaeota suggests novel putative host  
1006 associations and diversification of proteins involved in symbiosis. *Microbiome* **6**, 161 (2018).
- 1007 119. Golyshina, O. V. *et al.* 'ARMAN' archaea depend on association with euryarchaeal host in culture  
1008 and in situ. *Nature Communications* **8**, 60 (2017).
- 1009 120. Krause, S., Bremges, A., Münch, P. C., McHardy, A. C. & Gescher, J. Characterisation of a stable  
1010 laboratory co-culture of acidophilic nanoorganisms. *Scientific Reports* **7**, 3289 (2017).
- 1011
